# Supplementary material for: Loss of Dnmt3a dependent methylation in inhibitory neurons impairs neural function through a mechanism that impacts Rett syndrome
Source: bioRxiv preprint, doi:10.1101/815639, version 1 (2019-10-22)
Supplement: Supplemental table 2 [file 815639_file03.xlsx]

## Sheet: RNA-Seq Results
gene	gene name	chromosome	transcription start	transcription end	Gene Length	Dnmt3a cKO vs WT (log2FoldChange)	Dnmt3a cKO vs WT (lfcSE, standard error)	Dnmt3a cKO vs WT (stat, Wald test value)	Dnmt3a cKO vs WT (pvalue)	Dnmt3a cKO vs WT (padj)	Mecp2 cKO vs WT (log2FoldChange)	Mecp2 cKO vs WT (lfcSE, standard error)	Mecp2 cKO vs WT (stat, Wald test value)	Mecp2 cKO vs WT (pvalue)	Mecp2 cKO vs WT (padj)	Dnmt3a cKO (mean expreesion of 4 samples on normalized counts)	Mecp2 cKO (mean expreesion of 4 samples on normalized counts)	Wild-type (mean expreesion of 4 samples on normalized counts)	HZ10080 (Normalized Read Count)	HZ10081 (Normalized Read Count)	HZ10082 (Normalized Read Count)	HZ10083 (Normalized Read Count)	HZ10084 (Normalized Read Count)	HZ10085 (Normalized Read Count)	HZ10086 (Normalized Read Count)	HZ10087 (Normalized Read Count)	HZ10088 (Normalized Read Count)	HZ10089 (Normalized Read Count)	HZ10090 (Normalized Read Count)	HZ10091 (Normalized Read Count)
ENSMUSG00000000001.4	Gnai3	chr3	108107280	108146146	38866	-0.0507053	0.0858954	-0.590315	0.55498	0.813893	-0.0377499	0.0860343	-0.438778	0.660823	0.971647	3019.64	3049.87	3136.23	2845.78	2947.77	3565.35	2840.57	3094.57	2829.95	2796.11	3357.93	3095.41	2985.17	3260.71	3203.65
ENSMUSG00000000003.15	Pbsn	chrX	77837901	77853623	15722	0.196155	0.136793	1.43396	0.151585	NA	0.104363	0.13401	0.778773	0.436113	NA	5.84745	4.45202	3.03973	5.17415	5.36153	3.75828	3.51411	3.52658	7.09706	6.13182	6.63436	4.78869	0.922202	2.84944	3.59859
ENSMUSG00000000028.14	Cdc45	chr16	18780447	18811987	31540	0.306747	0.1206	2.54351	0.0109746	0.111475	0.114856	0.12276	0.935615	0.349472	0.877907	175.048	150.158	136.426	129.354	150.123	165.364	155.792	194.843	188.072	166.581	150.695	154.196	130.03	147.221	114.255
ENSMUSG00000000037.16	Scml2	chrX	161117193	161258213	141020	0.0111703	0.130822	0.0853854	0.931955	0.978524	-0.133474	0.132807	-1.00502	0.314887	0.857427	125.268	110.814	124.044	108.657	92.2184	142.814	99.5664	118.14	122.424	128.768	131.739	121.633	100.52	146.271	127.75
ENSMUSG00000000049.11	Apoh	chr11	108343354	108414396	71042	0.419874	0.107041	3.92257	8.76097e-05	0.00387792	0.0815478	0.109008	0.748093	0.454404	0.924463	367.435	281.592	264.267	257.673	347.427	270.596	250.673	379.989	357.514	386.305	345.934	264.336	284.038	228.905	279.791
ENSMUSG00000000056.7	Narf	chr11	121237253	121255856	18603	0.129229	0.0837484	1.54306	0.122817	0.421909	0.160746	0.0838667	1.91669	0.0552777	0.48476	3428.58	3510.08	3114.51	3770.92	3081.81	3408.76	3778.84	3504.54	3282.39	3135.4	3792.01	2906.73	3312.55	3060.3	3178.46
ENSMUSG00000000058.6	Cav2	chr6	17281185	17289115	7930	0.0108438	0.165585	0.0654876	0.947786	0.982969	-0.0220034	0.165849	-0.132671	0.894453	0.993536	43.8968	42.257	43.337	32.0797	40.7476	56.3741	39.8266	35.2658	56.7764	54.1644	29.3807	51.7179	49.7989	48.4405	23.3909
ENSMUSG00000000078.7	Klf6	chr13	5861482	5870394	8912	-0.0135781	0.155224	-0.0874744	0.930294	0.97795	0.0610942	0.155321	0.393342	0.694067	0.977018	406.952	439.074	412.76	467.743	461.092	476.048	351.411	386.16	560.667	437.403	243.576	466.418	492.456	432.166	259.998
ENSMUSG00000000305.12	Cdh4	chr2	179442431	179899373	456942	0.574856	0.121279	4.73994	2.13782e-06	0.000193514	0.738959	0.121282	6.09289	1.1089e-09	9.26868e-07	28260.9	32323.6	17590.2	32297	35936.2	27313.9	33747.2	31494.1	23281.9	30790.9	27476.7	17745.9	12879.5	20075.3	19660
ENSMUSG00000000088.7	Cox5a	chr9	57521274	57532426	11152	0.103095	0.0970143	1.06268	0.287928	0.619867	0.0729448	0.0975488	0.747778	0.454594	0.924503	741.009	724.42	685.141	751.287	675.553	678.995	791.846	690.328	849.872	630.555	793.28	682.867	746.983	645.874	664.84
ENSMUSG00000000093.6	Tbx2	chr11	85832551	85841948	9397	-0.167199	0.16386	-1.02038	0.307549	NA	0.0528716	0.16373	0.322918	0.746757	NA	12.2262	18.084	16.4668	10.3483	22.5184	12.5276	26.9415	14.1063	11.5327	7.15379	16.112	14.3661	21.2106	11.3978	18.8926
ENSMUSG00000000094.12	Tbx4	chr11	85886422	85916097	29675	-0.163857	0.111337	-1.47172	0.141096	NA	-0.0687432	0.110359	-0.622907	0.533346	NA	2.03806	3.92857	5.37873	1.03483	8.57845	3.75828	2.34274	4.40822	1.77426	1.02197	0.947766	0.957738	4.61101	12.3476	3.59859
ENSMUSG00000000103.12	Zfy2	chrY	2106015	2170409	64394	-0.0273399	0.161982	-0.168784	0.865966	NA	0.0199877	0.161216	0.123981	0.901331	NA	11.5701	12.7191	12.0667	8.27864	8.57845	18.7914	15.2278	9.69809	7.98419	15.3295	13.2687	13.4083	11.0664	7.59852	16.1937
ENSMUSG00000000120.6	Ngfr	chr11	95568818	95587735	18917	0.0509757	0.160527	0.317552	0.750825	NA	-0.0658472	0.159636	-0.412484	0.679984	NA	20.7247	16.6249	18.7736	10.3483	7.50615	27.5607	21.0847	22.0411	16.8555	31.6811	12.321	8.61964	20.2884	22.7955	23.3909
ENSMUSG00000000125.5	Wnt3	chr11	103774150	103817957	43807	-0.252022	0.164646	-1.53069	0.125847	0.426343	0.164517	0.16446	1.00035	0.317143	0.858867	34.2479	56.9408	46.7245	32.0797	62.1938	71.4072	62.0826	36.1474	34.5981	37.8129	28.433	28.7321	41.4991	62.6878	53.9789
ENSMUSG00000000126.11	Wnt9a	chr11	59306928	59333552	26624	-0.109878	0.146793	-0.748526	0.454143	0.753234	-0.000688624	0.146765	-0.00469202	0.996256	0.999054	204.836	275.657	276.108	310.449	279.872	367.058	145.25	194.843	325.577	240.163	58.7615	384.053	331.07	302.041	87.2659
ENSMUSG00000000127.14	Fer	chr17	63896018	64139494	243476	-0.106916	0.0749694	-1.42613	0.153832	0.467212	-0.0251021	0.0749951	-0.334717	0.737839	0.984095	14598.9	15500.7	15788.1	14841.5	16229.4	16617.8	14314.1	15248	14743.2	14932	13472.5	17325.5	14496.1	16074.7	15256.2
ENSMUSG00000000131.15	Xpo6	chr7	126101715	126200501	98786	-0.0296776	0.0455298	-0.651826	0.514513	0.788809	-0.00193627	0.0456129	-0.0424499	0.96614	0.998383	11220.4	11442.3	11458.2	11215.5	11764.3	11238.5	11550.9	11512.5	11105.1	11433.8	10830.1	11709.3	11002.8	11455.7	11664.8
ENSMUSG00000000134.17	Tfe3	chrX	7762560	7775202	12642	-0.0259621	0.0787641	-0.329619	0.741688	0.906026	0.0761802	0.0791444	0.962547	0.335775	0.870521	809.252	871.955	824.805	937.556	879.291	820.557	850.414	788.19	822.371	810.422	816.026	805.458	941.568	772.199	779.995
ENSMUSG00000000142.15	Axin2	chr11	108920349	108950783	30434	0.110635	0.0894319	1.23709	0.216053	0.548347	0.0925485	0.0898305	1.03026	0.302889	0.853141	1108.31	1093.28	1020.15	1089.68	1233.15	1123.72	926.553	1140.85	1129.32	1060.8	1102.25	1081.29	1069.75	1035.3	894.251
ENSMUSG00000000148.17	Brat1	chr5	140705011	140719379	14368	0.151828	0.0810658	1.8729	0.0610827	0.295191	0.105577	0.0818663	1.28963	0.19718	0.77143	716.711	692.337	640.733	725.416	685.204	630.138	728.592	738.818	710.593	699.027	718.406	699.149	682.429	581.286	600.066
ENSMUSG00000000149.10	Gna12	chr5	140758408	140830431	72023	-0.0155744	0.0776449	-0.200586	0.841023	0.945563	0.115944	0.077718	1.49185	0.135738	0.686008	3567.2	3929.7	3608.27	3697.45	4316.03	4238.08	3467.25	3808.7	3311.66	3582	3566.44	3572.36	3517.28	3637.79	3705.65
ENSMUSG00000000154.16	Slc22a18	chr7	143473736	143499334	25598	0.0727959	0.11942	0.609579	0.542141	NA	0.0902108	0.117888	0.765222	0.444139	NA	4.30064	4.67217	3.03973	7.24381	6.43384	5.01103	0	7.05316	6.20992	2.04394	1.89553	4.78869	0.922202	2.84944	3.59859
ENSMUSG00000000157.15	Itgb2l	chr16	96422288	96443619	21331	0.0815962	0.166662	0.489592	0.624423	NA	0.0385197	0.166716	0.23105	0.817276	NA	23.4171	22.1311	20.8948	21.7314	18.2292	26.3079	22.256	19.3962	27.5011	30.6591	16.112	23.9435	16.5996	14.2472	28.7888
ENSMUSG00000000159.15	Igsf5	chr16	96361668	96525580	163912	0.187171	0.0979707	1.91048	0.056071	0.281848	0.352589	0.0979759	3.59873	0.000319776	0.023242	25685.2	29154.7	22251.1	28126.7	25094.1	32469	30928.8	26323.3	24765.2	24592.7	27059.7	19921.9	22555.2	19984.1	26543.2
ENSMUSG00000000167.14	Pih1d2	chr9	50617321	50625000	7679	0.141937	0.111539	1.27254	0.203181	0.532738	0.012709	0.113199	0.112271	0.910608	0.994941	237.87	214.447	212.328	238.011	205.883	240.53	173.363	213.358	227.993	238.119	272.009	212.618	198.273	209.909	228.511
ENSMUSG00000000168.9	Dlat	chr9	50634633	50659780	25147	0.0174544	0.0524814	0.332583	0.739449	0.904976	0.0675591	0.0526315	1.28363	0.199273	0.771766	4733.34	4904.1	4674.69	4941.31	5157.79	4740.44	4776.85	4785.57	4683.17	4885.02	4579.6	4759	4825.88	4453.68	4660.18
ENSMUSG00000000171.5	Sdhd	chr9	50596357	50603812	7455	0.140545	0.0971069	1.44732	0.147807	0.45902	0.103839	0.0978607	1.06109	0.288649	0.84285	536.063	521.192	481.434	522.589	485.755	449.74	626.683	497.247	593.491	542.666	510.846	471.207	482.312	488.205	484.011
ENSMUSG00000000182.9	Fgf23	chr6	127072902	127081408	8506	0.176761	0.164965	1.07151	0.283941	NA	0.105359	0.164447	0.640686	0.521727	NA	23.0686	20.5239	17.3072	30.0101	18.2292	16.2859	17.5705	18.5145	32.8239	28.6152	12.321	16.2815	23.055	20.8959	8.99649
ENSMUSG00000000184.12	Ccnd2	chr6	127125162	127152193	27031	0.104233	0.131546	0.79237	0.428145	0.734942	0.230492	0.131564	1.75193	0.079785	0.564941	4473.01	4984.7	4089.29	5148.28	4120.87	5710.07	4959.58	5025.37	3673.61	3690.33	5502.73	3199.8	4866.46	3725.17	4565.72
ENSMUSG00000000194.13	Gpr107	chr2	31152316	31218775	66459	-0.0741542	0.0536161	-1.38306	0.166647	0.484067	0.00517415	0.0537155	0.0963251	0.923262	0.994941	6003.99	6353.21	6329.56	6267.96	6438.13	6270.06	6436.68	6282.6	5973.95	5945.82	5813.59	6285.63	6349.36	5944.89	6738.37
ENSMUSG00000000197.7	Nalcn	chr14	123276641	123627144	350503	-0.173734	0.0933392	-1.86132	0.0626986	0.298828	-0.103944	0.0933505	-1.11348	0.265503	0.824661	24684.1	26025.3	28158.6	25128.8	28342.1	27880.1	22750.3	23846.7	23823	28210.5	22856.3	31430.1	25380.8	26511.2	29312.4
ENSMUSG00000000202.9	Btbd17	chr11	114791217	114795945	4728	0.096022	0.158343	0.606417	0.544238	NA	-0.0987804	0.157024	-0.629078	0.529298	NA	18.784	12.4094	15.6392	15.5224	12.8677	2.50552	18.7419	21.1595	11.5327	10.2197	32.224	19.1548	12.9108	15.197	15.294
ENSMUSG00000000214.11	Th	chr7	142892752	142931128	38376	-0.340704	0.154259	-2.20865	0.027199	0.190478	-0.322572	0.154863	-2.08295	0.0372558	0.409531	85.4347	86.4765	119.82	106.587	84.7122	53.8686	100.738	73.1765	83.3904	109.351	75.8212	84.2809	131.875	144.372	118.754
ENSMUSG00000000215.11	Ins2	chr7	142678656	142743381	64725	-0.141291	0.11681	-1.20958	0.226441	NA	-0.0868744	0.11494	-0.755821	0.449757	NA	1.8541	2.54469	3.6898	3.10449	2.14461	3.75828	1.17137	1.76329	2.6614	2.04394	0.947766	2.87321	3.68881	1.89963	6.29754
ENSMUSG00000000216.8	Scnn1g	chr7	121734479	121768475	33996	0.472939	0.166632	2.83822	0.00453654	0.0645901	0.149885	0.166722	0.899012	0.368646	NA	38.1587	25.2659	20.303	24.8359	19.3015	28.8134	28.1129	36.1474	39.0338	22.4833	54.9704	25.8589	11.0664	20.8959	23.3909
ENSMUSG00000000223.13	Drp2	chrX	134404551	134456573	52022	-0.113378	0.0459995	-2.46476	0.0137106	0.127592	0.0158187	0.0460907	0.343209	0.731441	0.983615	5774.19	6326.37	6256.37	6300.04	6585.03	6333.95	6086.44	5668.09	6028.95	5678.06	5721.66	6313.41	6260.83	6202.29	6248.96
ENSMUSG00000000244.17	Tspan32	chr7	143005046	143019644	14598	0.0276865	0.164252	0.168561	0.866142	NA	-0.318116	0.16255	-1.95704	0.0503429	NA	16.9826	8.83234	16.2547	10.3483	6.43384	15.0331	3.51411	15.8696	15.0812	13.2856	23.6941	10.5351	18.444	18.0465	17.993
ENSMUSG00000000247.11	Lhx2	chr2	38339281	38369733	30452	-0.192578	0.165878	-1.16096	0.245657	0.579545	0.17756	0.165853	1.07059	0.284355	0.840192	101.53	162.11	130.345	127.284	250.92	192.925	77.3104	118.14	110.891	115.483	61.6048	148.449	124.497	155.77	92.6638
ENSMUSG00000000248.16	Clec2g	chr6	128934381	128984707	50326	0.0301269	0.15302	0.196881	0.84392	0.945956	-0.0351652	0.154553	-0.227529	0.820012	0.988667	50.7905	47.4883	49.2173	41.3932	55.7599	40.0883	52.7116	57.3069	40.8081	50.0765	54.9704	41.1827	60.8653	40.842	53.9789
ENSMUSG00000000253.13	Gmpr	chr13	45507444	45553800	46356	0.070742	0.0731897	0.966556	0.333766	0.658274	-0.0339775	0.073301	-0.463533	0.642982	0.971017	7333.63	6793.64	6964.44	7231.39	6219.38	6599.53	7124.27	7314.12	6995.04	6871.73	8153.63	6626.59	6838.13	7179.65	7213.38
ENSMUSG00000000263.15	Glra1	chr11	55514238	55608198	93960	0.250008	0.165519	1.51045	0.130928	0.434509	0.168296	0.165678	1.0158	0.309724	0.854589	100.588	91.1214	73.6284	51.7415	131.894	115.254	65.5967	74.9398	107.343	146.142	73.9257	81.4077	58.0987	90.2324	64.7747
ENSMUSG00000000266.11	Mid2	chrX	140664599	140767715	103116	0.00396479	0.0706319	0.0561331	0.955236	0.984906	-0.14421	0.0708419	-2.03565	0.041785	0.426726	4620.59	4148.3	4606.81	3875.44	4265.63	4409.71	4042.4	4503.44	4356.7	5045.47	4576.76	4768.58	4204.32	4768.07	4686.27
ENSMUSG00000000275.16	Trim25	chr11	88999376	89020293	20917	-0.002453	0.16669	-0.014716	0.988259	0.996051	-0.238678	0.166537	-1.43318	0.151805	NA	37.1047	26.111	37.1969	17.5921	31.0969	28.8134	26.9415	22.9228	36.3724	26.5712	62.5525	38.3095	23.055	37.0428	50.3803
ENSMUSG00000000276.11	Dgke	chr11	89035179	89066850	31671	-0.0198302	0.07602	-0.260855	0.794204	0.928553	-0.0023376	0.076164	-0.0306917	0.975515	0.998383	3474.4	3520.03	3525.94	3641.57	3230.86	3718.19	3489.51	3573.3	3751.68	3287.68	3284.96	3758.16	3657.45	3528.56	3159.57
ENSMUSG00000000278.10	Scpep1	chr11	88924020	88955465	31445	0.0998066	0.0999139	0.998926	0.31783	0.645117	0.171721	0.100174	1.71422	0.0864876	0.582084	925.163	978.274	856.943	976.879	956.497	1137.5	842.215	893.106	994.475	913.641	899.43	994.132	842.892	854.833	735.913
ENSMUSG00000000282.12	Mnt	chr11	74830920	74845725	14805	0.0909698	0.116062	0.783806	0.433154	0.737998	0.155104	0.11637	1.33285	0.182582	0.756164	569.923	600.215	529.688	662.291	597.275	618.863	522.431	574.832	642.284	563.105	499.472	498.982	670.441	514.799	434.53
ENSMUSG00000000290.13	Itgb2	chr10	77530252	77565708	35456	0.179867	0.163425	1.10061	0.271067	NA	0.0434802	0.162526	0.267527	0.789063	NA	19.8818	15.8343	14.6301	8.27864	21.4461	12.5276	21.0847	22.9228	16.8555	12.2636	27.4852	16.2815	8.29982	12.3476	21.5916
ENSMUSG00000000295.13	Hddc2	chr10	31313383	31328204	14821	0.124574	0.120106	1.0372	0.299644	0.629653	-0.206238	0.121475	-1.69779	0.0895476	0.588843	384.571	293.058	347.749	328.041	242.341	266.838	335.012	378.225	439.13	321.921	399.009	415.658	320.926	347.632	306.78
ENSMUSG00000000386.14	Mx1	chr16	97447035	97462907	15872	0.818258	0.14568	5.61681	1.94518e-08	3.29351e-06	-0.0111839	0.144041	-0.0776439	0.938111	NA	77.2446	8.45208	9.3953	8.27864	9.65076	10.0221	5.85685	90.8094	7.98419	114.461	95.7243	18.197	3.68881	7.59852	8.09684
ENSMUSG00000000301.16	Pemt	chr11	59970614	60046489	75875	0.338824	0.118408	2.86149	0.00421653	0.0613384	0.0115847	0.120329	0.096275	0.923302	0.994941	284.265	217.474	216.083	232.837	247.703	205.452	183.905	291.824	277.672	285.13	282.434	254.758	202.884	239.353	167.335
ENSMUSG00000000303.12	Cdh1	chr8	106603351	106670246	66895	0.146645	0.139838	1.04867	0.294328	NA	0.00653246	0.137724	0.0474315	0.962169	NA	9.24104	6.2288	5.99869	1.03483	2.14461	10.0221	11.7137	11.4614	8.87132	7.15379	9.47766	4.78869	4.61101	3.79926	10.7958
ENSMUSG00000000531.4	Grasp	chr15	101224207	101232755	8548	0.507934	0.0970167	5.23553	1.64515e-07	2.08165e-05	0.317299	0.0975408	3.25299	0.00114197	0.0561476	1238.43	1071.22	839.922	1090.71	1015.47	1135	1043.69	1258.99	1199.4	1107.82	1387.53	735.543	775.572	1001.1	847.469
ENSMUSG00000000308.14	Ckmt1	chr2	121357714	121363737	6023	0.148717	0.0831733	1.78804	0.0737691	0.324237	-0.0988626	0.0836158	-1.18234	0.237069	0.807079	2191.42	1822.78	1962.28	2015.85	1671.73	1664.92	1938.62	2163.56	2253.32	2199.28	2149.53	1775.65	2204.98	1958.52	1909.95
ENSMUSG00000000317.11	Bcl6b	chr11	70224128	70229798	5670	0.45828	0.16547	2.76956	0.0056132	0.0734746	-0.0324846	0.166427	-0.195188	0.845245	NA	33.1459	17.9793	19.0218	14.4876	24.663	17.5386	15.2278	27.331	37.2595	35.7689	32.224	15.3238	15.6774	18.9963	26.0898
ENSMUSG00000000318.16	Clec10a	chr11	70156197	70170834	14637	-0.104338	0.166041	-0.628385	0.529752	NA	-0.1577	0.165361	-0.953672	0.340249	NA	12.3891	11.2473	14.4368	9.31347	13.94	10.0221	11.7137	12.343	11.5327	14.3076	11.3732	12.4506	14.7552	16.1468	14.3944
ENSMUSG00000000320.10	Alox12	chr11	70241457	70255353	13896	0.150312	0.152668	0.984573	0.324834	0.651412	-0.0181049	0.154619	-0.117094	0.906786	0.994941	55.7324	47.2829	48.0528	36.219	49.3261	43.8466	59.7398	58.1885	56.7764	51.0985	56.8659	42.1405	39.6547	46.5409	63.8751
ENSMUSG00000000325.15	Arvcf	chr16	18348182	18407076	58894	-0.0880537	0.0821386	-1.07201	0.283714	0.61654	0.0207595	0.0822928	0.252264	0.800837	0.988088	1800.06	1951.38	1921.39	1945.48	1973.04	2133.45	1753.54	1892.89	1564.01	1809.91	1933.44	1981.56	1806.59	1995.56	1901.86
ENSMUSG00000000326.12	Comt	chr16	18406886	18426852	19966	-0.0767734	0.0999116	-0.768413	0.442242	0.745144	0.0184027	0.0999554	0.184109	0.853928	0.99135	4835.09	5202.37	5129.27	5537.37	4828.6	4410.96	6032.55	4889.6	4439.21	4872.75	5138.78	4567.45	5026.92	4975.13	5947.58
ENSMUSG00000000339.14	Rtca	chr3	116488963	116508208	19245	-0.0532984	0.0616999	-0.863833	0.38768	0.70362	-0.0671722	0.0620249	-1.08299	0.278814	0.836718	2330.1	2307.12	2421.62	2332.51	2275.43	2209.87	2410.68	2279.93	2476.87	2207.46	2356.15	2524.6	2508.39	2360.29	2293.2
ENSMUSG00000000340.10	Dbt	chr3	116513070	116549981	36911	0.129914	0.0756282	1.7178	0.0858326	0.352008	0.150612	0.0759797	1.98226	0.0474502	0.453646	1413.03	1435.95	1285.25	1363.91	1372.55	1557.18	1450.16	1430.91	1508.12	1261.11	1451.98	1309.23	1218.23	1363.93	1249.61
ENSMUSG00000000346.8	Dazap2	chr15	100615628	100620731	5103	0.162641	0.10837	1.50079	0.13341	0.438302	0.0769576	0.108858	0.706955	0.479594	0.935156	775.623	724.979	682.409	745.078	661.613	608.841	884.384	736.173	864.954	771.587	729.779	637.854	787.56	676.268	627.955
ENSMUSG00000000355.13	Mcts1	chrX	38600578	38613426	12848	-0.142272	0.0729101	-1.95133	0.0510175	0.268239	-0.0750822	0.0731089	-1.02699	0.304425	0.853266	2120.58	2227.27	2352.34	2133.82	2110.3	2118.41	2546.56	2031.31	2090.08	2157.38	2203.55	2333.05	2230.81	2384.98	2460.54
ENSMUSG00000000359.3	Rem1	chr2	152626951	152635198	8247	0.00272306	0.105595	0.0257877	0.979427	NA	-0.0733457	0.103741	-0.707009	0.479561	NA	3.73512	2.13351	3.65146	6.20898	1.07231	1.25276	0	3.52658	2.6614	3.06591	5.68659	1.91548	1.8444	0.949815	9.89614
ENSMUSG00000000365.9	Rnf17	chr14	56402581	56525032	122451	-0.210886	0.158551	-1.33008	0.183491	0.507337	0.232775	0.158491	1.46869	0.141916	0.697828	339.729	543.803	426.41	578.47	546.876	744.139	305.727	333.262	357.514	260.602	407.539	475.038	262.828	523.348	444.426
ENSMUSG00000000374.8	Trappc10	chr10	78186725	78244641	57916	-0.0223293	0.0480025	-0.46517	0.64181	0.858533	0.0301352	0.0481858	0.625397	0.531711	0.947709	4259.73	4420.33	4327.49	4460.12	4529.42	4240.59	4451.2	4304.19	4215.65	4223.8	4295.27	4207.34	4213.54	4353.95	4535.13
ENSMUSG00000000378.15	Ccm2	chr11	6546887	6596744	49857	0.0997948	0.107167	0.931204	0.351748	0.67377	0.109307	0.107204	1.01961	0.307912	0.854169	7557.26	7614.11	6987.73	7927.83	6713.71	7143.23	8671.65	8343	7123.67	6969.83	7792.53	6685.97	5994.31	6608.81	8661.82
ENSMUSG00000000381.10	Wap	chr11	6635482	6638637	3155	0.176032	0.152895	1.15133	0.249598	NA	0.121879	0.1514	0.805013	0.420812	NA	11.0013	9.75779	7.26612	10.3483	11.7954	7.51655	9.37096	7.9348	13.307	13.2856	9.47766	3.83095	3.68881	16.1468	5.39789
ENSMUSG00000000384.15	Tbrg4	chr11	6615598	6626067	10469	-0.0640017	0.0790049	-0.810097	0.417884	0.72628	-0.0897836	0.0794753	-1.1297	0.258601	0.820631	1181.69	1158.95	1238.88	1239.73	1134.5	1004.71	1256.88	1194.63	1197.63	1111.9	1222.62	1168.44	1308.6	1208.16	1270.3
ENSMUSG00000000385.7	Tmprss2	chr16	97564684	97611195	46511	0.233893	0.147094	1.59009	0.111814	NA	0.132562	0.14516	0.913215	0.36113	NA	10.0655	7.95328	5.34736	11.3831	3.21692	12.5276	4.68548	8.81644	6.20992	8.17576	17.0598	6.70417	3.68881	3.79926	7.19719
ENSMUSG00000000632.13	Sez6	chr11	77930800	77979048	48248	0.483163	0.0824836	5.85769	4.69358e-09	9.28263e-07	0.22683	0.0825189	2.74883	0.00598092	0.159144	28741.8	23766.9	20085.1	25830.4	21513.7	22817.7	24905.7	28168.5	25866.1	27901.8	33030.6	19918.1	19333	19975.5	21113.9
ENSMUSG00000000392.17	Fap	chr2	62500943	62574075	73132	-0.161839	0.140945	-1.14824	0.250868	0.584438	-0.0182453	0.140937	-0.129457	0.896996	0.993536	449.745	709.118	745.444	856.839	864.279	850.623	264.73	542.211	758.498	375.063	123.21	1131.09	624.331	956.463	269.895
ENSMUSG00000000394.15	Gcg	chr2	62474530	62483650	9120	-0.245139	0.13472	-1.81963	0.0688158	NA	-0.0739052	0.134287	-0.550352	0.582078	NA	4.84984	9.60182	11.7519	7.24381	6.43384	20.0441	4.68548	3.52658	2.6614	12.2636	0.947766	15.3238	11.9886	15.197	4.49824
ENSMUSG00000000399.10	Ndufa9	chr6	126821721	126849136	27415	0.0217735	0.0699945	0.311075	0.755744	0.911571	-0.0450915	0.0703535	-0.640927	0.52157	0.945634	2143.29	2042.06	2110.04	2024.13	1935.51	1963.07	2245.52	2096.55	2268.4	1998.97	2209.24	2217.16	2166.25	2014.56	2042.2
ENSMUSG00000000402.2	Egfl6	chrX	166523007	166585720	62713	0.119266	0.166527	0.716192	0.473873	0.763639	-0.149638	0.166667	-0.897829	0.369277	0.887825	46.7022	32.3574	40.1386	33.1146	47.1815	35.0772	14.0564	49.3721	44.3566	41.9008	51.1793	61.2952	32.2771	41.7918	25.1902
ENSMUSG00000000409.14	Lck	chr4	129548344	129573641	25297	0.202564	0.154102	1.31448	0.188686	0.514912	-0.229664	0.155782	-1.47427	0.140409	0.694368	107.833	69.6913	88.2404	69.3336	50.3984	103.979	55.0544	92.5727	116.214	88.9114	133.635	73.7458	100.52	78.8346	99.861
ENSMUSG00000000411.7	Tssk3	chr4	129489014	129491022	2008	0.264909	0.16671	1.58904	0.112051	NA	0.0457306	0.166522	0.274621	0.783607	NA	23.6279	17.3842	16.3825	15.5224	23.5907	17.5386	12.8851	26.4493	21.2912	30.6591	16.112	22.028	12.9108	17.0967	13.4947
ENSMUSG00000000416.16	Cttnbp2	chr6	18366478	18514843	148365	-0.186803	0.061329	-3.04592	0.0023197	0.0415481	-0.0485286	0.0613349	-0.791207	0.428823	0.914049	59186.5	65367.5	67685.9	66546.8	61717.7	65985.3	67220.2	60396.2	55871.6	59862.9	60615.3	71132.2	61987.6	66656.1	70967.9
ENSMUSG00000000420.15	Galnt1	chr18	24205344	24286818	81474	0.0470077	0.104867	0.448261	0.653965	0.865299	-0.0418977	0.104989	-0.399066	0.689845	0.977018	3363.08	3138.28	3242.35	2659.51	3490.36	3614.21	2789.03	3345.84	3615.95	3161.97	3328.55	3805.09	2949.2	3259.76	2955.35
ENSMUSG00000000439.9	Mkrn2	chr6	115601902	115622624	20722	0.0914526	0.0664132	1.37702	0.168505	0.486656	0.0349926	0.0667181	0.524485	0.599941	0.961843	2627.27	2522.45	2459.26	2539.47	2431.99	2407.8	2710.55	2648.46	2654.3	2444.55	2761.79	2335.92	2537.9	2365.04	2598.19
ENSMUSG00000000440.12	Pparg	chr6	115360951	115490399	129448	-0.0341271	0.166595	-0.204851	0.837689	0.944406	-0.0154056	0.166597	-0.0924724	0.926323	0.995019	1648.85	1690.53	1725.69	1556.38	2701.14	1535.88	968.723	1606.36	2193.88	1764.94	1030.22	1996.88	1837.95	1740.06	1327.88
ENSMUSG00000000441.17	Raf1	chr6	115618067	115676635	58568	-0.0157173	0.0538051	-0.292115	0.770199	0.917771	0.030876	0.053873	0.573125	0.56656	0.954074	10331.6	10681.4	10448	10214.8	10486.1	11041.8	10982.8	10512.7	10197.6	10043.9	10572.3	10473.8	9921.97	10285.5	11110.7
ENSMUSG00000000486.13	Sept1	chr7	127214447	127233130	18683	0.239447	0.106265	2.2533	0.0242403	0.178025	-0.123009	0.109823	-1.12006	0.262687	0.822855	210.709	158.345	174.595	144.876	165.135	145.32	178.048	201.015	204.927	208.482	228.412	160.9	176.141	164.318	197.023
ENSMUSG00000000489.6	Pdgfb	chr15	79995900	80014808	18908	-0.31377	0.122706	-2.55709	0.0105553	0.108889	-0.329112	0.123176	-2.67189	0.00754259	0.180723	440.376	434.376	570.717	559.843	410.693	428.443	338.526	449.639	455.099	391.414	465.353	510.474	656.608	617.379	498.405
ENSMUSG00000000530.16	Acvrl1	chr15	101128522	101145336	16814	0.319996	0.138972	2.3026	0.0213012	0.165102	0.0985258	0.139305	0.707265	0.479402	0.935156	742.054	609.599	557.735	645.734	431.067	710.314	651.282	759.096	588.168	617.27	1003.68	543.995	611.42	485.355	590.17
ENSMUSG00000001155.13	Ftcd	chr10	76575648	76590338	14690	0.750423	0.147587	5.08461	3.68389e-07	4.3568e-05	-0.145582	0.151874	-0.958572	0.337775	0.872003	121.418	51.6033	60.5755	56.9156	60.0492	42.5938	46.8548	122.549	143.715	84.8235	134.583	70.8726	52.5655	53.1896	65.6744
ENSMUSG00000000532.10	Acvr1b	chr15	101174067	101213679	39612	-0.0409033	0.0681132	-0.600519	0.54816	0.81068	0.0548868	0.0681885	0.804927	0.420862	0.912077	5290.8	5671.93	5450.15	5625.34	5372.26	5641.17	6048.95	5619.6	5281.98	5040.36	5221.24	5019.51	5872.58	5234.43	5674.08
ENSMUSG00000000538.18	Tom1l2	chr11	60226714	60352905	126191	-0.0772569	0.0576147	-1.34092	0.179945	0.503	-0.0286109	0.0576465	-0.496315	0.619672	0.965079	20028.2	20737	21165.8	20704.9	21676.7	20743.2	19823.1	21088.1	19487.6	20613.1	18924	21389.2	20278.3	20658.5	22337.4
ENSMUSG00000000544.14	Gpa33	chr1	166130238	166166510	36272	0.0288918	0.107263	0.269355	0.787656	NA	-0.0513473	0.104934	-0.489332	0.624607	NA	3.24543	1.88256	2.77857	2.06966	4.28923	0	1.17137	1.76329	4.43566	2.04394	4.73883	0	2.76661	4.74907	3.59859
ENSMUSG00000000552.9	Zfp385a	chr15	103313895	103340086	26191	-0.035156	0.0685918	-0.512539	0.608274	0.842762	-0.0484567	0.0687015	-0.705322	0.48061	0.935156	5992.61	5934.2	6147.01	6307.29	6087.48	5926.8	5415.24	5944.93	5480.7	5980.57	6564.22	6121.86	6113.28	6043.67	6309.24
ENSMUSG00000000555.7	Itga5	chr15	103344286	103366763	22477	0.0241855	0.0705494	0.342816	0.731737	0.900904	-0.113592	0.0708757	-1.6027	0.109002	0.635611	2891.1	2615.42	2840.42	2637.78	2441.64	2629.54	2752.72	2774.53	2762.53	2800.2	3227.14	2653.89	2943.67	2845.64	2918.46
ENSMUSG00000000560.9	Gabra2	chr5	70957597	71095849	138252	-0.26497	0.0893277	-2.96627	0.00301432	0.0492995	-0.128389	0.0893394	-1.43709	0.150693	0.713164	16886.9	18712.9	20608.1	18057.8	20252.7	18900.4	17640.8	17543	14526.8	18134.9	17343.2	21756.9	17619.6	20605.3	22450.7
ENSMUSG00000000561.14	Wdr77	chr3	105959369	105970037	10668	0.0131526	0.091917	0.143092	0.886218	0.964047	0.00920245	0.0922818	0.0997211	0.920566	0.994941	1089.34	1086.57	1078.88	1058.63	986.522	1018.49	1282.65	1057.97	1210.05	998.465	1090.88	1061.17	1166.59	1083.74	1004.01
ENSMUSG00000000562.5	Adora3	chr3	105870858	105908926	38068	-0.177479	0.143338	-1.23819	0.215646	NA	-0.318142	0.141208	-2.253	0.024259	NA	7.68588	4.47839	11.983	7.24381	2.14461	5.01103	3.51411	8.81644	3.54853	5.10985	13.2687	3.83095	12.9108	11.3978	19.7923
ENSMUSG00000000563.17	Atp5f1	chr3	105942698	105960099	17401	0.0648277	0.0702672	0.922588	0.356222	0.67734	-0.017192	0.0704671	-0.243972	0.807253	0.988506	4032.85	3799.13	3847.25	3864.05	3733.77	3480.16	4118.54	3910.97	4208.55	3921.3	4090.56	3664.31	4235.67	3770.76	3718.25
ENSMUSG00000000567.5	Sox9	chr11	112782224	112787760	5536	0.0674322	0.165075	0.408494	0.682911	0.878467	0.169598	0.165304	1.02598	0.304901	0.853266	35.7658	40.5827	32.7743	25.8707	40.7476	48.8576	46.8548	21.1595	33.711	39.8568	48.336	26.8167	41.4991	30.3941	32.3874
ENSMUSG00000000568.15	Hnrnpd	chr5	99955935	99978938	23003	-0.0124484	0.0902844	-0.137879	0.890336	0.965091	-0.103799	0.0903868	-1.14839	0.250808	0.816743	5459.59	5096.96	5510.92	4615.34	4673.11	5058.64	6040.75	5589.63	4919.15	5260.08	6069.49	5213.93	5625.43	5674.19	5530.14
ENSMUSG00000000579.14	Dynlt1c	chr17	6601671	6609774	8103	0.0504857	0.13971	0.361361	0.71783	0.893964	0.167401	0.140647	1.19022	0.233961	0.806112	68.7041	76.3172	65.7685	76.5774	87.9291	75.1655	65.5967	65.2417	81.6161	65.4061	62.5525	63.2107	74.6983	70.2863	54.8786
ENSMUSG00000000581.8	C1d	chr11	17257579	17269176	11597	0.0529366	0.0944056	0.560735	0.574978	0.825229	0.0373184	0.0950078	0.392793	0.694473	0.977018	655.352	647.83	629.547	628.142	585.479	597.566	780.132	630.376	644.058	616.248	730.727	612.952	651.997	647.774	605.464
ENSMUSG00000000594.7	Gm2a	chr11	55098115	55113029	14914	0.283049	0.107675	2.62874	0.00857029	0.0963237	-0.000908642	0.109473	-0.00830018	0.993377	0.99896	352.41	282.257	282.489	262.847	270.221	284.376	311.584	327.972	406.306	320.899	354.464	326.589	291.416	273.547	238.407
ENSMUSG00000000600.15	Krit1	chr5	3803184	3845564	42380	-0.173661	0.0547114	-3.17413	0.00150287	0.031293	-0.13285	0.054795	-2.42448	0.0153302	0.263572	8435.06	8683.55	9545.8	8858.14	8355.41	8607.7	8912.95	8212.52	8310.65	8849.24	8367.82	9243.13	9792.86	9061.23	10086
ENSMUSG00000000605.9	Clcn4	chr7	7282309	7300851	18542	0.0813023	0.0747469	1.0877	0.276727	0.60867	0.0145298	0.0751273	0.193403	0.846643	0.991148	1840.35	1752.9	1733.99	1590.53	1743.57	1667.42	2010.07	1874.38	1792.89	1849.77	1844.35	1691.37	1835.18	1732.46	1676.95
ENSMUSG00000000617.14	Grm6	chr11	50850685	50866208	15523	-0.0962977	0.118531	-0.812428	0.416546	NA	-0.0731596	0.116606	-0.627407	0.530392	NA	2.51194	2.88264	3.93457	3.10449	1.07231	5.01103	2.34274	4.40822	1.77426	1.02197	2.8433	0.957738	5.53321	4.74907	4.49824
ENSMUSG00000000627.15	Sema4f	chr6	82911885	82939769	27884	0.241471	0.0881991	2.7378	0.00618524	0.0783897	-0.0187335	0.0884977	-0.211684	0.832354	0.991058	3040.12	2501.25	2537.23	2606.74	2562.81	2560.64	2274.8	3264.73	3027.78	2798.15	3069.81	2785.1	2442.91	2773.46	2147.46
ENSMUSG00000000628.10	Hk2	chr6	82725025	82774454	49429	0.164646	0.159789	1.0304	0.302824	NA	-0.0121391	0.158821	-0.0764326	0.939075	NA	24.3008	17.1783	17.7325	23.8011	17.1569	12.5276	15.2278	24.686	12.4198	18.3955	41.7017	10.5351	12.9108	13.2974	34.1867
ENSMUSG00000000631.20	Myo18a	chr11	77763246	77865980	102734	-0.0111892	0.0738676	-0.151477	0.8796	0.961145	0.00637639	0.0739058	0.0862773	0.931246	0.995991	13717.4	13893.5	13829.7	15442.8	14150.2	13197.8	12783.2	13913.2	12607	14078.7	14270.5	13743.5	12892.4	13989.8	14693.1
ENSMUSG00000001300.16	Efnb2	chr8	8617434	8661242	43808	0.33807	0.0933539	3.62139	0.00029303	0.00974075	0.342285	0.0933919	3.66505	0.000247294	0.0194014	9978.79	10011.4	7721.88	9487.32	9109.24	10694.8	10754.3	10324.1	8757.77	9104.73	11728.6	7478.98	7270.64	7801.78	8336.15
ENSMUSG00000000673.8	Haao	chr17	83831356	83846790	15434	-0.00162304	0.165508	-0.00980643	0.992176	NA	-0.0320007	0.16504	-0.193896	0.846257	NA	18.8633	17.8907	18.9316	16.5573	24.663	16.2859	14.0564	11.4614	28.3882	20.4394	15.1642	14.3661	17.5218	29.4443	14.3944
ENSMUSG00000000682.7	Cd52	chr4	134082448	134095082	12634	0.230395	0.140778	1.63658	0.101718	0.384259	-0.0612756	0.143642	-0.426586	0.669681	0.973369	89.5743	68.5121	72.7649	86.9257	52.543	70.1545	64.4253	82.8746	79.8419	96.0652	99.5154	75.6613	59.9431	81.684	73.7712
ENSMUSG00000000686.11	Abhd15	chr11	77515121	77538607	23486	0.00608476	0.0837715	0.0726352	0.942096	0.98155	-0.143435	0.0839427	-1.70873	0.0875011	0.58438	4388.53	3926.74	4368.58	3892	3569.71	3768.3	4476.97	4221.31	4220.97	4268.77	4843.08	4026.33	4788.07	4427.09	4232.85
ENSMUSG00000000693.10	Loxl3	chr6	83034173	83052562	18389	0.190171	0.0918068	2.07142	0.0383193	0.229798	0.021919	0.0940705	0.233006	0.815757	0.988667	291.222	256.228	252.173	264.916	242.341	233.013	284.643	277.718	289.205	286.152	311.815	238.477	258.217	257.4	254.601
ENSMUSG00000000706.16	Btn1a1	chr13	23456992	23465901	8909	-0.0944508	0.0928428	-1.01732	0.309002	NA	-0.107972	0.0912176	-1.18368	0.236541	NA	1.61239	1.29354	3.25689	5.17415	0	0	0	2.64493	0.887132	1.02197	1.89553	2.87321	6.45541	1.89963	1.7993
ENSMUSG00000000708.14	Kat2b	chr17	53566861	53672720	105859	0.231923	0.0942369	2.46107	0.0138524	0.128353	-0.0422337	0.0944285	-0.447256	0.65469	0.971647	4345.18	3527.88	3643.34	3251.44	4073.69	3146.93	3639.45	4293.61	4123.39	4330.09	4633.63	3456.48	3231.4	3680.53	4204.96
ENSMUSG00000000711.3	Rab5b	chr10	128677175	128696264	19089	0.137273	0.0812404	1.68971	0.0910825	0.363377	0.00726223	0.0817066	0.0888817	0.929176	0.995811	1601.13	1455.1	1446.87	1376.32	1309.29	1445.68	1689.11	1663.66	1654.5	1494.12	1592.25	1514.18	1469.07	1431.37	1372.86
ENSMUSG00000000724.10	Cryba1	chr11	77718615	77725283	6668	0.0682247	0.123267	0.55347	0.579942	0.827609	0.000383427	0.124771	0.00307306	0.997548	0.999054	163.771	154.449	154.783	144.876	175.858	119.012	178.048	172.802	148.151	176.801	157.329	177.182	144.786	158.619	138.546
ENSMUSG00000000730.13	Dnmt3l	chr10	78041947	78063622	21675	-0.0182551	0.124295	-0.146869	0.883235	NA	-0.0278066	0.121983	-0.227955	0.819681	NA	3.24608	3.121	3.51577	4.13932	1.07231	3.75828	3.51411	3.52658	3.54853	3.06591	2.8433	3.83095	5.53321	3.79926	0.899649
ENSMUSG00000000731.15	Aire	chr10	78030022	78043610	13588	-0.139189	0.128905	-1.07978	0.280241	NA	-0.128824	0.127387	-1.01128	0.311883	NA	4.30966	4.50811	7.24014	6.20898	3.21692	6.26379	2.34274	8.81644	2.6614	1.02197	4.73883	13.4083	6.45541	1.89963	7.19719
ENSMUSG00000000732.9	Icosl	chr10	78069302	78083913	14611	-0.133101	0.148625	-0.895553	0.370491	NA	0.073921	0.148418	0.498059	0.618443	NA	10.4017	17.9105	14.9704	22.7663	9.65076	8.76931	30.4556	14.988	5.32279	6.13182	15.1642	12.4506	10.1442	7.59852	29.6884
ENSMUSG00000000738.18	Spg7	chr8	123062942	123097760	34818	-0.0129051	0.0562398	-0.229465	0.818508	0.93735	-0.053811	0.0566348	-0.950139	0.342042	0.874877	2381.08	2311.95	2403.04	2247.65	2404.11	2211.12	2384.91	2294.92	2350.9	2393.45	2485.04	2495.87	2351.61	2438.17	2326.49
ENSMUSG00000000739.14	Sult5a1	chr8	123140192	123158315	18123	0.182037	0.13889	1.31066	0.189973	NA	0.0375962	0.135641	0.277174	0.781646	NA	6.13528	4.00448	3.51211	3.10449	3.21692	5.01103	4.68548	4.40822	5.32279	8.17576	6.63436	4.78869	4.61101	2.84944	1.7993
ENSMUSG00000000740.12	Rpl13	chr8	123102350	123105244	2894	0.0436274	0.118956	0.366752	0.713804	0.892113	-0.142557	0.120197	-1.18603	0.23561	0.806724	312.608	268.889	301.82	265.951	205.883	295.651	308.07	283.889	356.627	281.042	328.875	264.336	331.07	325.786	286.088
ENSMUSG00000000743.9	Chmp1a	chr8	123204264	123212763	8499	-0.0263495	0.0953996	-0.276201	0.782394	0.924096	-0.0154609	0.0961748	-0.160759	0.872283	0.992432	446.955	450.458	455.776	473.952	393.536	408.399	525.945	412.61	448.002	460.908	466.301	430.982	489.689	444.513	457.921
ENSMUSG00000000751.13	Rpa1	chr11	75298166	75348324	50158	0.136336	0.0902042	1.51142	0.130682	0.434091	0.0553764	0.090526	0.611718	0.540725	0.949693	1682.74	1583.74	1519.1	1533.62	1600.95	1643.62	1556.75	1719.21	1757.41	1483.9	1770.43	1789.05	1342.73	1533.95	1410.65
ENSMUSG00000000753.15	Serpinf1	chr11	75409769	75422701	12932	0.0915277	0.138586	0.66044	0.508971	0.785957	-0.10024	0.140234	-0.71481	0.474726	0.933512	135.192	113.789	124.476	83.8212	140.472	127.781	103.081	116.377	128.634	157.383	138.374	106.309	125.419	151.021	115.155
ENSMUSG00000000759.14	Tubgcp3	chr8	12614277	12672248	57971	0.0494563	0.0621949	0.795182	0.426508	0.733312	0.0573478	0.0623771	0.919372	0.357901	0.88239	3789.52	3811.74	3657.58	3779.2	3736.99	3691.88	4038.88	3970.04	3984.11	3627.99	3575.92	3513.94	3877.86	3610.24	3628.28
ENSMUSG00000000766.18	Oprm1	chr10	6758506	7038198	279692	-0.24712	0.126007	-1.96116	0.0498606	0.264957	-0.31866	0.126037	-2.5283	0.0114615	0.228306	7795.29	7340.63	9585.01	7082.38	7604.8	8408.52	6266.83	7507.2	8958.26	9094.51	5621.2	10241.1	10905	9348.07	7845.84
ENSMUSG00000000776.12	Polr3d	chr14	70438748	70443471	4723	0.0684469	0.123928	0.552312	0.580735	0.827967	-0.0205135	0.125378	-0.163613	0.870036	0.992432	178.614	165.492	168.844	203.861	156.557	134.045	167.506	176.329	191.62	164.537	181.971	145.576	199.196	178.565	152.041
ENSMUSG00000000782.15	Tcf7	chr11	52252371	52283014	30643	0.0910159	0.111147	0.818879	0.412856	0.723409	0.309037	0.111195	2.77924	0.00544861	0.152192	1086.44	1291.46	1010.36	1438.41	1125.92	1206.41	1395.1	1106.46	917.294	1017.88	1304.13	905.062	1020.88	945.065	1170.44
ENSMUSG00000000787.12	Ddx3x	chrX	13280970	13294052	13082	0.0648551	0.0891327	0.727625	0.466843	0.758788	0.0225951	0.089299	0.253027	0.800247	0.988088	2925.25	2834.65	2786.26	2727.81	2382.66	2974.05	3254.06	2808.04	3180.37	2838.01	2874.57	2767.86	3007.3	2723.12	2646.77
ENSMUSG00000000791.9	Il12rb1	chr8	70808449	70821424	12975	0.400492	0.154467	2.59274	0.00952142	NA	0.0597351	0.152468	0.391787	0.695216	NA	20.8457	10.0683	8.73201	17.5921	10.7231	3.75828	8.19959	29.9759	16.8555	20.4394	16.112	3.83095	6.45541	6.6487	17.993
ENSMUSG00000001741.12	Il16	chr7	83642825	83745726	102901	0.428577	0.0991191	4.32386	1.53319e-05	0.000969992	0.075449	0.101253	0.745157	0.456177	0.925298	410.105	312.921	295.079	266.986	346.355	305.673	332.669	367.646	443.566	390.393	438.815	280.617	314.471	281.145	304.081
ENSMUSG00000000794.9	Kcnn3	chr3	89520164	89675132	154968	0.0788666	0.127188	0.62008	0.535205	0.802279	-0.207764	0.127215	-1.63317	0.102433	0.622029	15017.7	11795.6	14054.8	11906.8	10339.2	9742.7	15193.8	15833.5	13322.1	16020.4	14895.1	11685.4	12469.1	13936.6	18127.9
ENSMUSG00000000804.14	Usp32	chr11	84984442	85140161	155719	-0.197287	0.0802694	-2.45782	0.0139785	0.129137	-0.0831834	0.0802889	-1.03605	0.300178	0.851729	14296.1	15553.9	16539.4	15076.4	16039.6	17108.9	13990.8	14678.5	14046.8	15058.7	13400.5	18181.7	14746.9	16680.6	16548.1
ENSMUSG00000000805.18	Car4	chr11	84957786	84966044	8258	-0.0215039	0.153927	-0.139702	0.888895	0.964863	0.107259	0.153896	0.696956	0.48583	0.935253	184.743	246.038	194.411	215.245	403.187	274.354	91.3668	216.885	286.544	163.515	72.0302	226.026	212.106	227.955	111.556
ENSMUSG00000000811.13	Txnrd3	chr6	89643988	89675529	31541	0.145958	0.158206	0.92258	0.356226	0.67734	-0.0393696	0.159159	-0.247361	0.804629	0.988088	82.1197	67.1613	70.43	64.1595	97.5799	58.8797	48.0262	79.348	75.4062	108.329	65.3958	81.4077	66.3985	82.6339	51.28
ENSMUSG00000000817.10	Fasl	chr1	161780689	161788495	7806	-0.142914	0.166702	-0.857301	0.391279	NA	0.0730733	0.166686	0.438389	0.661104	NA	18.4656	24.9584	22.5139	20.6966	33.2415	21.2969	24.5988	10.5797	18.6298	27.5932	17.0598	14.3661	23.055	25.645	26.9895
ENSMUSG00000000823.16	Zfp512b	chr2	181582103	181592803	10700	0.0378594	0.0791141	0.478542	0.632265	0.853476	0.056797	0.079225	0.716908	0.473431	0.93308	4224.98	4284.34	4109.11	4625.69	4062.97	3798.36	4650.34	4312.12	4450.74	3752.67	4384.36	4074.22	4040.17	4144.99	4177.07
ENSMUSG00000000826.16	Dnajc5	chr2	181520485	181555133	34648	-0.0636256	0.0456212	-1.39465	0.163121	0.479974	-0.0986303	0.0457974	-2.15362	0.0312698	0.380898	6743.74	6579.11	7053.4	6504.94	6486.38	6701.01	6624.1	6748.11	6687.2	6955.53	6584.13	6809.52	7377.61	7069.47	6956.98
ENSMUSG00000000827.18	Tpd52l2	chr2	181497142	181517966	20824	0.0790517	0.0571866	1.38235	0.166865	0.484239	0.100453	0.0574903	1.7473	0.0805852	0.566598	2388.35	2425.08	2256.75	2449.44	2311.89	2387.76	2551.24	2347.82	2299.45	2395.5	2510.63	2159.7	2240.95	2306.15	2320.19
ENSMUSG00000000838.17	Fmr1	chrX	68678541	68717963	39422	-0.0663797	0.0761956	-0.871174	0.383659	0.70115	-0.070682	0.0764005	-0.925151	0.354888	0.881063	2654.6	2646.9	2787.54	2468.07	2592.84	2670.88	2855.8	2669.62	2803.34	2584.56	2560.86	3019.75	2902.17	2783.91	2444.35
ENSMUSG00000000861.15	Bcl11a	chr11	24078056	24174123	96067	-0.00303523	0.0716568	-0.0423578	0.966213	0.988645	-0.0022891	0.0716777	-0.031936	0.974523	0.998383	28040.3	28055.9	28102.7	27845.2	28646.7	29988.5	25743.2	28922.3	29013.6	28412.8	25812.4	28849.9	29799.1	28420.4	25341.3
ENSMUSG00000000869.12	Il4	chr11	53602982	53618669	15687	-0.0964065	0.0764098	-1.2617	0.207056	0.537331	-0.133321	0.0772972	-1.72478	0.0845668	0.576229	681.764	662.906	731.599	720.242	639.095	635.149	657.138	668.286	669.785	685.742	703.242	663.712	742.372	798.794	721.518
ENSMUSG00000000876.11	Pxmp4	chr2	154585758	154603708	17950	0.0436272	0.0764942	0.570334	0.568451	0.821523	-0.0365467	0.0771358	-0.473797	0.635644	0.969815	1095.54	1033.31	1061.44	1028.62	984.377	1064.84	1055.4	1109.99	1076.98	1033.21	1161.96	1170.36	999.667	1112.23	963.524
ENSMUSG00000000881.12	Dlg3	chrX	100767722	100818410	50688	-0.100873	0.0542464	-1.85954	0.0629505	0.299422	-0.0313456	0.0543521	-0.576714	0.564133	0.953707	5864.48	6163.59	6302.21	6186.21	6027.43	6484.28	5956.41	6147.71	5915.4	5493.09	5901.74	6266.48	6121.58	6334.31	6486.47
ENSMUSG00000000884.16	Gnb1l	chr16	18498768	18566679	67911	-0.057438	0.0755569	-0.760196	0.447138	0.748825	-0.0968049	0.0762846	-1.269	0.204442	0.776485	856.185	831.017	892.398	847.526	834.254	811.788	830.501	830.509	786.886	939.19	868.153	958.696	850.27	834.887	925.739
ENSMUSG00000000889.8	Dbh	chr2	27165233	27183200	17967	-0.0471936	0.114112	-0.413572	0.679188	NA	0.00561413	0.112566	0.0498742	0.960223	NA	2.5167	3.3781	3.26973	3.10449	3.21692	2.50552	4.68548	3.52658	3.54853	2.04394	0.947766	5.74643	5.53321	0	1.7993
ENSMUSG00000000901.16	Mmp11	chr10	75923222	75936496	13274	0.0701462	0.133457	0.525608	0.599161	0.837964	-0.067823	0.134428	-0.504532	0.613888	0.963652	238.116	211.19	224.101	203.861	199.449	177.892	263.558	226.583	260.817	230.965	234.098	191.548	306.171	207.06	191.625
ENSMUSG00000000902.13	Smarcb1	chr10	75896769	75921617	24848	0.0765237	0.0736911	1.03844	0.299066	0.629253	-0.058923	0.0739821	-0.796449	0.425771	0.91287	3026.74	2742.2	2862.52	2687.45	2519.92	2768.6	2992.85	3080.47	3028.67	2746.03	3251.78	3003.47	2683.61	2841.85	2921.16
ENSMUSG00000000903.3	Vpreb3	chr10	75943057	75949657	6600	0.147807	0.155332	0.951557	0.341322	NA	-0.061357	0.153312	-0.400211	0.689001	NA	13.2091	8.25236	9.81041	11.3831	8.57845	2.50552	10.5423	14.988	21.2912	6.13182	10.4254	10.5351	12.9108	9.49815	6.29754
ENSMUSG00000000915.15	Hip1r	chr5	123973628	124005558	31930	0.010119	0.0721594	0.140231	0.888478	0.964774	0.116175	0.0723096	1.60663	0.108135	0.633762	2294.48	2478.99	2277.86	2546.72	2469.52	2450.4	2449.33	2431.58	2156.62	2175.77	2413.96	2356.99	2010.4	2371.69	2372.37
ENSMUSG00000000916.15	Nsun5	chr5	135369953	135376805	6852	0.0188332	0.101842	0.184925	0.853288	0.950517	0.00356027	0.102141	0.0348565	0.972194	0.998383	1138.23	1125.15	1121.91	1176.6	946.847	1034.78	1342.39	1141.73	1265.94	1063.87	1081.4	1042.98	1241.28	1059.04	1144.35
ENSMUSG00000000934.8	Top1mt	chr15	75657035	75678800	21765	0.0994834	0.0825918	1.20452	0.228389	0.562489	0.0296868	0.0837214	0.35459	0.722897	0.98159	530.947	503.954	493.116	506.032	492.189	499.851	517.745	483.141	529.618	538.578	572.45	509.517	513.666	513.85	435.43
ENSMUSG00000000948.16	Gm38393	chr7	59974149	60005064	30915	-0.0632582	0.0751358	-0.841919	0.399833	0.712992	0.0813202	0.0751481	1.08213	0.279194	0.836718	20101	22346.1	21054	20809.4	23973.6	22887.9	21713.7	19546.9	19862.9	22129.7	18864.3	23369.8	20692.4	20047.7	20106.2
ENSMUSG00000000957.10	Mmp14	chr14	54431612	54445364	13752	-0.00847139	0.153911	-0.0550408	0.956106	NA	-0.109609	0.152795	-0.717357	0.473154	NA	16.0826	12.592	16.3244	16.5573	9.65076	11.2748	12.8851	17.6329	7.09706	10.2197	29.3807	7.6619	16.5996	10.448	30.5881
ENSMUSG00000000958.9	Slc7a7	chr14	54369442	54417780	48338	0.150313	0.136599	1.10039	0.27116	0.602788	-0.0709254	0.13798	-0.514026	0.607234	0.961843	187.719	154.313	164.297	142.807	153.34	146.573	174.534	221.293	139.28	206.438	183.867	145.576	148.474	147.221	215.916
ENSMUSG00000000959.6	Oxa1l	chr14	54360841	54369673	8832	0.0728063	0.0762136	0.955293	0.33943	0.662866	-0.0313916	0.0768395	-0.408534	0.682882	0.975918	1217.24	1127.09	1153.94	1194.19	1093.75	1002.21	1218.22	1179.64	1282.79	1216.14	1190.39	1108.1	1251.43	1139.78	1116.46
ENSMUSG00000000976.13	Heatr6	chr11	83753696	83783754	30058	0.114737	0.0757814	1.51406	0.130011	0.432826	0.0696914	0.0759337	0.917794	0.358727	0.883052	4201.39	4064.44	3862.51	4464.26	3742.35	3629.24	4421.92	4104.05	4275.98	4044.96	4380.57	3956.42	3708.17	3881.89	3903.58
ENSMUSG00000000983.13	Wfdc18	chr11	83709015	83711348	2333	0.0261019	0.0582952	0.447754	0.654331	NA	0.0606266	0.0577222	1.05032	0.293572	NA	1.13512	2.06966	0.455463	8.27864	0	0	0	2.64493	0	0	1.89553	0	0.922202	0	0.899649
ENSMUSG00000001014.6	Icam4	chr9	21029373	21030595	1222	0.256927	0.157413	1.63219	0.10264	NA	0.198289	0.1563	1.26865	0.204567	NA	15.3088	13.9515	8.81686	8.27864	8.57845	22.5497	16.3992	24.686	10.6456	17.3735	8.52989	5.74643	7.37761	10.448	11.6954
ENSMUSG00000001016.12	Ilf2	chr3	90476126	90488379	12253	0.118582	0.062903	1.88516	0.0594077	0.291162	0.0179258	0.0635471	0.282086	0.777877	0.984875	1532.52	1425.65	1406.91	1385.64	1367.19	1410.61	1539.18	1460.88	1530.3	1525.8	1613.1	1396.38	1462.61	1353.49	1415.15
ENSMUSG00000001017.15	Chtop	chr3	90498956	90509498	10542	0.075154	0.100837	0.745301	0.45609	0.753738	-0.0417871	0.100977	-0.413827	0.679001	0.975212	3485.46	3185.05	3289.25	3233.84	2598.2	3074.27	3833.89	3470.15	3482.88	3093.5	3895.32	3107.86	3451.8	3359.49	3237.84
ENSMUSG00000001018.15	Snapin	chr3	90488026	90491033	3007	0.217073	0.104617	2.07494	0.0379926	0.228688	0.123012	0.105168	1.16967	0.242134	0.809739	763.531	709.328	645.013	842.352	661.613	600.071	733.277	753.806	856.082	676.544	767.69	644.558	648.308	711.411	575.775
ENSMUSG00000001021.12	S100a3	chr3	90560578	90602702	42124	0.0924056	0.16604	0.556525	0.577852	0.826431	0.0543129	0.166171	0.32685	0.743782	0.984462	70.3152	67.1851	62.616	62.0898	61.1215	76.4183	69.1108	86.4012	47.9051	39.8568	107.098	61.2952	37.8103	89.2826	62.0758
ENSMUSG00000001025.8	S100a6	chr3	90612882	90624181	11299	0.495467	0.1622	3.05466	0.00225314	0.0409551	0.293358	0.163246	1.79703	0.0723305	0.542257	50.891	41.0262	29.0208	46.5673	30.0246	48.8576	38.6552	51.1354	41.6952	50.0765	60.657	42.1405	31.3549	22.7955	19.7923
ENSMUSG00000001027.7	Scn4a	chr11	106318592	106353288	34696	-0.0967125	0.146659	-0.659439	0.509614	NA	-0.0489586	0.145416	-0.336681	0.736358	NA	6.57426	7.57744	8.57503	9.31347	5.36153	6.26379	9.37096	12.343	7.09706	3.06591	3.79106	5.74643	4.61101	10.448	13.4947
ENSMUSG00000001029.15	Icam2	chr11	106377656	106388075	10419	-0.149314	0.127868	-1.16773	0.242917	NA	0.00864666	0.12709	0.0680356	0.945757	NA	2.80663	5.49461	5.31537	6.20898	8.57845	2.50552	4.68548	0.881644	4.43566	3.06591	2.8433	6.70417	4.61101	0.949815	8.99649
ENSMUSG00000001034.17	Mapk7	chr11	61488812	61494406	5594	-0.0882189	0.11162	-0.790351	0.429323	0.735647	0.0691505	0.112005	0.617386	0.53698	0.948676	270.527	306.253	290.295	332.18	365.656	289.387	237.788	264.493	286.544	252.427	278.643	279.66	317.237	276.396	287.888
ENSMUSG00000001036.17	Epn2	chr11	61517249	61579687	62438	-0.174467	0.0651819	-2.67662	0.00743693	0.0881897	-0.0690991	0.065229	-1.05933	0.289449	0.843468	8480.82	9150.79	9618.9	9695.32	8592.39	8959.73	9355.73	9020.1	7676.35	8552.87	8673.95	9393.49	9327.15	9768.84	9986.1
ENSMUSG00000001039.12	B9d1	chr11	61505144	61512931	7787	0.0552096	0.076211	0.724432	0.468801	0.759707	0.0560126	0.0767048	0.730235	0.465247	0.930407	1075.61	1076.7	1033.15	1134.17	950.063	1071.11	1151.46	1069.43	1111.58	996.421	1125	994.132	1088.2	1038.15	1012.1
ENSMUSG00000001052.15	Sec24b	chr3	129982759	130061553	78794	-0.0948285	0.0578863	-1.63819	0.101383	0.383794	0.0247446	0.0579194	0.427225	0.669216	0.973369	12869.2	14018.2	13772.3	14052	13892.8	13252.9	14875.2	12948.7	13049.7	13242.7	12235.7	12900.7	14402	13725.8	14060.6
ENSMUSG00000001053.15	N4bp3	chr11	51643063	51650842	7779	-0.170938	0.120537	-1.41813	0.156152	0.471522	0.0676384	0.120655	0.560591	0.575076	0.95803	220.686	268.702	254.218	293.892	233.763	254.31	292.842	236.281	226.219	188.042	232.203	209.745	289.571	294.443	223.113
ENSMUSG00000001054.9	Rmnd5b	chr11	51623671	51635896	12225	-0.0859694	0.0896604	-0.958834	0.337643	0.661113	0.0267077	0.0898111	0.297377	0.766179	0.984462	1546.41	1683.16	1649.63	1875.11	1450.83	1646.12	1760.57	1536.71	1599.5	1572.81	1476.62	1440.44	1844.4	1674.52	1639.16
ENSMUSG00000001056.3	Nhp2	chr11	51619735	51623714	3979	-0.0568463	0.136249	-0.417224	0.676515	0.875942	-0.0596086	0.136801	-0.435733	0.66303	0.971982	243.623	242.884	256.193	283.543	204.811	189.167	294.014	190.435	299.851	207.46	276.748	262.42	263.75	242.203	256.4
ENSMUSG00000001062.18	Vps9d1	chr8	123242356	123254348	11992	-0.0306313	0.0815133	-0.375783	0.707078	0.889111	0.110256	0.0816693	1.35003	0.177007	0.751775	1441.53	1598.95	1474.01	1701.26	1583.8	1418.12	1692.63	1366.55	1364.41	1598.36	1436.81	1341.79	1541.92	1521.6	1490.72
ENSMUSG00000001065.15	Zfp276	chr8	123254195	123269745	15550	-0.133731	0.0904384	-1.4787	0.139221	0.446519	-0.134822	0.0911223	-1.47957	0.138988	0.691183	586.338	585.956	648.713	618.828	550.093	541.192	633.711	641.837	570.426	516.095	616.995	621.572	667.674	600.283	705.325
ENSMUSG00000001082.12	Mfsd10	chr5	34633642	34637212	3570	-0.0634678	0.106588	-0.59545	0.551542	0.812505	0.0836059	0.106946	0.781756	0.434358	0.914798	355.909	398.877	373.921	432.559	425.706	349.52	387.723	314.747	392.999	369.953	345.934	318.927	437.124	377.076	362.558
ENSMUSG00000001089.14	Luzp1	chr4	136469761	136554780	85019	-0.183948	0.0933376	-1.97078	0.0487494	0.261825	0.0174715	0.0933532	0.187155	0.851539	0.99135	6230.45	7258.72	7162.82	6457.34	8053.02	8340.87	6183.66	6249.98	5793.86	6731.72	6146.26	7455.03	6842.74	7334.47	7019.06
ENSMUSG00000001095.5	Slc13a2	chr11	78397087	78422217	25130	-0.031071	0.0988208	-0.314418	0.753204	NA	-0.0463032	0.0967857	-0.47841	0.632359	NA	1.92289	1.61449	2.33636	2.06966	3.21692	0	1.17137	0.881644	1.77426	4.08788	0.947766	0.957738	3.68881	3.79926	0.899649
ENSMUSG00000001098.15	Kctd10	chr5	114363567	114380508	16941	-0.0573575	0.109494	-0.523842	0.600389	0.838577	-0.0436654	0.109922	-0.39724	0.691191	0.977018	597.351	603.399	625.011	688.162	624.082	544.95	556.401	629.494	597.04	599.896	562.973	521.967	782.027	604.082	591.969
ENSMUSG00000001100.10	Poldip2	chr11	78512193	78522736	10543	0.108566	0.0844752	1.28518	0.19873	0.527891	0.0955009	0.0849348	1.1244	0.260843	0.822279	1038.88	1028.35	958.153	1152.8	952.208	912.008	1096.4	1023.59	1040.61	999.487	1091.83	897.401	1039.32	926.069	969.821
ENSMUSG00000001103.7	Sebox	chr11	78503447	78505081	1634	-0.0221901	0.142492	-0.155728	0.876247	NA	0.0746471	0.141589	0.52721	0.598047	NA	6.76967	8.943	7.24487	15.5224	4.28923	11.2748	4.68548	2.64493	10.6456	7.15379	6.63436	4.78869	10.1442	10.448	3.59859
ENSMUSG00000001105.15	Ift20	chr11	78536361	78541737	5376	0.00926689	0.102418	0.0904813	0.927905	0.97705	0.0295379	0.10269	0.287641	0.773621	0.984875	1068.33	1085.03	1060.54	1206.61	952.208	1031.02	1150.28	898.396	1212.71	1101.68	1060.55	973.062	1213.62	1035.3	1020.2
ENSMUSG00000001119.7	Col6a1	chr10	76708792	76726168	17376	-0.018221	0.0744207	-0.244838	0.806582	0.932569	0.0265079	0.0745552	0.355548	0.722179	0.981268	3405.27	3518.43	3451.42	3720.21	3496.79	3255.92	3600.79	3555.67	3535.22	3212.05	3318.13	3159.58	3566.15	3809.71	3270.22
ENSMUSG00000001120.15	Pcbp3	chr10	76761857	76961887	200030	0.193247	0.0590175	3.27441	0.00105883	0.0246946	0.277425	0.0590561	4.69765	2.63174e-06	0.00060203	13420.8	14255.5	11685.9	13717.7	14506.2	14746.2	14051.7	13572.9	13095.8	13227.4	13787.1	12437.2	10617.3	11741.6	11947.3
ENSMUSG00000001123.15	Lgals9	chr11	78962974	78984946	21972	0.0985557	0.164807	0.598008	0.549835	NA	-0.130482	0.163999	-0.795626	0.426249	NA	24.5652	16.701	21.0107	17.5921	13.94	20.0441	15.2278	32.6208	15.9684	18.3955	31.2763	19.1548	14.7552	12.3476	37.7852
ENSMUSG00000001127.12	Araf	chrX	20797814	20860519	62705	0.0463144	0.0723253	0.640363	0.521937	0.79327	-0.00164363	0.0724169	-0.0226968	0.981892	0.998383	7553.44	7293.66	7302.16	7252.09	6946.4	7341.17	7634.99	7332.64	6853.09	7784.35	8243.66	7485.68	6629.71	7389.56	7703.69
ENSMUSG00000001128.7	Cfp	chrX	20925454	20931555	6101	-0.0623031	0.0890171	-0.6999	0.48399	0.771506	0.0282376	0.0892008	0.316563	0.751575	0.984462	1470.37	1573.15	1540.22	1618.47	1545.19	1409.35	1719.57	1411.51	1318.28	1597.34	1554.34	1377.23	1689.47	1487.41	1606.77
ENSMUSG00000001131.11	Timp1	chrX	20870166	20874735	4569	-0.115074	0.142017	-0.810281	0.417778	0.726236	0.0878167	0.142111	0.617943	0.536613	0.948676	284.598	342.008	316.05	363.225	431.067	357.036	216.703	281.245	279.447	346.448	231.255	356.279	290.494	345.732	271.694
ENSMUSG00000001134.9	Uxt	chrX	20941722	20962017	20295	0.0626731	0.0716042	0.875271	0.381426	0.699133	-0.00536345	0.0721782	-0.0743083	0.940765	0.99649	1299.42	1236.06	1241.37	1363.91	1165.6	1162.56	1252.19	1296.9	1302.31	1262.13	1336.35	1228.78	1297.54	1145.48	1293.69
ENSMUSG00000001138.13	Cnnm3	chr1	36511867	36528237	16370	0.0782656	0.0634866	1.23279	0.217654	0.550186	0.0200165	0.0639963	0.312776	0.754451	0.984462	1673.9	1605.1	1582.25	1583.29	1612.75	1508.32	1716.06	1684.82	1637.65	1579.97	1793.17	1540.04	1611.09	1572.89	1604.97
ENSMUSG00000001143.13	Lman2l	chr1	36419871	36445271	25400	-0.0725487	0.0788182	-0.920456	0.357334	0.678488	-0.222539	0.0790577	-2.8149	0.00487926	0.143292	3455.86	3093.59	3644.84	3176.93	2893.08	3065.5	3238.84	3352.89	3158.19	3711.79	3600.56	3448.81	3668.52	3362.34	4099.7
ENSMUSG00000001150.7	Mcm3ap	chr10	76468927	76515857	46930	-0.0717666	0.0656722	-1.0928	0.274481	0.606223	-0.00671649	0.0657596	-0.102137	0.918648	0.994941	5671.25	5944.76	5973.5	6042.37	5559.91	5901.75	6275.03	5826.79	5744.18	5293.8	5820.23	6320.11	5479.72	5914.5	6179.69
ENSMUSG00000001151.10	Pcnt	chr10	76351263	76442786	91523	0.200332	0.0787036	2.54539	0.0109155	0.11097	0.226094	0.0788849	2.86613	0.0041553	0.129374	2533.34	2582.22	2186.36	2628.47	2738.67	2485.47	2476.28	2712.82	2664.94	2189.06	2566.55	2345.5	2048.21	2233.96	2117.77
ENSMUSG00000001946.14	Esam	chr9	37528078	37538319	10241	0.518173	0.126345	4.10125	4.10921e-05	0.00214912	0.0450079	0.127861	0.352007	0.724833	0.981672	395.649	266.247	256.297	286.648	226.257	258.068	294.014	390.568	332.674	361.777	497.577	226.026	262.828	224.156	312.178
ENSMUSG00000001156.9	Mxd1	chr6	86647042	86669161	22119	0.138966	0.103949	1.33687	0.181265	0.504722	0.207527	0.104022	1.99502	0.0460408	0.447477	3074.99	3243.95	2759.84	3249.37	2820.17	3153.19	3753.07	3396.98	2915.12	2609.09	3378.78	2536.09	2700.21	2629.09	3173.96
ENSMUSG00000001157.13	Gmcl1	chr6	86691768	86733383	41615	-0.0714817	0.0727577	-0.982461	0.325873	0.652284	-0.0653728	0.072817	-0.897768	0.369309	0.887825	9462.35	9505.17	9969.63	9484.22	9454.53	9885.52	9196.42	9534.1	9809.9	8683.68	9821.69	11252.5	9089.22	9846.73	9690.12
ENSMUSG00000001158.13	Snrnp27	chr6	86675151	86684522	9371	0.0422394	0.107658	0.392348	0.694801	0.884234	0.0241061	0.108093	0.223013	0.823526	0.989198	697.017	687.719	674.303	655.047	545.804	707.809	842.215	689.446	682.204	645.885	770.533	667.543	743.295	644.924	641.45
ENSMUSG00000001166.17	Oas1c	chr5	120800194	120812514	12320	0.248261	0.16594	1.49608	0.134632	0.43964	0.141107	0.166206	0.848985	0.39589	0.899531	46.7195	40.8088	34.1568	67.2639	24.663	33.8245	37.4838	41.4373	48.7923	38.8349	57.8137	34.4786	35.9659	43.6915	22.4912
ENSMUSG00000001173.15	Ocrl	chrX	47912387	47965868	53481	-0.0560359	0.0529072	-1.05913	0.289539	0.621563	-0.00474897	0.052982	-0.0896336	0.928578	0.995811	9367.7	9715.37	9748.77	9767.76	9855.57	9711.39	9526.75	9039.5	9517.15	9653.53	9260.62	10458.5	9483	9809.68	9243.89
ENSMUSG00000001175.14	Calm1	chr12	100199435	100209814	10379	0.0263996	0.125315	0.210666	0.833148	0.943243	-0.0707821	0.125339	-0.564726	0.57226	0.956715	11035	10174.5	10794.5	10320.4	8353.27	9432.02	12592.2	10645.9	11736.8	11350	10407.4	9409.78	14292.3	10650.3	8825.55
ENSMUSG00000001211.15	Agpat3	chr10	78269178	78352489	83311	-0.138483	0.0499718	-2.77121	0.00558476	0.0732667	-0.0829452	0.0500877	-1.656	0.0977221	0.612155	6329.16	6583.06	6982.54	6534.95	6781.27	6234.98	6781.06	6457.16	6384.69	6360.74	6114.04	6753.01	6895.3	7050.47	7231.38
ENSMUSG00000001225.12	Slc26a3	chr12	31390871	31473917	83046	0.0569986	0.161974	0.3519	0.724914	NA	-0.101584	0.16062	-0.632451	0.527093	NA	14.8078	11.065	13.5218	9.31347	11.7954	13.7803	9.37096	26.4493	13.307	7.15379	12.321	15.3238	9.22202	14.2472	15.294
ENSMUSG00000001227.11	Sema6b	chr17	56123085	56140343	17258	0.132667	0.0705525	1.88041	0.0600524	0.292606	0.0712959	0.0709614	1.00471	0.315035	0.857616	1828.53	1748.6	1660.45	1905.12	1593.45	1720.04	1775.8	1823.24	1783.14	1737.35	1970.4	1655.93	1581.58	1721.06	1683.24
ENSMUSG00000001228.14	Uhrf1	chr17	56303321	56323486	20165	-0.102127	0.162514	-0.62842	0.529729	0.798491	0.0590382	0.162859	0.36251	0.716971	NA	27.0108	32.6331	30.4693	37.2539	31.0969	37.5828	24.5988	25.5677	36.3724	21.4614	24.6419	25.8589	28.5883	33.2435	34.1867
ENSMUSG00000001229.8	Dpp9	chr17	56186807	56218889	32082	-0.0985108	0.0595836	-1.65332	0.0982659	0.377643	-0.0310108	0.0598342	-0.518278	0.604264	0.961843	2212.23	2321.07	2374.2	2331.47	2505.98	2132.2	2314.63	2258.77	2235.57	2213.59	2141	2354.12	2438.3	2335.59	2368.78
ENSMUSG00000001240.13	Ramp2	chr11	101246028	101259546	13518	0.12884	0.111577	1.15472	0.248204	0.581847	0.00719449	0.112572	0.06391	0.949042	0.99752	391.117	354.728	353.197	390.131	337.777	286.882	404.123	366.764	435.582	380.173	381.95	336.166	372.57	401.772	302.282
ENSMUSG00000001247.16	Lsr	chr7	30957770	30973464	15694	0.247236	0.105817	2.33644	0.0194684	0.157442	0.0573156	0.106477	0.538291	0.590376	0.960342	812.665	700.371	669.908	788.54	623.01	677.742	712.193	798.77	738.094	760.346	953.452	629.234	627.097	801.643	621.657
ENSMUSG00000001248.15	Gramd1a	chr7	31130127	31155896	25769	-0.0503842	0.0659488	-0.763989	0.444874	0.747245	0.0162183	0.0660993	0.245363	0.806176	0.988219	3245.12	3404.78	3365.31	3539.12	3283.4	3178.25	3618.36	3251.5	3241.58	3236.58	3250.84	3062.85	3606.73	3410.78	3380.88
ENSMUSG00000001249.14	Hpn	chr7	31098725	31115290	16565	-0.432257	0.127164	-3.39922	0.000675788	0.018053	-0.00857364	0.126662	-0.0676894	0.946033	0.997293	154.491	221.069	222.462	216.279	230.546	260.574	176.877	139.3	140.167	171.691	166.807	236.561	212.106	262.149	179.03
ENSMUSG00000001260.10	Gabrg1	chr5	70751047	70842617	91570	-0.0319053	0.152909	-0.208655	0.834718	0.943704	-0.261519	0.153159	-1.7075	0.0877284	0.584844	527.992	419.385	544.594	375.643	537.226	357.036	407.637	485.786	401.871	702.093	522.219	486.531	345.826	752.253	593.768
ENSMUSG00000001270.9	Ckb	chr12	111669361	111672338	2977	0.197292	0.120476	1.6376	0.101506	0.383947	0.15207	0.120535	1.26163	0.207083	0.778175	4306.16	4149.69	3662.85	4489.09	3420.66	3747	4942.01	4082.01	4388.64	4182.92	4571.07	2855.97	4617.46	3553.26	3624.68
ENSMUSG00000001280.12	Sp1	chr15	102406143	102436404	30261	0.0588695	0.077791	0.756765	0.44919	0.749717	-0.043299	0.0782136	-0.5536	0.579853	0.958546	1741.65	1615.24	1667.99	1677.46	1555.92	1575.97	1651.63	1623.11	1731.68	1695.45	1916.38	1816.83	1540.08	1768.55	1546.5
ENSMUSG00000001281.9	Itgb7	chr15	102215995	102231935	15940	0.110176	0.136085	0.809612	0.418163	0.726361	-0.108453	0.13837	-0.783789	0.433164	0.914798	111.931	92.1711	101.694	98.3088	85.7845	82.6821	101.909	117.259	120.65	109.351	100.463	90.0274	75.6205	119.677	121.453
ENSMUSG00000001285.12	Myg1	chr15	102331709	102338139	6430	0.118497	0.0829453	1.42862	0.153113	0.466472	0.10295	0.0833008	1.23588	0.216504	0.78759	1399.79	1383.3	1281.93	1510.85	1302.85	1201.4	1518.1	1362.14	1417.64	1328.56	1490.84	1199.09	1295.69	1322.14	1310.79
ENSMUSG00000001288.14	Rarg	chr15	102234938	102257517	22579	0.102775	0.133882	0.767656	0.442691	0.745527	-0.0123104	0.134278	-0.0916788	0.926953	0.995174	547.233	495.136	500.519	549.495	414.983	512.378	503.689	541.33	411.629	471.128	764.847	540.164	432.513	514.799	514.599
ENSMUSG00000001289.12	Pfdn5	chr15	102326116	102331873	5757	0.0197128	0.121221	0.162619	0.870819	0.958799	-0.0417193	0.121894	-0.342258	0.732157	0.983716	381.514	362.638	375.448	411.862	290.595	318.201	429.893	369.409	409.855	364.843	381.95	313.18	355.048	452.112	381.451
ENSMUSG00000002257.7	Def6	chr17	28207778	28228608	20830	0.825705	0.1328	6.21768	5.04563e-10	1.27687e-07	0.14865	0.137963	1.07746	0.281273	0.838677	129.144	72.7039	63.6422	69.3336	65.4107	76.4183	79.6531	137.537	127.747	106.285	145.008	57.4643	59.9431	75.9852	61.1761
ENSMUSG00000001305.5	Rrp15	chr1	186720978	186749358	28380	-0.0758451	0.0882946	-0.859001	0.39034	0.705909	-0.120066	0.0888247	-1.35172	0.176466	0.751361	931.343	901.364	985.898	818.55	898.593	884.448	1003.86	962.756	943.021	886.048	933.549	853.345	1120.48	979.259	990.513
ENSMUSG00000001313.12	Rnd2	chr11	101464999	101471853	6854	0.250533	0.12941	1.93597	0.0528718	0.273547	0.000566116	0.130709	0.00433111	0.996544	0.999054	268.404	216.997	216.923	202.827	231.618	200.441	233.103	232.754	316.706	261.624	262.531	174.308	286.805	186.164	220.414
ENSMUSG00000001323.17	Srr	chr11	74906359	74925948	19589	-0.0845226	0.0640631	-1.31936	0.187047	0.512852	0.0238224	0.0641575	0.371311	0.710406	0.97885	4248.12	4592.55	4514.3	4735.38	4298.88	4383.4	4952.55	4157.83	3992.98	4502.8	4338.87	4382.61	4570.43	4474.58	4629.59
ENSMUSG00000001333.9	Sync	chr4	129287617	129308559	20942	-0.0723173	0.0959343	-0.753822	0.450956	0.750901	-0.00848012	0.0970451	-0.0873833	0.930367	0.995967	240.043	251.922	253.483	236.976	273.438	261.827	235.445	228.346	250.171	263.668	217.986	266.251	246.228	245.052	256.4
ENSMUSG00000001334.9	Fndc5	chr4	129136999	129144593	7594	0.201142	0.112748	1.784	0.0744239	0.325804	0.0487805	0.113138	0.431161	0.666351	0.97315	1074.36	951.197	915.086	1011.03	926.473	759.172	1108.12	1070.32	1131.98	960.652	1134.48	748.951	1068.83	921.32	921.24
ENSMUSG00000001348.15	Acp5	chr9	22126727	22135711	8984	-0.0315345	0.0874964	-0.360409	0.718541	NA	-0.061596	0.0856788	-0.718917	0.472192	NA	1.59521	1.11742	2.09201	0	3.21692	1.25276	0	1.76329	1.77426	0	2.8433	0.957738	4.61101	1.89963	0.899649
ENSMUSG00000001349.5	Cnn1	chr9	22099216	22109630	10414	0.138823	0.159347	0.871203	0.383643	0.70115	-0.0210694	0.160735	-0.131082	0.895711	0.993536	45.17	37.9048	38.9873	48.637	37.5307	33.8245	31.627	42.3189	48.7923	32.703	56.8659	32.5631	46.1101	32.2937	44.9824
ENSMUSG00000001366.14	Fbxo9	chr9	78081499	78109065	27566	0.0726409	0.0597724	1.21529	0.224254	0.557969	0.100661	0.0600308	1.67682	0.0935781	0.599717	2579.82	2633.15	2449.15	2552.93	2648.6	2797.41	2533.67	2698.71	2491.07	2430.24	2699.24	2428.82	2496.4	2397.33	2474.03
ENSMUSG00000001376.17	Vps50	chr6	3498382	3603531	105149	-0.0499994	0.0577965	-0.865094	0.386987	0.703384	-0.0715875	0.057898	-1.23644	0.216295	0.78752	8382.89	8254.96	8688.5	8087.2	8080.9	8318.32	8533.43	8670.09	8575.02	8510.97	7775.47	9315.92	8582.93	8453.35	8401.82
ENSMUSG00000001380.6	Hars	chr18	36766530	36783205	16675	-0.0363982	0.0834365	-0.436238	0.662664	0.869379	-0.0710922	0.0839073	-0.84727	0.396844	0.899531	1117.76	1089.02	1148.47	1154.87	1064.8	970.888	1165.51	1120.57	1215.37	1093.51	1041.59	1030.53	1226.53	1132.18	1204.63
ENSMUSG00000001383.8	Zmat2	chr18	36793923	36799660	5737	0.0942735	0.118222	0.797429	0.425202	0.731952	-0.0415199	0.118907	-0.34918	0.726954	0.98212	509.272	456.17	471.691	464.639	336.704	425.938	597.398	504.301	512.762	525.293	494.734	443.433	500.756	489.154	453.423
ENSMUSG00000001403.13	Ube2c	chr2	164769898	164778822	8924	-0.0363682	0.139327	-0.261027	0.794072	NA	-0.0915882	0.1377	-0.665128	0.505968	NA	7.64994	6.25038	8.47709	9.31347	8.57845	1.25276	5.85685	7.05316	9.75845	7.15379	6.63436	4.78869	7.37761	2.84944	18.8926
ENSMUSG00000001415.10	Smg5	chr3	88336260	88362338	26078	-0.111758	0.122338	-0.913519	0.36097	0.681706	-0.145695	0.122382	-1.1905	0.23385	0.806112	5228.07	5083.39	5732.93	5568.42	4204.51	4194.24	6366.39	5243.14	5324.57	4773.62	5570.97	5094.21	5422.55	5260.07	7154.91
ENSMUSG00000001416.13	Cct3	chr3	88297116	88321767	24651	-0.043044	0.0954675	-0.450876	0.652079	0.864214	-0.00501078	0.0956554	-0.0523837	0.958223	0.998112	1651.78	1700.63	1706.6	1687.81	1576.29	1762.63	1775.8	1658.37	1554.26	1560.55	1833.93	1491.2	1680.25	1594.74	2060.2
ENSMUSG00000001418.13	Glmp	chr3	88325023	88331313	6290	0.0290859	0.115486	0.251857	0.801152	0.930779	-0.0364093	0.116389	-0.312825	0.754414	0.984462	330.254	313.129	322.582	349.773	264.86	280.618	357.268	329.735	337.997	330.096	323.188	263.378	383.636	341.933	301.382
ENSMUSG00000001419.17	Mef2d	chr3	88142372	88172086	29714	-0.0946659	0.0878173	-1.07799	0.281039	0.614251	-0.0208709	0.0878522	-0.237568	0.812216	0.988506	8703.57	9198.5	9343.2	9526.64	8567.73	9031.14	9668.48	9113.56	8008.14	8467.02	9225.55	7960.72	10605.3	8883.62	9923.13
ENSMUSG00000001420.13	Tmem79	chr3	88328655	88336148	7493	0.0689195	0.139771	0.493088	0.62195	0.848288	0.0475687	0.141292	0.336669	0.736367	0.984095	82.8405	81.2305	77.9335	87.9605	71.8445	71.4072	93.7096	89.9277	79.8419	84.8235	76.769	98.647	82.076	61.7379	69.273
ENSMUSG00000001424.14	Snd1	chr6	28475139	28935162	460023	-0.0350935	0.0436753	-0.803509	0.421681	0.729784	-0.0310952	0.0437134	-0.711343	0.476872	0.934688	28352	28431.6	29062.1	27827.6	29040.2	28653.1	28205.4	28027.5	27550.8	29355.1	28474.7	30034.7	28008.2	28889.6	29316
ENSMUSG00000001435.15	Col18a1	chr10	77052178	77166548	114370	-0.178564	0.1462	-1.22136	0.221948	0.55552	-0.0556518	0.14678	-0.379152	0.704575	0.977621	80.8378	90.6997	95.33	87.9605	82.5676	92.7041	99.5664	75.8214	86.0518	109.351	52.1271	90.0274	89.4536	91.1822	110.657
ENSMUSG00000001436.15	Slc19a1	chr10	77032241	77061002	28761	0.225829	0.0898847	2.51242	0.0119905	0.117631	0.0130838	0.0907137	0.144232	0.885317	0.993123	941.65	802.4	794.86	801.993	774.205	729.106	904.297	924.845	989.152	870.718	981.885	838.979	853.037	806.393	681.034
ENSMUSG00000001440.5	Kpnb1	chr11	97159714	97187881	28167	0.00379468	0.0945464	0.0401356	0.967985	0.989005	-0.0882602	0.0946554	-0.932437	0.351111	0.879173	4720.72	4402.15	4707.29	4267.64	3809.9	4483.62	5047.43	4699.16	4849.06	4387.32	4947.34	4441.99	5472.35	4705.38	4209.46
ENSMUSG00000001441.13	Npepps	chr11	97205842	97280638	74796	-0.0679723	0.072838	-0.933198	0.350718	0.673038	-0.00309917	0.0728793	-0.0425248	0.96608	0.998383	10404.2	10908.7	10933.3	10771.5	10984.7	11407.6	10470.9	10680.2	9600.54	10677.5	10658.6	11947.8	9584.44	11147	11054
ENSMUSG00000001444.2	Tbx21	chr11	97098071	97115331	17260	0.065672	0.137677	0.476999	0.633363	NA	-0.134125	0.134351	-0.998315	0.318127	NA	6.43925	3.18044	5.38894	2.06966	3.21692	6.26379	1.17137	5.28987	8.87132	3.06591	8.52989	8.61964	3.68881	4.74907	4.49824
ENSMUSG00000001445.10	Mrpl10	chr11	97041560	97049213	7653	0.131338	0.104584	1.25581	0.209183	0.539531	0.0290664	0.105173	0.276366	0.782267	0.985153	729.867	673.635	658.879	801.993	565.105	581.28	746.162	683.274	783.337	690.852	762.004	627.318	697.185	634.476	676.536
ENSMUSG00000001467.5	Cyp51	chr5	4081145	4104746	23601	0.00132264	0.0965177	0.0137035	0.989066	0.996244	0.17637	0.0965872	1.82602	0.0678475	0.530536	1779.3	2034.92	1777.78	1785.08	1978.41	2505.52	1870.68	1826.77	1798.22	1601.43	1890.79	1784.27	1832.41	1826.49	1667.95
ENSMUSG00000001472.17	Tcf25	chr8	123373753	123403835	30082	-0.0190285	0.0728787	-0.261098	0.794017	0.928487	0.116703	0.0729184	1.60046	0.109497	0.637104	7018.52	7749.31	7116.9	7920.59	7983.32	7323.63	7769.69	6961.46	7632	6847.2	6633.41	6701.29	8031.46	6930.8	6804.04
ENSMUSG00000001473.6	Tubb6	chr18	67390717	67402748	12031	0.0731507	0.103197	0.708848	0.478419	0.767124	-0.0195725	0.104629	-0.187066	0.851609	0.99135	296.181	276.344	279.844	248.359	238.052	331.981	286.986	285.653	314.932	304.547	279.591	280.617	299.716	275.446	263.597
ENSMUSG00000001482.15	Def8	chr8	123423527	123463270	39743	0.0552784	0.063989	0.863874	0.387657	0.70362	-0.0282446	0.0649098	-0.435136	0.663464	0.971982	989.065	930.646	950.445	945.835	960.787	870.667	945.295	929.253	1042.38	979.047	1005.58	938.583	945.257	968.811	949.129
ENSMUSG00000001493.9	Meox1	chr11	101877510	101894374	16864	-0.162776	0.0824974	-1.97311	0.0484833	NA	-0.107678	0.0814613	-1.32183	0.186225	NA	0.443566	1.43664	3.56186	2.06966	0	2.50552	1.17137	0	1.77426	0	0	6.70417	1.8444	5.69889	0
ENSMUSG00000001496.15	Nkx2-1	chr12	56531958	56536908	4950	0.184025	0.152362	1.20782	0.227118	0.56106	0.0511228	0.153394	0.333279	0.738924	0.984095	101.469	88.8481	84.6183	77.6122	120.098	65.1435	92.5382	105.797	110.891	112.417	76.769	66.0839	111.586	80.7342	80.0687
ENSMUSG00000001506.10	Col1a1	chr11	94936224	94953042	16818	-0.0551838	0.143773	-0.383827	0.701107	NA	-0.134166	0.142555	-0.941152	0.346627	NA	12.0099	9.38014	13.8332	8.27864	7.50615	10.0221	11.7137	8.81644	4.43566	9.19773	25.5897	10.5351	4.61101	11.3978	28.7888
ENSMUSG00000001507.16	Itga3	chr11	95044474	95076801	32327	0.126913	0.108142	1.17358	0.240565	0.574104	-0.0274144	0.108701	-0.252201	0.800886	0.988088	829.142	734.184	750.54	693.336	864.279	781.721	597.398	775.847	898.665	816.554	825.504	808.331	746.983	821.59	625.256
ENSMUSG00000001508.15	Sgca	chr11	94962791	94976327	13536	0.00904704	0.162912	0.0555334	0.955713	NA	0.100311	0.162459	0.617453	0.536936	NA	14.6464	17.0771	14.4042	22.7663	20.3738	8.76931	16.3992	19.3962	7.09706	11.2417	20.8508	13.4083	19.3662	10.448	14.3944
ENSMUSG00000001510.8	Dlx3	chr11	95120119	95125296	5177	-0.062891	0.0805026	-0.78123	0.434667	NA	-0.10333	0.0786428	-1.31391	0.188876	NA	1.17294	0.517415	2.07946	2.06966	0	0	0	0	1.77426	1.02197	1.89553	0.957738	4.61101	0.949815	1.7993
ENSMUSG00000001517.14	Foxm1	chr6	128362967	128376146	13179	0.0956506	0.152126	0.62876	0.529506	0.798491	0.00666838	0.153833	0.0433482	0.965424	0.998383	52.4781	47.7222	47.5753	54.846	48.2538	35.0772	52.7116	46.7272	48.7923	61.3182	53.0749	36.394	53.4877	44.6413	55.7782
ENSMUSG00000001518.12	Itfg2	chr6	128409444	128424931	15487	0.129062	0.0790392	1.63288	0.102494	0.385731	0.0208072	0.0797856	0.260789	0.794255	0.987931	976.669	900.775	887.811	953.078	964.003	781.721	904.297	944.241	1000.68	990.289	971.46	830.359	943.412	847.235	930.237
ENSMUSG00000001520.12	Nrip2	chr6	128399296	128416427	17131	0.104369	0.0740374	1.40969	0.158633	0.474427	-0.00349039	0.0744922	-0.0468558	0.962628	0.998265	1773.47	1638.21	1642.73	1620.54	1748.93	1525.86	1657.49	1728.02	1758.3	1897.8	1709.77	1453.85	1732.82	1699.22	1685.04
ENSMUSG00000001521.12	Tulp3	chr6	128321161	128355851	34690	-0.0965558	0.0768256	-1.25682	0.208819	0.539408	0.0299641	0.0769085	0.389608	0.696827	0.977018	3309.64	3631.46	3552.49	3740.91	3786.31	3582.89	3415.71	3410.2	2986.97	3321.4	3520	3312.82	3430.59	3464.92	4001.64
ENSMUSG00000001524.14	Gtf2h4	chr17	35667730	35673739	6009	0.123762	0.118812	1.04166	0.297568	0.627773	0.174327	0.119446	1.45947	0.144435	0.702995	276.435	288.367	250.088	338.389	223.04	278.112	313.927	301.522	290.092	227.899	286.225	247.096	253.605	227.955	271.694
ENSMUSG00000001525.10	Tubb5	chr17	35833921	35838306	4385	0.178364	0.123758	1.44123	0.14952	0.460962	-0.114145	0.124294	-0.918351	0.358435	0.882664	841.231	659.943	725.627	618.828	541.515	648.929	830.501	797.888	907.536	887.07	772.429	599.544	893.614	775.998	633.353
ENSMUSG00000002324.7	Rec8	chr14	55618037	55625395	7358	0.660145	0.146091	4.51872	6.22157e-06	0.000461907	0.132884	0.14696	0.904215	0.365881	0.885942	406.797	249.027	219.912	300.101	317.403	184.156	194.447	404.675	337.997	368.931	515.584	185.801	192.74	272.597	228.511
ENSMUSG00000001552.14	Jup	chr11	100368958	100397763	28805	-0.0455011	0.110644	-0.41124	0.680897	0.877703	-0.0721302	0.110973	-0.649983	0.515703	0.94369	890.753	872.144	923.287	909.615	776.35	989.679	812.931	856.077	758.498	898.312	1050.12	868.668	1087.28	936.517	800.687
ENSMUSG00000001555.10	Fkbp10	chr11	100415697	100424824	9127	-0.193336	0.163334	-1.18368	0.236539	0.570777	-0.114347	0.163755	-0.698279	0.485003	0.935156	32.8862	35.8915	40.952	32.0797	40.7476	25.0552	45.6834	18.5145	35.4853	36.7909	40.7539	42.1405	35.0437	38.9424	47.6814
ENSMUSG00000001558.5	Klhl10	chr11	100441917	100457022	15105	0.0439019	0.0949541	0.462349	0.643831	0.860013	0.0960235	0.0952327	1.0083	0.313309	0.856466	1054.03	1096.92	1019.76	1083.47	1124.85	1127.48	1051.89	1019.18	1203.84	1043.43	949.661	1183.76	886.236	1058.09	950.929
ENSMUSG00000001569.10	Nom1	chr5	29434664	29457843	23179	0.0247013	0.0775071	0.318697	0.749957	0.909394	-0.0890472	0.0780216	-1.14131	0.253739	0.817626	1486.04	1367	1459.17	1285.26	1358.61	1315.4	1508.72	1459.12	1566.67	1477.77	1440.6	1318.81	1577.89	1395.28	1544.7
ENSMUSG00000001576.14	Ergic1	chr17	26561489	26656931	95442	-0.196435	0.0760428	-2.58322	0.00978831	0.103723	0.0316494	0.0760505	0.416162	0.677291	0.975212	11418.4	13497.2	13187.7	13413.5	14801	13118.9	12655.5	11879.3	10598.6	12624.4	10571.4	12516.7	13257.6	12993.5	13983.2
ENSMUSG00000001583.13	Tnk1	chr11	69851005	69858730	7725	0.2473	0.146965	1.68272	0.09243	0.366157	-0.000804721	0.150144	-0.00535968	0.995724	0.999054	55.8352	44.286	44.185	40.3584	40.7476	53.8686	42.1693	56.4252	49.6794	61.3182	55.9182	39.2673	49.7989	41.7918	45.8821
ENSMUSG00000001588.12	Acap1	chr11	69881567	69895539	13972	-0.230649	0.129553	-1.78034	0.0750204	NA	-0.284828	0.127936	-2.22633	0.025992	NA	5.07123	3.74577	10.9986	2.06966	3.21692	5.01103	4.68548	4.40822	8.87132	5.10985	1.89553	2.87321	5.53321	9.49815	26.0898
ENSMUSG00000001604.14	Tcea3	chr4	136247729	136274898	27169	-0.118682	0.162434	-0.730649	0.464994	NA	-0.187109	0.161417	-1.15916	0.246389	NA	13.648	11.8175	16.6412	15.5224	7.50615	12.5276	11.7137	12.343	11.5327	18.3955	12.321	10.5351	10.1442	17.0967	28.7888
ENSMUSG00000001627.12	Ifrd1	chr12	40201567	40248504	46937	0.105862	0.0911402	1.16153	0.245427	0.579306	0.0649072	0.0913454	0.710568	0.477352	0.934773	2268.22	2200.62	2094.48	1896.84	2136.03	2610.75	2158.83	2379.56	2433.4	2006.13	2253.79	2043.81	2085.1	2145.63	2103.38
ENSMUSG00000001630.13	Stk38l	chr6	146724995	146778812	53817	0.0434419	0.0765076	0.567811	0.570163	0.822683	0.190372	0.0765683	2.4863	0.012908	0.242906	3916.55	4363.95	3793.99	4038.94	4310.67	4795.56	4310.64	4335.05	3819.99	3525.8	3985.35	3613.55	3735.84	3842.95	3983.64
ENSMUSG00000001632.16	Brpf1	chr6	113307137	113324860	17723	0.0836921	0.0897718	0.932275	0.351194	0.673425	0.0248603	0.0901379	0.275803	0.7827	0.985189	1385.52	1325.12	1300.99	1475.67	1272.83	1201.4	1350.59	1295.14	1506.35	1326.52	1414.07	1151.2	1478.29	1305.05	1269.4
ENSMUSG00000001642.18	Akr1b3	chr6	34302434	34317478	15044	0.0887744	0.104377	0.850519	0.395036	0.70998	-0.0156195	0.105221	-0.148445	0.881992	0.992669	512.774	472.475	478.566	484.3	500.767	440.971	463.862	460.218	548.248	471.128	571.503	436.729	579.143	470.158	428.233
ENSMUSG00000001663.10	Gstt1	chr10	75783813	75798584	14771	-0.150684	0.166687	-0.903994	0.365998	0.686247	-0.192025	0.166708	-1.15187	0.249376	0.815758	61.8397	58.4125	75.778	52.7763	78.2784	82.6821	19.9133	65.2417	90.4875	48.0326	43.5972	67.9994	79.3094	71.2361	84.567
ENSMUSG00000001665.11	Gstt3	chr10	75774115	75781414	7299	0.0512113	0.103579	0.494419	0.62101	NA	0.146536	0.102369	1.43145	0.152302	NA	2.15304	3.70227	1.38218	4.13932	2.14461	5.01103	3.51411	0.881644	0	2.04394	5.68659	0.957738	0.922202	0.949815	2.69895
ENSMUSG00000001666.8	Ddt	chr10	75771230	75773414	2184	0.00926438	0.163821	0.0565518	0.954902	0.98474	-0.0175673	0.164409	-0.106851	0.914907	NA	35.0532	33.9321	34.717	45.5325	24.663	35.0772	30.4556	29.0943	45.2437	32.703	33.1718	37.3518	47.0323	26.5948	27.8891
ENSMUSG00000001672.14	Marveld3	chr8	109947914	109962203	14289	0.184698	0.157164	1.1752	0.239916	0.573473	-0.175903	0.159138	-1.10535	0.269008	0.826666	61.6373	42.0661	51.0631	47.6022	28.9523	41.341	50.3689	72.2948	43.4695	52.1205	78.6645	52.6756	56.2543	50.3402	44.9824
ENSMUSG00000001674.11	Ddx18	chr1	121553835	121567989	14154	0.167501	0.102334	1.6368	0.101671	0.384145	-0.0145587	0.102995	-0.141353	0.887591	0.993536	852.592	740.182	748.81	782.331	696.999	625.127	856.271	855.195	882.696	830.862	841.616	679.994	871.481	661.071	782.694
ENSMUSG00000001687.15	Ubl3	chr5	148504635	148552789	48154	-0.0965715	0.074725	-1.29236	0.196233	0.52442	0.126574	0.0747344	1.69364	0.090333	0.591112	10554.6	12427.9	11327.6	11839.5	12012	12941	12919	11038.2	9481.67	10265.7	11432.9	10767.8	11001.9	11060.6	12479.9
ENSMUSG00000001700.9	Gramd3	chr18	56432132	56503792	71660	0.0208411	0.15226	0.136879	0.891127	0.96537	-0.00252373	0.152216	-0.01658	0.986772	0.998383	307.316	291.063	292.712	188.339	249.847	285.629	440.435	340.315	123.311	219.724	545.913	201.125	248.072	172.866	548.786
ENSMUSG00000001707.8	Eef1e1	chr13	38644207	38659058	14851	0.0385286	0.0717344	0.5371	0.591198	0.833115	-0.0420416	0.0725415	-0.579552	0.562217	0.953707	955.793	902.27	929.652	868.222	879.291	959.613	901.955	994.495	1011.33	894.224	923.124	859.091	954.479	928.919	976.119
ENSMUSG00000001729.14	Akt1	chr12	112653821	112674884	21063	0.054386	0.0866919	0.627348	0.530431	0.799045	0.0407321	0.0875633	0.465173	0.641807	0.971017	521.632	516.313	500.94	474.987	577.973	472.29	540.001	505.182	567.764	501.787	511.793	476.954	535.799	486.305	504.703
ENSMUSG00000001739.14	Cldn15	chr5	136966616	136975858	9242	-0.0998755	0.166704	-0.599119	0.549094	0.810964	-0.0919337	0.166716	-0.551438	0.581333	0.958546	68.1681	68.8065	78.0241	91.065	52.543	42.5938	89.0241	75.8214	63.8735	56.2083	76.769	31.6054	81.1538	77.8848	121.453
ENSMUSG00000002633.4	Shh	chr5	28456815	28467256	10441	0.613958	0.135056	4.54595	5.46868e-06	0.000415178	0.342844	0.137137	2.50002	0.0124188	0.237784	150.746	119.66	88.2433	107.622	144.761	129.034	97.2237	150.761	177.426	129.79	145.008	91.9429	98.6756	93.0818	69.273
ENSMUSG00000001750.15	Tcirg1	chr19	3896050	3907133	11083	0.162445	0.122036	1.33112	0.183149	0.506924	0.000827371	0.123441	0.00670257	0.994652	0.999054	241.107	210.84	210.573	192.478	228.401	210.463	212.018	205.423	258.155	280.02	220.829	175.266	200.118	204.21	262.697
ENSMUSG00000001751.9	Naglu	chr11	101070012	101077672	7660	0.206647	0.116249	1.77762	0.0754665	0.327936	0.140656	0.118428	1.18769	0.234956	0.806619	133.007	126.423	112.811	125.214	127.604	124.023	128.851	133.128	145.49	109.351	144.06	118.76	116.197	109.229	107.058
ENSMUSG00000001755.12	Coasy	chr11	101082565	101086619	4054	0.148524	0.105838	1.40331	0.160523	0.476807	0.0419508	0.107334	0.390843	0.695913	0.977018	280.285	257.941	249.591	256.638	268.077	268.09	238.959	249.505	306.948	258.558	306.128	213.576	277.583	268.798	238.407
ENSMUSG00000001761.7	Smo	chr6	29735503	29761365	25862	-0.00572319	0.166697	-0.034333	0.972612	0.990413	-0.232245	0.166608	-1.39396	0.163329	0.730944	51.6596	37.0116	52.0074	24.8359	45.0369	31.319	46.8548	50.2537	39.0338	36.7909	80.5601	44.0559	35.9659	38.9424	89.0652
ENSMUSG00000001763.14	Tspan33	chr6	29694222	29718559	24337	0.311582	0.0952064	3.2727	0.00106525	0.0247734	0.0721882	0.0960223	0.751785	0.45218	0.92351	919.988	766.935	725.952	753.356	791.362	833.085	689.937	904.567	955.441	929.993	889.952	734.585	789.405	795.945	583.872
ENSMUSG00000001767.5	Crnkl1	chr2	145917479	145935014	17535	0.176558	0.0848533	2.08074	0.0374578	0.226916	0.072719	0.0854432	0.85108	0.394725	0.89899	1091.35	1010.43	956.898	1014.13	936.124	982.163	1109.29	1027.12	1246.42	1085.33	1006.53	939.541	1019.96	893.775	974.32
ENSMUSG00000001768.15	Rin2	chr2	145784734	145887616	102882	-0.047177	0.102223	-0.461512	0.644431	0.860199	0.170332	0.102326	1.66461	0.0959905	0.608212	610.683	722.536	633.202	644.699	852.484	670.226	722.735	591.583	594.378	600.918	655.854	583.262	608.653	586.985	753.906
ENSMUSG00000001773.14	Folh1	chr7	86718977	86775943	56966	-0.110681	0.152646	-0.725082	0.468402	0.759478	-0.040075	0.152574	-0.262659	0.792814	0.987841	110.871	131.279	143.547	99.3437	125.46	78.9238	221.389	128.72	66.5349	103.219	145.008	101.52	72.8539	92.132	307.68
ENSMUSG00000001774.8	Chordc1	chr9	18292125	18317442	25317	-0.221019	0.0926995	-2.38425	0.017114	0.145209	-0.174224	0.0927834	-1.87775	0.0604155	0.506268	3749.48	3884.85	4431.85	3723.32	3598.66	3808.39	4409.04	3789.31	3529.01	3887.57	3792.01	3800.3	4789.92	4094.65	5042.53
ENSMUSG00000001783.3	Rtcb	chr10	85938637	85957823	19186	0.0721063	0.0723778	0.996249	0.319129	0.646194	0.0371172	0.0728058	0.509811	0.610184	0.962762	1536.3	1497.53	1457.59	1532.58	1410.08	1399.33	1648.12	1505.85	1546.27	1495.14	1597.93	1461.51	1577.89	1367.73	1423.24
ENSMUSG00000001785.13	Pwp1	chr10	85829494	85889096	59602	-0.0154274	0.0636946	-0.242209	0.808618	0.933148	-0.0589258	0.0641242	-0.918933	0.358131	0.88239	1880.21	1823.06	1901.89	1823.37	1782.17	1899.18	1787.51	1970.48	1900.24	1713.84	1936.29	1985.39	1801.98	1878.73	1941.44
ENSMUSG00000001786.14	Fbxo7	chr10	86021972	86051873	29901	0.15551	0.0658261	2.36244	0.018155	0.151356	0.0196909	0.066098	0.297905	0.765776	0.984462	3806.68	3451.24	3402.05	3355.95	3342.38	3352.38	3754.24	3910.97	3664.74	3650.48	4000.52	3272.59	3402.92	3270.21	3662.47
ENSMUSG00000001794.13	Capns1	chr7	30186936	30198811	11875	-0.0829386	0.0955504	-0.86801	0.385389	0.702547	0.0584003	0.0956811	0.610364	0.54162	0.949693	1294.5	1440.82	1378.81	1652.62	1454.05	1171.33	1485.3	1185.81	1353.76	1303.01	1335.4	1280.5	1522.56	1341.14	1371.06
ENSMUSG00000001802.16	Lrp3	chr7	35200027	35215498	15471	0.198952	0.090557	2.19698	0.0280216	0.194484	0.0201708	0.0909501	0.221779	0.824486	0.989541	1809.32	1580.54	1557.55	1738.51	1718.91	1471.99	1392.76	1724.5	1889.59	1786.4	1836.77	1452.89	1671.03	1716.31	1389.96
ENSMUSG00000001804.9	Dsg4	chr18	20436175	20471821	35646	-0.0939009	0.0821451	-1.14311	0.252993	NA	-0.0167473	0.0807809	-0.207318	0.835762	NA	0.475904	1.48014	1.61836	0	1.07231	2.50552	2.34274	0.881644	0	1.02197	0	0.957738	2.76661	0.949815	1.7993
ENSMUSG00000001827.12	Folr1	chr7	101858331	101870788	12457	0.000530604	0.129991	0.00408186	0.996743	NA	-0.0346468	0.128062	-0.270547	0.78674	NA	5.13186	4.41735	5.1138	7.24381	2.14461	1.25276	7.02822	4.40822	5.32279	5.10985	5.68659	1.91548	1.8444	9.49815	7.19719
ENSMUSG00000001829.17	Clpb	chr7	101663633	101795506	131873	-0.0624323	0.0655013	-0.953145	0.340517	0.663869	0.0081641	0.0655543	0.124539	0.900888	0.9944	9119.36	9595.75	9539.24	9591.84	9650.76	9216.55	9923.84	9311.93	8509.37	9702.58	8953.54	9336.99	9518.04	8874.12	10427.8
ENSMUSG00000001833.17	Sept7	chr9	25252439	25308571	56132	-0.236197	0.085027	-2.77791	0.00547102	0.0724594	-0.0727054	0.0850449	-0.854906	0.392603	0.898077	9665.78	10919	11526.1	9812.26	11438.3	12092.9	10332.7	9771.26	9974.91	10409.8	8507.14	11620.2	12582.5	10864	11037.8
ENSMUSG00000001844.10	Zdhhc4	chr5	143316489	143329256	12767	0.0225534	0.0831708	0.271169	0.786261	0.925695	0.0235518	0.083563	0.281845	0.778062	0.984875	1181.31	1182.31	1161.92	1235.59	1102.33	1072.36	1318.96	1172.59	1260.61	1075.11	1216.93	1090.86	1125.09	1192.02	1239.72
ENSMUSG00000001847.14	Rac1	chr5	143503634	143528036	24402	0.0196132	0.0849982	0.230749	0.81751	0.937171	0.0179647	0.0851261	0.211036	0.832859	0.991058	3545.99	3542.08	3494.48	3543.26	3068.94	3617.97	3938.14	3515.12	3624.82	3632.08	3411.96	3273.55	3982.07	3460.17	3262.13
ENSMUSG00000001855.15	Nup214	chr2	31974436	32053975	79539	0.0334181	0.0450808	0.741293	0.458516	0.754001	0.016587	0.0452253	0.366763	0.713796	0.97946	7804.97	7713.29	7623.47	7649.46	7753.85	7636.82	7813.04	7871.32	8043.63	7563.6	7741.35	7851.54	7342.57	7484.54	7815.25
ENSMUSG00000001864.13	Aif1l	chr2	31950139	31973442	23303	0.226865	0.155865	1.45552	0.145524	NA	-0.184734	0.152784	-1.20912	0.226617	NA	14.8081	5.53972	9.45144	6.20898	7.50615	3.75828	4.68548	9.69809	11.5327	14.3076	23.6941	5.74643	11.0664	5.69889	15.294
ENSMUSG00000001865.2	Cpa3	chr3	20215620	20242181	26561	-0.186414	0.120777	-1.54346	0.122719	NA	-0.0690151	0.120205	-0.574146	0.565869	NA	4.1653	7.70187	10.0726	8.27864	15.0123	7.51655	0	1.76329	0.887132	10.2197	3.79106	7.6619	13.833	15.197	3.59859
ENSMUSG00000001870.15	Ltbp1	chr17	75005568	75392512	386944	-0.321267	0.157448	-2.04047	0.0413036	0.238156	0.276467	0.157407	1.75638	0.079023	0.563613	981.198	1833.03	1380.85	1888.56	2276.51	2014.44	1152.63	941.596	1359.97	909.553	713.667	1904.94	1101.11	1535.85	981.517
ENSMUSG00000001891.16	Ugp2	chr11	21321138	21371201	50063	-0.0399749	0.0756204	-0.528625	0.597066	0.836774	-0.177842	0.0759556	-2.3414	0.0192116	0.296314	2542.44	2297.35	2617.3	2210.4	2399.82	2366.46	2212.72	2363.69	2326.06	2780.78	2699.24	2626.12	2819.17	2492.31	2531.61
ENSMUSG00000001901.15	Kcnh6	chr11	106008124	106034549	26425	0.201263	0.095318	2.11149	0.0347299	0.217617	-0.0418275	0.0971197	-0.43068	0.666701	0.973277	412.937	342.702	354.21	338.389	366.729	311.937	353.754	400.267	428.485	435.359	387.636	303.603	353.203	405.571	354.462
ENSMUSG00000002688.8	Prkd1	chr12	50341231	50649098	307867	0.474665	0.0808649	5.86985	4.36187e-09	8.69971e-07	0.422503	0.0808805	5.2238	1.75292e-07	6.45668e-05	38513.6	37056.7	27109.8	38693.3	36072.4	35823.9	37637.3	40102.5	35047	38068.4	40836.4	27642.2	23877.6	26002.1	30917.3
ENSMUSG00000001910.4	Nacc1	chr8	84670483	84687862	17379	-0.00920216	0.0908053	-0.10134	0.919281	0.974097	0.0505502	0.0909915	0.555548	0.57852	0.95848	1651.73	1727.59	1663.08	1873.04	1579.51	1567.2	1890.59	1681.3	1682	1714.87	1528.75	1494.07	1908.96	1579.54	1669.75
ENSMUSG00000001911.16	Nfix	chr8	84699876	84800344	100468	-0.346074	0.148697	-2.32738	0.019945	0.159282	-0.0138073	0.148693	-0.0928573	0.926017	0.995019	3705.46	5095.95	5162.91	5350.07	5463.4	6025.77	3544.56	3366.12	4464.93	4569.23	2421.54	5737.81	6141.86	4896.29	3875.69
ENSMUSG00000001918.17	Slc1a5	chr7	16781340	16798274	16934	-0.0526092	0.165003	-0.318839	0.749849	0.909347	-0.0714318	0.164692	-0.43373	0.664484	NA	29.2051	28.0156	31.631	39.3235	36.4584	17.5386	18.7419	29.0943	23.9526	42.9227	20.8508	28.7321	27.6661	16.1468	53.9789
ENSMUSG00000001924.15	Uba1	chrX	20658326	20683179	24853	-0.0414455	0.0751145	-0.551765	0.58111	0.828221	-0.0404411	0.0752361	-0.537522	0.590907	0.960518	4483.45	4486.12	4621.27	4795.4	4289.23	4159.16	4700.71	4350.03	4476.47	4597.84	4509.47	4124.02	5128.36	4523.02	4709.66
ENSMUSG00000001930.17	Vwf	chr6	125546774	125686679	139905	-0.046186	0.1474	-0.313339	0.754023	0.911243	-0.113317	0.146981	-0.770963	0.440729	NA	35.5015	29.536	39.7912	25.8707	16.0846	18.7914	57.3971	43.2006	20.404	22.4833	55.9182	18.197	21.2106	18.9963	100.761
ENSMUSG00000001942.8	Siae	chr9	37555698	37649655	93957	-0.171921	0.0927751	-1.85309	0.0638693	0.301613	-0.20953	0.0929389	-2.25449	0.0241652	0.334496	2702.43	2626.31	3078.39	2962.72	2307.6	2435.36	2799.57	2623.77	2926.65	2521.2	2738.09	3514.9	3048.8	2933.98	2815.9
ENSMUSG00000001943.8	Vsig2	chr9	37539255	37544205	4950	-0.062419	0.0785306	-0.794837	0.426708	0.733517	0.00392969	0.0787796	0.0498822	0.960216	0.998112	1520.02	1596.47	1591.71	1726.1	1418.66	1603.53	1637.57	1567.56	1514.33	1415.43	1582.77	1474.92	1750.34	1567.19	1574.39
ENSMUSG00000002908.17	Kcnn1	chr8	70842049	70863258	21209	0.484665	0.130715	3.7078	0.000209071	0.00759333	0.183482	0.131831	1.3918	0.163984	0.731063	343.688	266.036	227.194	315.623	236.98	283.123	228.417	346.486	371.708	322.943	333.613	235.604	302.482	188.063	182.629
ENSMUSG00000003309.14	Ap1m2	chr9	21294275	21312337	18062	0.728506	0.118447	6.1505	7.72369e-10	1.89106e-07	0.0880235	0.123734	0.711393	0.476841	0.934688	173.668	103.708	96.302	96.2392	101.869	126.529	90.1955	168.394	187.185	179.867	159.225	96.7315	96.8312	102.58	89.0652
ENSMUSG00000001962.8	Fam50a	chrX	74313033	74320149	7116	0.0645424	0.0948992	0.680116	0.496431	0.779316	0.114568	0.0954791	1.19993	0.230168	0.80315	509.7	529.604	485.151	579.505	477.176	566.247	495.489	509.59	528.731	517.117	483.36	408.954	537.644	492.004	502.004
ENSMUSG00000001964.14	Emd	chrX	74254687	74261548	6861	0.042507	0.138441	0.307041	0.758812	0.912083	-0.00388443	0.139158	-0.0279139	0.977731	0.998383	205.969	197.527	198.067	199.722	172.641	191.672	226.074	165.749	206.702	225.855	225.568	135.041	257.294	196.612	203.321
ENSMUSG00000001983.7	Taco1	chr11	106066061	106073612	7551	0.202738	0.116812	1.7356	0.0826348	0.344782	-0.159424	0.119464	-1.33449	0.182044	0.756164	225.224	167.449	191.203	197.653	160.846	157.848	153.449	242.452	229.767	225.855	202.822	154.196	219.484	183.314	207.819
ENSMUSG00000001985.9	Grik3	chr4	125490700	125714173	223473	-0.0695833	0.102491	-0.678924	0.497186	0.779773	0.00912305	0.102496	0.0890089	0.929075	0.995811	41126.6	43713.6	43405.5	41535	46560.6	47728.9	39030	43166.2	40799.2	46767.4	33773.6	41935.5	50573.5	40600.8	40512.1
ENSMUSG00000001986.16	Gria3	chrX	41400854	41678601	277747	-0.0232106	0.0773999	-0.29988	0.764269	0.914942	0.0482586	0.0774046	0.623459	0.532983	0.947709	79785.6	84089.4	81158.9	87923.3	86270.3	84699	77465	79934.3	84454.1	84690.6	70063.6	86188.8	84129.7	80629.8	73687.5
ENSMUSG00000001988.9	Npas1	chr7	16455721	16477728	22007	-0.14456	0.139364	-1.03728	0.299605	0.629629	-0.22388	0.139992	-1.59923	0.10977	0.637495	250.651	233.133	285.18	180.06	332.415	209.211	210.847	239.807	282.108	250.383	230.307	261.462	359.659	264.998	254.601
ENSMUSG00000001995.9	Sipa1l2	chr8	125418063	125569808	151745	-0.182542	0.116858	-1.56209	0.118267	0.413314	0.326434	0.116795	2.79492	0.00519122	0.148052	2531.01	3820.1	2935	3225.56	4783.56	3903.6	3367.69	2413.94	2904.47	2760.34	2045.28	2969.95	3208.34	2795.3	2766.42
ENSMUSG00000001998.15	Ap4e1	chr2	127008717	127067909	59192	-0.083463	0.0575052	-1.4514	0.146669	0.457865	-0.065128	0.0577085	-1.12857	0.25908	0.820966	3590.83	3639.16	3811.93	3549.47	3496.79	3869.77	3640.62	3679.1	3482.88	3540.1	3661.22	4008.13	3595.66	3893.29	3750.64
ENSMUSG00000001999.15	Blvra	chr2	127070665	127097084	26419	0.037064	0.074503	0.497483	0.618848	0.846828	0.0281862	0.0752522	0.374556	0.70799	0.978301	758.867	754.516	738.575	692.301	787.073	821.81	716.878	744.99	764.708	755.236	770.533	769.064	774.65	697.164	713.421
ENSMUSG00000002006.12	Pdzd4	chrX	73793359	73824969	31610	-0.0832239	0.0662124	-1.25692	0.208781	0.539408	-0.13156	0.066322	-1.98365	0.0472945	0.453335	7150.39	6904.51	7593.16	6848.5	6957.12	7205.87	6606.52	7195.98	6567.44	7556.45	7281.68	7677.23	6958.93	7610.86	8125.63
ENSMUSG00000002007.5	Srpk3	chrX	73774405	73778925	4520	0.294691	0.11331	2.60075	0.00930214	0.10096	0.11048	0.114577	0.964242	0.334924	0.869851	351.972	303.671	278.044	305.275	328.126	256.816	324.469	332.38	397.435	332.14	345.934	220.28	314.471	269.747	307.68
ENSMUSG00000002010.17	Idh3g	chrX	73778963	73786897	7934	0.0684071	0.0883003	0.77471	0.438511	0.742092	0.0468184	0.0884764	0.529162	0.596693	0.961612	2605.72	2563.2	2475.37	2944.09	2398.75	2247.45	2662.52	2453.62	2781.16	2624.42	2563.71	2287.08	2706.66	2557.85	2349.88
ENSMUSG00000002012.13	Pnck	chrX	73655994	73660117	4123	-0.0127432	0.12174	-0.104676	0.916633	0.97313	-0.127768	0.122277	-1.0449	0.296067	0.84965	560.045	508.943	565.716	597.097	442.863	471.037	524.774	585.412	461.309	577.413	616.048	431.94	552.399	632.576	645.948
ENSMUSG00000002014.12	Ssr4	chrX	73787028	73790830	3802	0.00224324	0.0887195	0.0252847	0.979828	0.992818	0.0223516	0.0892289	0.250497	0.802203	0.988088	751.654	762.555	750.195	847.526	704.505	685.259	812.931	709.724	763.821	764.434	768.638	655.093	786.638	799.744	759.304
ENSMUSG00000002015.5	Bcap31	chrX	73686178	73716175	29997	-0.114995	0.0690557	-1.66525	0.0958635	0.373349	-0.0845965	0.069485	-1.21748	0.223423	0.795241	1259.28	1287.64	1368.59	1262.49	1271.76	1344.21	1272.11	1341.86	1186.98	1298.92	1209.35	1346.58	1362.09	1280.35	1485.32
ENSMUSG00000002017.9	Fam98a	chr17	75537086	75551946	14860	-0.0304743	0.0732585	-0.415984	0.677422	0.876381	0.0441916	0.0734768	0.601436	0.547549	0.951415	1845.1	1949.52	1887.08	1869.94	1874.39	2085.84	1967.9	1810.02	1949.92	1723.04	1897.43	1935.59	2033.45	1882.53	1696.74
ENSMUSG00000004035.12	Gstm7	chr3	107926334	107931817	5483	0.657348	0.164974	3.98456	6.76049e-05	0.00320783	0.129208	0.165975	0.778483	0.436284	NA	50.4643	27.0186	22.8839	37.2539	23.5907	23.8024	23.4274	48.4904	47.018	41.9008	64.4481	18.197	23.055	15.197	35.0863
ENSMUSG00000002028.13	Kmt2a	chr9	44803355	44881296	77941	-0.0242964	0.0512869	-0.473736	0.635688	0.855252	-0.0396408	0.0513149	-0.7725	0.439818	0.916144	34498.7	34124.1	35099	34597.5	33691.9	33024	35183.3	34025.3	34591.9	35456.2	33921.5	33322.6	37351.9	35591.4	34130
ENSMUSG00000002031.12	Ift46	chr9	44767908	44793447	25539	0.108208	0.0993403	1.08927	0.276037	0.608124	0.022862	0.0996093	0.229517	0.818467	0.988667	1699.84	1592.58	1564.63	1602.95	1472.28	1821.51	1473.58	1757.12	1801.76	1475.72	1764.74	1711.48	1350.1	1729.61	1467.33
ENSMUSG00000002032.17	Tmem25	chr9	44793769	44799307	5538	-0.0554418	0.125091	-0.443211	0.657613	0.866909	0.0833705	0.125189	0.665957	0.505439	0.941246	903.467	1014.06	946.281	1057.6	1188.12	876.931	933.582	852.55	1047.7	1018.9	694.712	912.724	1148.14	929.868	794.39
ENSMUSG00000002033.14	Cd3g	chr9	44969572	44980431	10859	-0.0351653	0.106906	-0.328937	0.742203	NA	-0.00735421	0.104909	-0.0701008	0.944113	NA	1.90434	2.22989	2.33103	1.03483	4.28923	1.25276	2.34274	0.881644	1.77426	3.06591	1.89553	3.83095	1.8444	0.949815	2.69895
ENSMUSG00000002043.17	Trappc6a	chr7	19508395	19516145	7750	0.40512	0.131225	3.0872	0.00202049	0.0380383	0.18837	0.133486	1.41117	0.158196	0.724895	134.985	111.832	95.21	120.04	119.026	86.4403	121.822	120.785	134.844	156.361	127.948	79.4923	87.6092	112.078	101.66
ENSMUSG00000002052.6	Supt6	chr11	78206746	78245987	39241	-0.0659787	0.0650494	-1.01429	0.310447	0.639318	-0.00284609	0.0651285	-0.0436996	0.965144	0.998383	6415.7	6715.07	6728.51	6792.62	6215.09	6454.21	7398.37	6418.37	6405.09	6277.96	6561.38	6299.04	6932.19	6678.15	7004.67
ENSMUSG00000002055.9	Spag5	chr11	78301529	78322457	20928	-0.191958	0.166665	-1.15176	0.249421	0.583164	0.0998757	0.166664	0.599264	0.548997	0.951812	73.2607	108.649	95.5002	125.214	173.714	68.9017	66.7681	55.5436	88.7132	104.241	44.545	125.464	96.8312	94.0316	65.6744
ENSMUSG00000002057.4	Foxn1	chr11	78357577	78386558	28981	0.136985	0.1444	0.948651	0.342798	NA	-0.191333	0.139808	-1.36854	0.171143	NA	7.47767	2.44509	5.36919	4.13932	3.21692	1.25276	1.17137	8.81644	6.20992	9.19773	5.68659	5.74643	5.53321	5.69889	4.49824
ENSMUSG00000002058.13	Unc119	chr11	78343482	78349164	5682	-0.104392	0.158281	-0.659535	0.509553	0.785957	0.137983	0.158398	0.871113	0.383693	0.894613	39.619	51.2096	44.324	62.0898	46.1092	45.0993	51.5403	39.674	47.018	35.7689	36.0151	26.8167	46.1101	51.29	53.0793
ENSMUSG00000002059.18	Rab34	chr11	78188430	78192193	3763	0.192871	0.0927922	2.07853	0.0376609	0.227561	-0.0419668	0.0938982	-0.446939	0.654919	0.971647	699.496	585.722	604.498	629.177	485.755	582.533	645.425	707.96	707.931	656.105	725.988	566.023	649.23	560.391	642.349
ENSMUSG00000002064.10	Sdf2	chr11	78245746	78255496	9750	0.0488038	0.0842548	0.57924	0.562427	0.818679	-0.0958092	0.0852255	-1.12418	0.260935	0.822279	748.59	672.291	722.257	639.525	677.698	635.149	736.791	719.422	800.193	705.159	769.586	780.557	645.541	768.4	694.529
ENSMUSG00000002068.16	Ccne1	chr7	38097984	38107534	9550	0.340571	0.108743	3.13191	0.00173675	0.0346688	0.191027	0.110272	1.73233	0.0832147	0.573738	293.797	261.21	224.651	255.603	288.45	261.827	238.959	265.375	348.643	301.481	259.688	249.012	225.017	203.26	221.314
ENSMUSG00000002076.11	Hsf2bp	chr17	31944769	32034508	89739	-0.0727631	0.165016	-0.440945	0.659253	0.867215	-0.104341	0.1653	-0.631218	0.527898	0.947709	52.3533	50.3153	57.2701	54.846	53.6153	40.0883	52.7116	43.2006	70.0834	31.6811	64.4481	49.8024	89.4536	48.4405	41.3838
ENSMUSG00000002083.13	Bbc3	chr7	16308393	16318205	9812	0.00261827	0.147266	0.0177791	0.985815	0.994867	0.041445	0.148213	0.279631	0.779761	0.984875	76.2888	79.07	76.2148	82.7864	85.7845	73.9128	73.7963	72.2948	78.0676	69.494	85.2989	76.619	53.4877	106.379	68.3733
ENSMUSG00000002100.15	Mybpc3	chr2	91118144	91136516	18372	0.1723	0.157919	1.09107	0.275244	0.607336	0.0378564	0.159671	0.237091	0.812586	NA	38.1346	33.0263	31.8122	38.2887	30.0246	26.3079	37.4838	41.4373	38.1467	38.8349	34.1196	28.7321	28.5883	29.4443	40.4842
ENSMUSG00000002102.15	Psmc3	chr2	91054009	91066369	12360	0.15748	0.079627	1.97772	0.0479605	0.259662	0.0556572	0.0801143	0.694722	0.487229	0.935631	1455.96	1350.5	1296.47	1391.85	1353.25	1247.75	1409.16	1389.47	1598.61	1344.91	1490.84	1211.54	1435.87	1305.05	1233.42
ENSMUSG00000002103.15	Acp2	chr2	91202885	91214098	11213	0.0223544	0.0957172	0.233547	0.815337	0.936389	0.0629138	0.0958469	0.656398	0.511568	0.942913	2359.69	2433.61	2319.7	2395.63	2342.99	2198.59	2797.23	2182.07	2480.42	2499.74	2276.53	2197.05	2712.2	2332.74	2036.8
ENSMUSG00000002104.11	Rapsn	chr2	91035620	91045729	10109	0.199708	0.166122	1.20218	0.229294	0.563597	-0.0847402	0.16644	-0.509133	0.610659	0.962842	47.2842	32.6318	36.8233	53.8112	19.3015	36.33	21.0847	36.1474	51.4537	40.8788	60.657	42.1405	42.4213	29.4443	33.287
ENSMUSG00000002105.15	Slc39a13	chr2	91061791	91070417	8626	0.167433	0.0893741	1.8734	0.0610132	0.295159	0.0761199	0.0898691	0.847008	0.396991	0.899531	1146.59	1070.35	1011.13	1131.07	1088.39	978.405	1083.52	1051.8	1274.81	1035.26	1224.51	944.33	1138	971.66	990.513
ENSMUSG00000002107.18	Celf2	chr2	6539694	7509563	969869	-0.167523	0.0928056	-1.8051	0.0710592	0.31752	-0.107948	0.092806	-1.16316	0.244765	0.811479	816647	854340	927093	842912	883025	925323	766101	820108	768946	924270	753263	1.05437e+06	799914	903484	950604
ENSMUSG00000002108.10	Nr1h3	chr2	91184061	91202834	18773	-0.0886615	0.104947	-0.844819	0.398212	0.712462	-0.300229	0.106733	-2.8129	0.00490975	0.143632	314.025	265.271	336.045	293.892	240.197	250.552	276.443	293.588	263.478	359.733	339.3	355.321	338.448	340.034	310.379
ENSMUSG00000002109.14	Ddb2	chr2	91211572	91236982	25410	0.133618	0.0621981	2.14827	0.0316925	0.208464	0.128749	0.0624421	2.06189	0.0392178	0.417512	2975.68	2965.57	2703.18	2922.36	2845.9	2911.41	3182.61	2991.42	3002.05	3040.36	2868.89	2798.51	2846.84	2669.93	2497.42
ENSMUSG00000002111.8	Spi1	chr2	91082390	91115756	33366	-0.0727256	0.166705	-0.436252	0.662654	0.869379	0.0966367	0.166716	0.579648	0.562152	NA	23.9767	30.2075	26.39	20.6966	38.603	27.5607	33.9697	19.3962	15.9684	24.5273	36.0151	20.1125	27.6661	20.8959	36.8856
ENSMUSG00000002129.11	Sf3a1	chr11	4160350	4182541	22191	0.0407305	0.079874	0.509935	0.610097	0.843633	-0.0513168	0.0800966	-0.640687	0.521726	0.945634	3083.92	2881.43	2992.46	2832.33	2642.16	2667.12	3384.09	3119.26	3033.99	3043.43	3139	2810	3069.09	2932.08	3158.67
ENSMUSG00000002147.18	Stat6	chr10	127642986	127660957	17971	0.184215	0.102452	1.79806	0.072168	0.32009	0.0542225	0.10333	0.524751	0.599756	0.961843	555.378	502.019	481.119	513.276	468.598	506.115	520.088	489.313	530.505	573.325	628.369	416.616	562.543	438.814	506.502
ENSMUSG00000002190.13	Clgn	chr8	83389867	83428552	38685	0.084895	0.0675777	1.25626	0.209023	0.539531	0.0127561	0.0680264	0.187517	0.851255	0.99135	1831.66	1738.59	1722.62	1697.12	1799.33	1821.51	1636.4	1812.66	1843.46	1825.24	1845.3	1833.11	1822.27	1668.82	1566.29
ENSMUSG00000002204.9	Napsa	chr7	44572380	44586862	14482	0.262042	0.119711	2.18895	0.0286002	0.196355	-0.0324159	0.121164	-0.267537	0.789055	0.986591	340.821	267.937	275.424	286.648	242.341	276.86	265.901	322.682	348.643	301.481	390.479	350.532	280.349	244.102	226.711
ENSMUSG00000002205.16	Vrk3	chr7	44748413	44777515	29102	0.176152	0.0827475	2.12879	0.0332718	0.213647	0.0215481	0.0832486	0.25884	0.795759	0.988032	1548.96	1380.46	1359.15	1512.92	1355.4	1267.79	1385.73	1467.94	1521.43	1464.48	1741.99	1310.19	1247.74	1443.72	1434.94
ENSMUSG00000002210.11	Smg9	chr7	24399619	24422778	23159	0.0616206	0.0635239	0.970037	0.332028	0.656799	0.0200982	0.063736	0.315335	0.752507	0.984462	3813.93	3701.35	3648.77	3930.28	3539.68	3502.71	3832.72	3675.58	4065.73	3622.88	3891.53	3666.22	3709.1	3748.92	3470.84
ENSMUSG00000002221.11	Paxip1	chr5	27740080	27791691	51611	0.0735662	0.0602582	1.22085	0.222143	0.555712	0.0174248	0.0604571	0.288218	0.77318	0.984875	4584.61	4403.03	4348.63	4562.57	4352.49	4159.16	4537.89	4616.29	4453.4	4549.81	4718.92	3970.78	4494.81	4392.89	4536.03
ENSMUSG00000002222.14	Rmnd5a	chr6	71388634	71440637	52003	0.04645	0.0910543	0.510135	0.609957	0.843588	0.0612522	0.0911058	0.672319	0.501381	0.940876	7314.86	7397.76	7063.24	7190	6725.51	7991.35	7684.18	7814.01	6809.62	6519.15	8116.66	7788.33	6208.26	6926.05	7330.34
ENSMUSG00000002227.15	Mov10	chr3	104794836	104818563	23727	-0.0499054	0.081661	-0.611129	0.541114	0.805765	-0.0892005	0.0817933	-1.09056	0.275467	0.833632	4208.9	4088.4	4367.24	4068.95	3803.47	4154.15	4327.04	4536.94	3788.05	4159.42	4351.19	4248.53	3904.6	4410.94	4904.88
ENSMUSG00000002228.7	Ppm1j	chr3	104781056	104786018	4962	0.01666	0.111094	0.149964	0.880793	NA	-0.0224061	0.109316	-0.204966	0.837599	NA	3.86296	3.01096	3.49236	3.10449	6.43384	2.50552	0	2.64493	2.6614	9.19773	0.947766	1.91548	6.45541	3.79926	1.7993
ENSMUSG00000002233.13	Rhoc	chr3	104788375	104794459	6084	0.053394	0.13741	0.388574	0.697591	0.885064	0.0114384	0.13919	0.0821785	0.934505	0.996145	82.305	79.6691	78.5719	73.4729	77.2061	97.7152	70.2822	98.7442	78.9547	76.6477	74.8735	65.1262	87.6092	77.8848	83.6673
ENSMUSG00000002240.12	Prr27	chr5	87825686	87846387	20701	0.0489949	0.116159	0.421791	0.673177	NA	0.0553742	0.114245	0.484699	0.62789	NA	3.32801	3.4623	2.56483	1.03483	4.28923	5.01103	3.51411	1.76329	1.77426	4.08788	5.68659	4.78869	0.922202	0.949815	3.59859
ENSMUSG00000002249.19	Tead3	chr17	28331671	28350805	19134	-0.128196	0.163597	-0.78361	0.433269	0.738109	0.135701	0.16358	0.829569	0.406782	NA	20.9899	33.2319	26.4242	37.2539	16.0846	35.0772	44.512	28.2126	7.09706	17.3735	31.2763	22.9857	32.2771	18.0465	32.3874
ENSMUSG00000002250.15	Ppard	chr17	28232754	28301469	68715	-0.211087	0.10484	-2.01343	0.0440696	0.2473	0.0781896	0.104835	0.745832	0.455769	0.925059	2798.61	3506.5	3299.37	3633.29	3943.94	3287.24	3161.53	3038.15	2452.03	3180.37	2523.9	2876.09	3360.5	3140.09	3820.81
ENSMUSG00000004085.14	Map3k20	chr2	72285637	72442610	156973	0.807565	0.103	7.84047	4.4885e-15	3.05432e-12	0.767686	0.103207	7.43833	1.01968e-13	2.21596e-10	1796.55	1742.14	959.055	1539.83	2102.79	1430.65	1895.28	1821.48	1952.58	1751.66	1660.49	968.273	924.968	965.961	977.019
ENSMUSG00000002265.16	Peg3	chr7	6703892	6730431	26539	0.0588113	0.0880606	0.66785	0.504229	0.783379	0.327591	0.0880609	3.72005	0.000199187	0.0170423	40003.9	48931.5	38277.5	45309	54364.9	46119.1	49933.1	39146.8	42956.7	42072.5	35839.8	34804.2	43707.8	36337.1	38261.2
ENSMUSG00000002266.17	Zim1	chr7	6671269	6696450	25181	0.0715174	0.147087	0.486226	0.626807	0.850695	0.114932	0.147282	0.780351	0.435184	0.914798	377.629	392.857	352.607	330.111	521.141	303.168	417.008	313.865	302.512	540.622	353.517	302.645	334.759	396.073	376.953
ENSMUSG00000002274.12	Metrn	chr17	25794571	25797136	2565	-0.0330449	0.118413	-0.279065	0.780195	NA	-0.0313456	0.116866	-0.268218	0.788532	NA	3.97141	4.01827	4.59929	2.06966	3.21692	3.75828	7.02822	1.76329	3.54853	2.04394	8.52989	0.957738	1.8444	5.69889	9.89614
ENSMUSG00000002279.18	Lmf1	chr17	25579174	25662826	83652	0.0561925	0.0780835	0.719647	0.471743	0.761984	0.0112538	0.0781712	0.143964	0.885529	0.993206	6968.83	6741.64	6686.04	6963.37	6579.67	6593.27	6830.26	6990.56	6136.29	7104.74	7643.73	6494.42	6186.13	6597.41	7466.18
ENSMUSG00000002280.10	Narfl	chr17	25773776	25783332	9556	-0.00998398	0.110457	-0.0903878	0.927979	0.97705	0.122636	0.110602	1.10881	0.267513	0.825645	912.951	1014.04	920.158	1125.89	892.159	864.403	1173.71	886.934	946.57	842.103	976.199	766.19	1036.55	874.779	1003.11
ENSMUSG00000002289.15	Angptl4	chr17	33773750	33781575	7825	0.175141	0.118643	1.4762	0.13989	NA	0.0783315	0.116569	0.671974	0.5016	NA	5.89181	4.0524	2.56326	1.03483	3.21692	3.75828	8.19959	7.05316	7.98419	0	8.52989	1.91548	3.68881	2.84944	1.7993
ENSMUSG00000002297.15	Dbf4	chr5	8396973	8422716	25743	0.0308267	0.148329	0.207826	0.835365	0.943889	0.280722	0.148412	1.8915	0.0585573	0.497464	87.6516	111.211	85.2307	115.901	122.243	116.507	90.1955	112.85	93.1489	85.8455	58.7615	96.7315	94.9868	65.5372	83.6673
ENSMUSG00000002307.15	Daxx	chr17	33909414	33915589	6175	-0.0542132	0.106256	-0.510214	0.609902	0.843561	0.070047	0.106858	0.655513	0.512137	0.942991	251.741	277.812	262.346	226.628	278.8	291.893	313.927	239.807	242.187	272.866	252.106	229.857	275.738	263.099	280.69
ENSMUSG00000002308.15	Cd320	chr17	33843091	33849774	6683	-0.0541756	0.0817756	-0.662491	0.507657	0.785413	-0.0313051	0.0826462	-0.378784	0.704848	0.977646	494.862	502.885	514.845	500.858	514.707	473.543	522.431	507.827	479.938	539.6	452.084	500.897	477.701	533.796	546.986
ENSMUSG00000002319.15	Ipo4	chr14	55625400	55637895	12495	-0.0458306	0.082603	-0.55483	0.579011	0.827334	0.0313915	0.0828025	0.379114	0.704604	0.977621	1655.53	1752.72	1712.69	1852.35	1745.71	1596.01	1816.79	1609	1783.14	1709.76	1520.22	1572.61	1941.23	1654.58	1682.34
ENSMUSG00000002320.15	Tm9sf1	chr14	55635965	55643806	7841	-0.0106748	0.0805237	-0.132567	0.894536	0.966189	0.0128917	0.0811576	0.158848	0.873789	0.992432	697.246	710.138	703.169	730.59	645.528	706.556	757.876	745.871	732.771	646.907	663.436	667.543	761.739	693.365	690.031
ENSMUSG00000004233.14	Wars2	chr3	99141068	99239186	98118	0.301492	0.0787167	3.83009	0.000128096	0.00516221	0.0965476	0.0790936	1.22067	0.222209	0.794513	2545.35	2188.89	2038.87	2118.3	2388.03	2209.87	2039.35	2664.33	2609.94	2369.95	2537.17	2253.56	2082.33	2004.11	1815.49
ENSMUSG00000002325.14	Irf9	chr14	55603571	55610030	6459	-0.113009	0.133971	-0.843534	0.39893	0.712721	-0.0702496	0.134208	-0.523437	0.60067	0.961843	504.034	522.772	555.7	588.818	502.912	453.499	545.858	524.578	392.999	536.534	562.025	410.87	571.765	502.452	737.712
ENSMUSG00000002326.5	Gmpr2	chr14	55672235	55678750	6515	0.0397579	0.101631	0.391199	0.69565	0.884684	-0.0447964	0.102066	-0.438898	0.660735	0.971647	996.137	933.317	965.796	910.65	788.145	934.558	1099.92	946.004	925.279	949.41	1163.86	897.401	971.078	940.316	1054.39
ENSMUSG00000002329.6	Mdp1	chr14	55657879	55660508	2629	0.0880578	0.112211	0.784749	0.432601	0.737566	-0.262215	0.115641	-2.2675	0.0233598	0.329214	186.018	139.991	173.546	153.155	135.111	125.276	146.421	191.317	177.426	182.933	192.396	158.027	170.607	209.909	155.639
ENSMUSG00000002332.15	Dhrs1	chr14	55739020	55745690	6670	0.130994	0.0913876	1.43339	0.151747	0.464358	0.0968418	0.0918596	1.05424	0.291774	0.845986	955.16	930.362	865.085	1043.11	873.93	873.173	931.239	863.13	1004.23	978.025	975.251	824.612	1005.2	841.536	788.992
ENSMUSG00000004631.15	Sgce	chr6	4674350	4747207	72857	0.294268	0.0595252	4.94358	7.66994e-07	7.94335e-05	0.0894951	0.0597019	1.49903	0.133865	0.682249	8026.58	6930.6	6500.21	7039.95	6720.14	6935.27	7027.05	7634.16	7908.78	8331.1	8232.29	6812.39	6235.93	6887.11	6065.43
ENSMUSG00000002342.17	Tmem161a	chr8	70172356	70183681	11325	-0.0992125	0.0713774	-1.38997	0.164538	0.481876	0.000248996	0.071776	0.00346906	0.997232	0.999054	907.813	975.993	975.7	1011.03	925.4	932.052	1035.49	886.934	951.893	903.421	889.004	942.414	987.678	915.621	1057.09
ENSMUSG00000002343.11	Armc6	chr8	70220172	70234466	14294	-0.0531633	0.0838695	-0.633882	0.526158	0.796271	-0.178122	0.0852578	-2.08922	0.0366878	0.408243	495.506	450.864	514.892	458.43	442.863	435.96	466.205	474.325	468.406	542.666	496.629	452.052	524.733	537.595	545.187
ENSMUSG00000002345.17	Borcs8	chr8	70139499	70167488	27989	-0.177175	0.110508	-1.60327	0.108874	0.396895	0.0741934	0.110521	0.671304	0.502027	0.940876	1697.38	2072.23	1953.99	2073.8	2064.19	1886.65	2264.26	1500.56	2206.3	1390.9	1691.76	1879.08	2058.35	1961.37	1917.15
ENSMUSG00000002346.16	Slc25a42	chr8	70184340	70212305	27965	-0.24396	0.0852027	-2.86328	0.00419273	0.0610997	0.0216345	0.0852104	0.253895	0.799577	0.988088	2215	2699.66	2656.3	2859.24	2643.24	2710.97	2585.21	2168.85	2123.79	2415.94	2151.43	2252.6	2939.98	2565.45	2867.18
ENSMUSG00000002365.9	Snx9	chr17	5841328	5931033	89705	0.0691074	0.0934435	0.739564	0.459565	0.754437	0.403036	0.0934186	4.3143	1.60112e-05	0.0026162	2767.96	3564.53	2626.11	3376.65	3940.73	3323.57	3617.19	2751.61	2797.13	3126.21	2396.9	2464.26	2621.82	2414.43	3003.93
ENSMUSG00000002372.8	Ranbp3	chr17	56673225	56711769	38544	-0.0391779	0.0634884	-0.617089	0.537176	0.80346	0.0318736	0.063664	0.500653	0.616615	0.964064	2858.39	3007.75	2939.92	3195.55	2972.43	2817.45	3045.56	2942.05	2725.27	2846.19	2920.07	2743.92	2963.96	2910.23	3141.57
ENSMUSG00000002379.6	Ndufa11	chr17	56717762	56724248	6486	0.0526341	0.118169	0.445413	0.656021	0.866461	-0.0365549	0.119092	-0.306946	0.758884	0.984462	327.25	304.589	313.742	274.23	293.812	255.563	394.752	324.445	372.595	283.086	328.875	289.237	341.215	309.64	314.877
ENSMUSG00000002384.2	Bmp8b	chr4	123105165	123132099	26934	0.0348947	0.10929	0.319287	0.749509	0.909121	-0.0528068	0.110587	-0.477516	0.632995	0.968861	282.371	263.175	274.862	265.951	298.101	219.233	269.415	327.972	260.817	254.471	286.225	242.308	276.661	293.493	286.988
ENSMUSG00000002393.14	Nr2f6	chr8	71374123	71381960	7837	-0.00776316	0.105306	-0.0737199	0.941233	0.981377	0.141077	0.105698	1.33472	0.181967	0.756164	330.381	371.27	332.52	373.574	377.452	354.531	379.524	314.747	369.934	299.437	337.405	263.378	351.359	377.076	338.268
ENSMUSG00000002395.14	Use1	chr8	71366848	71369732	2884	0.0308192	0.120585	0.25558	0.798275	0.929471	-0.0201243	0.121834	-0.165179	0.868803	0.992432	199.558	191.593	194.669	174.886	202.666	179.144	209.675	193.08	229.767	170.669	204.717	151.323	213.029	196.612	217.715
ENSMUSG00000002396.8	Ocel1	chr8	71371298	71379361	8063	0.0490797	0.105107	0.466948	0.640537	0.85796	0.0659585	0.105662	0.624242	0.532468	0.947709	501.323	508.212	482.67	520.519	475.032	478.554	558.743	506.064	514.537	430.249	554.443	397.461	515.511	548.993	468.717
ENSMUSG00000002409.18	Dyrk1b	chr7	28179469	28187294	7825	-0.0446382	0.081157	-0.550022	0.582304	0.828667	0.0328762	0.0814078	0.403847	0.686326	0.976895	1352.05	1431.55	1397.13	1442.55	1467.99	1329.18	1486.47	1356.85	1291.66	1328.56	1431.13	1216.33	1469.07	1344.94	1558.19
ENSMUSG00000002413.15	Braf	chr6	39603237	39725463	122226	-0.132979	0.0629024	-2.11406	0.0345104	0.217457	-0.0758962	0.0629241	-1.20615	0.227758	0.800135	25209.5	26266.8	27740.8	25053.2	26108.5	25983.5	27921.9	24775.1	25264.6	26951.4	23846.7	26738.1	28704.5	26177.8	29342.9
ENSMUSG00000002416.13	Ndufb2	chr6	39592574	39603382	10808	0.111561	0.0906118	1.2312	0.218249	0.550781	-0.012366	0.091075	-0.135778	0.891997	0.993536	1317.37	1199.78	1210.89	1182.81	1124.85	1117.46	1374.02	1182.29	1319.17	1299.95	1468.09	1075.54	1227.45	1242.36	1298.19
ENSMUSG00000002428.12	Hltf	chr3	20057811	20118490	60679	0.0840737	0.081882	1.02677	0.30453	0.634008	0.0140522	0.0820884	0.171183	0.86408	0.992237	2985.78	2835.48	2805.83	2624.33	2874.85	3100.58	2742.18	3012.58	3069.48	2938.16	2922.91	3268.76	2623.66	2751.61	2579.29
ENSMUSG00000002455.14	Prpf6	chr2	181591868	181655660	63792	-0.0238812	0.0485344	-0.492047	0.622686	0.848565	0.0562021	0.0486589	1.15502	0.248081	0.815031	5381.24	5695.7	5472.71	5587.05	5698.24	5831.59	5665.91	5287.22	5321.02	5382.72	5534	5419.84	5210.44	5495.63	5764.95
ENSMUSG00000002458.13	Rgs19	chr2	181688419	181693977	5558	0.0252792	0.113583	0.222561	0.823877	0.939026	-0.0886217	0.115008	-0.770572	0.440961	0.916796	252.606	230.093	247.465	211.105	282.017	211.716	215.532	238.044	245.736	269.8	256.844	240.392	280.349	263.099	206.02
ENSMUSG00000002459.17	Rgs20	chr1	4909576	5070285	160709	-0.423441	0.128246	-3.3018	0.000960661	0.0233807	-0.271621	0.128248	-2.11793	0.034181	0.396383	27036.7	30753.7	38673.5	29830	31981.5	26170.1	35033.3	26504.9	23550.7	35370.4	22720.8	33772.7	40067.8	32744.9	48108.7
ENSMUSG00000002475.15	Abhd3	chr18	10644411	10706771	62360	-0.00346299	0.0830837	-0.0416808	0.966753	0.988778	-0.0493419	0.0833564	-0.591938	0.553892	0.952174	2029.76	1961.47	2034.46	1798.53	2178.93	2028.22	1840.22	2045.41	1881.61	2233	1959.03	1949.95	1968.9	1968.97	2250.02
ENSMUSG00000002477.4	Snrpd1	chr18	10617796	10628230	10434	0.0108346	0.107343	0.100935	0.919602	0.974115	-0.0954656	0.10818	-0.882473	0.377521	0.890543	486.763	448.126	482.695	459.464	369.946	472.29	490.804	504.301	484.374	433.315	525.062	422.362	568.999	446.413	493.008
ENSMUSG00000002486.15	Tchp	chr5	114707760	114722327	14567	0.0197319	0.0852805	0.231376	0.817023	0.937153	0.0232677	0.0863293	0.269523	0.787527	0.986412	415.033	415.736	408.89	428.42	446.079	398.377	390.066	422.308	408.081	410.832	418.912	404.165	369.803	403.671	457.921
ENSMUSG00000002489.15	Tiam1	chr16	89787111	89980080	192969	0.326498	0.103726	3.1477	0.0016456	0.0332726	0.186272	0.103749	1.7954	0.0725901	0.542666	20956.4	18793.3	16257.4	17514.5	18394.3	16009	23255.2	21306.7	19618.9	20952.4	21947.4	14940.7	14826.2	16468.8	18793.7
ENSMUSG00000002496.9	Tsc2	chr17	24595937	24632629	36692	-0.0994017	0.0764308	-1.30054	0.193415	0.521123	-0.0587481	0.0765183	-0.767764	0.442627	0.918198	5122.21	5276.32	5509.57	5649.14	5372.26	4555.03	5528.86	5066.81	5146.25	5353.08	4922.69	5018.55	5606.99	5600.11	5812.63
ENSMUSG00000002500.15	Rpl3l	chr17	24727820	24736143	8323	-0.185162	0.159738	-1.15916	0.24639	0.580053	-0.160251	0.160483	-0.998553	0.318011	0.858867	41.5688	42.5004	50.5837	49.6718	46.1092	42.5938	31.627	38.7924	36.3724	40.8788	50.2316	53.6333	55.3321	30.3941	62.9754
ENSMUSG00000002504.14	Slc9a3r2	chr17	24639282	24650305	11023	0.053085	0.129132	0.411092	0.681005	0.877703	0.217751	0.12928	1.68434	0.0921159	0.597267	431.131	495.418	411.893	476.022	612.287	444.729	448.635	406.438	463.97	485.436	368.681	303.603	505.367	411.27	427.333
ENSMUSG00000002524.15	Puf60	chr15	76070184	76080946	10762	0.0553467	0.110138	0.50252	0.615302	0.845419	0.0521273	0.110554	0.471512	0.637275	0.969966	653.515	651.876	625.32	688.162	543.659	602.577	773.104	684.156	600.588	660.193	669.122	535.376	734.073	583.186	648.647
ENSMUSG00000002546.16	Golga2	chr2	32287384	32307921	20537	0.0323857	0.0679056	0.476922	0.633418	0.854141	0.130541	0.0681764	1.91476	0.0555237	0.484942	1452.37	1558.64	1418.62	1687.81	1550.56	1421.88	1574.32	1460.88	1431.83	1416.45	1500.31	1318.81	1479.21	1436.12	1440.34
ENSMUSG00000002550.16	Uck1	chr2	32255002	32260159	5157	0.076103	0.117092	0.64994	0.515731	0.789717	0.121982	0.117558	1.03763	0.299443	0.851562	401.693	416.373	377.624	509.136	416.055	324.464	415.836	418.781	387.677	370.975	429.338	319.885	423.291	356.18	411.139
ENSMUSG00000002565.16	Scin	chr12	40059769	40134228	74459	-0.361916	0.16647	-2.17406	0.0297005	0.200274	0.0793945	0.166368	0.477222	0.633204	NA	18.9301	34.5135	31.1144	25.8707	42.8923	38.8355	30.4556	23.8044	14.1941	23.5053	14.2165	27.7744	33.1993	43.6915	19.7923
ENSMUSG00000002578.17	Ikzf4	chr10	128630843	128645991	15148	0.0866269	0.0904605	0.957621	0.338254	0.661801	-0.209259	0.0916694	-2.28276	0.0224446	0.322811	765.236	611.534	717.188	634.351	687.348	593.808	530.63	790.835	758.498	742.972	768.638	749.909	638.164	797.844	682.833
ENSMUSG00000002580.7	Mien1	chr11	98437708	98438991	1283	0.0121048	0.15201	0.0796315	0.93653	0.979916	-0.154712	0.153384	-1.00866	0.313138	0.856466	82.4853	69.9881	81.4824	57.9505	53.6153	67.649	100.738	72.2948	102.02	94.0212	61.6048	79.4923	78.3872	81.684	86.3663
ENSMUSG00000002588.12	Pon1	chr6	5168090	5193946	25856	0.377527	0.152215	2.48022	0.0131303	0.124655	0.339415	0.153515	2.21095	0.027039	0.355527	61.2629	59.4485	42.0182	50.7067	54.6876	72.66	59.7398	62.5968	55.8893	59.2743	67.2914	43.0982	49.7989	26.5948	48.581
ENSMUSG00000002602.16	Axl	chr7	25757273	25788705	31432	-0.0424685	0.156418	-0.271506	0.786002	0.925653	-0.135303	0.156062	-0.866982	0.385952	0.895465	48.3334	39.3879	52.6723	24.8359	30.0246	30.0662	72.6249	53.7803	24.8397	26.5712	88.1422	36.394	35.0437	30.3941	108.857
ENSMUSG00000002603.15	Tgfb1	chr7	25687002	25705077	18075	0.0610938	0.154842	0.394556	0.69317	NA	0.0995122	0.153954	0.646376	0.518036	NA	11.7742	12.8518	10.1912	8.27864	12.8677	15.0331	15.2278	2.64493	13.307	11.2417	19.9031	9.57738	10.1442	6.6487	14.3944
ENSMUSG00000002608.8	Ccdc97	chr7	25711106	25719088	7982	-0.0868863	0.101262	-0.858034	0.390873	0.706192	-0.0882507	0.101546	-0.869068	0.38481	0.894849	1143.01	1141.6	1222.03	1200.4	1024.05	1069.86	1272.11	1171.71	999.798	1146.65	1253.89	1045.85	1205.32	1211.01	1425.94
ENSMUSG00000002617.14	Zfp40	chr17	23173869	23193252	19383	-0.221928	0.0760644	-2.91764	0.00352694	0.0545378	-0.172775	0.0762312	-2.26647	0.0234228	0.329252	2593.08	2688.5	3051.59	2727.81	2484.53	2757.32	2784.35	2439.51	2693.33	2600.91	2638.58	3117.44	3288.57	3157.18	2643.17
ENSMUSG00000002625.9	Akap8l	chr17	32321425	32350581	29156	-0.0504752	0.0639136	-0.789742	0.429679	0.735791	0.0883174	0.0639443	1.38116	0.16723	0.736421	10640.3	11759.4	11034.7	12247.2	11652.8	11045.6	12092	11188.1	10354.6	10191.1	10827.3	10867.5	10130.4	11451	11690
ENSMUSG00000005470.8	Asf1b	chr8	83955507	83970197	14690	0.593925	0.145921	4.07019	4.69745e-05	0.00239606	0.0664054	0.15009	0.442436	0.658174	0.971647	78.3638	47.8527	45.1396	43.4629	63.2661	41.341	43.3407	83.7562	64.7606	78.6917	86.2467	43.0982	45.1879	43.6915	48.581
ENSMUSG00000002635.11	Pdcd2l	chr7	34184499	34196661	12162	-0.0606549	0.0806112	-0.752438	0.451788	0.751557	-0.0424608	0.0812187	-0.522795	0.601117	0.961843	743.023	753.775	777.197	759.565	659.468	785.48	810.588	782.019	730.997	711.291	747.787	715.43	835.515	776.948	780.895
ENSMUSG00000002658.9	Gtf2f1	chr17	57003405	57011288	7883	0.0575427	0.0862001	0.667548	0.504422	0.783396	0.0258989	0.0868869	0.298076	0.765645	0.984462	716.945	699.973	686.955	748.182	648.745	643.918	759.048	724.712	715.915	715.379	711.772	677.121	723.928	749.404	597.367
ENSMUSG00000002660.7	Clpp	chr17	56990264	56996371	6107	0.159151	0.0953899	1.66842	0.0952316	0.372475	0.0511515	0.096117	0.53218	0.594602	0.961049	726.268	669.375	643.492	666.43	589.769	637.654	783.646	715.895	767.369	641.797	780.011	622.53	667.674	595.534	688.231
ENSMUSG00000002661.14	Alkbh7	chr17	56997339	56999322	1983	0.0238402	0.125537	0.189905	0.849384	0.948917	-0.0474913	0.127403	-0.372766	0.709323	0.97885	124.562	117.508	121.893	107.622	97.5799	127.781	137.05	114.614	110.004	126.724	146.904	112.055	126.342	118.727	130.449
ENSMUSG00000002664.2	Pspn	chr17	56999457	57000018	561	0.0699778	0.130986	0.534237	0.593177	NA	0.135954	0.129599	1.04904	0.29416	NA	4.63192	5.80445	3.51775	9.31347	4.28923	3.75828	5.85685	7.05316	1.77426	3.06591	6.63436	4.78869	5.53321	2.84944	0.899649
ENSMUSG00000002668.7	Dennd1c	chr17	57066056	57078510	12454	0.0341427	0.166717	0.204794	0.837733	0.944406	0.0276973	0.166719	0.166132	0.868053	NA	31.1786	31.0703	29.6346	16.5573	32.1692	45.0993	30.4556	27.331	31.9367	39.8568	25.5897	24.9012	21.2106	25.645	46.7817
ENSMUSG00000002679.14	Med6	chr12	81573557	81595008	21451	0.0238401	0.0706076	0.337642	0.735633	0.902981	-0.0247027	0.0711581	-0.347152	0.728477	0.982166	1294.43	1249.91	1272.33	1274.91	1125.92	1255.26	1343.56	1324.23	1231.34	1235.56	1386.58	1309.23	1263.42	1267.05	1249.61
ENSMUSG00000006567.11	Atp7b	chr8	21992785	22060305	67520	0.4132	0.10348	3.99304	6.52309e-05	0.00313949	0.258024	0.104545	2.46807	0.0135842	0.249303	483.194	428.115	350.525	422.211	503.984	400.883	385.381	497.247	491.471	523.249	420.808	372.56	360.581	367.578	301.382
ENSMUSG00000002699.13	Lcp2	chr11	34046920	34092295	45375	-0.0846902	0.165486	-0.511765	0.608816	0.842884	-0.0949932	0.165663	-0.573414	0.566365	0.954074	64.6133	63.7616	71.582	50.7067	61.1215	58.8797	84.3386	45.8455	54.115	55.1864	103.306	54.5911	51.6433	71.2361	108.857
ENSMUSG00000002718.14	Cse1l	chr2	166906040	166946389	40349	-0.0414283	0.0556309	-0.7447	0.456453	0.753738	0.0525759	0.0557988	0.942241	0.346069	0.877257	3121.78	3339.15	3215.86	3265.92	3353.1	3441.33	3296.23	2958.8	3335.62	2989.26	3203.45	3288.87	3190.82	3216.07	3167.66
ENSMUSG00000002728.14	Naa20	chr2	145902099	145916425	14326	0.0105656	0.0709462	0.148925	0.881613	0.961991	-0.0126463	0.0713691	-0.177196	0.859354	0.992237	1531.2	1505.74	1519.59	1472.56	1469.06	1434.41	1646.95	1555.22	1477.07	1448.13	1644.37	1514.18	1631.37	1463.66	1469.13
ENSMUSG00000002731.6	Prkra	chr2	76629898	76648015	18117	0.16285	0.102583	1.58749	0.112401	0.403423	0.143082	0.103346	1.3845	0.166206	0.735006	445.296	437.821	392.387	440.838	545.804	374.575	390.066	419.663	450.663	444.557	466.301	379.264	389.169	399.872	401.243
ENSMUSG00000002732.14	Fkbp7	chr2	76663044	76673116	10072	0.186661	0.111325	1.67672	0.0935981	0.368958	-0.0624874	0.113876	-0.548731	0.58319	0.958546	209.303	171.495	180.225	164.538	169.424	171.628	180.391	169.276	230.654	226.877	210.404	174.308	180.752	164.318	201.521
ENSMUSG00000002733.8	Plekha3	chr2	76675281	76696828	21547	0.0745114	0.0733229	1.01621	0.309529	0.638175	0.00602512	0.0738663	0.0815679	0.93499	0.996145	1328.53	1264.63	1258.69	1214.89	1219.21	1270.3	1354.1	1316.3	1446.91	1181.4	1369.52	1274.75	1294.77	1212.91	1252.31
ENSMUSG00000002741.9	Ykt6	chr11	5955693	5967780	12087	0.134528	0.0712766	1.88741	0.0591058	0.290045	0.0955295	0.0717115	1.33214	0.182815	0.756751	1568.53	1524.6	1422.42	1656.76	1421.88	1478.26	1541.52	1508.49	1680.23	1467.55	1617.84	1379.14	1502.27	1422.82	1385.46
ENSMUSG00000002748.7	Baz1b	chr5	135187264	135246129	58865	-0.0596438	0.0570665	-1.04516	0.295948	0.626872	-0.0110472	0.0571414	-0.193331	0.846699	0.991148	8629.08	8934.29	9004.7	9240	8283.57	8978.52	9235.08	8904.61	8284.92	8611.12	8715.65	9038.17	8828.24	8639.51	9512.89
ENSMUSG00000002763.16	Pex6	chr17	46711463	46725541	14078	-0.101985	0.0955536	-1.0673	0.285835	0.618048	-0.0710409	0.0959572	-0.740339	0.459094	0.926928	788.561	806.686	851.83	848.561	805.302	699.039	873.842	776.729	753.175	872.762	751.578	712.557	900.991	883.328	910.445
ENSMUSG00000002767.13	Mrpl2	chr17	46646229	46650139	3910	0.0824479	0.122195	0.674723	0.499852	0.780521	0.143694	0.123209	1.16627	0.243507	0.810576	149.498	157.092	139.583	177.991	134.038	145.32	171.02	147.235	152.587	164.537	133.635	131.21	165.996	140.573	120.553
ENSMUSG00000002768.7	Mea1	chr17	46681137	46683105	1968	0.111994	0.135413	0.827052	0.408207	0.719466	0.157646	0.136549	1.1545	0.248295	0.815031	98.6267	102.909	89.2875	96.2392	82.5676	103.979	128.851	89.9277	100.246	99.1311	105.202	85.2387	75.6205	88.3328	107.958
ENSMUSG00000002769.8	Gnmt	chr17	46725664	46729168	3504	0.0573905	0.143386	0.400252	0.688971	0.880911	0.0640208	0.145074	0.441299	0.658997	0.971647	57.5885	57.7688	54.6589	71.4033	55.7599	48.8576	55.0544	56.4252	62.0992	52.1205	59.7092	49.8024	60.8653	51.29	56.6779
ENSMUSG00000002771.12	Grin2d	chr7	45831883	45878378	46495	0.0517415	0.0981807	0.527003	0.598191	0.837428	-0.098151	0.0986003	-0.995443	0.319521	0.86006	1342.67	1196.33	1290.53	1120.72	1457.26	1107.44	1099.92	1180.52	1466.43	1316.3	1407.43	1309.23	1341.8	1331.64	1179.44
ENSMUSG00000002778.14	Kdelr1	chr7	45872772	45883732	10960	0.0527673	0.0824524	0.639973	0.52219	0.793501	-0.0280592	0.0831291	-0.337538	0.735712	0.983967	925.406	871.491	890.038	849.595	896.448	818.051	921.868	844.615	986.491	856.411	1014.11	843.767	940.646	933.668	842.071
ENSMUSG00000002781.19	Tmem143	chr7	45896941	45917413	20472	0.310162	0.0925335	3.35189	0.000802633	0.0206412	0.094021	0.0932037	1.00877	0.313085	0.856466	1119.74	950.112	885.403	1062.77	930.762	875.678	931.239	1078.25	979.394	1145.63	1275.69	948.161	810.615	931.768	851.068
ENSMUSG00000002791.16	Pdxk-ps	chr17	32076083	32107350	31267	0.0388757	0.16039	0.242382	0.808484	0.933148	-0.107828	0.161743	-0.666661	0.504989	0.941246	38.693	32.516	36.9667	41.3932	33.2415	23.8024	31.627	30.8576	36.3724	43.9447	43.5972	42.1405	33.1993	27.5446	44.9824
ENSMUSG00000002797.9	Ggct	chr6	54982580	54992950	10370	0.292172	0.0844038	3.4616	0.000536981	0.0153745	-0.0922703	0.0865008	-1.0667	0.286108	0.841742	589.782	443.424	474.95	433.594	405.332	450.993	483.776	578.359	630.751	527.336	622.682	501.855	453.723	469.208	475.015
ENSMUSG00000002799.6	Jag2	chr12	112907819	112929776	21957	0.0586077	0.0846806	0.692104	0.488872	0.773858	0.00731325	0.0853718	0.0856636	0.931734	0.995991	786.468	756.644	753.041	837.177	770.988	755.413	662.995	786.427	827.694	759.324	772.429	689.571	815.226	792.145	715.221
ENSMUSG00000002803.14	Btbd6	chr12	112976482	112978945	2463	0.171586	0.093854	1.82823	0.0675154	0.310135	0.0330098	0.0952524	0.346551	0.728929	0.982393	422.138	379.871	370.361	367.365	362.44	363.3	426.379	382.634	430.259	455.799	419.86	345.743	417.757	375.177	342.766
ENSMUSG00000002804.4	Nudt14	chr12	112934291	112942124	7833	0.13378	0.154225	0.867437	0.385702	0.702729	0.143436	0.155138	0.924568	0.355191	0.881063	62.1507	62.3958	54.2243	85.8909	66.483	53.8686	43.3407	62.5968	48.7923	62.3402	74.8735	57.4643	52.5655	47.4907	59.3768
ENSMUSG00000002808.7	Epdr1	chr13	19591706	19619927	28221	-0.121864	0.0666091	-1.82955	0.0673179	0.310135	0.0539541	0.0666679	0.809297	0.418345	0.911117	3793.3	4307.96	4142.41	4253.15	4073.69	4655.25	4249.73	3661.47	3736.6	4094.01	3681.12	4299.29	4358.33	3995.87	3916.17
ENSMUSG00000002812.4	Flii	chr11	60714123	60727263	13140	0.0119162	0.0894169	0.133265	0.893983	0.966051	0.100028	0.0897403	1.11464	0.265003	0.824661	839.503	896.182	831.778	944.8	995.1	796.755	848.072	819.929	840.114	868.674	829.295	708.726	892.691	871.93	853.767
ENSMUSG00000002814.15	Top3a	chr11	60740058	60777365	37307	0.289622	0.108283	2.67467	0.00748038	0.0883788	0.0977383	0.108887	0.897615	0.369391	0.887884	848.817	730.198	676.084	687.127	806.374	747.897	679.394	865.775	896.003	672.456	961.034	770.021	707.329	593.634	633.353
ENSMUSG00000002820.6	Atg4d	chr9	21265293	21277772	12479	0.0819798	0.0825609	0.992962	0.320728	0.647482	-0.0253634	0.0829745	-0.305677	0.75985	0.984462	1646.67	1520.16	1549.28	1614.33	1446.54	1441.93	1577.83	1623.11	1499.25	1621.87	1842.46	1441.4	1732.82	1517.8	1505.11
ENSMUSG00000002825.7	Qtrt1	chr9	21411837	21420274	8437	-0.0788331	0.104772	-0.752424	0.451796	0.751557	-0.0389352	0.105052	-0.370627	0.710915	0.97885	903.941	932.504	960.961	955.148	837.471	900.733	1036.66	953.058	825.033	939.19	898.482	784.387	913.902	985.907	1159.65
ENSMUSG00000002831.13	Plin4	chr17	56100591	56109803	9212	-0.00275581	0.100109	-0.0275282	0.978038	0.992545	-0.0294017	0.100917	-0.291344	0.770789	0.984875	450.744	441.203	451.318	472.917	417.127	410.905	463.862	440.822	416.065	459.886	486.204	389.799	447.268	429.316	538.89
ENSMUSG00000002833.11	Hdgfl2	chr17	56079634	56100607	20973	-0.104517	0.074451	-1.40383	0.160368	0.476609	-0.032394	0.074599	-0.434242	0.664112	0.972163	2696.47	2842.16	2910.4	2968.93	2784.78	2731.01	2883.91	2843.3	2441.39	2746.03	2755.15	2695.07	2757.38	2955.82	3233.34
ENSMUSG00000002835.8	Chaf1a	chr17	56040416	56068026	27610	0.251039	0.132481	1.89491	0.0581043	0.28771	0.0362561	0.133807	0.270959	0.786423	0.986068	220.903	183.552	178.223	222.488	154.412	162.859	194.447	230.109	230.654	171.691	251.158	222.195	167.841	168.117	154.74
ENSMUSG00000002844.8	Adprh	chr16	38445399	38452689	7290	0.0367601	0.0995118	0.369404	0.711826	0.891376	0.103234	0.099968	1.03267	0.30176	0.852888	544.282	572.909	529.37	587.783	534.009	517.389	652.453	529.868	577.523	518.139	551.6	556.446	573.61	554.692	432.731
ENSMUSG00000002845.14	Tmem39a	chr16	38558698	38592162	33464	-0.0608166	0.054459	-1.11674	0.264106	0.596519	0.0250643	0.0546726	0.458443	0.646634	0.971403	2637.15	2803.93	2753.86	2742.3	2852.34	2789.89	2831.2	2748.09	2587.76	2611.13	2601.62	2647.19	2837.61	2632.89	2897.77
ENSMUSG00000002846.9	Timmdc1	chr16	38498347	38522663	24316	-0.00309631	0.0855298	-0.0362016	0.971122	0.990226	0.00951354	0.0857178	0.110987	0.911627	0.994941	2250.46	2271.98	2255.76	2300.43	2108.15	2267.49	2411.85	2320.49	2027.98	2047.01	2606.36	2334.97	2087.86	2253.91	2346.28
ENSMUSG00000002847.6	Pla1a	chr16	38396119	38433145	37026	0.231172	0.162967	1.41853	0.156037	NA	0.202751	0.162196	1.25004	0.211286	NA	16.6139	16.0004	10.8821	10.3483	13.94	16.2859	23.4274	7.9348	23.0654	18.3955	17.0598	8.61964	11.0664	8.54833	15.294
ENSMUSG00000002870.8	Mcm2	chr6	88883474	88898780	15306	0.0666224	0.163758	0.406834	0.68413	0.878745	-0.049918	0.164443	-0.303558	0.761465	0.984462	41.4147	36.0278	38.408	37.2539	47.1815	35.0772	24.5988	43.2006	47.9051	34.747	39.8062	34.4786	59.0209	31.3439	28.7888
ENSMUSG00000002871.14	Tpra1	chr6	88902251	88912238	9987	0.101355	0.103846	0.976015	0.329057	0.654581	0.0737134	0.104452	0.705717	0.480364	0.935156	561.825	549.906	519.516	562.947	556.527	471.037	609.112	520.17	686.64	506.897	533.592	520.052	558.854	504.352	494.807
ENSMUSG00000002881.14	Nab1	chr1	52457294	52500679	43385	-0.016369	0.120519	-0.135821	0.891963	0.965476	0.343848	0.120493	2.85369	0.0043215	0.132274	2084.68	2800.34	2113.15	2677.1	2922.04	3418.78	2183.43	2154.74	2291.46	2050.07	1842.46	2234.4	2346.08	2232.06	1640.06
ENSMUSG00000002885.14	Adgre5	chr8	83723251	83741326	18075	0.230102	0.149187	1.54238	0.122982	0.422124	0.0336542	0.150565	0.22352	0.823131	0.989198	107.146	88.7749	85.7718	76.5774	77.2061	87.6931	113.623	88.1644	90.4875	126.724	123.21	82.3655	63.6319	86.4331	110.657
ENSMUSG00000002897.5	Il17ra	chr6	120463247	120487559	24312	-0.354146	0.157309	-2.25127	0.0243683	0.1786	-0.0831316	0.157311	-0.528455	0.597183	0.961843	715.922	952.307	1036.94	865.118	851.411	1398.08	694.622	644.482	883.583	747.06	588.562	1121.51	1345.49	1094.19	586.571
ENSMUSG00000002900.16	Lamb1	chr12	31265234	31329644	64410	0.063906	0.0939168	0.680453	0.496218	0.779213	-0.0837161	0.0941238	-0.889425	0.373775	0.890303	2957.87	2644.05	2817.91	2744.37	2599.27	2489.23	2743.35	2812.45	2831.73	2588.65	3598.67	2876.09	2547.12	2823.8	3024.62
ENSMUSG00000006777.7	Krt23	chr11	99477974	99493137	15163	0.606656	0.165665	3.66195	0.000250301	0.00867575	0.271983	0.166316	1.63534	0.101977	NA	39.8781	27.1226	18.6143	18.6269	30.0246	37.5828	22.256	40.5556	42.5823	33.725	42.6495	12.4506	27.6661	19.9461	14.3944
ENSMUSG00000002910.11	Arrdc2	chr8	70835129	70839720	4591	0.103307	0.152419	0.677784	0.497909	0.78023	0.10361	0.153258	0.67605	0.499009	0.940135	78.7445	78.8645	70.9937	84.8561	70.7722	80.1766	79.6531	83.7562	85.1647	79.7137	66.3436	50.7601	77.465	53.1896	102.56
ENSMUSG00000002930.6	Ppp1r17	chr6	56017497	56032689	15192	0.0254288	0.0798078	0.318625	0.750011	NA	0.0546858	0.0787076	0.694797	0.487183	NA	1.609	2.17099	1.14274	2.06966	5.36153	1.25276	0	2.64493	0	0	3.79106	0	0.922202	0.949815	2.69895
ENSMUSG00000002944.15	Cd36	chr5	17781690	17888801	107111	-0.190895	0.166377	-1.14736	0.251231	0.584624	-0.368178	0.166125	-2.21627	0.026673	0.353881	35.9024	27.062	47.2225	17.5921	21.4461	37.5828	31.627	50.2537	31.0496	35.7689	26.5374	83.3232	28.5883	43.6915	33.287
ENSMUSG00000002948.19	Map2k7	chr8	4238740	4247897	9157	0.0307407	0.0857682	0.358416	0.720032	0.895367	-0.0196554	0.0859055	-0.228802	0.819023	0.988667	3892.88	3749.06	3804.72	4034.8	3408.86	3347.37	4205.22	3785.78	4141.13	3614.71	4029.9	3568.53	4133.31	3705.23	3811.81
ENSMUSG00000002949.15	Timm44	chr8	4259731	4275913	16182	0.0880971	0.0677204	1.30089	0.193295	0.521098	0.0969221	0.067899	1.42745	0.153452	0.719277	3433.68	3455.73	3221.8	3672.61	3271.61	3179.5	3699.19	3505.42	3576.03	3184.46	3468.82	3120.31	3205.57	3291.11	3270.22
ENSMUSG00000002957.11	Ap2a2	chr7	141562173	141633011	70838	-0.148786	0.0606591	-2.45282	0.014174	0.130205	-0.0766847	0.0607255	-1.26281	0.206658	0.777544	7990.42	8414.84	8891.07	8961.63	7939.36	8179.26	8579.11	8379.15	7982.41	7778.21	7821.91	8649.33	8832.85	8535.03	9547.07
ENSMUSG00000002963.17	Pnkp	chr7	44857139	44862992	5853	0.110521	0.0877975	1.25881	0.208098	0.538552	0.115047	0.0887798	1.29587	0.195019	0.766752	421.441	422.818	387.939	430.489	407.476	387.102	466.205	400.267	463.97	428.205	393.323	361.067	397.469	403.671	389.548
ENSMUSG00000002968.8	Med25	chr7	44876765	44892712	15947	-0.103551	0.104434	-0.991546	0.321419	0.648043	-0.0259638	0.104599	-0.248222	0.803963	0.988088	1278.5	1357.49	1385.41	1480.84	1265.32	1138.76	1545.04	1240.47	1122.22	1434.85	1316.45	1212.5	1453.39	1354.44	1521.31
ENSMUSG00000002980.14	Bcam	chr7	19756131	19771016	14885	-0.548825	0.164677	-3.33274	0.000859963	NA	-0.202747	0.164818	-1.23013	0.21865	NA	9.77541	18.7651	25.0057	22.7663	8.57845	23.8024	19.9133	6.17151	13.307	9.19773	10.4254	17.2393	33.1993	18.9963	30.5881
ENSMUSG00000002981.10	Clptm1	chr7	19631571	19665033	33462	-0.0296665	0.0734408	-0.403952	0.686248	0.879676	0.0019285	0.0736096	0.026199	0.979099	0.998383	2932.64	3001.3	2996.88	3047.57	2742.96	2875.08	3339.57	3031.09	2774.06	2858.45	3066.97	2862.68	3219.41	2983.37	2922.06
ENSMUSG00000002983.17	Relb	chr7	19606217	19629438	23221	-0.0502385	0.143509	-0.350073	0.726284	0.898076	-0.149084	0.144357	-1.03274	0.301724	0.852888	168.429	153.579	176.398	145.911	204.811	162.859	100.738	185.145	167.668	151.252	169.65	143.661	155.852	193.762	212.317
ENSMUSG00000002984.17	Tomm40	chr7	19701313	19715438	14125	-0.12669	0.0840422	-1.50746	0.131693	0.436015	-0.0496961	0.084206	-0.590173	0.555075	0.952313	1961.12	2075.96	2154.4	2231.09	1990.2	1844.06	2238.49	1894.65	1946.37	2142.05	1861.41	1958.57	2199.45	2095.29	2364.28
ENSMUSG00000002985.16	Apoe	chr7	19696109	19699188	3079	0.036896	0.166216	0.221976	0.824333	0.939062	-0.0199736	0.166294	-0.120111	0.904396	0.994941	107.254	99.7344	102.216	93.1347	66.483	77.671	161.649	125.194	82.5033	98.1091	123.21	70.8726	100.52	67.4368	170.034
ENSMUSG00000002992.17	Apoc2	chr7	19671579	19677941	6362	-0.0301061	0.125633	-0.239636	0.810612	NA	0.0337633	0.124158	0.271939	0.785669	NA	3.47761	4.60114	3.96614	4.13932	2.14461	6.26379	5.85685	2.64493	2.6614	1.02197	7.58212	2.87321	1.8444	6.6487	4.49824
ENSMUSG00000002996.17	Hbp1	chr12	31926254	31950535	24281	0.0772335	0.0508617	1.5185	0.128889	0.431235	0.0385804	0.0511542	0.754198	0.45073	0.922779	3616.39	3518.54	3423.15	3405.63	3522.53	3417.53	3728.47	3560.96	3562.72	3596.31	3745.57	3422	3456.41	3326.25	3487.94
ENSMUSG00000002997.15	Prkar2b	chr12	31958476	32061296	102820	0.0436763	0.0710993	0.614301	0.539016	0.804197	-0.134427	0.0711526	-1.88927	0.0588554	0.498653	19567.5	17188.7	18955.3	16513.8	16073.9	18066	18101.2	19959.5	18100.2	19088.4	21121.9	19612.6	17307	19602.3	19299.3
ENSMUSG00000003031.14	Cdkn1b	chr6	134920401	134925513	5112	0.292741	0.130102	2.25009	0.0244435	0.178726	0.016146	0.131359	0.122915	0.902174	0.994475	290.001	229.387	225.98	199.722	206.955	236.771	274.1	247.742	322.916	271.844	317.501	171.435	283.116	229.855	219.514
ENSMUSG00000003032.8	Klf4	chr4	55527143	55532466	5323	-0.0606124	0.136044	-0.445534	0.655934	NA	-0.0871589	0.133781	-0.651504	0.514721	NA	4.42941	4.0342	5.36284	2.06966	4.28923	6.26379	3.51411	4.40822	2.6614	3.06591	7.58212	4.78869	2.76661	7.59852	6.29754
ENSMUSG00000003033.15	Ap1m1	chr8	72240018	72257385	17367	-0.0824939	0.0813589	-1.01395	0.310606	0.63933	-0.0786373	0.0815247	-0.964584	0.334753	0.869851	2869.63	2877.58	3049.82	2866.48	2781.56	2715.98	3146.3	2793.93	2751	2932.03	3001.57	2710.4	3020.21	2967.22	3501.43
ENSMUSG00000003037.16	Rab8a	chr8	72161200	72183904	22704	0.200187	0.074229	2.69688	0.00699922	0.0850421	0.0563083	0.0748003	0.752782	0.451581	0.923363	1558.7	1403.33	1346.33	1362.87	1400.43	1425.64	1424.39	1683.06	1395.46	1491.05	1665.22	1282.41	1364.86	1302.2	1435.84
ENSMUSG00000003038.15	Hmgn2	chr4	133964738	133968650	3912	0.116797	0.100033	1.16759	0.242974	0.575869	-0.100259	0.10162	-0.98661	0.323834	0.86223	400.368	338.625	366.167	369.434	304.535	342.003	338.526	354.421	451.55	369.953	425.547	366.814	384.558	389.424	323.874
ENSMUSG00000003039.9	Fam32a	chr8	72219730	72224418	4688	0.00867825	0.129011	0.0672674	0.946369	0.982891	0.0109507	0.129552	0.0845276	0.932637	0.996145	305.713	306.938	303.7	284.578	242.341	311.937	388.895	345.605	344.207	253.449	279.591	253.801	343.981	303.941	313.078
ENSMUSG00000003053.17	Cyp2c29	chr19	39269405	39330713	61308	-0.261932	0.166711	-1.57117	0.116143	NA	-0.322993	0.166506	-1.93983	0.0524003	NA	13.7426	12.3025	19.5252	13.4528	13.94	11.2748	10.5423	14.988	11.5327	13.2856	15.1642	18.197	19.3662	18.0465	22.4912
ENSMUSG00000003062.13	Stard3nl	chr13	19357676	19395795	38119	0.0213071	0.0620079	0.343619	0.731132	0.900665	0.0326059	0.0621871	0.52432	0.600056	0.961843	3814.31	3845.45	3756.57	4086.54	3577.21	3874.78	3843.26	3831.63	3940.64	3870.2	3614.78	3832.87	3896.3	3799.26	3497.83
ENSMUSG00000003068.16	Stk11	chr10	80115803	80130682	14879	-0.161922	0.0962093	-1.68302	0.0923712	0.366138	-0.00750048	0.0964033	-0.0778031	0.937985	0.996145	770.666	866.836	871.825	890.989	856.773	775.458	944.124	715.895	807.29	775.675	783.802	704.895	959.09	897.575	925.739
ENSMUSG00000003070.6	Efna2	chr10	80179482	80190010	10528	0.0215024	0.140552	0.152985	0.87841	0.960837	-0.141726	0.142515	-0.994464	0.319997	0.86006	96.3597	82.9914	94.412	71.4033	87.9291	78.9238	93.7096	80.2296	94.036	88.9114	122.262	71.8304	106.975	102.58	96.2624
ENSMUSG00000003072.15	Atp5d	chr10	80138632	80145818	7186	-0.00011618	0.100217	-0.00115928	0.999075	0.999466	0.0714781	0.100435	0.711686	0.476659	0.934688	1098.75	1160.5	1098.6	1168.32	1278.19	997.196	1198.31	1035.93	1133.75	1160.96	1064.34	900.274	1272.64	1129.33	1092.17
ENSMUSG00000003099.11	Ppp5c	chr7	17004640	17027924	23284	-0.0506232	0.079132	-0.639732	0.522347	0.793595	-0.054417	0.0793742	-0.685576	0.492981	0.937591	2113.37	2107.74	2194.27	2200.05	2099.58	2125.93	2005.38	2173.25	2310.09	1957.07	2013.05	2086.91	2449.37	2245.36	1995.42
ENSMUSG00000003119.14	Cdk12	chr11	98203059	98278504	75445	0.122546	0.0922678	1.32815	0.184128	0.508264	0.0465954	0.0923258	0.504684	0.613781	0.963652	8860.25	8366.16	8076.44	7964.05	8750.02	9105.05	7645.53	9037.74	9138.35	8124.66	9140.25	9344.65	7300.15	8582.52	7078.44
ENSMUSG00000003123.15	Lipe	chr7	25379527	25398710	19183	0.161507	0.0932185	1.73257	0.0831729	0.34621	0.0375447	0.0935638	0.401274	0.688218	0.977018	1683.03	1531.5	1489.31	1624.68	1813.27	1420.63	1267.42	1749.18	1706.84	1588.14	1687.97	1422.24	1505.03	1549.15	1480.82
ENSMUSG00000003131.7	Pafah1b2	chr9	45962859	46012690	49831	-0.0656106	0.0755482	-0.86846	0.385142	0.702413	-0.0296669	0.0756963	-0.39192	0.695117	0.977018	3143.77	3228.79	3299	2988.59	2981.01	3253.41	3692.16	3368.76	3102.3	2955.54	3148.48	3277.38	3386.32	3286.36	3245.93
ENSMUSG00000003134.10	Tbc1d8	chr1	39371492	39478755	107263	0.0336088	0.107216	0.313469	0.753925	0.911243	0.0461944	0.107226	0.430812	0.666605	0.973277	26041.9	26300.6	25363.7	28009.7	22197.8	24237.1	30757.8	27600.8	24698.6	23859.9	28008.4	23670.5	23546.6	23515.5	30722.1
ENSMUSG00000003135.15	Cnot11	chr1	39534992	39546889	11897	0.0418732	0.0826068	0.506898	0.612226	0.844098	-0.00977559	0.0831242	-0.117602	0.906383	0.994941	1098.25	1056.81	1064.63	1092.78	994.028	960.866	1179.57	1041.22	1116.01	1031.17	1204.61	984.555	1078.05	1087.54	1108.37
ENSMUSG00000003153.10	Slc2a3	chr6	122727809	122801640	73831	-0.0127609	0.0672895	-0.189641	0.84959	0.948945	-0.129206	0.0674597	-1.91531	0.0554534	0.48476	5581.4	5130.56	5633.2	5304.54	4566.95	5166.38	5484.35	5793.29	5514.41	5431.77	5586.13	5307.78	5740.71	5541.22	5943.08
ENSMUSG00000003154.15	Foxj2	chr6	122819914	122845366	25452	0.068034	0.0845848	0.804329	0.421207	0.729424	0.041912	0.0848123	0.494174	0.621184	0.965617	2205.16	2162.32	2095.88	2313.88	1968.75	2015.69	2350.94	2163.56	2049.27	2215.63	2392.16	1862.8	2252.94	2075.34	2192.44
ENSMUSG00000003161.15	Sri	chr5	8046078	8069379	23301	0.0732117	0.0879086	0.832816	0.404948	0.717277	0.0390576	0.0885268	0.441195	0.659072	0.971647	778.021	759.34	736.894	697.475	715.228	846.865	777.789	790.835	809.951	725.599	785.698	818.866	756.205	725.658	646.847
ENSMUSG00000003166.19	Dgcr2	chr16	17839482	17894145	54663	0.00228311	0.054665	0.0417655	0.966686	0.988778	-0.0253979	0.0548696	-0.462877	0.643453	0.971017	4556.3	4467.52	4549.77	4505.65	4494.04	4339.56	4530.86	4743.25	4644.14	4332.13	4505.68	4827.96	4356.48	4601.85	4412.78
ENSMUSG00000003184.15	Irf3	chr7	44997648	45002848	5200	-0.138656	0.115836	-1.197	0.231305	0.565216	-0.0166761	0.116	-0.143759	0.88569	0.993206	759.65	837.935	849.477	990.332	734.53	682.753	944.124	750.279	775.353	722.533	790.436	689.571	961.856	822.539	923.939
ENSMUSG00000003190.12	Bcl2l12	chr7	44991222	44998712	7490	-0.306113	0.12212	-2.50666	0.0121878	0.11884	-0.0662338	0.122201	-0.542008	0.587813	0.959837	299.494	365.277	385.733	421.176	321.692	309.431	408.808	319.155	314.932	260.602	303.285	298.814	424.213	380.876	439.029
ENSMUSG00000003198.10	Zfp959	chr17	55892093	55898928	6835	0.162443	0.115977	1.40064	0.161321	0.478112	0.103154	0.117014	0.881553	0.378019	0.890543	279.411	266.805	245.328	272.16	228.401	248.046	318.613	325.327	267.914	225.855	298.546	240.392	241.617	238.403	260.898
ENSMUSG00000003199.16	Mpnd	chr17	56005711	56016790	11079	0.21474	0.11339	1.89381	0.0582496	0.287945	0.099595	0.113761	0.875479	0.381313	0.892579	1003.28	914.979	844.984	1047.25	770.988	761.677	1080	1069.43	965.2	894.224	1084.24	730.754	889.003	860.532	899.649
ENSMUSG00000003200.9	Sh3gl1	chr17	56016753	56036637	19884	0.0387618	0.0644585	0.601345	0.547611	0.810409	0.051823	0.0647414	0.800462	0.423443	0.912534	2273.65	2294.99	2211.08	2395.63	2326.9	2331.38	2126.04	2324.01	2176.13	2162.49	2431.97	2110.85	2211.44	2307.1	2214.94
ENSMUSG00000003206.6	Ebi3	chr17	55952623	55957021	4398	-0.0083441	0.160002	-0.05215	0.958409	NA	0.172309	0.159629	1.07943	0.280395	NA	9.3945	13.2228	9.48698	16.5573	8.57845	12.5276	15.2278	7.05316	7.98419	10.2197	12.321	9.57738	7.37761	5.69889	15.294
ENSMUSG00000003208.8	Ccdc94	chr17	55959187	55967949	8762	0.108321	0.135857	0.797316	0.425267	0.731952	0.114301	0.136701	0.836137	0.403078	0.903872	156.624	157.402	142.428	198.687	121.171	134.045	175.705	148.116	175.652	135.922	166.807	118.76	141.097	143.422	166.435
ENSMUSG00000003226.7	Ranbp2	chr10	58446920	58494356	47436	-0.314703	0.0973007	-3.23433	0.00121927	0.0269948	-0.0863174	0.0973064	-0.887068	0.375042	0.890466	10016	11930.2	12743	10832.6	10403.5	13200.3	13284.5	10470.4	10069.8	10009.2	9514.62	11038.9	13397.7	11993.3	14541.9
ENSMUSG00000003227.4	Edar	chr10	58600789	58675654	74865	0.322398	0.153137	2.10528	0.0352666	0.218997	-0.084376	0.155377	-0.54304	0.587102	0.95958	81.4892	54.3725	59.4652	56.9156	50.3984	55.1214	55.0544	104.916	68.3092	54.1644	98.5676	53.6333	60.8653	53.1896	70.1726
ENSMUSG00000003228.8	Grk5	chr19	60889749	61092553	202804	-0.304108	0.0971728	-3.12957	0.00175065	0.0348144	-0.240192	0.0972372	-2.47016	0.0135052	0.248565	4091.09	4295.63	5161.66	4049.29	4825.38	4280.68	4027.17	4120.81	3585.79	4698	3959.76	5303.95	4355.56	5632.4	5354.71
ENSMUSG00000003233.11	Dvl3	chr16	20516982	20532520	15538	0.0129406	0.080497	0.160759	0.872283	0.959183	-0.00627817	0.0808421	-0.0776597	0.938099	0.996145	1531.58	1509.18	1517.17	1543.97	1746.79	1356.74	1389.24	1559.63	1597.72	1521.71	1447.24	1572.61	1487.51	1484.56	1524
ENSMUSG00000003234.15	Abcf3	chr16	20548577	20561379	12802	0.00993754	0.0681408	0.145838	0.884049	0.963334	0.0924527	0.0683192	1.35325	0.175977	0.751229	2404.05	2552.78	2387.25	2684.35	2351.57	2525.56	2649.64	2541.78	2395.26	2206.43	2472.72	2287.08	2322.1	2500.86	2438.95
ENSMUSG00000003235.12	Eif2b5	chr16	20498817	20509955	11138	0.0120123	0.075793	0.158488	0.874073	0.959183	0.0258557	0.0764693	0.338119	0.735273	0.983885	747.887	755.659	741.522	773.018	763.482	734.117	752.019	759.977	795.757	704.137	731.675	656.051	751.594	771.249	787.193
ENSMUSG00000003269.17	Cyth2	chr7	45806637	45814581	7944	0.190162	0.0907794	2.09477	0.0361913	0.222276	0.116521	0.0914276	1.27447	0.202498	0.774057	804.563	760.985	696.964	804.063	723.807	744.139	771.933	831.391	715.028	782.829	889.004	601.459	764.505	740.855	681.034
ENSMUSG00000007080.14	Pole	chr5	110286306	110337474	51168	0.598288	0.147649	4.0521	5.07597e-05	0.00254718	0.288165	0.150205	1.91847	0.0550515	0.483777	82.021	61.8566	46.5767	65.1943	60.0492	77.671	44.512	75.8214	94.9231	65.4061	91.9333	46.9292	47.9545	44.6413	46.7817
ENSMUSG00000003273.14	Car11	chr7	45699843	45704682	4839	-0.0180667	0.12067	-0.14972	0.880986	0.961767	0.0174625	0.12069	0.144688	0.884957	0.993123	8903.91	9166.61	9036.59	11127.5	8301.8	7182.07	10055	8282.17	8017.9	9020.93	10294.6	7391.82	9673.9	8857.02	10223.6
ENSMUSG00000003279.16	Dlgap1	chr17	69969073	70821413	852340	-0.139945	0.127755	-1.09542	0.273334	0.6051	0.107086	0.127756	0.838207	0.401914	0.90306	112810	138966	126977	136161	174482	142455	102767	112008	123605	128436	87190.6	147628	120143	125367	114772
ENSMUSG00000003282.9	Plag1	chr4	3900996	3938423	37427	0.214436	0.0905776	2.36743	0.0179122	0.150129	0.233337	0.0907294	2.57179	0.0101175	0.213885	2470.49	2506.28	2102.14	2732.99	2285.09	2642.07	2365	2536.49	2438.73	2195.19	2711.56	2253.56	1920.02	2306.15	1928.85
ENSMUSG00000003283.14	Hck	chr2	153108468	153151441	42973	-0.0399458	0.103114	-0.387396	0.698463	0.885239	0.0017794	0.103573	0.0171802	0.986293	0.998383	564.669	583.709	582.504	522.589	575.829	622.621	613.798	602.163	506.552	539.6	610.361	589.009	468.479	638.275	634.252
ENSMUSG00000003299.10	Mrpl4	chr9	21002738	21008839	6101	0.0386223	0.089911	0.429561	0.667515	0.872734	0.0523531	0.0902104	0.580344	0.561682	0.953707	1288.28	1301.22	1251.29	1504.64	1191.33	1187.62	1321.3	1215.79	1374.17	1245.78	1317.39	1117.68	1351.03	1215.76	1320.68
ENSMUSG00000003308.15	Keap1	chr9	21229730	21239361	9631	0.103655	0.0894034	1.15941	0.246289	0.580053	0.0595831	0.0899637	0.662301	0.507778	0.941931	864.921	836.074	800.066	964.461	775.278	717.831	886.727	821.693	930.601	880.938	826.452	792.049	831.826	787.396	788.992
ENSMUSG00000009075.2	Cabp7	chr11	4736892	4746778	9886	0.463886	0.11961	3.87833	0.000105176	0.00448426	0.239869	0.122777	1.95369	0.0507382	0.467816	132.004	110.154	90.4241	119.005	109.375	111.496	100.738	142.826	137.505	134.9	112.784	97.6893	87.6092	86.4331	89.9649
ENSMUSG00000003316.14	Glg1	chr8	111154421	111259216	104795	-0.167375	0.0662335	-2.52704	0.0115028	0.11515	-0.134473	0.0662884	-2.0286	0.042499	0.430778	10390.3	10640.4	11726.2	10034.7	11035.1	11113.2	10378.3	10502.1	9919.02	11280.5	9859.61	12326.1	10917	11686.5	11975.2
ENSMUSG00000003341.9	Atp8b3	chr10	80519584	80539124	19540	0.0360755	0.160422	0.22488	0.822073	NA	0.0732419	0.159654	0.458752	0.646412	NA	12.8682	13.9988	12.0289	14.4876	8.57845	20.0441	12.8851	19.3962	9.75845	7.15379	15.1642	5.74643	15.6774	11.3978	15.294
ENSMUSG00000003344.14	Btbd2	chr10	80642617	80657071	14454	0.0960009	0.0866325	1.10814	0.267802	0.600478	0.0727664	0.0871809	0.834659	0.40391	0.904551	865.443	850.494	805.782	884.78	844.977	731.611	940.61	908.094	915.52	788.961	849.198	776.726	866.87	761.751	817.781
ENSMUSG00000003345.16	Csnk1g2	chr10	80622838	80640749	17911	-0.122537	0.0761264	-1.60966	0.107473	0.395063	0.0302743	0.0764028	0.396246	0.691924	0.977018	817.197	913.605	893.992	982.054	888.942	820.557	962.866	834.036	815.274	831.884	787.593	831.317	964.623	895.675	884.355
ENSMUSG00000003346.14	Abhd17a	chr10	80583654	80590341	6687	-0.0998806	0.123317	-0.809953	0.417967	0.72628	0.0820814	0.123437	0.664965	0.506073	0.941246	516.974	601.282	561.64	637.455	535.081	563.741	668.852	536.921	503.004	464.996	562.973	416.616	727.617	549.943	552.384
ENSMUSG00000003348.10	Mob3a	chr10	80685253	80701977	16724	-0.102529	0.14563	-0.704042	0.481407	0.769068	0.29288	0.145449	2.01363	0.0440489	0.438248	188.621	272.651	207.779	285.613	285.234	319.453	200.304	225.701	164.119	166.581	198.083	138.872	266.516	225.106	200.622
ENSMUSG00000011382.8	Dhdh	chr7	45470987	45488805	17818	0.674604	0.118128	5.71081	1.12438e-08	1.9748e-06	0.464637	0.118703	3.91427	9.06775e-05	0.00947406	759.028	640.622	438.488	678.848	668.047	572.511	643.082	724.712	774.466	647.929	889.004	495.151	320.926	468.259	469.617
ENSMUSG00000003354.5	Ccdc65	chr15	98708207	98723326	15119	0.00590181	0.124422	0.0474339	0.962167	0.987469	-0.0595576	0.125542	-0.474405	0.635211	0.96973	212.017	201.12	211.22	191.444	196.232	249.299	167.506	221.293	234.203	211.548	181.023	230.815	196.429	242.203	175.432
ENSMUSG00000003355.6	Fkbp11	chr15	98724373	98728198	3825	0.155818	0.166266	0.93716	0.348676	0.671036	0.217253	0.166113	1.30786	0.190921	NA	26.4431	29.1844	20.872	24.8359	26.8077	46.3521	18.7419	34.3841	24.8397	27.5932	18.9553	32.5631	22.1328	17.0967	11.6954
ENSMUSG00000003360.14	Ddx23	chr15	98645134	98662889	17755	0.0958829	0.0895461	1.07077	0.284275	0.616981	-0.0104876	0.0900557	-0.116457	0.90729	0.994941	1160.11	1070.31	1079.59	1217.99	1009.04	895.722	1158.48	1123.21	1206.5	1084.31	1226.41	1113.85	1090.96	1060.94	1052.59
ENSMUSG00000003363.15	Pld3	chr7	27532000	27553218	21218	-0.165495	0.0637633	-2.59546	0.00944645	0.101782	0.0223695	0.0637942	0.350651	0.725851	0.981966	6724.97	7699.64	7576.43	8149.29	7284.18	7684.42	7680.67	6571.78	6557.68	6583.53	7186.91	7078.64	8156.87	7396.21	7674
ENSMUSG00000003378.9	Grik5	chr7	25009849	25072346	62497	-0.011734	0.0842755	-0.139234	0.889265	0.964871	-0.0561232	0.0842926	-0.665814	0.50553	0.941246	31535.7	30510.9	31811.8	29736.9	28465.4	29920.9	33920.5	32202.9	27586.3	32380.1	33973.6	29856.5	31071.7	30603	35716.1
ENSMUSG00000003379.7	Cd79a	chr7	24897381	24902197	4816	0.0806575	0.133743	0.603076	0.546458	NA	-0.0205115	0.131616	-0.155844	0.876156	NA	7.01758	5.02491	5.37736	4.13932	0	11.2748	4.68548	9.69809	4.43566	9.19773	4.73883	5.74643	2.76661	7.59852	5.39789
ENSMUSG00000003380.11	Rabac1	chr7	24969752	24972754	3002	0.11378	0.119432	0.952676	0.340754	0.663988	0.0495199	0.120602	0.410604	0.681363	0.975667	230.573	218.788	210.263	231.802	214.461	182.903	245.988	230.991	267.027	204.394	219.882	191.548	256.372	187.113	206.02
ENSMUSG00000003382.18	Etv3	chr3	87525407	87540156	14749	0.0692098	0.0941043	0.735459	0.46206	0.756	0.083588	0.0944655	0.884853	0.376236	0.890523	979.182	990.986	929.359	983.088	839.616	1117.46	1023.78	1035.93	1004.23	848.235	1028.33	849.514	954.479	985.907	927.538
ENSMUSG00000003402.14	Prkcsh	chr9	22002806	22014222	11416	0.0134003	0.0819452	0.163527	0.870103	0.958489	0.0331636	0.0823123	0.4029	0.687022	0.977012	1197.05	1214.53	1184.79	1217.99	1200.98	1177.59	1261.57	1185.81	1179	1239.65	1183.76	1014.24	1308.6	1121.73	1294.59
ENSMUSG00000003410.8	Elavl3	chr9	22015005	22052023	37018	-0.056874	0.081154	-0.700816	0.483418	0.771286	-0.00570397	0.0811901	-0.0702545	0.943991	0.997185	10791.5	11208.2	11255.6	10738.4	12229.7	12185.6	9679.03	11365.3	10330.7	10788.9	10681.3	12152.7	10575.8	11471.9	10821.9
ENSMUSG00000003411.10	Rab3b	chr4	108879063	108943324	64261	-0.176377	0.0940352	-1.87565	0.0607037	0.294272	-0.128206	0.094213	-1.36081	0.173573	0.748725	1708.67	1772.06	1953.39	1566.73	2155.34	1653.64	1712.54	1665.43	1784.91	1734.28	1650.06	1961.45	2052.82	1739.11	2060.2
ENSMUSG00000003418.11	St8sia6	chr2	13651021	13794064	143043	0.134042	0.141005	0.95062	0.341797	0.664878	0.209009	0.141263	1.47957	0.138989	0.691183	314.454	336.429	278.432	239.046	475.032	310.684	320.955	294.469	361.95	346.448	254.949	266.251	245.306	295.392	306.78
ENSMUSG00000003420.8	Fcgrt	chr7	45092990	45103851	10861	0.0237574	0.152198	0.156095	0.875958	NA	-0.0698645	0.151286	-0.461806	0.644221	NA	19.377	15.506	18.3429	13.4528	6.43384	17.5386	24.5988	14.988	12.4198	11.2417	38.8584	16.2815	6.45541	21.8457	28.7888
ENSMUSG00000003421.13	Nosip	chr7	45062429	45078210	15781	0.159077	0.0804113	1.97829	0.047896	0.259635	-0.070692	0.0818232	-0.86396	0.38761	0.896095	687.143	579.013	611.02	603.306	609.07	508.62	595.056	629.494	730.11	672.456	716.511	611.995	585.598	639.225	607.263
ENSMUSG00000003423.15	Pih1d1	chr7	45154303	45160065	5762	-0.00419013	0.117309	-0.0357189	0.971507	0.990275	-0.0284833	0.118111	-0.241158	0.809433	0.988506	308.026	301.669	309.164	355.981	304.535	293.146	253.016	300.641	307.835	287.174	336.457	282.533	367.036	333.385	253.701
ENSMUSG00000003429.11	Rps11	chr7	45122379	45124439	2060	0.0744122	0.143688	0.517875	0.604546	0.840301	-0.0273837	0.144863	-0.189032	0.850068	0.991262	122.618	111.264	114.13	126.249	100.797	110.243	107.766	100.507	106.456	158.405	125.105	85.2387	139.252	100.68	131.349
ENSMUSG00000003435.9	Supt5	chr7	28314891	28338746	23855	-0.0685806	0.0600923	-1.14125	0.253764	0.587077	-0.011483	0.0602446	-0.190606	0.848834	0.991148	3802.27	3960.63	3993.86	4198.3	3795.96	3679.35	4168.9	3791.95	3750.79	3717.93	3948.39	3895.12	4013.42	3913.24	4153.68
ENSMUSG00000003436.11	Dll3	chr7	28293553	28302238	8685	0.0245251	0.153169	0.160118	0.872788	NA	-0.0678224	0.151575	-0.44745	0.65455	NA	11.0804	8.89083	10.4248	3.10449	10.7231	10.0221	11.7137	7.9348	9.75845	14.3076	12.321	8.61964	3.68881	11.3978	17.993
ENSMUSG00000003437.14	Paf1	chr7	28392951	28399388	6437	0.0492306	0.0879998	0.55944	0.575862	0.825791	0.0334415	0.0883939	0.378324	0.70519	0.977811	1141.83	1128.77	1100.32	1151.77	974.727	1192.63	1195.97	1087.95	1154.16	1140.52	1184.71	943.372	1169.35	1189.17	1099.37
ENSMUSG00000003438.17	Timm50	chr7	28305516	28312072	6556	-0.0160686	0.106303	-0.151159	0.87985	0.961251	0.044691	0.106968	0.417797	0.676096	0.975212	330.863	346.353	334.958	411.862	360.295	298.157	315.098	346.486	315.819	320.899	340.248	290.195	346.748	328.636	374.254
ENSMUSG00000003444.8	Med29	chr7	28386146	28392708	6562	-0.0422141	0.116747	-0.361587	0.71766	0.893907	-0.0705872	0.11869	-0.594718	0.552032	0.952174	127.763	124.65	132.156	135.563	114.737	107.737	140.564	122.549	140.167	130.812	117.523	126.421	128.186	129.175	144.843
ENSMUSG00000003452.15	Bicd1	chr6	149408886	149563329	154443	-0.240437	0.0898654	-2.67552	0.00746133	0.088274	-0.128712	0.0898823	-1.43201	0.152142	0.716281	13882.1	15099.8	16634.8	13879.1	16698	16485.1	13337.2	13477.7	13600.6	15713.8	12736.1	18069.6	15744.8	16577.1	16147.8
ENSMUSG00000003458.12	Ncstn	chr1	172066013	172082795	16782	-0.00119293	0.083634	-0.0142637	0.98862	0.996111	0.046299	0.0838026	0.552477	0.580621	0.958546	2232.64	2312.52	2234.73	2532.23	2127.46	2034.48	2555.93	2109.78	2399.69	2163.51	2257.58	2247.81	2370.06	2163.68	2157.36
ENSMUSG00000003464.13	Pex19	chr1	172126755	172136493	9738	0.00951808	0.0848947	0.112116	0.910731	0.970543	-0.0019663	0.0853454	-0.0230393	0.981619	0.998383	1042.15	1033.23	1035.06	1062.77	991.883	905.745	1172.54	1000.67	1128.43	951.454	1088.03	1008.5	1049.47	1065.69	1016.6
ENSMUSG00000003469.9	Phyhip	chr14	70457476	70468832	11356	0.183438	0.110338	1.66252	0.0964096	0.374422	0.0979766	0.110411	0.887379	0.374875	0.890466	4961.03	4636.34	4289.82	4909.23	4159.48	4169.18	5307.48	4711.51	4958.18	4766.47	5407.95	3696.87	5458.51	3946.48	4057.42
ENSMUSG00000003476.16	Crhr2	chr6	55090049	55133016	42967	0.0635126	0.15719	0.40405	0.686176	0.879676	0.0299554	0.157492	0.190202	0.84915	0.991148	181.069	174.647	169.614	157.294	285.234	119.012	137.05	209.831	212.912	171.691	129.844	160.9	162.308	185.214	170.034
ENSMUSG00000003484.4	Cyp4f18	chr8	71988482	72009626	21144	-0.043572	0.158436	-0.275013	0.783306	0.924672	0.404564	0.158389	2.55424	0.010642	0.220469	464.973	744.445	487.571	702.65	884.653	794.249	596.227	330.617	817.048	358.711	353.517	559.319	486.923	492.004	412.039
ENSMUSG00000003500.13	Impdh1	chr6	29200434	29216364	15930	0.184642	0.0972134	1.89935	0.0575184	0.286025	-0.0334211	0.0982862	-0.340039	0.733828	0.983875	634.712	537.015	551.043	582.609	497.55	534.928	532.973	556.318	703.496	620.336	658.697	507.601	639.086	501.502	555.983
ENSMUSG00000003518.13	Dusp3	chr11	101971143	101987013	15870	-0.131829	0.113198	-1.16458	0.244187	0.577931	0.183773	0.113183	1.62368	0.104443	0.626459	1994.08	2566.53	2215.9	2538.44	2311.89	2496.75	2919.05	2201.47	1901.12	2013.28	1860.46	1662.63	2647.64	2150.38	2402.96
ENSMUSG00000003526.11	Prodh	chr16	18060357	18090203	29846	-0.0148723	0.111542	-0.133333	0.89393	0.966051	-0.0886681	0.112278	-0.789722	0.42969	0.914049	456.43	429.894	462.065	484.3	491.116	365.806	378.352	476.088	451.55	373.019	525.062	449.179	449.112	458.76	491.208
ENSMUSG00000003527.8	Dgcr14	chr16	17900711	17911348	10637	0.0350303	0.0910499	0.384737	0.700432	0.885991	-0.00960766	0.0917511	-0.104714	0.916603	0.994941	667.372	645.958	650.201	622.968	577.973	641.412	741.477	726.475	677.769	613.182	652.063	601.459	717.473	627.827	654.045
ENSMUSG00000003528.14	Slc25a1	chr16	17925211	17928219	3008	0.126014	0.115486	1.09117	0.2752	0.607301	0.275149	0.11582	2.37566	0.0175176	0.280747	309.924	348.678	279.882	437.733	340.993	268.09	347.897	306.812	302.512	314.767	315.606	268.167	250.839	298.242	302.282
ENSMUSG00000003531.14	Dgcr6	chr16	18052860	18071632	18772	-0.103334	0.143797	-0.718615	0.472378	0.762616	-0.14952	0.144119	-1.03748	0.299514	0.851562	372.431	356.61	409.746	422.211	412.838	358.289	233.103	387.924	424.936	354.624	322.24	478.869	405.769	468.259	286.088
ENSMUSG00000003534.17	Ddr1	chr17	35681567	35704621	23054	-0.0262835	0.111886	-0.234913	0.814276	0.935921	-0.352147	0.112622	-3.12679	0.00176727	0.0734205	860.46	663.06	878.601	760.6	565.105	621.368	705.165	889.579	825.92	763.412	962.93	840.894	786.638	806.393	1080.48
ENSMUSG00000003541.6	Ier3	chr17	35821684	35822923	1239	-0.0775417	0.162761	-0.476416	0.633778	NA	-0.360639	0.160784	-2.243	0.0248966	NA	13.5338	7.53385	15.3128	6.20898	4.28923	13.7803	5.85685	8.81644	17.7426	14.3076	13.2687	14.3661	18.444	10.448	17.993
ENSMUSG00000003545.3	Fosb	chr7	19302696	19310051	7355	0.304913	0.161164	1.89194	0.0584988	0.28857	0.0951282	0.161051	0.59067	0.554741	0.952313	228.617	157.479	130.039	95.2044	128.677	281.871	124.165	131.365	338.884	178.845	265.374	67.9994	147.552	129.175	175.432
ENSMUSG00000003546.9	Klc4	chr17	46630631	46645144	14513	-0.00707188	0.101414	-0.069733	0.944406	0.982199	0.068252	0.101917	0.669684	0.503059	0.941103	451.917	478.444	454.478	498.788	560.816	418.421	435.749	412.61	488.81	433.315	472.935	453.01	502.6	451.162	411.139
ENSMUSG00000003549.9	Ercc1	chr7	19344778	19356524	11746	0.031564	0.0829007	0.380744	0.703393	0.887666	-0.020613	0.0837371	-0.246163	0.805556	0.988088	673.358	647.579	657.689	663.326	625.155	583.786	718.05	717.659	643.171	666.324	666.279	618.699	636.319	650.623	725.117
ENSMUSG00000003555.7	Cyp17a1	chr19	46667165	46672974	5809	-0.0627875	0.152794	-0.41093	0.681124	NA	0.0671725	0.15219	0.441373	0.658943	NA	8.97118	12.3376	10.4988	10.3483	8.57845	17.5386	12.8851	4.40822	14.1941	3.06591	14.2165	15.3238	7.37761	7.59852	11.6954
ENSMUSG00000003559.7	As3mt	chr19	46707443	46741095	33652	0.289926	0.127853	2.26765	0.0233508	0.174077	0.156372	0.129549	1.20704	0.227416	0.799449	158.892	141.917	124.419	135.563	172.641	135.298	124.165	128.72	182.749	143.076	181.023	126.421	113.431	129.175	128.65
ENSMUSG00000003573.15	Homer3	chr8	70282827	70294361	11534	-0.166823	0.123574	-1.34999	0.17702	0.49907	-0.048557	0.124505	-0.390002	0.696535	0.977018	110.506	122.035	126.997	143.841	100.797	124.023	119.48	113.732	117.101	102.197	108.993	116.844	115.275	130.125	145.743
ENSMUSG00000003575.13	Crtc1	chr8	70382355	70439579	57224	-0.0120794	0.0620291	-0.194738	0.845598	0.946737	-0.0628715	0.0621079	-1.0123	0.311397	0.855426	10964.2	10571	11059.6	10481.8	10427.1	10493.1	10882	11396.1	10126.6	10952.5	11381.7	10911.5	10351.7	10983.7	11991.4
ENSMUSG00000003581.14	Rnf215	chr11	4135202	4141172	5970	0.0280351	0.085855	0.326541	0.744015	0.907147	-0.0288202	0.0867911	-0.332064	0.739841	0.984095	575.927	551.899	563.804	551.564	536.153	523.653	596.227	592.465	539.376	567.193	604.674	500.897	633.553	541.394	579.374
ENSMUSG00000003585.13	Sec14l2	chr11	4097039	4123415	26376	-0.100779	0.096771	-1.04142	0.297682	0.627773	-0.0617431	0.0972109	-0.635146	0.525333	0.947709	679.716	699.557	734.247	783.366	781.711	626.379	606.769	742.345	662.688	694.94	618.891	738.416	780.183	742.755	675.636
ENSMUSG00000003604.14	Aven	chr2	112492964	112634573	141609	-0.0365714	0.0729917	-0.501035	0.616347	0.845864	0.175137	0.0730128	2.39872	0.0164526	0.274391	5964.72	6961.41	6126.14	7475.61	6563.59	6483.03	7323.4	6301.11	5899.43	5806.83	5851.5	5904.45	5880.88	5893.6	6825.64
ENSMUSG00000003617.16	Cp	chr3	19957054	20009145	52091	-0.17245	0.0828953	-2.08033	0.037495	0.226976	-0.206052	0.0840849	-2.45053	0.0142647	0.253891	438.804	428.789	498.934	408.758	399.97	483.565	422.864	456.692	427.598	403.678	467.248	508.559	505.367	482.506	499.305
ENSMUSG00000003623.4	Crot	chr5	8966033	8997324	31291	0.0163533	0.0829373	0.197177	0.843689	0.945956	0.170858	0.08315	2.05481	0.0398972	0.42072	919.306	1031.29	908.117	913.755	1145.22	1116.21	949.981	850.787	941.247	927.949	957.243	927.09	924.046	903.274	878.057
ENSMUSG00000003644.17	Rps6ka1	chr4	133847290	133887797	40507	-0.029175	0.13437	-0.217124	0.828112	0.940437	0.0979329	0.134681	0.727146	0.467136	0.930831	234.939	262.489	241.181	254.568	312.041	281.871	201.476	216.885	251.058	206.438	265.374	277.744	181.674	283.995	221.314
ENSMUSG00000003657.9	Calb2	chr8	110137502	110168210	30708	-0.203574	0.160497	-1.2684	0.204656	NA	-0.0635019	0.160153	-0.396507	0.691731	NA	13.5306	18.0035	20.1968	15.5224	20.3738	15.0331	21.0847	15.8696	18.6298	9.19773	10.4254	26.8167	5.53321	31.3439	17.0933
ENSMUSG00000003660.10	Snrnp200	chr2	127208386	127240451	32065	0.0482677	0.0604523	0.798443	0.424614	0.731604	-0.0110743	0.0607396	-0.182324	0.855329	0.99169	3188.71	3056.16	3080.33	3082.76	2829.82	2967.79	3344.26	3234.75	3172.38	3113.94	3233.78	3016.87	3167.76	3120.14	3016.52
ENSMUSG00000003662.10	Ciao1	chr2	127240938	127247816	6878	0.207323	0.0905511	2.28956	0.0220466	0.168591	0.0628724	0.091275	0.688823	0.490935	0.93678	892.687	801.507	763.849	738.869	735.602	815.546	916.011	916.029	1005.12	842.103	807.496	736.501	737.761	775.049	806.085
ENSMUSG00000003665.6	Has1	chr17	17843328	17855188	11860	0.15312	0.0627376	2.44063	0.0146616	0.132511	0.0129208	0.0630711	0.204861	0.837681	0.991148	3347.59	3025.07	2997.62	3154.16	3063.58	2901.39	2981.14	3174.8	3175.05	3557.48	3483.04	2963.24	2867.13	2985.27	3174.86
ENSMUSG00000003680.15	Taf6l	chr19	8772522	8786417	13895	0.0783788	0.107156	0.731443	0.464508	0.757708	-0.0389227	0.108011	-0.360358	0.718579	0.980561	495.658	452.044	466.092	523.624	348.5	434.707	501.346	491.076	519.859	473.172	498.525	439.602	496.145	429.316	499.305
ENSMUSG00000003721.14	Insig2	chr1	121304353	121332589	28236	0.0352455	0.0592436	0.594924	0.551894	0.812598	0.0376324	0.0595319	0.632138	0.527296	0.947709	2602.08	2607.69	2537.66	2432.89	2593.91	2693.43	2710.55	2634.35	2595.75	2475.21	2703.03	2605.05	2560.95	2583.5	2401.16
ENSMUSG00000003731.13	Kpna6	chr4	129643980	129672767	28787	-0.0438459	0.069381	-0.631958	0.527414	0.797063	-0.0491172	0.0696821	-0.704876	0.480888	0.935156	2076.06	2068.07	2143.06	2037.58	2045.96	1964.33	2224.43	2078.92	2122.02	2107.3	1995.99	1960.49	2361.76	2113.34	2136.67
ENSMUSG00000003746.16	Man1a	chr10	53904785	54076609	171824	-0.109384	0.092397	-1.18385	0.236474	0.570754	-0.219837	0.0924282	-2.37846	0.017385	0.279975	18164.1	16706.7	19730.3	16255.1	17896.8	15153.4	17521.3	17982.9	15848.6	20267.7	18557.2	20729.3	16761.9	21436.4	19993.8
ENSMUSG00000003752.9	Itpkc	chr7	27207172	27228661	21489	-0.143894	0.0696394	-2.06627	0.0388031	0.230964	-0.0661854	0.0701519	-0.943458	0.345447	0.876787	825.229	873.127	916.034	879.605	878.219	845.612	889.07	845.497	825.033	812.466	817.922	842.809	989.523	870.98	960.825
ENSMUSG00000003762.13	Coq8b	chr7	27233023	27257950	24927	-0.0448999	0.0685637	-0.654863	0.512556	0.787579	-0.19445	0.0692905	-2.8063	0.00501135	0.145389	1385.72	1243.26	1431.96	1295.61	1169.89	1202.65	1304.91	1453.83	1388.36	1312.21	1388.48	1412.66	1322.44	1508.31	1484.42
ENSMUSG00000003778.14	Brd8	chr18	34598615	34624601	25986	-0.0164398	0.0693018	-0.237221	0.812485	0.934916	-0.076963	0.0694848	-1.10762	0.268025	0.825939	4185.92	4006.33	4236.44	4061.71	3637.26	3898.58	4427.78	4247.76	4105.65	3950.94	4439.33	4429.54	4125.93	4176.33	4213.95
ENSMUSG00000003779.15	Kif20a	chr18	34624624	34633265	8641	0.12884	0.0825653	1.56046	0.11865	0.413877	0.0205106	0.0833026	0.246218	0.805514	0.988088	922.769	851.803	838.949	907.546	758.121	843.107	898.44	956.584	911.972	834.949	987.572	792.049	888.08	878.578	797.089
ENSMUSG00000003808.18	Farsa	chr8	84856989	84869257	12268	-0.185874	0.0832329	-2.23317	0.0255375	0.183743	-0.115418	0.0835638	-1.3812	0.167219	0.736421	1016.02	1071.1	1166.28	1021.38	985.45	1052.32	1225.25	1066.79	983.829	1010.73	1002.74	1101.4	1157.36	1103.68	1302.69
ENSMUSG00000003809.14	Gcdh	chr8	84886393	84893921	7528	0.00609888	0.0921174	0.0662077	0.947212	0.982891	0.0861718	0.0924664	0.931925	0.351375	0.879429	769.929	817.909	766.462	832.003	769.916	729.106	940.61	704.434	814.387	742.972	817.922	773.852	835.515	765.551	690.93
ENSMUSG00000003810.12	Mast2	chr4	116306762	116464183	157421	-0.219602	0.102439	-2.14373	0.0320549	0.209546	-0.0785672	0.102453	-0.766863	0.443163	0.918358	10970.3	12237.7	13005.6	11980.2	14080.5	12894.6	9995.3	10634.4	11882.2	12103.2	9261.57	14026.1	13090.7	12703.8	12201.9
ENSMUSG00000003812.13	Dnase2a	chr8	84908560	84922915	14355	-0.15434	0.147514	-1.04627	0.295436	0.626685	0.0719971	0.14753	0.488018	0.625537	0.966859	942.151	1167.01	1090.72	1209.72	1489.43	1061.09	907.811	873.71	1099.16	1157.89	637.846	1010.41	1399.9	1130.28	822.279
ENSMUSG00000003813.15	Rad23a	chr8	84834019	84840665	6646	0.240673	0.0898124	2.67973	0.00736814	0.0879357	0.122665	0.090489	1.35558	0.175233	0.750604	900.721	823.871	751.587	927.208	757.048	730.358	880.87	840.207	1009.56	897.29	855.832	734.585	793.094	742.755	735.913
ENSMUSG00000003814.8	Calr	chr8	84841850	84846934	5084	-0.0496195	0.152041	-0.326355	0.744156	0.907147	-0.183794	0.152106	-1.20833	0.226922	0.798748	1667.31	1460.25	1749.93	1502.57	1153.8	1148.78	2035.84	1330.4	1573.77	2161.47	1603.62	1291.99	2382.97	1424.72	1900.06
ENSMUSG00000003824.12	Syce2	chr8	84872111	84888221	16110	-0.0189116	0.089917	-0.210323	0.833416	0.943348	0.0023649	0.0909761	0.0259948	0.979262	0.998383	347.756	353.563	352.61	342.529	344.21	362.047	365.467	323.563	367.273	349.514	350.673	305.518	348.592	386.575	369.756
ENSMUSG00000003847.16	Nfat5	chr8	107293470	107379517	86047	-0.11022	0.0592232	-1.8611	0.0627302	0.298857	-0.0139453	0.0592577	-0.235333	0.81395	0.988604	13882.2	14873.9	15022.8	14073.7	15573.1	15738.4	14110.3	14101.9	13109.1	14246.3	14071.5	15488.5	14497.9	15362.3	14742.5
ENSMUSG00000003848.14	Nob1	chr8	107412486	107425051	12565	-0.0370426	0.0910352	-0.406904	0.684079	0.878745	0.0518706	0.0913979	0.567525	0.570357	0.95611	719.801	769.714	740.068	858.909	651.962	767.941	800.045	689.446	704.383	694.94	790.436	667.543	746.983	769.35	776.397
ENSMUSG00000003849.8	Nqo1	chr8	107388225	107403206	14981	0.0724815	0.147064	0.492856	0.622114	0.848288	-0.225465	0.149834	-1.50477	0.132383	0.680887	70.2604	52.5543	65.8178	69.3336	41.82	46.3521	52.7116	81.1113	64.7606	60.2962	74.8735	66.0839	57.1765	78.8346	61.1761
ENSMUSG00000003863.18	Ppfia3	chr7	45339122	45367019	27897	-0.0140464	0.0741361	-0.189468	0.849726	0.948945	0.027097	0.074274	0.364824	0.715242	0.97971	3393.26	3496.39	3428.53	3649.85	3865.66	3452.6	3017.45	3566.25	3366.67	3316.29	3323.81	3397.1	3469.32	3518.11	3329.6
ENSMUSG00000003865.16	Gys1	chr7	45434844	45456619	21775	0.186369	0.0911031	2.04569	0.0407864	0.236825	0.145241	0.0915402	1.58664	0.112594	0.645363	1065.23	1032.25	925.399	1074.15	1108.76	1052.32	893.755	953.058	1091.17	1107.82	1108.89	925.175	1006.12	966.911	803.386
ENSMUSG00000003868.14	Ruvbl2	chr7	45421760	45438096	16336	0.0830057	0.108649	0.763982	0.444878	0.747245	0.038496	0.109103	0.352841	0.724208	0.981672	720.592	695.428	674.579	733.694	639.095	681.501	727.421	678.866	659.139	815.532	728.832	518.136	734.995	773.149	672.038
ENSMUSG00000003872.9	Lin7b	chr7	45367891	45370583	2692	0.0256907	0.0998739	0.257232	0.797	0.928932	0.16325	0.0999818	1.6328	0.102511	0.622029	1482.5	1648.18	1453.35	1828.54	1303.92	1604.78	1855.45	1494.39	1404.33	1453.24	1578.03	1363.82	1612.01	1381.03	1456.53
ENSMUSG00000003873.11	Bax	chr7	45461697	45466898	5201	0.175672	0.109806	1.59984	0.109635	0.398741	0.146926	0.110828	1.32571	0.184936	0.758767	293.527	286.772	255.281	302.17	258.426	246.793	339.697	275.955	306.061	309.657	282.434	214.533	273.894	274.496	258.199
ENSMUSG00000003882.4	Il7r	chr15	9506161	9529876	23715	0.104128	0.145576	0.715287	0.474432	NA	0.131683	0.144489	0.911372	0.362099	NA	9.68096	10.3749	7.13777	4.13932	19.3015	7.51655	10.5423	8.81644	5.32279	12.2636	12.321	5.74643	4.61101	3.79926	14.3944
ENSMUSG00000003923.14	Tfam	chr10	71225464	71238280	12816	0.157064	0.0899628	1.74587	0.0808333	0.340568	0.0152215	0.0906644	0.167888	0.866671	0.992237	924.458	831.735	821.679	764.739	739.891	878.184	944.124	888.698	1013.99	862.543	932.601	838.979	876.092	816.84	754.805
ENSMUSG00000003929.10	Zfp81	chr17	33329342	33358878	29536	-0.183867	0.0817211	-2.24994	0.0244528	0.178726	-0.122286	0.0818338	-1.49433	0.13509	0.685455	3232.61	3384.21	3704.39	3157.27	3287.69	3810.89	3281.01	3317.63	3135.12	3272.35	3205.34	4253.31	3409.38	3661.53	3493.34
ENSMUSG00000003934.5	Efnb3	chr11	69554092	69560205	6113	-0.368188	0.116882	-3.15008	0.00163223	0.0330793	-0.44344	0.117193	-3.78386	0.000154416	0.0142462	952.482	895.668	1282.1	885.814	883.58	829.326	983.95	932.78	851.647	902.399	1123.1	985.512	1331.66	1223.36	1587.88
ENSMUSG00000003948.17	Mmd	chr11	90249456	90278589	29133	-0.226006	0.0697478	-3.24033	0.00119391	0.0267454	-0.0564572	0.0697869	-0.808994	0.418519	0.911161	5690.62	6436.83	6705.66	6552.54	5886.96	6543.16	6764.66	5744.79	5286.42	5714.86	6016.42	6080.68	6986.6	6842.46	6912.9
ENSMUSG00000003949.16	Hlf	chr11	90336536	90390895	54359	0.155515	0.0861318	1.80555	0.0709889	0.317416	0.209298	0.0861591	2.4292	0.0151322	0.262347	12806.6	13331.8	11401.9	13433.1	11931.6	13895.6	14067	13680.5	11475.9	12199.3	13870.5	10294.7	12354.7	10797.5	12160.6
ENSMUSG00000003955.7	Fam162a	chr16	36043844	36071515	27671	0.0857448	0.0799746	1.07215	0.283653	0.616528	0.00292661	0.0803339	0.0364306	0.970939	0.998383	1851.4	1741.79	1737.65	1676.42	1650.28	1746.35	1894.1	1909.64	1635.87	1825.24	2034.85	1766.07	1611.09	1721.06	1852.38
ENSMUSG00000003970.8	Rpl8	chr15	76904071	76906318	2247	0.182892	0.109668	1.66769	0.0953777	0.372868	-0.015706	0.112235	-0.139939	0.888708	0.993536	191.089	163.065	165.237	163.503	157.629	156.595	174.534	162.223	193.395	199.284	209.456	152.28	177.063	180.465	151.141
ENSMUSG00000015112.15	Slc25a13	chr6	6041218	6217173	175955	0.72878	0.105653	6.89789	5.278e-12	2.07873e-09	0.559816	0.105777	5.2924	1.20724e-07	5.14428e-05	4170.83	3656.24	2358.38	3157.27	4252.77	3288.49	3926.43	4022.06	4061.29	4084.81	4515.16	2303.36	1939.39	2482.82	2707.94
ENSMUSG00000003992.14	Ssbp2	chr13	91460283	91703429	243146	-0.056078	0.0760952	-0.736945	0.461156	0.755482	-0.0320163	0.0761029	-0.420697	0.673977	0.97467	62639.6	63755.2	65269.7	60157.8	63549.2	66005.3	65308.5	62268.8	57793.1	65756.6	64740	65222	57840.5	64494.3	73522
ENSMUSG00000004018.9	Fancl	chr11	26386135	26471876	85741	-0.0721601	0.0854542	-0.84443	0.398429	0.712462	-0.154411	0.0857101	-1.80155	0.071617	0.540748	2326.9	2188.66	2455.69	2193.84	2084.56	2476.7	1999.53	2302.86	2294.12	2365.86	2344.77	2781.27	2228.96	2560.7	2251.82
ENSMUSG00000004031.13	Brinp2	chr1	158245269	158356326	111057	-0.0418847	0.0996471	-0.420331	0.674244	0.875301	0.0907667	0.0996556	0.910804	0.362399	0.88526	19567.8	21669.7	20208.7	22435.1	24292	20461.3	19490.4	20299	19834.5	22588.6	15549	19647	21527.9	20041.1	19618.6
ENSMUSG00000004032.10	Gstm5	chr3	107895821	107898686	2865	0.302094	0.142159	2.12505	0.0335825	0.214825	0.0835794	0.142842	0.585117	0.558469	0.952901	317.761	260.525	241.509	328.041	189.798	190.419	333.84	353.539	312.27	268.778	336.457	211.66	274.816	239.353	240.206
ENSMUSG00000016664.14	Pacsin2	chr15	83375607	83464606	88999	0.389377	0.0743862	5.23453	1.65405e-07	2.08172e-05	0.734651	0.0743625	9.87931	5.11846e-23	2.22469e-19	5109.43	6576.66	3842.3	6370.41	6515.33	6102.19	7318.72	5159.38	4950.2	4795.08	5533.06	3896.08	3591.98	3785.96	4095.2
ENSMUSG00000004038.9	Gstm3	chr3	107963696	107969283	5587	0.0119028	0.134471	0.0885159	0.929467	NA	0.0548005	0.132774	0.412734	0.679801	NA	4.31854	5.07625	4.1905	4.13932	4.28923	2.50552	9.37096	5.28987	7.09706	2.04394	2.8433	3.83095	5.53321	3.79926	3.59859
ENSMUSG00000004040.16	Stat3	chr11	100885098	100939540	54442	0.164586	0.0954506	1.72431	0.0846525	0.349663	0.348572	0.0954796	3.65074	0.000261481	0.0203674	3986.55	4586.04	3516.41	4758.15	4391.09	4412.22	4782.7	4457.59	3684.26	3843.63	3960.71	2960.37	3331.92	3584.6	4188.76
ENSMUSG00000004043.14	Stat5a	chr11	100859351	100885169	25818	0.0429118	0.1643	0.261179	0.793954	0.928487	0.13476	0.164619	0.818617	0.413005	NA	34.4254	38.6638	32.7616	36.219	26.8077	40.0883	51.5403	37.0291	39.0338	26.5712	35.0673	23.9435	23.9772	40.842	42.2835
ENSMUSG00000004044.9	Cavin1	chr11	100956733	100970887	14154	0.174664	0.158339	1.1031	0.269984	NA	-0.0425295	0.156567	-0.271637	0.785901	NA	15.3186	9.82152	10.9155	15.5224	4.28923	11.2748	8.19959	14.988	14.1941	11.2417	20.8508	3.83095	11.9886	16.1468	11.6954
ENSMUSG00000004054.8	Map3k11	chr19	5689131	5702862	13731	0.0214619	0.093908	0.228541	0.819225	0.93735	0.0783952	0.0942481	0.831796	0.405524	0.90518	860.105	898.041	846.086	932.382	869.641	851.876	938.267	868.42	810.839	799.18	961.982	721.177	974.767	813.041	875.358
ENSMUSG00000004056.15	Akt2	chr7	27591552	27640826	49274	0.076183	0.0786812	0.96825	0.33292	0.657294	-0.0639957	0.0788795	-0.811309	0.417188	0.910246	4083.74	3682.7	3861.19	4027.56	3531.11	3351.13	3821.01	4472.58	3941.53	3725.08	4195.76	3780.19	3625.18	3936.98	4102.4
ENSMUSG00000004069.16	Dnaja3	chr16	4639989	4707695	67706	-0.0349839	0.0693574	-0.504401	0.61398	0.84503	0.0730069	0.069398	1.052	0.292798	0.846493	8898.15	9623.54	9126.92	9399.36	10223.4	8826.94	10044.5	9519.11	8543.08	9013.77	8516.62	8725.95	9531.88	8628.12	9621.74
ENSMUSG00000004070.15	Hmox2	chr16	4726361	4766742	40381	0.00447852	0.0714117	0.0627142	0.949994	0.983533	0.0231674	0.0715532	0.323779	0.746105	0.984462	3858.41	3912.26	3845.98	3756.43	3836.71	4296.96	3758.93	4123.45	3639.9	3629.02	4041.27	3825.21	3697.11	3739.42	4122.19
ENSMUSG00000004071.12	Cdip1	chr16	4750348	4790292	39944	-0.0258651	0.0485465	-0.53279	0.594179	0.835165	0.00660731	0.0486559	0.135797	0.891982	0.993536	7735.85	7917.01	7878.96	7761.22	7647.69	8121.63	8137.5	7918.05	7552.15	7505.35	7967.87	7691.59	8045.29	7699.2	8079.75
ENSMUSG00000016239.11	Lonrf3	chrX	36328353	36362341	33988	0.699173	0.11787	5.93173	2.99752e-09	6.41334e-07	-0.0113786	0.119082	-0.0955528	0.923876	0.994941	896.272	503.543	509.008	541.216	534.009	407.147	531.802	919.555	914.633	696.983	1053.92	503.77	435.279	567.989	528.993
ENSMUSG00000004096.9	Cwc15	chr9	14500617	14510577	9960	-0.00414068	0.0973585	-0.0425302	0.966076	0.988565	-0.00684178	0.0977157	-0.0700172	0.94418	0.997185	992.32	990.574	995.685	1031.73	843.905	944.58	1142.09	960.111	1046.82	894.224	1068.13	1029.57	1099.26	931.768	922.14
ENSMUSG00000004098.7	Col5a3	chr9	20770050	20815067	45017	-0.142298	0.165328	-0.860698	0.389404	NA	-0.320259	0.164597	-1.94572	0.0516888	NA	20.4268	14.9807	25.3565	16.5573	6.43384	27.5607	9.37096	18.5145	28.3882	22.4833	12.321	21.0702	25.8217	27.5446	26.9895
ENSMUSG00000004099.16	Dnmt1	chr9	20907209	20959888	52679	-0.00687195	0.0554097	-0.124021	0.901299	0.967668	0.00218803	0.0557483	0.0392485	0.968692	0.998383	2342.99	2358.14	2355.07	2368.73	2381.59	2293.8	2388.42	2349.58	2380.17	2285.12	2357.09	2492.99	2355.3	2384.03	2187.95
ENSMUSG00000004100.12	Ppan	chr9	20888175	20892178	4003	0.0168129	0.111503	0.150785	0.880146	0.961331	-0.0189705	0.112504	-0.168621	0.866095	0.992237	293.648	285.581	289.896	278.369	303.463	279.365	281.129	313.865	333.562	276.954	250.21	257.632	347.67	257.4	296.884
ENSMUSG00000004105.8	Angptl2	chr2	33216069	33247717	31648	-0.128055	0.0768871	-1.6655	0.0958138	0.373349	0.0249118	0.0769319	0.323816	0.746077	0.984462	4997.66	5591.7	5490.52	5478.39	6222.59	5524.67	5141.14	5445.04	4767.45	5195.7	4582.45	5453.36	5304.5	5348.41	5855.81
ENSMUSG00000004110.15	Cacna1e	chr1	154390731	154884501	493770	-0.0418553	0.0544239	-0.769062	0.441856	0.744886	-0.0916499	0.0544308	-1.68379	0.0922231	0.597544	146119	141025	150543	141313	135113	141123	146549	148284	139346	155347	141500	155817	144072	149036	153246
ENSMUSG00000004113.18	Cacna1b	chr2	24603887	24763152	159265	-0.00267452	0.0644914	-0.041471	0.96692	0.988778	-0.0358009	0.0645133	-0.554938	0.578937	0.958546	35191.5	34360.1	35259.4	35640.6	35071.9	34180.3	32547.7	37041.4	33213.3	36293.2	34218.1	36647.8	31897.1	36469.1	36023.7
ENSMUSG00000004127.12	Trmt10a	chr3	138143448	138159821	16373	0.104978	0.1018	1.03122	0.302436	0.632125	0.0955293	0.102934	0.928066	0.353373	0.880311	290.371	288.221	267.799	296.996	267.004	265.585	323.298	284.771	311.383	306.591	258.74	276.786	286.805	276.396	231.21
ENSMUSG00000004151.17	Etv1	chr12	38779380	38870484	91104	0.0219802	0.116321	0.188962	0.850123	0.949053	0.0295855	0.116382	0.254212	0.799332	0.988088	3735.77	3758.16	3669.63	3347.67	4428.63	3150.69	4105.65	3564.49	3334.73	4740.92	3302.96	3599.18	4003.28	3616.89	3459.15
ENSMUSG00000004187.10	Kifc2	chr15	76660641	76668196	7555	0.0829736	0.0928151	0.893966	0.37134	0.691186	0.104396	0.0928792	1.124	0.261013	0.822279	5523.62	5613.02	5186.99	6196.56	6064.97	4844.42	5346.13	5220.22	5667.89	5730.19	5476.19	4491.79	5915.92	5274.32	5065.92
ENSMUSG00000004207.14	Psap	chr10	60277627	60302597	24970	0.0987715	0.0868735	1.13696	0.255556	0.58943	0.0306288	0.0869927	0.352084	0.724775	0.981672	4667.87	4435.84	4335.36	4651.56	3938.58	4058.94	5094.29	4331.52	4872.13	4602.95	4864.88	4003.34	4715.22	4287.46	4335.41
ENSMUSG00000004221.16	Ikbkg	chrX	74393290	74453854	60564	0.124862	0.0807299	1.54666	0.121945	0.420325	0.00960399	0.0810366	0.118514	0.90566	0.994941	2361.01	2168.14	2152.97	2247.65	1995.56	1989.38	2439.96	2264.06	2400.58	2164.53	2614.89	2132.88	2160.72	2179.82	2138.47
ENSMUSG00000004231.15	Pax2	chr19	44756045	44837871	81826	0.0769726	0.157355	0.489167	0.624724	NA	-0.00919201	0.155566	-0.0590875	0.952882	NA	9.84478	8.19618	8.38791	5.17415	10.7231	7.51655	9.37096	11.4614	8.87132	14.3076	4.73883	7.6619	10.1442	8.54833	7.19719
ENSMUSG00000005225.15	Plekha8	chr6	54595111	54645839	50728	0.0622211	0.0600792	1.03565	0.300365	0.630381	0.245798	0.0601537	4.08616	4.38569e-05	0.00570717	3163.25	3609.07	3025.43	3696.41	3451.75	3765.79	3522.31	3340.55	3006.49	3008.68	3297.28	3039.86	2904.94	3061.25	3095.69
ENSMUSG00000004263.15	Atn1	chr6	124742544	124756524	13980	-0.00286647	0.0714649	-0.0401102	0.968005	0.989005	-0.0695043	0.0717405	-0.968829	0.33263	0.867861	2711.76	2582.64	2717.74	2729.88	2771.91	2457.91	2370.85	2704	2747.45	2505.87	2889.74	2622.29	2804.42	2820	2624.28
ENSMUSG00000004264.17	Phb2	chr6	124712336	124716950	4614	0.0279639	0.124574	0.224477	0.822386	0.938311	0.0183501	0.124875	0.146948	0.883173	0.992997	653.657	648.189	638.47	756.461	546.876	554.972	734.449	594.228	725.674	692.896	601.831	477.911	729.462	676.268	670.238
ENSMUSG00000004266.15	Ptpn6	chr6	124720707	124738714	18007	0.0599233	0.134969	0.443977	0.657059	0.866893	-0.0854781	0.137336	-0.622401	0.533678	0.947724	92.1303	80.8455	87.2666	95.2044	70.7722	78.9238	78.4818	94.3359	85.1647	97.0871	91.9333	77.5768	82.9982	76.935	111.556
ENSMUSG00000004267.16	Eno2	chr6	124760053	124769673	9620	0.119926	0.0943003	1.27174	0.203465	0.532989	0.0430251	0.0943682	0.455928	0.648442	0.971456	7290.77	6877	6655.84	7639.11	5713.25	6359	7796.64	7217.14	7266.5	7067.94	7611.51	6044.28	7323.2	6737.03	6518.85
ENSMUSG00000004268.11	Emg1	chr6	124704085	124712178	8093	0.00357186	0.102712	0.0347756	0.972259	0.990275	-0.0253104	0.102961	-0.245824	0.805818	0.988088	1407.25	1375.74	1403.22	1654.69	1090.54	1285.33	1472.41	1386.83	1320.05	1385.79	1536.33	1327.42	1419.27	1395.28	1470.93
ENSMUSG00000004270.13	Lpcat3	chr6	124663027	124704418	41391	-0.0622682	0.0819401	-0.759923	0.4473	0.748825	-0.0972823	0.0822133	-1.18329	0.236694	0.807079	1992.17	1941.28	2086.24	1996.19	1863.67	2072.06	1833.19	2093.02	1792.01	1901.89	2181.76	2209.5	1894.2	2015.51	2225.73
ENSMUSG00000004285.12	Atp6v1f	chr6	29467718	29470512	2794	0.17298	0.118859	1.45535	0.145574	0.456689	0.106234	0.119984	0.885401	0.37594	0.890523	246.528	233.123	214.005	281.474	198.377	187.914	264.73	223.056	259.043	245.273	258.74	194.421	211.184	215.608	234.808
ENSMUSG00000004317.14	Clcn5	chrX	7153810	7319358	165548	0.117611	0.0847172	1.38828	0.165051	0.482365	-0.109769	0.0850365	-1.29084	0.196759	0.770988	2814.3	2375.22	2577.82	2178.32	2649.67	2312.59	2360.31	2658.16	2821.97	3217.16	2559.91	2517.89	2714.96	2417.28	2661.16
ENSMUSG00000004319.15	Clcn3	chr8	60910389	60983300	72911	-0.0461013	0.0532751	-0.865344	0.38685	0.703384	0.00438196	0.0533657	0.0821119	0.934558	0.996145	7692.64	7974.63	7949.14	7459.05	8214.94	8238.14	7986.4	7607.71	7652.4	7848.73	7661.74	8126.41	8310.88	7759.03	7600.23
ENSMUSG00000004328.15	Hif3a	chr7	17031507	17062427	30920	0.437482	0.152346	2.87163	0.00408358	0.0601797	0.120221	0.152919	0.786176	0.431764	0.914484	301.38	221.147	196.04	239.046	183.364	190.419	271.758	306.812	308.722	202.35	387.636	157.069	169.685	177.615	279.791
ENSMUSG00000004341.8	Gpx6	chr13	21312125	21319624	7499	0.0967345	0.163531	0.591537	0.55416	0.813744	0.0561106	0.163967	0.342206	0.732196	0.983716	56.0855	53.8493	50.1417	46.5673	33.2415	67.649	67.9394	69.6499	42.5823	42.9227	69.1869	45.0137	63.6319	37.0428	54.8786
ENSMUSG00000004347.16	Pde1c	chr6	56069804	56569103	499299	0.258083	0.122941	2.09924	0.0357957	0.220768	0.112197	0.122951	0.912535	0.361487	0.884534	35187.7	31191.6	28422.5	30772.7	31835.7	28366.2	33791.7	39137.1	30446.4	34663.2	36504.1	30051.9	19071.1	31818.8	32748.1
ENSMUSG00000004356.8	Utp20	chr10	88746607	88826804	80197	-0.0229645	0.0628726	-0.365255	0.714921	0.892751	-0.06272	0.0630921	-0.994103	0.320173	0.86006	3709.03	3603.81	3770.81	3701.59	3593.3	3401.24	3719.1	3651.77	3881.2	3858.96	3444.18	3892.25	3955.32	3607.4	3628.28
ENSMUSG00000004359.16	Spic	chr10	88674772	88685015	10243	-0.0350752	0.0965049	-0.363455	0.716265	NA	-0.0104078	0.0947818	-0.109808	0.912561	NA	1.56215	1.91831	2.07875	3.10449	2.14461	1.25276	1.17137	3.52658	1.77426	0	0.947766	0	2.76661	2.84944	2.69895
ENSMUSG00000004360.9	9330159F19Rik	chr10	29211606	29230779	19173	-0.228881	0.0652762	-3.50634	0.000454314	0.0135418	-0.209073	0.0653526	-3.19915	0.00137833	0.0626935	8057.86	8173.16	9504.54	8190.68	7856.79	8041.46	8603.71	7860.74	7347.23	8885.01	8138.46	9256.54	9419.37	9466.8	9875.44
ENSMUSG00000004364.14	Cul3	chr1	80264923	80340480	75557	-0.105607	0.0544164	-1.94073	0.0522914	0.272093	-0.144447	0.0545289	-2.649	0.00807315	0.188246	8688.21	8451.59	9367.15	7922.66	8354.34	8561.35	8968.01	8658.63	8386.95	8734.78	8972.5	9256.54	9653.61	9548.49	9009.98
ENSMUSG00000004366.3	Sst	chr16	23889581	23890844	1263	0.102394	0.166554	0.614781	0.538699	0.80412	0.045664	0.166562	0.274156	0.783964	0.985316	592.293	549.607	517.156	560.878	690.565	404.641	542.344	545.738	823.258	565.149	435.024	348.617	857.648	486.305	376.053
ENSMUSG00000004371.14	Il11	chr7	4772373	4782857	10484	-0.0575689	0.16248	-0.354314	0.723104	NA	0.00916031	0.161911	0.0565761	0.954883	NA	13.4623	15.4635	14.9859	8.27864	11.7954	30.0662	11.7137	11.4614	16.8555	12.2636	13.2687	20.1125	11.9886	16.1468	11.6954
ENSMUSG00000004383.18	Large1	chr8	72814599	73353540	538941	-0.214366	0.096558	-2.22008	0.0264135	0.187354	-0.205867	0.0965621	-2.13196	0.0330101	0.39009	83634.2	84178.9	98507.2	83432.1	89444.3	90778.7	73060.7	82150.7	89794.6	91713.6	70877.7	112255	92867.6	97879.3	91027.4
ENSMUSG00000004393.10	Ddx56	chr11	6258919	6267772	8853	0.0375218	0.107457	0.34918	0.726955	0.898245	0.0284626	0.108138	0.263206	0.792392	0.987776	429.802	426.864	417.419	484.3	347.427	389.608	486.118	460.218	432.92	386.305	439.763	388.842	431.59	391.324	457.921
ENSMUSG00000004394.12	Tmed4	chr11	6270369	6274870	4501	0.0794509	0.105405	0.753771	0.450987	0.750901	0.0411634	0.105688	0.389479	0.696922	0.977018	1212.08	1176.36	1139.24	1338.04	969.365	1067.35	1330.68	1187.57	1274.81	1114.97	1270.95	1018.08	1297.54	1164.47	1076.88
ENSMUSG00000004415.15	Col26a1	chr5	136741759	136883209	141450	-0.145626	0.140599	-1.03575	0.300319	0.630381	0.0624997	0.140617	0.444468	0.656704	0.971647	1498.31	1807.97	1709.34	1596.74	2477.03	1876.63	1281.48	1474.11	1815.96	1372.51	1330.66	1953.79	1504.11	1983.21	1396.25
ENSMUSG00000004446.12	Bid	chr6	120891930	120916853	24923	-0.0223628	0.122748	-0.182185	0.855438	0.951542	0.0825436	0.123141	0.67032	0.502654	0.941103	299.76	326.884	305.456	290.787	417.127	340.75	258.873	278.6	331.787	301.481	287.173	339.997	325.537	295.392	260.898
ENSMUSG00000004451.14	Ralb	chr1	119470305	119504794	34489	0.192029	0.112562	1.70598	0.0880111	0.35682	0.237235	0.112814	2.10288	0.0354762	0.401965	834.11	864.706	715.592	779.227	1040.14	894.47	744.991	798.77	864.954	847.213	825.504	659.882	790.327	829.188	582.972
ENSMUSG00000004455.16	Ppp1cc	chr5	122158278	122175273	16995	-0.0408136	0.118632	-0.344035	0.73082	0.900518	0.12375	0.118651	1.04298	0.29696	0.849947	4455.48	5094.52	4606.23	5070.67	4381.44	4498.66	6427.31	4834.94	4492.44	3859.98	4634.57	3830.95	4688.47	4350.15	5555.33
ENSMUSG00000004460.16	Dnajb11	chr16	22857845	22879634	21789	-0.0882456	0.140908	-0.626266	0.531141	0.799294	-0.206837	0.140996	-1.46698	0.142382	0.698041	1947.55	1748.83	2108.36	1725.06	1493.72	1406.85	2369.68	1720.97	1853.22	2406.74	1809.28	1702.86	2692.83	1722.96	2314.8
ENSMUSG00000004462.6	Tbccd1	chr16	22813215	22857569	44354	0.185966	0.0802597	2.31705	0.0205009	0.161584	0.0239596	0.0810147	0.295744	0.767426	0.984462	1097.14	973.809	956.838	1041.04	885.725	1018.49	949.981	1136.44	1118.67	992.333	1141.11	1045.85	944.335	955.513	881.656
ENSMUSG00000004473.10	Clec11a	chr7	44302687	44306902	4215	-0.114358	0.154367	-0.740822	0.458802	0.75416	0.0620617	0.154634	0.401347	0.688165	0.977018	72.2928	86.4773	81.2585	78.6471	114.737	93.9569	58.5685	74.0581	81.6161	63.3621	70.1347	66.0839	109.742	82.6339	66.574
ENSMUSG00000004500.9	Zfp324	chr7	12965838	12974236	8398	0.111432	0.0944521	1.17978	0.238089	0.571723	0.0518136	0.0955379	0.542336	0.587587	0.959837	422.693	403.886	388.287	410.827	386.03	377.08	441.606	393.213	440.905	415.942	440.711	348.617	452.801	384.675	367.057
ENSMUSG00000004508.6	Gab2	chr7	97081586	97308946	227360	-0.176145	0.128098	-1.37508	0.169108	0.487346	-0.0365687	0.128112	-0.285443	0.775305	0.984875	5906.47	6646.69	6855.1	5858.17	8712.49	7341.17	4674.94	5573.76	5903.86	6784.86	5363.41	7576.67	6389.94	6821.57	6632.21
ENSMUSG00000004530.12	Coro1c	chr5	113842436	113908758	66322	-0.105052	0.0877336	-1.1974	0.23115	0.565208	0.088778	0.0877694	1.01149	0.311781	0.855833	3330.42	3850.79	3602.89	3972.71	3849.58	3908.61	3672.24	3592.7	2950.6	3471.63	3306.75	3008.26	3971.92	3684.33	3747.04
ENSMUSG00000004535.12	Tax1bp1	chr6	52713729	52766780	53051	-0.0736338	0.0544362	-1.35266	0.176164	0.497781	0.0186133	0.0545113	0.341457	0.732759	0.983753	7265.99	7760.85	7657.31	7294.52	7510.43	7893.63	8344.84	7283.26	7277.14	7269.27	7234.29	7452.16	7789.84	7488.34	7898.92
ENSMUSG00000004540.7	Psg17	chr7	18813937	18821607	7670	-0.137431	0.107007	-1.28431	0.199033	NA	0.0337585	0.106429	0.317193	0.751097	NA	1.34037	4.62372	3.90145	10.3483	3.21692	3.75828	1.17137	3.52658	0.887132	0	0.947766	1.91548	1.8444	2.84944	8.99649
ENSMUSG00000004552.16	Ctse	chr1	131638306	131675505	37199	-0.0351864	0.166713	-0.21106	0.832841	NA	-0.0904297	0.166679	-0.542536	0.587449	NA	19.7713	18.195	20.7547	21.7314	15.0123	13.7803	22.256	22.9228	15.9684	18.3955	21.7986	14.3661	19.3662	30.3941	18.8926
ENSMUSG00000004558.14	Ndrg2	chr14	51905271	51913488	8217	0.0947358	0.151519	0.62524	0.531813	0.799749	-0.128544	0.151734	-0.847168	0.396901	0.899531	662.203	531.884	603.679	519.485	499.695	418.421	689.937	610.98	501.23	617.27	919.333	467.376	621.564	488.205	837.573
ENSMUSG00000004561.14	Mettl17	chr14	51884842	51893039	8197	-0.0385878	0.0751101	-0.513749	0.607427	0.842317	-0.116641	0.0757354	-1.54011	0.123533	0.667481	1146.4	1082.36	1179.35	1123.83	1018.69	973.393	1213.54	1105.58	1191.42	1119.06	1169.54	1157.91	1216.38	1200.57	1142.55
ENSMUSG00000004562.16	Arhgef40	chr14	51984719	52006251	21532	0.146059	0.111215	1.31331	0.18908	0.515224	-0.00868829	0.112038	-0.0775478	0.938188	0.996145	525.111	463.759	467.516	465.673	572.612	383.344	433.407	482.259	573.087	518.139	526.958	453.01	444.501	426.467	546.087
ENSMUSG00000004565.15	Pnpla6	chr8	3515384	3544267	28883	0.0618916	0.0686702	0.901289	0.367435	0.687735	0.095017	0.0688579	1.3799	0.167617	0.737083	2887.75	2956.53	2760.49	3140.71	3074.3	2618.27	2992.85	2793.05	2774.95	3011.75	2971.25	2652.93	2884.65	2714.57	2789.81
ENSMUSG00000004567.16	Mcoln1	chr8	3500457	3515232	14775	0.104053	0.072332	1.43854	0.150281	0.462093	0.190685	0.0724229	2.63294	0.00846504	0.19276	4250.71	4527.01	3940.02	5124.48	4422.19	4144.13	4417.23	4147.26	4454.29	4246.29	4155	3742.84	4207.08	3889.49	3920.67
ENSMUSG00000004568.12	Arhgef18	chr8	3393006	3456601	63595	0.116855	0.0879576	1.32854	0.184001	0.508049	0.0766173	0.0880428	0.870228	0.384176	0.894849	5813.52	5640.54	5325.73	5851.96	5498.79	5016.05	6195.37	6149.47	5638.61	5912.1	5553.91	4760.92	5451.13	4957.08	6133.81
ENSMUSG00000004591.16	Pkn2	chr3	142790902	142882004	91102	-0.119159	0.0580385	-2.05311	0.040062	0.234309	-0.0634017	0.0581327	-1.09064	0.275432	0.833632	6477.76	6742.26	7054.03	6312.46	6511.04	6906.46	7239.06	6518.88	6361.62	6639.74	6390.78	7182.08	7278.94	6683.84	7071.24
ENSMUSG00000004609.11	Cd33	chr7	43524216	43544428	20212	0.0496329	0.165161	0.300513	0.763786	0.914804	0.324694	0.165162	1.96591	0.0493094	0.461694	45.6459	63.4568	42.7379	51.7415	67.5553	51.3631	83.1672	48.4904	33.711	51.0985	49.2838	36.394	45.1879	22.7955	66.574
ENSMUSG00000004610.4	Etfb	chr7	43444083	43457800	13717	0.225135	0.0969349	2.32254	0.0202038	0.16063	-0.00438951	0.0980814	-0.0447537	0.964304	0.998383	613.815	514.812	517.034	566.052	485.755	469.785	537.659	600.4	610.347	536.534	707.981	534.418	460.179	549.943	523.596
ENSMUSG00000004626.14	Stxbp2	chr8	3630955	3643644	12689	0.0622451	0.0881838	0.705857	0.480277	0.768147	0.105995	0.0882759	1.20073	0.229856	0.803093	3815.23	3941.53	3640.9	4296.61	4012.57	3317.3	4139.62	3517.76	3949.51	4022.47	3771.16	3280.25	4005.12	3577.95	3700.26
ENSMUSG00000004630.18	Pcp2	chr8	3623371	3625545	2174	0.00420307	0.121157	0.0346912	0.972326	0.990275	-0.00639769	0.121923	-0.0524734	0.958152	0.998112	279.079	276.216	278.031	353.912	243.414	275.607	231.931	284.771	246.623	289.217	295.703	247.096	300.638	312.489	251.902
ENSMUSG00000017453.4	Pipox	chr11	77880615	77894096	13481	0.579889	0.132275	4.38398	1.16532e-05	0.000770388	0.353786	0.132813	2.66379	0.00772655	0.182912	583.548	480.852	353.766	587.783	333.487	442.224	559.915	564.252	495.907	642.819	631.212	411.827	308.938	353.331	340.967
ENSMUSG00000004633.17	Chn2	chr6	54039554	54301810	262256	0.171447	0.0986341	1.73821	0.082174	0.343764	0.287608	0.0986509	2.91541	0.00355223	0.116131	11405.3	12468.2	9998.08	11499	13427.4	11838.6	13107.6	11704.7	10548	11596.3	11772.2	8937.61	9000.69	9573.18	12480.8
ENSMUSG00000004637.15	Wwox	chr8	114439655	115352708	913053	-0.0424277	0.0977628	-0.433986	0.664298	0.870576	0.128051	0.0977669	1.30976	0.190276	0.762727	30739.1	35025.9	31754.6	32272.2	39777.2	37467.5	30586.8	29700	31068.2	33998.9	28189.4	35377.9	27693.7	30296.2	33650.5
ENSMUSG00000004642.13	Slbp	chr5	33634952	33652574	17622	0.237144	0.11054	2.14532	0.031927	0.209096	0.0605045	0.112168	0.539411	0.589603	0.96012	283.392	246.849	235.009	223.523	253.064	271.849	238.959	254.795	333.562	251.405	293.807	217.407	268.361	237.454	216.815
ENSMUSG00000004651.6	Tyr	chr7	87424771	87493512	68741	-0.174399	0.154006	-1.13242	0.25746	0.590519	-0.428813	0.156404	-2.74171	0.0061121	0.160809	47.5117	36.2197	56.3903	37.2539	33.2415	45.0993	29.2842	46.7272	52.3408	52.1205	38.8584	45.9714	48.8767	73.1357	57.5775
ENSMUSG00000004654.6	Ghrhr	chr6	55376295	55388530	12235	-0.000927679	0.0778786	-0.0119119	0.990496	NA	0.0341315	0.0763626	0.446966	0.6549	NA	0.899547	1.37613	0.923467	1.03483	3.21692	1.25276	0	1.76329	0.887132	0	0.947766	0	1.8444	0.949815	0.899649
ENSMUSG00000004655.5	Aqp1	chr6	55336432	55348555	12123	-0.0667302	0.135543	-0.492316	0.622496	NA	-0.00403407	0.134673	-0.0299546	0.976103	NA	7.22929	9.08288	9.17426	8.27864	8.57845	11.2748	8.19959	7.05316	15.0812	2.04394	4.73883	7.6619	11.9886	16.1468	0.899649
ENSMUSG00000004661.15	Arid3b	chr9	57790353	57836793	46440	-0.118865	0.0956115	-1.24321	0.21379	0.54513	-0.0242024	0.095648	-0.253036	0.800241	0.988088	6336.91	6811.25	6937.33	6513.22	6416.68	7785.9	6529.21	6555.03	5182.62	6723.54	6886.46	6190.82	7255.88	7205.29	7097.33
ENSMUSG00000004665.10	Cnn2	chr10	79988584	79996062	7478	-0.0335313	0.16023	-0.20927	0.834238	NA	-0.107068	0.158787	-0.674288	0.500128	NA	10.7912	9.12861	11.4713	12.418	10.7231	7.51655	5.85685	7.9348	10.6456	12.2636	12.321	10.5351	14.7552	15.197	5.39789
ENSMUSG00000004667.18	Polr2e	chr10	80035949	80039795	3846	0.0503799	0.128423	0.392297	0.694839	0.884234	-0.0101498	0.129106	-0.0786163	0.937338	0.996145	310.409	294.571	297.486	369.434	256.281	265.585	286.986	279.481	322.916	293.305	345.934	248.054	344.903	350.482	246.504
ENSMUSG00000004668.14	Abca13	chr11	9191942	9684259	492317	-0.341908	0.139871	-2.44445	0.0145075	0.131624	-0.166952	0.140338	-1.18965	0.234185	0.806112	82.6119	96.8794	112.506	102.448	108.303	106.484	70.2822	87.2828	79.8419	69.494	93.8288	138.872	94.0646	107.329	109.757
ENSMUSG00000004677.17	Myo9b	chr8	71272714	71360713	87999	-0.148183	0.0676237	-2.19129	0.0284311	0.195708	-0.0783054	0.0676764	-1.15705	0.24725	0.814621	8804.79	9260.52	9802.14	9992.32	9807.31	8238.14	9004.32	8758.26	8938.74	9004.58	8517.57	9286.23	9960.7	9866.67	10095
ENSMUSG00000004698.10	Hdac9	chr12	34047580	34917095	869515	-0.00866161	0.119033	-0.0727663	0.941992	0.981548	0.300335	0.119032	2.52313	0.0116314	0.230003	25412	32685.4	25592.2	31837.6	40778.7	32249.8	25875.6	23838.8	25771.2	31196.7	20841.4	27442.1	24827.5	26056.3	24043.1
ENSMUSG00000004707.14	Ly9	chr1	171588624	171607410	18786	-0.0154083	0.0733777	-0.209987	NA	NA	0.161098	0.0732952	2.19794	NA	NA	1.18673	18.7433	2.56199	5.17415	68.6276	0	1.17137	0.881644	0	1.02197	2.8433	1.91548	5.53321	1.89963	0.899649
ENSMUSG00000004709.14	Cd244	chr1	171559193	171609746	50553	-0.0117613	0.0874489	-0.134493	NA	NA	0.232661	0.0874274	2.66119	NA	NA	3.66496	39.2491	5.13581	8.27864	142.617	3.75828	2.34274	5.28987	2.6614	1.02197	5.68659	2.87321	9.22202	6.6487	1.7993
ENSMUSG00000004730.14	Adgre1	chr17	57358686	57483529	124843	-0.229168	0.125264	-1.82948	0.0673284	0.310135	-0.0732403	0.125973	-0.581396	0.560974	0.953707	104.04	118.535	125.857	125.214	121.171	134.045	93.7096	101.389	98.4716	107.307	108.993	127.379	142.019	104.48	129.549
ENSMUSG00000004748.5	Mtfp1	chr11	4091480	4095445	3965	0.115589	0.151248	0.764235	0.444727	0.747245	0.0230783	0.152337	0.151495	0.879585	0.992567	89.6906	82.1535	80.3309	73.4729	91.146	90.1986	73.7963	87.2828	117.989	77.6697	75.8212	72.7881	98.6756	94.9815	54.8786
ENSMUSG00000004768.14	Rab23	chr1	33719887	33742564	22677	0.0433964	0.0812052	0.534404	0.593062	0.834243	0.058054	0.0815538	0.711849	0.476558	0.934688	1307.77	1322.62	1266.95	1332.86	1345.74	1401.84	1210.02	1418.57	1292.55	1146.65	1373.31	1272.83	1364.86	1246.16	1183.94
ENSMUSG00000004771.12	Rab11a	chr9	64715299	64737758	22459	-0.0366326	0.0656514	-0.557987	0.576853	0.826303	-0.0467239	0.0659037	-0.708972	0.478342	0.935156	2726.55	2707.86	2800.12	2660.55	2587.48	2948.99	2634.41	2881.21	2640.1	2540.62	2844.24	2904.82	2700.21	2803.85	2791.61
ENSMUSG00000004788.11	Eif2b2	chr12	85219481	85226628	7147	0.163528	0.101565	1.61008	0.107379	0.394818	0.0267477	0.102808	0.260171	0.794732	0.988032	404.712	363.845	356.44	373.574	346.355	321.959	413.493	375.581	401.871	401.634	439.763	331.377	406.691	313.439	374.254
ENSMUSG00000004789.10	Dlst	chr12	85110833	85134845	24012	-0.0560336	0.0659974	-0.849027	0.395866	0.710532	0.0199659	0.0661152	0.301986	0.762662	0.984462	3943.94	4167.31	4106.85	4163.12	3837.78	4258.13	4410.21	4047.63	3825.31	3816.04	4086.77	3748.59	4201.55	4170.64	4306.62
ENSMUSG00000004791.7	Pgf	chr12	85166635	85177790	11155	0.236318	0.157457	1.50084	0.133397	NA	0.285767	0.156594	1.8249	0.0680168	NA	12.2774	13.5048	7.19542	8.27864	18.2292	8.76931	18.7419	8.81644	12.4198	18.3955	9.47766	5.74643	11.9886	4.74907	6.29754
ENSMUSG00000004798.14	Ulk2	chr11	61775649	61855073	79424	-0.024832	0.0779693	-0.318484	0.750118	0.90946	0.00370275	0.0780218	0.0474579	0.962148	0.998202	8753.41	8939.56	8915.16	8665.67	9242.21	9733.93	8116.42	8918.71	8840.27	8714.34	8540.32	10123.3	8224.2	8948.2	8364.93
ENSMUSG00000004815.12	Dgkq	chr5	108646693	108669672	22979	0.0490068	0.0765731	0.64	0.522172	0.793501	0.0791657	0.0767413	1.03159	0.302263	0.853141	2787.9	2849.93	2689.39	2877.86	2920.96	2586.95	3013.93	2691.66	2978.1	2845.16	2636.68	2479.58	2926.15	2823.8	2528.01
ENSMUSG00000004821.1	Tmed11	chr5	108777235	108795363	18128	-0.0791256	0.108815	-0.727161	0.467127	NA	0.0635801	0.107913	0.589179	0.555741	NA	1.61578	3.90047	2.83625	4.13932	5.36153	3.75828	2.34274	2.64493	1.77426	2.04394	0	5.74643	0	3.79926	1.7993
ENSMUSG00000004837.2	Grap	chr11	61653265	61672784	19519	-0.0011749	0.116439	-0.0100903	0.991949	NA	0.00192931	0.115239	0.0167418	0.986643	NA	5.08992	5.23033	5.13037	2.06966	3.21692	6.26379	9.37096	9.69809	0.887132	4.08788	5.68659	10.5351	3.68881	0	6.29754
ENSMUSG00000004842.18	Pou1f1	chr16	65520511	65535005	14494	0.0224492	0.162224	0.138384	0.889937	NA	0.0234943	0.161359	0.145603	0.884235	NA	12.7777	12.9689	12.2307	9.31347	10.7231	21.2969	10.5423	14.1063	12.4198	12.2636	12.321	6.70417	15.6774	8.54833	17.993
ENSMUSG00000004843.6	Chmp2b	chr16	65539133	65562697	23564	0.00694154	0.0695426	0.099817	0.92049	0.974595	0.0531277	0.0699164	0.759874	0.44733	0.921471	1335.55	1381.92	1329.12	1328.72	1315.72	1341.7	1541.52	1370.08	1364.41	1245.78	1361.94	1302.52	1365.78	1287	1361.17
ENSMUSG00000004846.10	Plod3	chr5	136987019	136996648	9629	-0.0422637	0.122391	-0.345317	0.729856	0.899932	0.088631	0.12253	0.723344	0.469468	0.932109	726.491	808.941	751.95	904.441	787.073	709.061	835.187	707.079	676.882	833.927	688.078	549.742	935.113	712.361	810.584
ENSMUSG00000004849.14	Ap1s1	chr5	137034993	137046135	11142	0.0392816	0.0846715	0.463929	0.642698	0.859036	0.00417002	0.0850826	0.0490114	0.96091	0.998112	1254.95	1222.01	1218.44	1252.14	1181.68	1084.89	1369.33	1246.65	1127.54	1284.62	1360.99	1155.03	1170.27	1255.65	1292.8
ENSMUSG00000004864.12	Mapk13	chr17	28769307	28778698	9391	0.132662	0.158741	0.835708	0.403319	NA	-0.0251252	0.156934	-0.1601	0.872802	NA	12.4347	8.99587	9.60692	12.418	6.43384	11.2748	5.85685	7.9348	11.5327	12.2636	18.0075	11.4929	11.9886	10.448	4.49824
ENSMUSG00000017561.16	Crlf3	chr11	80046493	80080991	34498	0.357819	0.0877458	4.0779	4.54442e-05	0.00234033	0.165205	0.0884708	1.86734	0.0618547	0.510336	1072.97	929.322	820.769	911.685	920.039	968.382	917.182	1135.56	999.798	970.871	1185.65	856.218	719.317	800.694	906.846
ENSMUSG00000004872.15	Pax3	chr1	78101267	78197134	95867	-0.094867	0.0999257	-0.949375	0.34243	NA	-0.105126	0.0981595	-1.07097	0.284184	NA	1.90232	1.6596	3.44076	2.06966	2.14461	1.25276	1.17137	0	1.77426	2.04394	3.79106	0	2.76661	3.79926	7.19719
ENSMUSG00000004880.11	Lbr	chr1	181815335	181843046	27711	-0.01973	0.081827	-0.241119	0.809463	0.933417	0.152783	0.0820121	1.86293	0.0624718	0.512706	913.8	1039.16	927.753	1005.85	1087.32	1092.41	971.065	1003.31	968.748	847.213	835.929	867.711	992.289	945.065	905.946
ENSMUSG00000004885.5	Crabp2	chr3	87948666	87953376	4710	0.0460887	0.164395	0.280354	0.779206	0.922512	0.0980572	0.164723	0.595285	0.551653	0.951999	40.5601	42.9787	38.2503	53.8112	32.1692	42.5938	43.3407	20.2778	39.0338	47.0106	55.9182	40.225	33.1993	41.7918	37.7852
ENSMUSG00000004891.16	Nes	chr3	87971078	87980451	9373	0.0716496	0.124489	0.575548	0.564921	NA	-0.0550498	0.122826	-0.448192	0.654014	NA	8.45171	4.93026	6.38112	4.13932	3.21692	10.0221	2.34274	7.05316	4.43566	7.15379	15.1642	1.91548	2.76661	2.84944	17.993
ENSMUSG00000004892.13	Bcan	chr3	87987531	88000230	12699	0.182061	0.151069	1.20515	0.228146	0.562458	0.199129	0.151129	1.3176	0.187636	0.760766	1144.2	1162.99	957.526	967.566	1683.52	777.963	1222.91	934.543	1168.35	1217.17	1256.74	740.332	940.646	849.134	1299.99
ENSMUSG00000004894.10	Hapln2	chr3	88021750	88027583	5833	-0.151067	0.162612	-0.929003	0.352887	0.674967	0.0370185	0.162749	0.227458	0.820067	0.988667	52.3882	64.9767	62.2685	58.9853	73.9891	42.5938	84.3386	62.5968	56.7764	54.1644	36.0151	45.9714	58.0987	54.1394	90.8645
ENSMUSG00000004895.9	Prcc	chr3	87858903	87885608	26705	-0.102789	0.0587018	-1.75103	0.0799401	0.338562	-0.0933481	0.059002	-1.58212	0.113623	0.647125	2453.19	2470.39	2640.26	2364.59	2382.66	2563.14	2571.16	2450.09	2333.16	2476.23	2553.28	2742	2556.34	2550.25	2712.44
ENSMUSG00000004896.16	Rrnad1	chr3	87922601	87930717	8116	0.0451618	0.0830279	0.543935	0.586486	0.830583	0.0619796	0.0832305	0.744673	0.456469	0.925664	2156.88	2183.65	2085.46	2314.91	1958.03	1981.86	2479.79	2086.85	2118.47	2217.67	2204.5	1922.18	2230.81	2063	2125.87
ENSMUSG00000004897.16	Hdgf	chr3	87906321	87916132	9811	-0.0450475	0.0903914	-0.49836	0.61823	0.846573	-0.0610846	0.0907037	-0.673452	0.50066	0.940876	1374.42	1357.55	1421.83	1434.27	1328.59	1173.83	1493.5	1376.25	1369.73	1296.88	1454.82	1230.69	1585.26	1424.72	1446.64
ENSMUSG00000004902.7	Slc25a18	chr6	120773578	120794336	20758	0.0346349	0.0873321	0.396588	0.691671	0.882685	0.0168401	0.0879912	0.191383	0.848225	0.991148	694.206	684.916	676.153	661.256	685.204	673.984	719.221	607.453	721.238	704.137	743.996	676.163	601.276	670.569	756.605
ENSMUSG00000004929.12	Thop1	chr10	81070035	81082559	12524	0.171474	0.0839373	2.04289	0.0410637	0.23767	0.0995679	0.0849517	1.17205	0.241176	0.809503	581.216	550.858	511.907	575.365	560.816	524.906	542.344	584.53	609.46	550.842	580.033	475.996	553.321	560.391	457.921
ENSMUSG00000004931.11	Apba3	chr10	81266960	81273246	6286	0.0686511	0.124595	0.550993	0.581639	0.828407	0.170799	0.125052	1.36583	0.171994	0.746978	251.056	272.844	236.895	309.414	290.595	243.035	248.33	253.032	245.736	291.261	214.195	197.294	299.716	235.554	215.016
ENSMUSG00000004933.17	Matk	chr10	81252935	81263365	10430	0.0713477	0.100488	0.710013	0.477696	0.766775	0.058389	0.100587	0.580484	0.561588	0.953707	3525.1	3489.8	3336.11	3890.96	2997.1	3220.84	3850.29	3314.98	3599.09	3672.96	3513.37	2785.1	3756.13	3220.82	3582.4
ENSMUSG00000004934.14	Pias4	chr10	81153266	81167923	14657	0.143408	0.0808393	1.77399	0.076064	0.329194	0.209621	0.0814449	2.57378	0.0100594	0.213071	595.726	625.252	535.731	691.266	610.142	578.775	620.826	627.731	583.733	574.347	597.092	517.179	536.721	502.452	586.571
ENSMUSG00000004936.8	Map2k1	chr9	64185770	64253631	67861	0.0295289	0.0782207	0.377507	0.705797	0.888845	-0.0768303	0.0783168	-0.981019	0.326583	0.86458	7728.65	7146.85	7562.49	6855.75	7253.08	7849.79	6628.78	8125.23	6987.94	7717.92	8083.49	7944.44	6774.49	7911.01	7620.02
ENSMUSG00000004937.6	Sgta	chr10	81044075	81060181	16106	0.0248885	0.0839324	0.29653	0.766826	0.915935	0.120592	0.0841514	1.43303	0.151849	0.715388	1325.32	1422.37	1301	1543.97	1459.41	1210.16	1475.93	1373.6	1282.79	1300.97	1343.93	1194.3	1437.71	1309.79	1262.21
ENSMUSG00000004939.7	Nmrk2	chr10	81198170	81202051	3881	-0.0717885	0.163563	-0.438905	0.66073	NA	0.0381787	0.163203	0.233934	0.815036	NA	15.2516	18.5352	17.2558	15.5224	11.7954	17.5386	29.2842	14.1063	10.6456	16.3515	19.9031	9.57738	23.055	24.6952	11.6954
ENSMUSG00000004945.15	Tmem242	chr17	5410870	5440259	29389	0.226994	0.0643844	3.52561	0.000422502	0.0127482	0.0782457	0.0650876	1.20216	0.229302	0.802187	1562.19	1403.96	1327.02	1449.8	1357.54	1399.33	1409.16	1618.7	1653.61	1403.16	1573.29	1333.17	1324.28	1333.54	1317.09
ENSMUSG00000004947.15	Dtx2	chr5	135994800	136032872	38072	-0.0250745	0.0677669	-0.370011	0.711374	0.891348	-0.0377668	0.0682061	-0.553715	0.579774	0.958546	1510.43	1496.76	1538.35	1539.83	1481.93	1577.22	1388.07	1571.09	1431.83	1452.22	1586.56	1593.68	1440.48	1587.14	1532.1
ENSMUSG00000004948.12	Zp3	chr5	135980099	135988624	8525	0.0411584	0.121138	0.339764	0.734034	NA	0.052531	0.119522	0.439511	0.660291	NA	4.28183	4.45536	3.52322	2.06966	9.65076	3.75828	2.34274	4.40822	1.77426	7.15379	3.79106	2.87321	0.922202	7.59852	2.69895
ENSMUSG00000004951.10	Hspb1	chr5	135887919	135889563	1644	-0.138207	0.0937145	-1.47477	0.140275	NA	-0.134606	0.0919437	-1.464	0.143193	NA	1.13923	1.16695	3.21981	0	1.07231	1.25276	2.34274	0	2.6614	0	1.89553	1.91548	2.76661	1.89963	6.29754
ENSMUSG00000004952.13	Rasa4	chr5	136083916	136111860	27944	0.0300557	0.147123	0.20429	0.838127	0.944545	-0.062919	0.147947	-0.42528	0.670633	0.973773	146.922	134.2	142.591	128.319	172.641	150.331	85.51	140.181	125.086	198.262	124.157	143.661	144.786	142.472	139.446
ENSMUSG00000004961.7	Syt5	chr7	4539765	4547541	7776	0.0653752	0.0852696	0.766688	0.443267	0.74623	-0.00136512	0.0856708	-0.0159344	0.987287	0.998383	1417.25	1348.14	1349.52	1464.28	1198.84	1354.23	1375.19	1320.7	1393.68	1494.12	1460.51	1198.13	1477.37	1435.17	1287.4
ENSMUSG00000004980.16	Hnrnpa2b1	chr6	51460932	51469894	8962	-0.00405089	0.0798402	-0.0507375	0.959535	0.98653	-0.0590988	0.0799436	-0.739256	0.459752	0.927294	5901.88	5667.28	5919.45	5489.77	5148.14	5535.94	6495.24	5891.15	6033.38	5820.12	5862.88	5246.49	6104.05	6000.93	6326.33
ENSMUSG00000004988.9	Fxyd4	chr6	117933559	117937692	4133	-0.225193	0.106577	-2.11296	0.0346043	0.217596	-0.0407063	0.10684	-0.381001	0.703202	0.977602	338.117	390.906	403.302	331.146	467.526	433.455	331.498	334.143	339.772	364.843	313.71	399.377	397.469	416.019	400.344
ENSMUSG00000004994.12	Ccdc130	chr8	84257795	84270380	12585	-0.00349508	0.0771034	-0.0453298	0.963844	0.988114	-0.012624	0.0776711	-0.162532	0.870887	0.992432	954.027	947.248	956.467	1070.01	877.147	908.25	933.582	918.673	1004.23	920.795	972.407	896.443	970.156	950.764	1008.51
ENSMUSG00000004996.9	Mri1	chr8	84249906	84257326	7420	-0.200809	0.0916343	-2.19142	0.0284214	0.195708	0.0930807	0.0916086	1.01607	0.309596	0.854534	829.696	1036.32	965.96	1112.44	933.979	1005.97	1092.89	759.977	986.491	782.829	789.489	909.851	1011.66	987.807	954.527
ENSMUSG00000005034.15	Prkacb	chr3	146729574	146812990	83416	-0.197187	0.0910108	-2.16663	0.0302628	0.202858	0.0525559	0.0910132	0.577454	0.563633	0.953707	15293.4	18464.2	17746.4	18165.4	17138.7	17478.5	21074.1	15241.9	15709.3	16619.3	13603.3	15666.7	19984.1	17243.9	18091
ENSMUSG00000005043.13	Sgsh	chr11	119343425	119355536	12111	0.134228	0.166718	0.805121	0.42075	NA	-0.105286	0.16661	-0.631931	0.527432	NA	24.0764	17.0127	20.1174	20.6966	16.0846	12.5276	18.7419	16.7512	30.1625	27.5932	21.7986	23.9435	11.9886	25.645	18.8926
ENSMUSG00000005045.16	Chd5	chr4	152338651	152390194	51543	-0.138105	0.0897001	-1.53963	0.123652	0.422762	-0.0349584	0.0897457	-0.389527	0.696886	0.977018	5428.4	5865.93	6022.55	6117.91	6268.7	5941.83	5135.28	5235.2	5691.84	6005.1	4781.48	5827.84	6555.01	6289.67	5417.68
ENSMUSG00000005054.7	Cstb	chr10	78425669	78427622	1953	0.0916853	0.158832	0.577246	0.563774	0.819167	-0.112794	0.160795	-0.701476	0.483006	NA	36.2127	28.7608	32.8207	35.1842	28.9523	26.3079	24.5988	31.7392	40.8081	42.9227	29.3807	32.5631	36.8881	29.4443	32.3874
ENSMUSG00000005057.13	Sh2b2	chr5	136218147	136246556	28409	-0.0922436	0.144926	-0.636486	0.52446	0.794897	0.0844813	0.14518	0.581906	0.56063	0.953558	126.831	149.134	138.234	163.503	196.232	129.034	107.766	128.72	145.49	143.076	90.0377	134.083	146.63	146.271	125.951
ENSMUSG00000005069.12	Pex5	chr6	124396816	124415067	18251	-0.0885497	0.0798187	-1.10938	0.267264	0.599911	-0.0314264	0.0801515	-0.392087	0.694994	0.977018	1158.71	1208.42	1237.37	1190.05	1279.26	1089.9	1274.45	1170.82	1185.21	1114.97	1163.86	1257.51	1142.61	1392.43	1156.95
ENSMUSG00000005078.16	Jkamp	chr12	72085589	72101461	15872	0.0432286	0.0725984	0.595449	0.551543	0.812505	0.0626782	0.0729607	0.859068	0.390303	0.896894	1462.05	1483.28	1416.58	1510.85	1385.42	1524.61	1512.24	1473.23	1376.83	1388.86	1609.31	1304.44	1486.59	1448.47	1426.84
ENSMUSG00000005087.17	Cd44	chr2	102811141	102901665	90524	0.275396	0.118171	2.3305	0.01978	0.158309	0.139166	0.119139	1.1681	0.242767	0.80981	362.88	325.623	290.182	274.23	302.39	390.861	335.012	372.936	375.257	353.602	349.725	287.321	361.503	272.597	239.307
ENSMUSG00000005089.15	Slc1a2	chr2	102658659	102790784	132125	-0.283328	0.137018	-2.06782	0.0386568	0.230501	-0.0703898	0.137019	-0.513724	0.607445	0.961843	24304.9	29347.4	31222.7	26845.6	27927.1	37214.4	25402.3	20152.6	29188.4	29096.5	18781.9	32568.8	38709.4	27809.6	25802.8
ENSMUSG00000005102.13	Eif2ak4	chr2	118388618	118475234	86616	0.104658	0.079137	1.32249	0.186005	0.510868	0.141492	0.0792053	1.7864	0.0740345	0.548183	6349.67	6524.3	5878.36	6404.56	7409.64	6509.33	5773.68	6290.53	6865.51	6283.07	5959.55	6264.56	5656.79	5912.6	5679.48
ENSMUSG00000005103.12	Wdr1	chr5	38526813	38563221	36408	-0.255521	0.119513	-2.13801	0.0325159	0.211223	0.04805	0.119501	0.402087	0.68762	0.977018	1496.05	1917.78	1843.76	1824.41	1964.47	2114.66	1767.6	1608.12	1611.03	1585.08	1179.97	1486.41	2347.93	1817	1723.73
ENSMUSG00000005107.13	Slc2a9	chr5	38349273	38503143	153870	0.055727	0.155757	0.357782	0.720506	0.895368	0.113154	0.15597	0.725484	0.468155	0.93151	195.267	207.008	184.61	241.115	236.98	211.716	138.222	187.79	259.93	192.13	141.217	246.139	167.841	198.511	125.951
ENSMUSG00000005124.9	Wisp1	chr15	66891320	66923201	31881	-0.324842	0.165558	-1.9621	0.0497511	0.264668	-0.201726	0.16555	-1.21852	0.223026	0.795126	399.776	489.585	665.241	575.365	498.622	432.202	452.149	403.793	450.663	570.259	174.389	527.714	1075.29	646.824	411.139
ENSMUSG00000005125.12	Ndrg1	chr15	66929321	66969640	40319	-0.267283	0.163782	-1.63195	0.10269	0.386134	0.0260207	0.163776	0.158879	0.873764	0.992432	188.821	266.73	258.828	313.553	272.366	191.672	289.328	249.505	155.248	233.009	117.523	178.139	266.516	179.515	411.139
ENSMUSG00000005131.4	4930550C14Rik	chr9	53402325	53434402	32077	0.174735	0.127414	1.3714	0.170251	0.488819	0.102888	0.129784	0.79276	0.427918	0.913909	93.536	87.882	80.7052	93.1347	92.2184	87.6931	78.4818	82.8746	97.5845	96.0652	97.6199	87.1542	87.6092	77.8848	70.1726
ENSMUSG00000005142.10	Man2b1	chr8	85083270	85098282	15012	-0.0730566	0.076093	-0.960096	0.337007	0.660734	0.049188	0.0762461	0.645121	0.518849	0.944988	1869.71	2044.83	1972.65	2206.26	2022.37	1924.24	2026.47	2008.39	1781.36	1793.56	1895.53	1751.7	2021.47	1987.96	2129.47
ENSMUSG00000005148.7	Klf5	chr14	99298691	99313405	14714	0.331685	0.100954	3.28552	0.00101795	0.0241506	0.27648	0.101223	2.73139	0.00630684	0.162998	1496.11	1433.76	1157.82	1394.95	1377.91	1276.56	1685.6	1347.15	1503.69	1478.79	1654.8	962.527	1234.83	1233.81	1200.13
ENSMUSG00000005150.16	Wdr83	chr8	85075035	85081306	6271	0.171831	0.0730879	2.35103	0.0187218	0.154101	0.124911	0.0735737	1.69777	0.0895512	0.588843	1392.32	1344.77	1228.22	1505.68	1281.41	1276.56	1315.45	1313.65	1487.72	1415.43	1352.46	1280.5	1190.56	1247.11	1194.73
ENSMUSG00000005161.15	Prdx2	chr8	84969587	84974834	5247	0.0391048	0.106557	0.366986	0.713629	0.892029	0.0276896	0.107032	0.258702	0.795865	0.988032	635.529	629.951	616.421	658.152	540.442	557.478	763.733	604.808	648.493	572.303	716.511	584.22	679.663	610.731	591.069
ENSMUSG00000005198.15	Polr2a	chr11	69733997	69758637	24640	0.211409	0.086187	2.45291	0.0141705	0.130205	0.182225	0.0864136	2.10876	0.0349656	0.399402	2175.48	2129.02	1858.21	2231.09	1956.96	2124.68	2203.35	2249.96	2267.51	2011.24	2173.23	2106.07	1723.6	1977.51	1625.67
ENSMUSG00000005204.12	Senp3	chr11	69673115	69682084	8969	-0.0288113	0.0820243	-0.351254	0.725398	0.897421	0.00356496	0.0821761	0.043382	0.965397	0.998383	2744.02	2810.81	2803.14	2796.11	2668.97	2737.28	3040.88	2704	2656.07	2617.27	2998.73	2486.29	3188.05	2810.5	2727.74
ENSMUSG00000005220.10	Corin	chr5	72300025	72504473	204448	0.141215	0.156672	0.90134	0.367407	0.687735	0.433462	0.156657	2.76694	0.00565845	0.155206	163.629	220.189	141.137	223.523	331.343	184.156	141.736	189.554	151.7	163.515	149.747	196.336	119.886	119.677	128.65
ENSMUSG00000005716.16	Pvalb	chr15	78191114	78206400	15286	0.13689	0.137692	0.994174	0.320138	0.647065	0.613974	0.137478	4.46597	7.97062e-06	0.00144565	362.369	551.031	320.583	490.509	772.061	447.235	494.318	318.274	450.663	379.151	301.389	292.11	316.315	359.03	314.877
ENSMUSG00000005232.11	G6pc2	chr2	69211073	69227841	16768	-0.0287821	0.0937851	-0.306895	0.758924	NA	-0.109696	0.0915109	-1.19872	0.230639	NA	2.12273	0.839974	2.54255	1.03483	1.07231	1.25276	0	0.881644	1.77426	2.04394	3.79106	1.91548	6.45541	0	1.7993
ENSMUSG00000005233.16	Spc25	chr2	69193895	69206194	12299	-0.409033	0.166317	-2.45936	0.0139185	NA	-0.292184	0.166072	-1.75938	0.078513	NA	10.9827	13.2212	20.061	14.4876	10.7231	11.2748	16.3992	7.9348	13.307	12.2636	10.4254	19.1548	24.8994	20.8959	15.294
ENSMUSG00000005237.14	Dnah2	chr11	69420809	69549110	128301	-0.293292	0.137337	-2.13556	0.0327151	0.211678	-0.181902	0.137445	-1.32345	0.185686	0.759733	674.012	744.089	873.32	718.172	795.651	785.48	677.052	570.424	719.464	661.215	744.944	663.712	802.316	738.956	1288.3
ENSMUSG00000005251.14	Ripk4	chr16	97741933	97763737	21804	0.271557	0.164764	1.64816	0.0993203	0.379157	-0.14866	0.165835	-0.896434	0.370021	NA	37.1068	22.101	26.9699	16.5573	22.5184	20.0441	29.2842	32.6208	40.8081	40.8788	34.1196	28.7321	37.8103	16.1468	25.1902
ENSMUSG00000005262.12	Ufd1	chr16	18811779	18835261	23482	0.129894	0.0649486	1.99994	0.0455064	0.251465	0.0643481	0.0651686	0.987411	0.323441	0.86214	3875.64	3696.78	3529.13	3739.88	3556.84	3490.19	4000.23	3746.99	4057.74	3616.75	4081.08	3558	3639.01	3429.78	3489.74
ENSMUSG00000005267.13	Zfp287	chr11	62700356	62731905	31549	0.151414	0.0614042	2.46586	0.0136683	0.127452	0.0880807	0.0618163	1.42488	0.154192	0.720995	2204.74	2107.99	1978.01	1998.26	2068.48	2192.33	2172.89	2209.4	2271.06	2018.39	2320.13	1982.52	1989.19	1990.81	1949.54
ENSMUSG00000005268.20	Prlr	chr15	10177238	10349180	171942	-0.333592	0.150791	-2.21229	0.0269467	0.189367	-0.3052	0.15069	-2.02535	0.0428315	0.432937	83.6029	90.3463	181.693	73.4729	135.111	80.1766	72.6249	78.4664	51.4537	166.581	37.9106	113.971	94.0646	197.561	321.175
ENSMUSG00000005299.6	Letm1	chr5	33739673	33782817	43144	-0.021672	0.0569022	-0.380864	0.703304	0.887641	-0.0250191	0.0571969	-0.437421	0.661806	0.971647	2739.21	2732.17	2782.32	2904.77	2703.28	2564.4	2756.23	2866.23	2725.27	2624.42	2740.94	2693.16	2819.17	2801.95	2815
ENSMUSG00000005312.15	Ubqln1	chr13	58176156	58215653	39497	-0.113063	0.0765074	-1.4778	0.139462	0.446918	-0.091442	0.0766214	-1.19343	0.232702	0.804875	4270.95	4340.05	4640.58	4267.64	3935.36	4625.19	4532.03	4459.36	4027.58	4041.89	4554.96	4563.62	4267.03	4670.24	5061.42
ENSMUSG00000005320.9	Fgfr4	chr13	55152640	55168759	16119	-0.0342867	0.152654	-0.224604	0.822288	NA	0.0835656	0.151821	0.550422	0.58203	NA	7.27105	9.55518	7.83759	10.3483	9.65076	10.0221	8.19959	8.81644	4.43566	9.19773	6.63436	5.74643	4.61101	5.69889	15.294
ENSMUSG00000005338.13	Cadm3	chr1	173333258	173367695	34437	-0.172178	0.0738204	-2.33239	0.0196802	0.158039	-0.0884905	0.0738643	-1.19801	0.230911	0.803893	8673.36	9220.78	9836.81	9387.98	9029.89	9966.95	8498.29	8877.28	8376.3	8693.9	8745.98	10656.8	9750.44	10266.5	8673.51
ENSMUSG00000005354.15	Txn2	chr15	77915047	77929006	13959	0.10262	0.0764025	1.34316	0.179221	0.50214	0.0138407	0.0770421	0.179651	0.857426	0.991989	1132.18	1061.59	1050.1	1027.59	967.22	1102.43	1149.11	1166.42	1130.21	1072.05	1160.07	953.907	1126.01	1039.1	1081.38
ENSMUSG00000005357.9	Slc1a6	chr10	78780496	78814765	34269	0.019574	0.0726421	0.269458	0.787577	0.926067	-0.00975733	0.0732421	-0.13322	0.894019	0.993536	1064.47	1040.92	1049.25	1085.54	1084.1	943.327	1050.72	1055.33	985.604	1072.05	1144.9	1064.05	1063.3	1081.84	987.814
ENSMUSG00000005360.14	Slc1a3	chr15	8634124	8710764	76640	-0.0278407	0.149666	-0.186019	0.85243	0.950285	-0.0448693	0.149647	-0.299833	0.764304	0.984462	667.415	639.376	714.401	563.982	554.382	443.477	995.664	606.571	461.309	444.557	1157.22	375.433	577.298	346.682	1558.19
ENSMUSG00000005362.14	Crbn	chr6	106780201	106800077	19876	0.101582	0.0689683	1.47288	0.140783	0.44855	-0.00415	0.0692978	-0.0598865	0.952246	0.997627	2696.61	2497.88	2505.26	2449.44	2318.33	2425.34	2798.4	2629.06	2760.75	2611.13	2785.48	2627.08	2463.2	2551.2	2379.57
ENSMUSG00000005364.11	Il5ra	chr6	106710357	106749037	38680	-0.119252	0.141198	-0.844569	0.398351	0.712462	0.217718	0.141126	1.54272	0.122898	0.666842	292.671	396.976	326.215	312.519	512.562	454.751	308.07	277.718	249.284	289.217	354.464	414.701	302.482	293.493	294.185
ENSMUSG00000005370.3	Msh6	chr17	87975050	87990883	15833	0.0959811	0.0701564	1.3681	0.17128	0.490459	-0.00359962	0.0708945	-0.0507742	0.959505	0.998112	1147.3	1066.95	1069.64	1054.49	1036.92	1027.26	1149.11	1197.27	1036.17	1195.7	1160.07	1020.95	1095.58	1076.14	1085.88
ENSMUSG00000005371.14	Fbxo11	chr17	87990859	88065291	74432	-0.152261	0.0850705	-1.78982	0.0734833	0.32351	-0.0734702	0.0850895	-0.863447	0.387892	0.89626	16497	17495.5	18479.4	16450.7	17533.3	20113	15884.9	17171.8	14871	16501.7	17443.6	18745.8	16635.6	19038.1	19498.1
ENSMUSG00000005373.13	Mlxipl	chr5	135089890	135138382	48492	-0.000604115	0.165879	-0.00364191	0.997094	0.998909	0.29042	0.165888	1.75071	0.0799967	NA	29.2421	45.4742	29.2826	40.3584	50.3984	32.5717	58.5685	35.2658	28.3882	16.3515	36.9629	20.1125	18.444	22.7955	55.7782
ENSMUSG00000005374.13	Tbl2	chr5	135149657	135165760	16103	0.204241	0.0827991	2.46671	0.0136361	0.127301	-0.0184497	0.083929	-0.219825	0.826007	0.989694	809.201	686.764	695.66	678.848	603.709	761.677	702.822	780.255	864.954	748.082	843.511	695.318	735.917	683.866	667.539
ENSMUSG00000005378.17	Wbscr22	chr5	135052957	135064959	12002	-0.125777	0.0884225	-1.42245	0.154894	0.469349	-0.09639	0.088684	-1.08689	0.277084	0.835288	1416.57	1448.09	1556.45	1504.64	1314.65	1390.56	1582.52	1467.06	1305.86	1407.25	1486.1	1346.58	1674.72	1497.86	1706.63
ENSMUSG00000005397.8	Nid1	chr13	13437551	13512269	74718	0.227029	0.16148	1.40593	0.159744	0.475964	-0.486467	0.162906	-2.98618	0.00282485	0.0996057	99.4753	43.4665	77.9221	49.6718	27.88	40.0883	56.2257	109.324	86.9389	101.175	100.463	54.5911	62.7097	69.3365	125.051
ENSMUSG00000005410.6	Mcm5	chr8	75109569	75128439	18870	0.0789187	0.153811	0.513089	0.607889	0.842559	-0.176327	0.154737	-1.13953	0.254484	0.817626	140.239	108.482	129.782	132.458	58.9769	126.529	115.966	144.59	132.183	115.483	168.702	118.76	116.197	168.117	116.055
ENSMUSG00000005413.8	Hmox1	chr8	75093621	75100589	6968	-0.296664	0.164783	-1.80033	0.0718079	NA	-0.388994	0.163763	-2.37534	0.0175327	NA	11.9359	9.75887	18.906	13.4528	6.43384	6.26379	12.8851	8.81644	14.1941	14.3076	10.4254	15.3238	21.2106	24.6952	14.3944
ENSMUSG00000005417.17	Mprip	chr11	59661305	59780860	119555	0.0408845	0.0820666	0.498187	0.618352	0.846622	-0.0637725	0.082091	-0.776852	0.437246	0.914858	28138.9	26038.4	27298.8	26957.3	24277	23459.2	29459.9	28112.1	26520.8	28248.3	29674.5	25284.3	27702	26142.7	30066.3
ENSMUSG00000005442.13	Cic	chr7	25267704	25294159	26455	-0.0831493	0.0946003	-0.878954	0.379426	0.697466	-0.0180202	0.0947192	-0.190248	0.849114	0.991148	2332.86	2450.76	2484.83	2481.52	2628.22	2103.38	2589.9	2352.23	2259.52	2386.3	2333.4	2086.91	2866.2	2374.54	2611.68
ENSMUSG00000005447.12	Pafah1b3	chr7	25295049	25297986	2937	-0.193632	0.16658	-1.1624	0.245073	0.579084	-0.100444	0.166642	-0.602757	0.54667	NA	22.5028	25.5776	29.1909	22.7663	33.2415	27.5607	18.7419	25.5677	23.9526	22.4833	18.0075	28.7321	43.3435	28.4944	16.1937
ENSMUSG00000005465.9	Il27ra	chr8	84030294	84042589	12295	-0.245565	0.166718	-1.47293	0.140769	0.44855	-0.344592	0.166597	-2.06842	0.0386008	NA	22.7987	19.3696	31.6559	20.6966	22.5184	22.5497	11.7137	23.8044	15.0812	28.6152	23.6941	30.6476	16.5996	37.9926	41.3838
ENSMUSG00000005469.10	Prkaca	chr8	83972993	83996443	23450	0.0154124	0.0594092	0.259427	0.795306	0.928839	0.0233213	0.0596183	0.391177	0.695666	0.977018	3500.82	3520.04	3462.71	3712.97	3611.53	3341.11	3414.54	3568.01	3598.21	3457.32	3379.73	3424.87	3666.67	3496.27	3263.03
ENSMUSG00000018168.8	Ikzf3	chr11	98464902	98546031	81129	0.481957	0.131394	3.66803	0.000244425	0.00856456	-0.212514	0.134798	-1.57654	0.114901	0.650361	210.831	115.551	139.749	127.284	96.5076	117.759	120.651	200.133	165.007	228.921	249.262	135.999	111.586	155.77	155.639
ENSMUSG00000005481.18	Ddx39	chr8	83715177	83726892	11715	0.0222476	0.100414	0.221558	0.824658	0.939248	-0.050134	0.101275	-0.49503	0.620579	0.965466	493.255	466.072	484.645	496.718	410.693	394.619	562.257	476.088	477.277	520.183	499.472	457.799	476.778	493.904	510.101
ENSMUSG00000005483.10	Dnajb1	chr8	83608193	83612653	4460	0.0901293	0.106917	0.842981	0.399239	0.712721	-0.147581	0.108722	-1.35741	0.174651	0.750604	318.762	264.629	297.096	279.404	221.967	281.871	275.272	343.841	304.286	293.305	333.613	248.054	336.604	307.74	295.984
ENSMUSG00000005493.15	Msh4	chr3	153857149	153906138	48989	0.0983327	0.1356	0.72517	0.468348	0.759478	0.180675	0.136075	1.32776	0.184258	0.758533	196.281	211.344	180.294	167.642	272.366	235.519	169.849	227.464	202.266	156.361	199.031	203.998	171.53	173.816	171.833
ENSMUSG00000005501.14	Usp40	chr1	87945119	88008551	63432	0.0843418	0.0558919	1.50902	0.131295	0.435092	0.0629115	0.0560061	1.1233	0.261311	0.822279	7783.22	7664.32	7328.49	8116.17	7367.82	7238.44	7934.86	7532.77	7938.06	7808.87	7853.19	7678.19	7071.44	7237.59	7326.74
ENSMUSG00000005505.12	Kbtbd4	chr2	90904740	90911626	6886	0.0813543	0.0873888	0.930947	0.351881	0.673897	-0.00250924	0.0881715	-0.0284586	0.977296	0.998383	732.704	687.67	689.15	712.998	687.348	645.171	705.165	633.021	809.064	754.214	734.518	639.769	755.283	654.422	707.124
ENSMUSG00000018585.9	Atox1	chr11	55446641	55461239	14598	0.371287	0.0982277	3.77986	0.000156916	0.00612441	0.135688	0.100177	1.35449	0.175581	0.750978	354.875	296.661	267.341	290.787	294.884	289.387	311.584	379.989	387.677	336.228	315.606	260.505	268.361	302.991	237.507
ENSMUSG00000005510.9	Ndufs3	chr2	90894634	90904827	10193	-0.0360041	0.0951611	-0.378349	0.705171	0.888468	-0.0302831	0.0953145	-0.317718	0.750699	0.984462	2340.76	2351.17	2405.71	2492.91	1889.4	2318.86	2703.52	2296.68	2224.93	2248.33	2593.09	2297.61	2362.68	2437.22	2525.31
ENSMUSG00000005514.14	Por	chr5	135670033	135735326	65293	-0.125263	0.0846322	-1.48009	0.13885	0.445803	-0.045578	0.0847397	-0.537858	0.590675	0.960416	2913.94	3092.43	3198.95	2947.2	3233	3029.17	3160.36	3221.53	2758.98	2728.66	2946.6	2832.99	3002.69	3330.05	3630.08
ENSMUSG00000005533.10	Igf1r	chr7	67952827	68233668	280841	0.102805	0.0670145	1.53406	0.125014	0.425178	0.03803	0.0670404	0.56727	0.570531	0.956175	31588.6	30142.5	29323.5	28281.9	29657.9	31059.6	31570.8	31726	32227.7	33894.7	28505.9	28780	30819.1	27875.2	29819.8
ENSMUSG00000005534.10	Insr	chr8	3122061	3279617	157556	-0.0420218	0.0484954	-0.866512	0.386209	0.703082	0.00500123	0.048547	0.103018	0.917948	0.994941	15377.7	15897.9	15842.1	16211.6	15756.5	15382.6	16241	15606.9	15180.6	15961.1	14762.4	15908	15178.5	15835.3	16446.5
ENSMUSG00000005540.10	Fcer2a	chr8	3681737	3694175	12438	0.170658	0.131606	1.29673	0.194723	0.522436	0.101612	0.132534	0.766685	0.443269	0.91839	215.13	203.015	185.884	211.105	190.871	217.98	192.105	179.855	289.205	196.218	195.24	151.323	177.985	211.809	202.421
ENSMUSG00000005547.14	Cyp2a5	chr7	26835305	26843548	8243	-0.41264	0.158452	-2.6042	0.00920887	NA	-0.452719	0.157352	-2.87712	0.00401325	NA	10.5103	9.29152	22.9583	10.3483	7.50615	8.76931	10.5423	16.7512	3.54853	12.2636	9.47766	28.7321	19.3662	10.448	33.287
ENSMUSG00000005553.14	Atp4a	chr7	30712209	30725534	13325	0.322399	0.159127	2.02605	0.0427594	0.242785	-0.164629	0.162141	-1.01534	0.309941	NA	39.7484	23.0918	28.4516	31.0449	21.4461	18.7914	21.0847	38.7924	42.5823	37.8129	39.8062	27.7744	24.8994	33.2435	27.8891
ENSMUSG00000005566.14	Trim28	chr7	12999114	13031035	31921	0.074463	0.0792348	0.939776	0.347333	0.669929	-0.0058707	0.0796397	-0.0737158	0.941237	0.996587	1652.42	1557.2	1564.01	1648.48	1406.87	1445.68	1727.77	1622.23	1689.1	1646.39	1651.96	1431.82	1695.93	1536.8	1591.48
ENSMUSG00000005575.16	Ube2m	chr7	13035120	13038275	3155	0.16126	0.112317	1.43576	0.15107	0.463428	0.103897	0.113057	0.918971	0.358111	0.88239	424.996	406.029	373.519	397.375	375.307	358.289	493.147	395.858	435.582	423.096	445.45	317.011	431.59	334.335	411.139
ENSMUSG00000005580.11	Adcy9	chr16	4287529	4420498	132969	-0.0752887	0.102673	-0.733284	0.463385	0.75682	-0.0359393	0.10268	-0.350012	0.72633	0.982057	38449.6	39640.6	40760.5	41876.5	36370.5	36267.4	44048.2	39000.4	36737	44408.7	33652.3	36396	42006.3	36998.1	47641.8
ENSMUSG00000005583.16	Mef2c	chr13	83504034	83667080	163046	-0.119227	0.126413	-0.943156	0.345601	0.668588	-0.00736992	0.126416	-0.0582988	0.953511	0.99764	27420	30120.1	30306.9	28361.6	33086	32661.9	26371	26891	32112.4	29297.8	21378.7	35435.3	32262.3	31678.2	21851.6
ENSMUSG00000005609.16	Ctr9	chr7	111028951	111056377	27426	0.0408554	0.0700734	0.583037	0.559869	0.817249	0.0240463	0.0704263	0.341439	0.732773	0.983753	1826.14	1804.46	1772.89	1772.66	1812.2	1811.49	1821.48	1880.55	1803.54	1657.64	1962.82	1617.62	1777.08	1809.4	1887.46
ENSMUSG00000005610.17	Eif4g2	chr7	111067750	111083030	15280	0.145295	0.0910464	1.59584	0.110525	0.400123	0.031993	0.0911374	0.351042	0.725557	0.9818	6488.74	5957.52	5815.19	5946.13	5312.21	5778.98	6792.77	6307.28	6946.24	6519.15	6182.27	5443.78	6831.67	5581.11	5404.19
ENSMUSG00000005611.15	Mrvi1	chr7	110868266	110982461	114195	-0.433116	0.148875	-2.90926	0.00362281	0.0555458	-0.0331539	0.148731	-0.222911	0.823605	0.989199	203.147	298.35	308.013	240.081	473.959	220.486	258.873	166.631	212.912	220.746	212.299	299.772	320.004	333.385	278.891
ENSMUSG00000005615.14	Pcyt1a	chr16	32430921	32475070	44149	0.0668872	0.0761421	0.878453	0.379698	0.697595	-0.0180122	0.0765623	-0.235263	0.814005	0.988604	1715.93	1613.01	1633.93	1596.74	1545.19	1673.69	1636.4	1827.65	1809.75	1646.39	1579.93	1474.92	1673.8	1597.59	1789.4
ENSMUSG00000005621.11	Zfp592	chr7	80993681	81045164	51483	-0.0134615	0.0518211	-0.259768	0.795043	0.928833	-0.0119326	0.0520644	-0.22919	0.818721	0.988667	3655.82	3659.43	3690.79	3585.69	3854.94	3663.07	3534.02	3572.42	3695.79	3686.25	3668.8	3713.15	3504.37	3718.52	3827.11
ENSMUSG00000005625.15	Psmd4	chr3	95032694	95042614	9920	-0.115616	0.058408	-1.97946	0.0477645	0.259377	0.0453528	0.0586917	0.772729	0.439683	0.916038	1068.41	1198.42	1160.32	1217.99	1194.55	1150.03	1231.11	1036.81	1094.72	1098.62	1043.49	1115.76	1157.36	1180.62	1187.54
ENSMUSG00000005628.12	Tmod4	chr3	95124476	95129209	4733	0.000753932	0.166643	0.00452423	0.99639	0.998705	-0.149234	0.16646	-0.896514	0.369978	NA	30.3393	24.1607	30.2966	34.1494	21.4461	18.7914	22.256	29.0943	27.5011	17.3735	47.3883	22.9857	34.1215	20.8959	43.1831
ENSMUSG00000005640.11	Insrr	chr3	87796951	87816101	19150	0.498192	0.163108	3.05437	0.00225535	0.0409566	-0.294727	0.164004	-1.79707	0.0723251	0.542257	148.265	58.5736	85.207	87.9605	53.6153	38.8355	53.883	157.814	117.989	153.295	163.963	69.9149	55.3321	78.8346	136.747
ENSMUSG00000005649.17	Cabp5	chr7	13398132	13408887	10755	-0.143362	0.13826	-1.0369	0.299783	NA	-0.300617	0.136687	-2.19931	0.0278558	NA	10.5238	5.4511	15.5866	8.27864	7.50615	2.50552	3.51411	2.64493	20.404	14.3076	4.73883	21.0702	22.1328	4.74907	14.3944
ENSMUSG00000005656.9	Snx6	chr12	54746349	54795703	49354	0.0105142	0.0655626	0.160368	0.872591	0.959183	0.0484098	0.0657521	0.736248	0.46158	0.928371	2982.57	3065.48	2959.7	2991.69	3116.12	3223.35	2930.77	3018.75	2838.82	3033.21	3039.48	3036.99	2736.17	2848.49	3217.14
ENSMUSG00000005667.8	Mthfd2	chr6	83305691	83325908	20217	0.233034	0.125046	1.86358	0.0623807	0.297863	0.0819406	0.125816	0.651275	0.514869	0.943368	401.337	353.675	330.489	431.524	291.667	330.728	360.782	354.421	385.902	348.492	516.532	330.42	310.782	369.478	311.278
ENSMUSG00000005672.12	Kit	chr5	75574916	75656722	81806	-0.0287323	0.113921	-0.252212	0.800877	0.930659	0.243365	0.113923	2.13622	0.0326611	0.388076	2294.59	2852.73	2348.13	3008.25	3518.24	2268.75	2615.67	2340.77	2515.91	2243.22	2078.45	2167.36	2666.09	2071.55	2487.53
ENSMUSG00000005674.9	Tomm40l	chr1	171216011	171222514	6503	0.086685	0.124431	0.696648	0.486023	0.772249	-0.0597957	0.125114	-0.477929	0.632701	0.968809	450.754	398.794	419.271	494.649	280.944	390.861	428.721	449.639	433.808	473.172	446.398	343.828	457.412	435.015	440.828
ENSMUSG00000005677.14	Nr1i3	chr1	171213970	171220701	6731	0.0903493	0.136428	0.662249	0.507812	0.785514	-0.0542105	0.13697	-0.395783	0.692265	0.977018	399.119	351.259	368.534	451.186	228.401	348.267	377.181	387.924	394.774	412.876	400.905	282.533	408.535	381.825	401.243
ENSMUSG00000005681.12	Apoa2	chr1	171225054	171226379	1325	0.0405792	0.093697	0.433089	0.66495	NA	-0.00400372	0.0918726	-0.0435791	0.96524	NA	2.51129	1.83844	1.85216	0	0	5.01103	2.34274	2.64493	2.6614	0	4.73883	1.91548	1.8444	0.949815	2.69895
ENSMUSG00000005682.9	Pan2	chr10	128303335	128321358	18023	0.113591	0.0770674	1.47392	0.140504	0.448477	0.055597	0.0773656	0.718627	0.472371	0.932458	2181.13	2089.35	2006.49	2296.29	2060.97	1801.47	2198.66	2140.63	2233.8	2125.7	2224.41	1930.8	1909.88	2063	2122.27
ENSMUSG00000005683.8	Cs	chr10	128337734	128362479	24745	0.0200988	0.0626198	0.320965	0.748237	0.908441	-0.0515881	0.0629106	-0.820022	0.412203	0.909477	3132.86	2975.1	3087.78	2840.61	3102.18	2831.23	3126.39	3031.98	3253.11	3205.92	3040.43	3017.83	3316.24	3052.7	2964.34
ENSMUSG00000005686.17	Ampd3	chr7	110768206	110812405	44199	0.146826	0.090126	1.62912	0.103288	0.387208	0.109757	0.0902803	1.21574	0.224085	0.795851	3042.27	2958.57	2723.77	2949.27	2884.5	2752.31	3248.21	3018.75	2888.5	2831.88	3429.96	2587.81	2429.08	2740.21	3137.97
ENSMUSG00000005687.14	Bcas2	chr3	103171655	103179166	7511	-0.0816666	0.0777453	-1.05044	0.293517	0.624606	0.0498687	0.0780192	0.639185	0.522703	0.946063	944.322	1040.26	1002.75	1060.7	972.582	982.163	1145.6	912.502	975.845	953.498	935.445	946.245	1108.49	1013.45	942.832
ENSMUSG00000005696.11	Sh2d1a	chrX	42502453	42529330	26877	0.239535	0.108538	2.20691	0.0273203	0.19108	0.0653783	0.110397	0.59221	0.55371	0.952174	257.206	224.462	212.727	206.966	197.304	222.991	270.586	246.86	243.074	268.778	270.113	198.252	227.784	191.863	233.009
ENSMUSG00000005698.15	Ctcf	chr8	105636568	105682922	46354	-0.0408093	0.0547624	-0.745206	0.456147	0.753738	-0.0717456	0.0549655	-1.30529	0.191796	0.76311	4635.73	4534.89	4772.63	4431.14	4484.39	4697.85	4526.17	4553.69	4573.17	4699.02	4717.03	5136.35	4525.24	4814.61	4614.3
ENSMUSG00000005699.16	Pard6a	chr8	105701148	105703496	2348	0.218809	0.149496	1.46365	0.143289	0.453086	0.197052	0.150486	1.30943	0.190387	0.762727	86.5591	84.812	70.0868	98.3088	78.2784	87.6931	74.9677	70.5316	106.456	85.8455	83.4034	50.7601	90.3758	80.7342	58.4772
ENSMUSG00000005705.10	Agrp	chr8	105566698	105637393	70695	-0.0615192	0.0652774	-0.942428	0.345974	0.6688	-0.0218954	0.0653414	-0.335093	0.737555	0.984095	8831.38	9086.73	9232.02	9877.45	8818.65	8862.01	8788.79	8862.29	8197.99	9057.72	9207.54	8549.73	9434.12	9613.07	9331.16
ENSMUSG00000019817.18	Plagl1	chr10	13060504	13131694	71190	0.293598	0.0735718	3.99064	6.58963e-05	0.0031538	0.479251	0.0738204	6.49212	8.46371e-11	1.04194e-07	698.861	800.584	563.672	725.416	844.977	796.755	835.187	687.683	715.028	711.291	681.443	548.784	599.431	543.294	563.18
ENSMUSG00000005718.7	Tfap4	chr16	4544661	4559720	15059	0.288388	0.124788	2.31103	0.0208314	0.16288	-0.00350045	0.126816	-0.0276027	0.977979	0.998383	212.154	166.159	167.085	163.503	172.641	134.045	194.447	194.843	221.783	193.152	238.837	179.097	153.085	198.511	137.646
ENSMUSG00000005732.14	Ranbp1	chr16	18239784	18248732	8948	0.0478237	0.0973657	0.491176	0.623302	0.848918	0.0649657	0.0982276	0.66138	0.508369	0.942082	376.666	381.163	362.986	409.793	362.44	330.728	421.693	371.172	383.241	413.898	338.352	336.166	373.492	393.223	349.064
ENSMUSG00000005763.15	Cd247	chr1	165788681	165877277	88596	0.0996377	0.0834994	1.19327	0.232762	0.566488	0.113628	0.083743	1.35686	0.174825	0.750604	1799.11	1817.73	1670.48	1788.19	1781.1	1642.37	2059.27	1726.26	1699.74	1739.39	2031.06	1608.04	1650.74	1634.63	1788.5
ENSMUSG00000005774.12	Rfx5	chr3	94954075	94961561	7486	0.156334	0.107252	1.45763	0.144943	0.455113	0.12847	0.10762	1.19374	0.232581	0.804875	866.384	847.014	766.249	856.839	1040.14	684.006	807.074	790.835	906.649	828.818	939.236	702.98	845.659	775.049	741.311
ENSMUSG00000005779.12	Psmb4	chr3	94884093	94886961	2868	0.122193	0.0878963	1.3902	0.164468	0.481876	0.00995717	0.0889172	0.111983	0.910837	0.994941	604.519	556.441	552.039	553.634	495.406	551.214	625.511	632.139	640.509	529.38	616.048	525.798	566.232	572.738	543.388
ENSMUSG00000005802.12	Slc30a4	chr2	122681233	122702663	21430	0.127632	0.0940002	1.35779	0.174532	0.495139	0.145612	0.0942094	1.54562	0.122197	0.665228	1675.87	1699.12	1521.04	1618.47	1647.06	1593.51	1937.45	1667.19	1797.33	1715.89	1523.06	1432.78	1803.83	1417.12	1430.44
ENSMUSG00000005803.14	Sqor	chr2	122765237	122809569	44332	0.010304	0.161517	0.0637951	0.949133	0.983242	0.0256998	0.161061	0.159565	0.873224	NA	23.154	23.8593	22.6573	12.418	25.7354	16.2859	40.9979	17.6329	16.8555	17.3735	40.7539	20.1125	22.1328	13.2974	35.0863
ENSMUSG00000005804.14	Bloc1s6	chr2	122738503	122749475	10972	-8.786e-05	0.0889837	-0.000987372	0.999212	0.999467	-0.093121	0.0898994	-1.03584	0.300279	0.851729	621.837	580.274	621.879	558.808	512.562	575.016	674.709	581.885	663.575	591.721	650.167	588.051	647.386	608.831	643.249
ENSMUSG00000005813.12	Metap1	chr3	138458956	138489515	30559	-0.122343	0.0657706	-1.86015	0.0628646	0.299232	0.0159985	0.0659073	0.242743	0.808204	0.988506	2300.54	2543.55	2513.38	2358.38	2549.94	2713.48	2552.41	2440.39	2273.72	2250.38	2237.67	2451.81	2718.65	2431.53	2451.54
ENSMUSG00000005823.8	Gpr108	chr17	57234914	57247641	12727	-0.00295815	0.0892761	-0.0331349	0.973567	0.990585	-0.0410655	0.0896906	-0.457858	0.647055	0.971403	1147.33	1114.17	1150.06	1195.23	1195.62	894.47	1171.37	1115.28	1225.13	1081.24	1167.65	1107.15	1153.67	1198.67	1140.75
ENSMUSG00000005836.8	Gata6	chr18	11052510	11085635	33125	-0.0534089	0.0686019	-0.778534	0.436254	NA	-0.0439114	0.0674458	-0.651063	0.515006	NA	0.747926	0.894456	1.64273	0	1.07231	2.50552	0	0	0	2.04394	0.947766	0	0.922202	4.74907	0.899649
ENSMUSG00000005846.11	Rsl1d1	chr16	11192970	11203331	10361	0.00936229	0.0894568	0.104657	0.916648	0.97313	0.00140143	0.089753	0.0156143	0.987542	0.998383	1433.45	1425.38	1423.18	1360.8	1254.6	1471.99	1614.15	1383.3	1396.35	1409.3	1544.86	1246.02	1557.6	1419.97	1469.13
ENSMUSG00000005864.7	Cnga2	chrX	71991849	72010218	18369	0.0398422	0.160617	0.248058	0.80409	0.931591	-0.197723	0.162228	-1.21879	0.222923	NA	38.8585	29.432	37.2191	34.1494	33.2415	17.5386	32.7983	30.8576	47.9051	37.8129	38.8584	41.1827	35.9659	29.4443	42.2835
ENSMUSG00000005871.14	Apc	chr18	34220924	34322189	101265	-0.127509	0.0710309	-1.79511	0.0726357	0.321246	-0.041659	0.0710428	-0.586393	0.557611	0.952677	33619.7	35787.7	36889.3	34327.4	37736.6	37952.3	33134.5	33811.9	34401.2	35477.7	30788.2	39752.8	36295.1	36906	34603.2
ENSMUSG00000005873.5	Reep5	chr18	34344889	34373415	28526	0.0918667	0.0837856	1.09645	0.272882	0.604564	0.0187337	0.0840183	0.222971	0.823558	0.989198	2576.73	2440.87	2406.86	2445.3	2275.43	2614.51	2428.25	2535.61	2701.32	2498.72	2571.29	2335.92	2726.95	2516.06	2048.5
ENSMUSG00000005881.13	Ergic3	chr2	156008045	156018279	10234	-0.0425007	0.0841041	-0.505335	0.613324	0.844632	-0.00313716	0.0843717	-0.0371826	0.970339	0.998383	1444.15	1486.41	1490.08	1641.24	1403.65	1376.78	1523.95	1414.16	1397.23	1509.45	1455.77	1300.61	1581.58	1438.97	1639.16
ENSMUSG00000005882.18	Uqcc1	chr2	155846894	155930310	83416	0.0154335	0.069057	0.223489	0.823155	0.938748	0.0199996	0.0692001	0.289012	0.772573	0.984875	4244.1	4257.78	4196.44	4011	4616.28	4225.56	4178.28	4008.84	4342.51	4534.48	4090.56	4441.99	4033.71	3952.18	4357.9
ENSMUSG00000005883.15	Spo11	chr2	172977700	172993576	15876	0.163119	0.160973	1.01333	0.310904	NA	0.355676	0.160689	2.21345	0.0268667	NA	11.058	15.7367	7.94656	10.3483	11.7954	15.0331	25.7701	13.2247	11.5327	7.15379	12.321	10.5351	6.45541	7.59852	7.19719
ENSMUSG00000005886.14	Ncoa2	chr1	13139105	13374083	234978	0.19361	0.0651637	2.97113	0.00296703	0.0487633	0.239677	0.0651775	3.6773	0.000235719	0.0191143	40094.6	41450.3	34864.4	40127.6	40569.6	40306.3	44797.9	41694.7	39160.7	42550.7	36972.3	34250.6	33715.7	34386.1	37105.1
ENSMUSG00000005892.4	Trh	chr6	92242061	92244650	2589	0.0517708	0.152048	0.34049	0.733488	NA	0.0834762	0.151197	0.552104	0.580877	NA	12.5004	13.3787	11.0035	14.4876	13.94	7.51655	17.5705	12.343	11.5327	20.4394	5.68659	12.4506	19.3662	9.49815	2.69895
ENSMUSG00000005893.14	Nr2c2	chr6	92091390	92174294	82904	-0.00436476	0.0683059	-0.0639001	0.94905	0.983242	-0.0759055	0.0683618	-1.11035	0.266849	0.825199	14535.1	13800.9	14581.5	13416.6	13715.9	14684.8	13386.4	14205.9	15175.3	14425.1	14334	16347.6	13402.4	14537.9	14038.1
ENSMUSG00000005897.14	Nr2c1	chr10	94148023	94197211	49188	0.132564	0.0521528	2.54184	0.0110269	0.111821	0.0115718	0.0525564	0.220178	0.825732	0.989694	3299.49	3027.1	3002.8	3111.73	2956.35	2913.92	3126.39	3229.46	3269.97	3206.94	3491.57	3042.73	3025.74	2990.97	2951.75
ENSMUSG00000005899.12	Smpd4	chr16	17619354	17644828	25474	-0.0452187	0.0809087	-0.558886	0.57624	0.825892	-0.0777775	0.0810352	-0.9598	0.337156	0.871853	4364.69	4259.73	4512.92	4969.25	4041.52	3815.9	4212.25	4210.73	4467.6	4560.03	4220.4	4226.5	4761.33	4614.2	4449.66
ENSMUSG00000005907.14	Pex1	chr5	3596066	3637232	41166	-0.0504066	0.0546665	-0.922074	0.35649	0.677549	-0.0269171	0.0548737	-0.490529	0.62376	0.966289	3672.03	3733.94	3806.5	3788.51	3782.02	3817.16	3548.08	3611.22	3733.05	3649.45	3694.39	4067.51	3654.69	3658.69	3845.1
ENSMUSG00000005917.15	Otx1	chr11	21994764	22002897	8133	-0.216682	0.166722	-1.29966	0.193717	0.521401	-0.0167428	0.166718	-0.100426	0.920006	0.994941	47.1779	62.8776	64.1065	52.7763	56.8322	92.7041	49.1975	32.6208	68.3092	60.2962	27.4852	81.4077	84.8426	55.0892	35.0863
ENSMUSG00000005936.18	Kctd20	chr17	28951950	28969549	17599	-0.00636736	0.0710179	-0.0896585	0.928559	0.977269	0.0200683	0.0712664	0.281595	0.778254	0.984875	2137.69	2180.08	2148.12	2189.7	1993.42	2207.36	2329.85	2190.89	2170.81	1943.79	2245.26	2082.12	2112.76	2301.4	2096.18
ENSMUSG00000005947.11	Itgae	chr11	73090583	73147446	56863	-0.136127	0.157537	-0.864096	0.387535	0.70362	-0.164933	0.158642	-1.03966	0.2985	0.851562	43.2809	41.7045	49.7047	50.7067	37.5307	37.5828	40.9979	28.2126	47.018	42.9227	54.9704	40.225	48.8767	50.3402	59.3768
ENSMUSG00000005949.9	Ctns	chr11	73183596	73199042	15446	0.200726	0.0842736	2.38184	0.0172264	0.145888	0.148593	0.0845962	1.75649	0.0790045	0.563613	1717.51	1651.96	1479.65	1769.56	1673.87	1487.02	1677.4	1700.69	1859.43	1570.77	1739.15	1530.47	1550.22	1557.7	1280.2
ENSMUSG00000005950.14	P2rx5	chr11	73160421	73172685	12264	-0.01529	0.15539	-0.0983974	0.921617	0.975271	0.104977	0.156019	0.672847	0.501044	0.940876	45.506	51.3316	46.2148	46.5673	56.8322	36.33	65.5967	43.2006	48.7923	52.1205	37.9106	48.8446	53.4877	46.5409	35.9859
ENSMUSG00000005951.13	Shpk	chr11	73199460	73224511	25051	0.267882	0.101062	2.65068	0.00803296	0.0926744	0.133777	0.101911	1.31269	0.189287	0.762727	599.355	540.436	487.655	600.201	501.839	534.928	524.774	558.081	641.396	547.776	650.167	565.065	482.312	493.904	409.34
ENSMUSG00000005952.15	Trpv1	chr11	73234292	73261242	26950	-0.170701	0.166713	-1.02392	0.305874	NA	-0.256056	0.166524	-1.53766	0.124133	NA	17.7475	15.4355	22.3658	21.7314	8.57845	15.0331	16.3992	15.8696	19.5169	20.4394	15.1642	28.7321	18.444	17.0967	25.1902
ENSMUSG00000005958.14	Ephb3	chr16	21204755	21223305	18550	-0.298333	0.165667	-1.80081	0.0717335	0.31914	0.0612262	0.165652	0.369608	0.711675	0.97885	167.915	264.498	245.467	305.275	239.124	350.772	162.82	155.169	232.429	192.13	91.9333	256.674	286.805	311.539	126.85
ENSMUSG00000005968.14	Tuft1	chr3	94612757	94658872	46115	0.516188	0.144171	3.58039	0.000343084	0.0109707	0.258091	0.145215	1.77729	0.0755199	0.552452	213.476	168.614	132.581	165.573	216.606	171.628	120.651	190.435	245.736	218.702	199.031	138.872	168.763	128.225	94.4631
ENSMUSG00000005973.6	Rcn1	chr2	105386291	105399319	13028	-0.00854735	0.113409	-0.0753677	0.939922	0.980864	0.0861906	0.113631	0.758513	0.448144	0.922018	710.26	766.102	715.063	832.003	680.915	730.358	821.13	677.103	609.46	628.512	925.967	666.586	699.951	755.103	738.612
ENSMUSG00000005980.15	Dnase1	chr16	4036942	4040024	3082	0.0990331	0.0928433	1.06667	0.286121	0.61835	-0.103378	0.0946115	-1.09266	0.274544	0.833085	399.864	342.877	370.86	318.728	372.09	344.509	336.183	394.977	406.306	406.744	391.427	311.265	367.959	407.47	396.745
ENSMUSG00000005981.11	Trap1	chr16	4039971	4077827	37856	-0.056849	0.065488	-0.868083	0.385349	0.702547	-0.0428814	0.0656641	-0.653041	0.51373	0.943101	3565.49	3601.77	3714.76	3516.35	3516.09	3438.82	3935.8	3745.23	3352.47	3525.8	3638.47	3598.22	3872.33	3537.11	3851.4
ENSMUSG00000005982.13	Naa60	chr16	3872375	3904780	32405	0.123936	0.0663749	1.86721	0.0618726	0.297474	0.00984801	0.0666076	0.147851	0.88246	0.992835	4133.43	3807.09	3779.43	3635.36	3590.08	3752.01	4250.9	4207.21	4316.78	3918.23	4091.5	3646.11	3877.86	3727.07	3866.69
ENSMUSG00000005983.15	1700037C18Rik	chr16	3895179	3908689	13510	0.173305	0.0641771	2.70042	0.00692513	0.0842288	0.104881	0.0646365	1.62262	0.10467	0.626464	1897.23	1806.38	1674.35	1750.93	1723.2	1741.33	2010.07	1875.26	1947.25	1879.4	1887	1616.66	1726.36	1644.13	1710.23
ENSMUSG00000005986.15	Ankrd13d	chr19	4270180	4283137	12957	-0.174459	0.0897912	-1.94295	0.0520228	0.271277	-0.177227	0.089953	-1.97021	0.0488138	0.458634	2549.67	2543.69	2906.99	2658.48	2797.65	2655.85	2062.78	2521.5	2491.95	2806.33	2378.89	2942.17	2852.37	3050.8	2782.61
ENSMUSG00000005994.14	Tyrp1	chr4	80834123	80851719	17596	-0.141883	0.100477	-1.4121	0.157921	NA	-0.0869815	0.0994886	-0.874286	0.381962	NA	1.90499	3.09958	5.20556	1.03483	6.43384	3.75828	1.17137	2.64493	0.887132	4.08788	0	3.83095	1.8444	14.2472	0.899649
ENSMUSG00000006005.17	Tpr	chr1	150392838	150449935	57097	-0.0123083	0.0756078	-0.162792	0.870682	0.958799	-0.000778169	0.0756764	-0.0102829	0.991796	0.998458	7551.64	7616.37	7620.22	7311.07	6983.93	7550.38	8620.11	7571.56	7870.63	7558.49	7205.86	7384.16	8284.14	7713.44	7099.13
ENSMUSG00000006007.14	Pdc	chr1	150319417	150333906	14489	0.0228819	0.158446	0.144414	0.885173	NA	0.181364	0.157934	1.14836	0.250822	NA	8.81111	12.0938	8.42471	11.3831	15.0123	13.7803	8.19959	7.05316	13.307	9.19773	5.68659	11.4929	4.61101	9.49815	8.09684
ENSMUSG00000006010.14	BC003331	chr1	150361305	150393080	31775	-0.0421627	0.0786854	-0.535838	0.59207	0.833445	0.00156558	0.0788938	0.0198441	0.984168	0.998383	2024.8	2091.19	2088.61	2149.34	1875.46	2001.91	2338.05	2061.28	1904.67	1984.67	2148.58	2073.5	2264.01	1975.61	2041.3
ENSMUSG00000006014.16	Prg4	chr1	150449412	150466165	16753	0.149876	0.101863	1.47135	0.141198	0.44937	0.0473446	0.103674	0.456666	0.647911	0.971403	247.421	228.67	220.525	234.906	230.546	225.497	223.732	247.742	282.995	238.119	220.829	231.773	238.85	193.762	217.715
ENSMUSG00000006019.15	Dhx34	chr7	16197147	16222037	24890	0.139243	0.0849436	1.63924	0.101163	0.383579	0.0432353	0.0861217	0.502026	0.615649	0.963925	527.934	491.65	476.139	526.728	434.284	477.301	528.288	544.856	518.972	491.568	556.338	465.461	497.067	495.803	446.226
ENSMUSG00000006021.5	Kptn	chr7	16119895	16127516	7621	0.0957252	0.0920338	1.04011	0.298289	0.628378	-0.115183	0.0927949	-1.24127	0.214507	0.785694	976.544	832.445	908.585	882.71	744.181	752.908	949.981	959.229	977.619	872.762	1096.56	875.373	932.346	943.166	883.455
ENSMUSG00000006024.13	Napa	chr7	16098458	16117975	19517	-0.0827619	0.0739144	-1.1197	0.262842	0.595717	0.0705028	0.0739818	0.952975	0.340603	0.873905	3518.72	3935.82	3738.21	4072.06	3936.44	3735.73	3999.06	3597.11	3528.12	3376.59	3573.08	3217.04	4101.03	3804.96	3829.8
ENSMUSG00000006050.11	Sra1	chr18	36666681	36679366	12685	0.0746358	0.078318	0.952984	0.340598	0.663937	0.0956301	0.0785107	1.21805	0.223205	0.795129	2446.21	2484.33	2315.4	2696.77	2221.82	2335.14	2683.61	2512.69	2478.65	2358.71	2434.81	2219.08	2262.16	2224.47	2555.9
ENSMUSG00000006056.13	Calcoco2	chr11	96099326	96111964	12638	-0.0166008	0.126211	-0.131532	0.895355	NA	-0.0208876	0.124005	-0.168441	0.866237	NA	3.47263	3.45293	3.70924	2.06966	3.21692	5.01103	3.51411	2.64493	6.20992	4.08788	0.947766	2.87321	2.76661	3.79926	5.39789
ENSMUSG00000006057.15	Atp5g1	chr11	96068852	96075670	6818	0.0984027	0.10388	0.947269	0.343502	0.666418	-0.0150532	0.104264	-0.144375	0.885204	0.993123	1179.3	1079.96	1092.34	1062.77	960.787	1106.19	1190.11	1093.24	1274.81	1143.58	1205.56	856.218	1255.12	1156.87	1101.17
ENSMUSG00000006058.10	Snf8	chr11	96034885	96047430	12545	0.113445	0.0839532	1.35129	0.176602	0.498481	-0.0208051	0.08511	-0.24445	0.806883	0.988506	613.195	555.322	563.737	580.54	471.815	557.478	611.455	605.69	650.268	584.567	612.257	543.995	554.243	574.638	582.073
ENSMUSG00000006095.12	Tbcb	chr7	30224131	30232272	8141	-0.0638362	0.115026	-0.55497	0.578915	0.827334	-0.0740744	0.115822	-0.639555	0.522462	0.946063	310.222	307.332	326.116	317.693	295.957	299.409	316.27	278.6	290.979	343.382	327.927	240.392	360.581	340.034	363.458
ENSMUSG00000006127.9	Inpp5k	chr11	75630988	75648871	17883	-0.0168295	0.0577022	-0.291661	0.770546	0.917877	-0.0490917	0.0579431	-0.84724	0.396861	0.899531	3676.09	3591.14	3719.95	3734.7	3551.48	3458.87	3619.53	3488.67	3641.68	3843.63	3730.41	3533.1	3959.01	3709.03	3678.66
ENSMUSG00000006134.3	Crkl	chr16	17451987	17486255	34268	0.0509699	0.0479251	1.06353	0.287541	0.619455	0.114594	0.0481801	2.37844	0.0173859	0.279975	2897.93	3032.06	2795.41	2968.93	3098.97	3078.03	2982.31	2952.63	2877.86	2816.55	2944.71	2695.07	2867.13	2832.35	2787.11
ENSMUSG00000006143.12	Upk3bl	chr5	136054492	136064326	9834	0.0166828	0.0915966	0.182133	0.855478	NA	-0.0437641	0.0894659	-0.489171	0.624721	NA	2.10822	1.23241	1.8482	0	0	3.75828	1.17137	2.64493	1.77426	3.06591	0.947766	0	1.8444	2.84944	2.69895
ENSMUSG00000006154.13	Eps8l1	chr7	4460674	4480487	19813	-0.168382	0.0945552	-1.78078	0.0749479	0.327315	-0.241236	0.0950359	-2.53837	0.011137	0.225564	996.733	942.289	1132.49	1055.53	947.919	944.58	821.13	921.318	999.798	1013.79	1052.02	948.161	1228.37	1208.16	1145.25
ENSMUSG00000006169.19	Clint1	chr11	45852051	45910625	58574	-0.0448699	0.059771	-0.750697	0.452835	0.752487	-0.0253315	0.0598743	-0.423078	0.672238	0.974256	6709.57	6805.22	6928.87	6333.16	6750.17	7017.95	7119.58	6973.81	6469.85	6576.38	6818.23	6779.83	6702.56	6808.27	7424.8
ENSMUSG00000006179.9	Prss16	chr13	22002173	22009742	7569	0.110761	0.142044	0.779763	0.43553	NA	0.222853	0.141142	1.57893	0.114352	NA	6.70088	9.23414	4.68024	8.27864	6.43384	17.5386	4.68548	3.52658	11.5327	5.10985	6.63436	7.6619	4.61101	2.84944	3.59859
ENSMUSG00000006191.17	Cdkal1	chr13	29191746	29855674	663928	-0.0280956	0.060309	-0.46586	0.641316	0.858357	-0.0173105	0.0603454	-0.286857	0.774222	0.984875	19528.6	19680.5	19926.4	18892.9	20868.2	20247.1	18713.8	19683.6	19862.9	19664.7	18903.2	21592.2	19004.7	19268.9	19840
ENSMUSG00000006204.6	5430419D17Rik	chr7	131174402	131306451	132049	-0.112674	0.165392	-0.681256	0.49571	NA	-0.283368	0.166063	-1.70639	0.0879354	NA	22.8147	18.202	26.1253	16.5573	18.2292	26.3079	11.7137	22.9228	25.7268	25.5492	17.0598	26.8167	24.8994	28.4944	24.2905
ENSMUSG00000006205.13	Htra1	chr7	130936111	130985660	49549	0.00492884	0.166255	0.0296462	0.976349	0.991842	0.196109	0.166253	1.17958	0.238168	0.808122	647.699	859.374	642.703	767.844	999.39	611.346	1058.92	633.902	629.864	641.797	685.235	409.912	568.999	382.775	1209.13
ENSMUSG00000006215.12	Zbtb17	chr4	141444654	141467930	23276	-0.095161	0.094653	-1.00537	0.31472	0.642517	-0.0138223	0.0947844	-0.145829	0.884056	0.993038	1934.3	2057.27	2079.24	2185.56	1909.78	1712.52	2421.22	1905.23	1857.65	1975.47	1998.84	2021.78	1953.22	2048.75	2293.2
ENSMUSG00000006216.10	Clcnkb	chr4	141404353	141416014	11661	0.0662398	0.103433	0.640412	0.521905	NA	-0.0151265	0.101654	-0.148803	0.881709	NA	4.1911	2.44014	2.83198	5.17415	1.07231	0	3.51411	5.28987	1.77426	3.06591	6.63436	0.957738	0.922202	8.54833	0.899649
ENSMUSG00000006218.4	Fam131c	chr4	141368220	141384175	15955	-0.209225	0.166692	-1.25516	0.209421	0.539807	0.00385155	0.166682	0.0231071	0.981565	0.998383	35.0256	47.4911	47.2253	34.1494	80.423	42.5938	32.7983	18.5145	47.018	48.0326	26.5374	37.3518	57.1765	49.3904	44.9824
ENSMUSG00000006219.12	Fblim1	chr4	141576062	141606096	30034	-0.0198637	0.138642	-0.143273	0.886074	0.964047	0.0256601	0.139238	0.184289	0.853786	0.99135	168.933	175.382	171.718	191.444	206.955	140.309	162.82	185.145	114.44	194.174	181.971	183.886	167.841	145.322	189.826
ENSMUSG00000006221.7	Hspb7	chr4	141420779	141425311	4532	-0.105171	0.0838034	-1.25498	0.209488	NA	-0.089541	0.0823406	-1.08745	0.276839	NA	0.884388	1.09868	2.5692	2.06966	1.07231	1.25276	0	1.76329	1.77426	0	0	4.78869	3.68881	0	1.7993
ENSMUSG00000006235.6	Epor	chr9	21958897	21963506	4609	0.40942	0.136601	2.9972	0.00272469	0.0465015	-0.210627	0.138754	-1.51798	0.129018	0.676435	258.062	149.184	180.522	168.677	110.448	182.903	134.708	232.754	260.817	213.592	325.084	170.477	193.662	202.31	155.639
ENSMUSG00000006241.16	Ccdc159	chr9	21927471	21935872	8401	-0.0470058	0.0969623	-0.484784	0.62783	0.851011	0.0852328	0.0972291	0.876618	0.380694	0.892505	658.132	727.436	682.05	822.69	714.156	613.852	759.048	612.743	662.688	664.28	692.817	585.178	713.784	743.705	685.532
ENSMUSG00000006262.15	Mob1b	chr5	88720855	88764220	43365	-0.0535087	0.0722361	-0.740748	0.458846	0.75416	-0.146376	0.0724688	-2.01985	0.0433994	0.434834	3436.42	3212.15	3573.51	3024.81	3240.51	3519	3064.3	3425.19	3516.59	3248.84	3555.07	3965.99	3452.72	3393.69	3481.64
ENSMUSG00000006269.7	Atp6v1b1	chr6	83742990	83758855	15865	-0.304739	0.129712	-2.34934	0.0188065	0.154489	-0.108198	0.129922	-0.832797	0.404959	0.905128	206.039	243.595	266.82	213.175	300.246	261.827	199.133	217.766	175.652	241.185	189.553	270.082	268.361	218.457	310.379
ENSMUSG00000006270.7	Vax1	chr19	59166187	59170056	3869	0.0304336	0.159127	0.191253	0.848328	NA	0.044357	0.158275	0.280252	0.779284	NA	13.2937	13.5992	12.4613	22.7663	9.65076	13.7803	8.19959	14.1063	8.87132	11.2417	18.9553	6.70417	16.5996	8.54833	17.993
ENSMUSG00000006273.14	Atp6v1b2	chr8	69088646	69113711	25065	-0.0534545	0.0505465	-1.05753	0.29027	0.622115	0.0291194	0.0506422	0.575002	0.56529	0.953943	6584.78	6982.7	6839.64	7085.48	6587.18	6908.96	7349.17	6605.28	6529.29	6464.98	6739.56	6913.91	7042.86	6791.17	6610.62
ENSMUSG00000006276.10	Eps15l1	chr8	72340999	72421460	80461	-0.104456	0.0639346	-1.63379	0.102303	0.385231	-0.0196452	0.0639593	-0.307152	0.758728	0.984462	18748.7	19930.2	20214.6	20168.8	20490.7	19322.5	19738.7	19293.9	18334.4	18364.8	19001.8	20191	18447.7	19740	22479.5
ENSMUSG00000006281.7	Tep1	chr14	50824062	50870560	46498	0.0154293	0.128492	0.12008	0.90442	0.96879	-0.16397	0.130045	-1.26087	0.207356	0.778241	189.667	162.524	187.466	199.722	162.991	150.331	137.05	188.672	219.122	159.427	191.449	170.477	217.64	206.11	155.639
ENSMUSG00000006288.7	Ttc5	chr14	50765415	50785518	20103	0.0412902	0.0682806	0.604714	0.545369	0.808622	-0.0753714	0.0686611	-1.09773	0.272322	0.830676	2441.66	2243.92	2369.89	2268.35	2063.12	2159.76	2484.47	2383.08	2515.02	2308.63	2559.91	2323.47	2428.16	2406.83	2321.09
ENSMUSG00000006289.14	Osgep	chr14	50906478	50924893	18415	0.159468	0.0763359	2.08903	0.0367053	0.224204	0.0772669	0.0768697	1.00517	0.314816	0.857341	1334.2	1256.31	1186.85	1306.99	1103.4	1231.46	1383.39	1294.25	1341.34	1306.08	1395.11	1183.76	1108.49	1226.21	1228.92
ENSMUSG00000006299.13	Aamp	chr1	74279840	74284738	4898	0.0893309	0.119229	0.749236	0.453715	0.752886	-0.00265038	0.120197	-0.0220503	0.982408	0.998383	307.445	285.299	285.736	321.832	218.751	301.915	298.699	274.191	327.352	298.415	329.822	227.942	302.482	303.941	308.58
ENSMUSG00000006301.17	Tmbim1	chr1	74288247	74305622	17375	-0.0145979	0.0929156	-0.15711	0.875159	0.959466	0.0621179	0.0930689	0.66744	0.504491	0.941196	1763.76	1868.68	1783.09	1872.01	2132.82	1681.2	1788.68	1909.64	1595.06	1827.28	1723.04	1651.14	1776.16	1658.38	2046.7
ENSMUSG00000006304.14	Arpc2	chr1	74236084	74268209	32125	-0.132729	0.0892628	-1.48694	0.13703	0.443055	-0.0184472	0.0892981	-0.20658	0.836338	0.991148	6603.51	7196.21	7296.17	7392.82	6325.54	7126.94	7939.54	7095.47	6285.33	6377.09	6656.16	6232	7718.83	7173	8060.85
ENSMUSG00000006307.16	Kmt2b	chr7	30568858	30588726	19868	-0.0836162	0.0686429	-1.21813	0.223173	0.55675	0.047678	0.0687348	0.693651	0.487901	0.935631	3401.58	3740.99	3614.48	3998.58	3702.67	3338.6	3924.09	3464.86	3544.09	3288.7	3308.65	3406.67	3785.64	3595.05	3670.57
ENSMUSG00000006310.10	Zbtb32	chr7	30589681	30598909	9228	0.014206	0.131102	0.108359	0.913711	0.971828	0.0476583	0.132504	0.359675	0.71909	0.980561	95.3307	97.9838	93.9975	93.1347	108.303	101.473	89.0241	104.916	76.2933	106.285	93.8288	79.4923	106.053	96.8811	93.5635
ENSMUSG00000006313.5	Upk1a	chr7	30603092	30612847	9755	-0.147205	0.14133	-1.04157	0.297612	0.627773	0.0634746	0.141568	0.448369	0.653887	0.971647	101.479	122.681	115.761	126.249	135.111	122.77	106.595	84.6379	114.44	120.592	86.2467	90.0274	107.898	113.978	151.141
ENSMUSG00000006315.9	Tmem147	chr7	30727701	30729540	1839	-0.100362	0.131944	-0.760642	0.446871	0.748762	-0.0690272	0.13237	-0.521471	0.602039	0.961843	313.246	321.445	341.089	381.852	245.558	289.387	368.981	261.848	292.754	363.821	334.561	278.702	362.425	321.987	401.243
ENSMUSG00000006333.14	Rps9	chr7	3703993	3706897	2904	0.0475285	0.120461	0.394555	0.693171	0.883258	-0.052167	0.121966	-0.427717	0.668857	0.973369	193.985	179.006	186.641	175.921	145.834	172.881	221.389	210.713	183.636	177.823	203.77	164.731	217.64	184.264	179.93
ENSMUSG00000006335.16	Tfpt	chr7	3620324	3629929	9605	0.162997	0.0910834	1.78954	0.0735284	0.32351	-0.0321867	0.0921972	-0.349107	0.727009	0.98212	652.118	562.481	576.842	583.644	586.552	518.642	561.086	613.624	733.658	635.665	625.525	556.446	663.985	565.14	521.796
ENSMUSG00000006342.15	Susd2	chr10	75636706	75644008	7302	0.0754725	0.148656	0.507699	0.611665	0.843958	0.167347	0.148948	1.12352	0.261216	0.822279	181.411	197.572	168.634	246.29	201.594	167.87	174.534	150.761	177.426	213.592	183.867	149.407	237.006	174.766	113.356
ENSMUSG00000006344.17	Ggt5	chr10	75589340	75617200	27860	-0.0367798	0.150048	-0.245119	0.806364	NA	-0.0152172	0.149241	-0.101964	0.918785	NA	12.8298	13.6318	14.0747	12.418	8.57845	11.2748	22.256	15.8696	11.5327	3.06591	20.8508	7.6619	8.29982	14.2472	26.0898
ENSMUSG00000006345.10	Ggt1	chr10	75561604	75586200	24596	-0.147192	0.159316	-0.923902	0.355537	NA	-0.15336	0.158313	-0.968713	0.332688	NA	11.4014	11.129	15.1246	12.418	12.8677	7.51655	11.7137	4.40822	20.404	12.2636	8.52989	11.4929	11.0664	19.9461	17.993
ENSMUSG00000006356.10	Crip2	chr12	113140236	113145506	5270	0.168296	0.133089	1.26454	0.206037	0.535918	-0.152481	0.134284	-1.13551	0.25616	0.818238	305.108	231.21	263.835	238.011	164.063	275.607	247.159	289.179	302.512	292.283	336.457	237.519	341.215	217.508	259.099
ENSMUSG00000006360.11	Crip1	chr12	113146316	113153879	7563	0.0409346	0.156135	0.262174	0.793187	NA	-0.0171018	0.155046	-0.110302	0.91217	NA	14.3963	12.7261	13.1918	20.6966	3.21692	18.7914	8.19959	10.5797	18.6298	12.2636	16.112	6.70417	17.5218	12.3476	16.1937
ENSMUSG00000006362.16	Cbfa2t3	chr8	122625141	122699109	73968	-0.295546	0.135126	-2.18719	0.0287289	0.196726	-0.325261	0.135245	-2.40498	0.0161736	0.272468	1292.75	1258.99	1672.56	1435.31	1262.1	1431.9	906.64	1385.94	951.005	1556.46	1277.59	1438.52	1928.32	1841.69	1481.72
ENSMUSG00000006369.14	Fbln1	chr15	85205949	85286535	80586	0.0560735	0.161979	0.346178	0.729209	0.899652	-0.0886922	0.16283	-0.544691	0.585966	0.959176	51.0781	43.2728	47.8742	42.428	32.1692	37.5828	60.9112	51.1354	37.2595	56.2083	59.7092	41.1827	33.1993	54.1394	62.9754
ENSMUSG00000006373.10	Pgrmc1	chrX	36598206	36606079	7873	0.185557	0.107884	1.71996	0.0854389	0.351245	-0.0137872	0.10853	-0.127036	0.898912	0.993536	812.189	694.095	701.813	729.555	614.432	610.093	822.301	718.54	888.906	858.455	782.854	624.445	814.304	700.963	667.539
ENSMUSG00000006378.14	Gcat	chr15	79030874	79042531	11657	0.0320427	0.166496	0.192454	0.847387	0.947783	0.0140746	0.166635	0.0844637	0.932688	NA	25.0707	24.3572	23.9562	26.9056	26.8077	23.8024	19.9133	19.3962	31.0496	33.725	16.112	15.3238	27.6661	29.4443	23.3909
ENSMUSG00000019312.10	Grb7	chr11	98446394	98455373	8979	0.487614	0.13485	3.61598	0.000299216	0.00984902	-0.154752	0.136261	-1.1357	0.256081	0.818238	439.381	250.513	287.881	299.066	210.172	229.255	263.558	446.994	394.774	342.36	573.398	252.843	248.072	326.736	323.874
ENSMUSG00000006389.13	Mpl	chr4	118442415	118457513	15098	-0.0155069	0.132717	-0.116841	0.906986	NA	0.0600658	0.132191	0.454386	0.649551	NA	11.13	14.4882	11.8283	19.6618	17.1569	18.7914	2.34274	11.4614	16.8555	14.3076	1.89553	20.1125	6.45541	18.0465	2.69895
ENSMUSG00000006390.15	Elovl1	chr4	118428093	118432953	4860	-0.223993	0.0975687	-2.29575	0.0216901	0.166659	-0.202798	0.0984375	-2.06017	0.0393825	0.418105	362.522	368.118	429.665	378.748	331.343	375.828	386.552	335.907	314.932	395.502	403.748	400.334	423.291	423.617	471.416
ENSMUSG00000006392.16	Med8	chr4	118409337	118415782	6445	0.0149152	0.0837044	0.178189	0.858575	0.9528	-0.0413124	0.084399	-0.48949	0.624495	0.966289	810.62	776.645	801.634	889.954	737.747	676.49	802.388	824.338	808.177	805.312	804.653	740.332	838.281	809.242	818.68
ENSMUSG00000006395.16	Hyi	chr4	118359990	118362744	2754	-0.0773982	0.103647	-0.746746	0.455217	0.753731	-0.206051	0.104556	-1.97072	0.0487554	0.458482	516.355	466.23	547.872	515.345	483.61	419.674	446.292	523.697	448.002	574.347	519.376	451.095	580.987	557.541	601.865
ENSMUSG00000006398.15	Cdc20	chr4	118432901	118437352	4451	0.0349139	0.165121	0.211444	0.832541	NA	-0.14664	0.164343	-0.892279	0.372244	NA	21.0633	15.4076	19.8573	17.5921	13.94	12.5276	17.5705	16.7512	18.6298	20.4394	28.433	19.1548	20.2884	7.59852	32.3874
ENSMUSG00000006403.13	Adamts4	chr1	171250421	171260637	10216	0.186381	0.164234	1.13485	0.256438	0.589705	-0.318007	0.164912	-1.92834	0.0538125	0.480933	91.0103	49.4212	73.5253	36.219	40.7476	55.1214	65.5967	131.365	54.115	70.5159	108.045	60.3375	87.6092	58.8885	87.2659
ENSMUSG00000006411.12	Nectin4	chr1	171370099	171388598	18499	-0.0635674	0.164449	-0.386548	0.699091	0.885537	-0.112659	0.165007	-0.682751	0.494764	NA	32.7537	30.6328	35.1342	35.1842	25.7354	28.8134	32.7983	18.5145	33.711	40.8788	37.9106	42.1405	35.9659	23.7454	38.6849
ENSMUSG00000006412.10	Pfdn2	chr1	171345670	171359254	13584	0.0323025	0.0721975	0.447419	0.654573	0.865665	-0.000846135	0.0727898	-0.0116244	0.990725	0.998383	1102.73	1077.19	1077.55	1075.19	983.305	1064.84	1185.43	1128.5	1156.82	1014.82	1110.78	1065.96	1102.95	1092.29	1048.99
ENSMUSG00000006418.17	Rnf114	chr2	167492645	167516173	23528	-0.0696144	0.103044	-0.675577	0.499309	0.780395	0.0352274	0.103145	0.341533	0.732702	0.983753	1855.26	2013.02	1958.14	1994.12	1706.04	2059.54	2292.37	1974	1689.99	1763.92	1993.15	1665.51	2091.55	1841.69	2233.83
ENSMUSG00000006423.15	C330007P06Rik	chrX	36823737	36874111	50374	0.0129791	0.0864159	0.150194	0.880612	0.961652	0.00357487	0.086653	0.0412551	0.967093	0.998383	1914.37	1901.67	1896.29	1685.74	2030.95	2089.6	1800.4	1946.67	2027.98	1850.79	1832.03	2139.59	1869.3	1859.74	1716.53
ENSMUSG00000006435.15	Neurl1a	chr19	47178820	47259440	80620	-0.221915	0.0925928	-2.39668	0.0165445	0.142159	-0.113916	0.0926219	-1.2299	0.218733	0.790342	7782.21	8445.4	9205.13	8236.21	8253.54	9142.63	8149.22	8288.34	6427.27	7998.96	8414.26	8709.67	8346.85	9344.28	10419.7
ENSMUSG00000006442.10	Srm	chr4	148591503	148594993	3490	0.00338308	0.12136	0.0278764	0.977761	0.992478	-0.0231311	0.121819	-0.189881	0.849403	0.991148	494.802	484.324	493.406	476.022	426.778	453.499	580.999	498.129	522.521	461.93	496.629	379.264	627.097	462.56	504.703
ENSMUSG00000006445.3	Epha2	chr4	141301240	141329384	28144	-0.185677	0.123388	-1.50483	0.132368	NA	-0.048906	0.122719	-0.39852	0.690247	NA	3.2268	6.4315	7.6338	6.20898	4.28923	0	15.2278	6.17151	1.77426	3.06591	1.89553	3.83095	4.61101	9.49815	12.5951
ENSMUSG00000006456.10	Rbm14	chr19	4800569	4811634	11065	0.00679467	0.0566599	0.11992	0.904546	0.96879	-0.0161338	0.0569221	-0.283436	0.776842	0.984875	3339.73	3285.8	3323.3	3169.68	3296.27	3342.36	3334.89	3350.25	3215.85	3305.05	3487.78	3213.21	3157.62	3381.34	3541.02
ENSMUSG00000006457.3	Actn3	chr19	4861223	4877909	16686	0.164458	0.152902	1.07558	0.282117	0.615309	-0.0813324	0.154485	-0.526474	0.598559	0.961843	83.6707	65.3012	71.2493	73.4729	70.7722	51.3631	65.5967	78.4664	105.569	77.6697	72.9779	81.4077	45.1879	69.3365	89.0652
ENSMUSG00000006462.6	A530013C23Rik	chr2	167691177	167729172	37995	0.363848	0.144233	2.52264	0.0116478	0.115826	0.269702	0.145477	1.85391	0.0637526	0.516132	113.636	104.597	81.1268	78.6471	126.532	126.529	86.6814	131.365	103.794	123.658	95.7243	74.7036	72.8539	96.8811	80.0687
ENSMUSG00000006463.13	Zdhhc24	chr19	4878668	4885397	6729	0.0438464	0.0925251	0.473887	0.635581	0.855252	-0.00201696	0.0928979	-0.0217116	0.982678	0.998383	1230.95	1189.39	1190.97	1259.39	1024.05	1282.82	1191.28	1213.14	1304.97	1178.33	1227.36	1139.71	1371.31	1211.96	1040.89
ENSMUSG00000006464.8	Bbs1	chr19	4886898	4906627	19729	0.0893917	0.0641593	1.39328	0.163536	0.480562	0.0860897	0.0644531	1.3357	0.181648	0.756164	2355.17	2348.99	2208.18	2539.47	2207.88	2191.07	2457.53	2412.18	2256.86	2330.09	2421.54	2163.53	2200.37	2270.06	2198.74
ENSMUSG00000006469.13	Slc34a3	chr2	25228898	25234364	5466	-0.038423	0.0655121	-0.586502	0.557538	NA	-0.0552277	0.0643738	-0.857922	0.390935	NA	0.914705	0.606032	1.62455	0	0	1.25276	1.17137	1.76329	0	0	1.89553	0	0	3.79926	2.69895
ENSMUSG00000006471.18	Ndor1	chr2	25244821	25256022	11201	-0.0264233	0.0653455	-0.404362	0.685946	0.879576	-0.0205095	0.0656363	-0.312471	0.754682	0.984462	2234	2243.11	2276.83	2410.12	2096.36	2138.46	2327.51	2166.2	2300.33	2242.2	2227.25	2134.8	2401.41	2248.21	2322.89
ENSMUSG00000006476.19	Nsmf	chr2	25054355	25062881	8526	-0.125254	0.0949502	-1.31916	0.187117	0.512882	0.0678594	0.0950036	0.714283	0.475052	0.933777	1951.41	2259.67	2146.42	2496.01	2289.37	2001.91	2251.37	1839.99	2064.36	2066.42	1834.87	1848.43	2491.79	2214.97	2030.51
ENSMUSG00000006490.3	Prl8a9	chr13	27557995	27564606	6611	-0.0345219	0.0820395	-0.420796	0.673904	NA	0.00195861	0.0805211	0.0243242	0.980594	NA	0.936	1.46635	1.38583	1.03483	1.07231	3.75828	0	0	1.77426	1.02197	0.947766	0	1.8444	1.89963	1.7993
ENSMUSG00000006494.11	Pdk1	chr2	71873224	71903858	30634	0.0097752	0.111793	0.0874399	0.930322	0.97795	0.0909186	0.111924	0.812324	0.416606	0.910246	1357.66	1448.13	1347.33	1653.66	1332.88	1487.02	1318.96	1364.79	1343.12	1328.56	1394.16	1471.09	1501.34	1438.97	977.918
ENSMUSG00000006498.16	Ptbp1	chr10	79854427	79864771	10344	0.119999	0.0867947	1.38256	0.1668	0.484197	0.0684153	0.0870998	0.785482	0.432171	0.914484	1723.72	1657.95	1575.65	1795.43	1680.3	1484.52	1671.54	1630.16	1814.18	1680.12	1770.43	1322.64	1682.1	1647.93	1649.96
ENSMUSG00000006517.5	Mvd	chr8	122433601	122443422	9821	-0.129415	0.1472	-0.879177	0.379305	0.697466	-0.0226153	0.147665	-0.153153	0.878278	0.992567	108.072	119.878	122.175	104.518	129.749	132.792	112.451	125.194	109.117	89.9334	108.045	73.7458	144.786	124.426	145.743
ENSMUSG00000006519.11	Cyba	chr8	122424776	122432930	8154	0.0154705	0.118677	0.130358	0.896283	NA	-0.0084729	0.116542	-0.0727028	0.942043	NA	3.48439	3.11444	3.24039	3.10449	1.07231	1.25276	7.02822	2.64493	4.43566	3.06591	3.79106	0.957738	6.45541	2.84944	2.69895
ENSMUSG00000006522.16	Itih3	chr14	30908576	30923587	15011	0.242141	0.161954	1.49513	0.134882	0.440038	0.0225418	0.161395	0.139668	0.888922	NA	45.1367	30.6478	29.2706	17.5921	25.7354	30.0662	49.1975	46.7272	26.614	27.5932	79.6123	20.1125	26.7439	18.0465	52.1796
ENSMUSG00000006526.12	Tmem110	chr14	30825594	30877209	51615	-0.0138599	0.0687326	-0.201649	0.840191	0.945095	-0.0486216	0.0688944	-0.705741	0.480349	0.935156	4383.76	4274.83	4428.25	4207.62	4479.02	4596.37	3816.32	4600.42	4304.36	4384.25	4245.99	4648.86	4170.2	4446.08	4447.86
ENSMUSG00000006527.15	Sfmbt1	chr14	30714849	30822721	107872	-0.0187563	0.112041	-0.167405	0.867051	0.957132	-0.00702424	0.112081	-0.062671	0.950028	0.99752	6159.3	6217.2	6252.07	5998.91	6680.47	7232.18	4957.24	6158.29	5886.12	6472.14	6120.67	7563.26	5227.96	6469.19	5747.86
ENSMUSG00000006529.15	Itih1	chr14	30929180	30943289	14109	-0.0190229	0.0992707	-0.191627	0.848035	NA	0.00373494	0.0973273	0.038375	0.969389	NA	1.62892	1.87319	1.87922	3.10449	3.21692	0	1.17137	1.76329	0.887132	1.02197	2.8433	2.87321	1.8444	1.89963	0.899649
ENSMUSG00000006538.12	Ihh	chr1	74945315	74951672	6357	-0.20662	0.15082	-1.36998	0.170693	NA	0.0500819	0.150723	0.332279	0.739679	NA	5.75914	11.1234	9.8493	9.31347	7.50615	11.2748	16.3992	4.40822	1.77426	10.2197	6.63436	10.5351	11.0664	13.2974	4.49824
ENSMUSG00000006542.13	Prkag3	chr1	74738922	74749221	10299	-0.00125688	0.0929042	-0.0135287	0.989206	NA	-0.0489419	0.091071	-0.537404	0.590989	NA	2.26121	1.50049	2.29549	0	1.07231	3.75828	1.17137	3.52658	3.54853	1.02197	0.947766	0	5.53321	0.949815	2.69895
ENSMUSG00000006546.3	Cryba2	chr1	74889934	74893143	3209	-0.109777	0.130144	-0.843502	0.398948	NA	-0.0212997	0.128771	-0.165408	0.868623	NA	3.15938	4.68534	4.90683	2.06966	3.21692	8.76931	4.68548	6.17151	3.54853	1.02197	1.89553	5.74643	5.53321	4.74907	3.59859
ENSMUSG00000019810.15	Fuca2	chr10	13499540	13519035	19495	0.290798	0.0752149	3.86623	0.000110529	0.00465349	0.0140512	0.0762341	0.184317	0.853765	0.99135	1180.87	964.401	954.647	989.297	931.834	994.69	941.781	1105.58	1286.34	1123.14	1208.4	943.372	1013.5	994.456	867.261
ENSMUSG00000006574.15	Slc4a1	chr11	102348824	102366203	17379	-0.0368708	0.165393	-0.222928	0.823591	NA	-0.00315521	0.164844	-0.0191406	0.984729	NA	12.4733	13.2217	13.2867	13.4528	13.94	13.7803	11.7137	18.5145	11.5327	12.2636	7.58212	14.3661	11.9886	13.2974	13.4947
ENSMUSG00000006575.14	Rundc3a	chr11	102393403	102402555	9152	0.00840385	0.0811646	0.103541	0.917534	0.973455	0.0314067	0.0813031	0.386291	0.699281	0.97749	3190.57	3244.61	3170.73	3448.05	3412.08	2852.53	3265.78	3146.59	3309	3175.26	3131.42	2917.27	3627.02	3055.55	3083.1
ENSMUSG00000006576.16	Slc4a3	chr1	75546266	75562172	15906	0.043275	0.071634	0.604112	0.545769	0.808987	0.136033	0.0717454	1.89606	0.0579525	0.496184	3392	3628.57	3286.87	3937.53	3512.88	3217.08	3846.78	3420.78	3348.92	3197.74	3600.56	3211.3	3380.79	3280.66	3274.72
ENSMUSG00000006585.3	Cdt1	chr8	122568015	122573554	5539	0.0337001	0.157196	0.214383	0.830249	NA	0.0305822	0.156236	0.195744	0.844811	NA	13.0563	13.0427	12.0724	10.3483	4.28923	18.7914	18.7419	6.17151	12.4198	19.4174	14.2165	13.4083	11.9886	7.59852	15.294
ENSMUSG00000006586.15	Runx1t1	chr4	13743436	13893649	150213	0.0469137	0.0615379	0.762355	0.445848	0.74806	-0.0763983	0.0615623	-1.24099	0.214609	0.785694	44850.3	41047.7	43363.7	41077.6	38584.8	40351.4	44177	45892.2	43344.4	44250.3	45914.5	43325.2	40922.7	42452	46754.7
ENSMUSG00000007030.8	Vwa7	chr17	35016579	35026741	10162	-0.03853	0.142467	-0.270449	0.786815	0.925803	0.743587	0.14024	5.30226	1.14378e-07	5.14428e-05	67.0285	134.863	69.4351	151.085	117.954	141.562	128.851	77.5847	54.115	64.3841	72.0302	67.9994	80.2316	50.3402	79.1691
ENSMUSG00000006589.8	Aprt	chr8	122574635	122576909	2274	0.101402	0.147213	0.688809	0.490944	0.775616	-0.0398137	0.14828	-0.268503	0.788312	0.986412	130.364	113.91	118.483	136.598	117.954	120.265	80.8245	115.495	158.797	127.746	119.418	100.562	161.385	95.9313	116.055
ENSMUSG00000006599.13	Gtf2h1	chr7	46796103	46823800	27697	0.0333902	0.0663876	0.502959	0.614993	0.845419	0.0632797	0.066626	0.949775	0.342227	0.874877	2412.95	2466.56	2355.95	2474.28	2308.68	2462.92	2620.35	2357.52	2631.23	2219.72	2443.34	2414.46	2306.43	2342.24	2360.68
ENSMUSG00000006611.15	Hfe	chr13	23702034	23710854	8820	0.055566	0.127719	0.435064	0.663516	NA	0.0686052	0.126725	0.54137	0.588253	NA	8.08665	8.5601	6.45439	1.03483	11.7954	5.01103	16.3992	11.4614	7.09706	7.15379	6.63436	0.957738	2.76661	9.49815	12.5951
ENSMUSG00000006638.14	Abhd1	chr5	30950066	30955091	5025	0.0749877	0.0934061	0.802813	0.422083	0.730206	0.036822	0.0938591	0.392312	0.694828	0.977018	968.431	940.61	914.967	1056.56	843.905	875.678	986.293	1006.84	886.245	885.026	1095.62	851.429	890.847	979.259	938.334
ENSMUSG00000006641.12	Slc5a6	chr5	31036036	31048924	12888	0.246014	0.107945	2.27907	0.0226626	0.170914	0.0993683	0.109045	0.911256	0.362161	0.885014	412.431	367.305	339.947	370.469	389.247	283.123	426.379	420.544	419.613	367.909	441.659	322.758	368.881	318.188	349.963
ENSMUSG00000006649.17	Nphs1	chr7	30458315	30487223	28908	-0.159603	0.16241	-0.982718	0.325746	0.652185	-0.234493	0.16197	-1.44775	0.147686	NA	31.2964	27.0464	41.183	8.27864	37.5307	22.5497	39.8266	34.3841	15.9684	25.5492	49.2838	24.9012	46.1101	37.0428	56.6779
ENSMUSG00000006651.8	Aplp1	chr7	30434982	30445535	10553	0.0741712	0.0998325	0.742956	0.457508	0.753738	-0.059271	0.0999274	-0.593141	0.553087	0.952174	5517.12	4978.26	5210.94	5216.58	4649.52	4491.14	5555.81	5298.68	5814.26	5630.03	5325.49	4454.44	6342.9	5229.68	4816.72
ENSMUSG00000006673.14	Qrich1	chr9	108516806	108560163	43357	-0.0692365	0.062067	-1.11551	0.264631	0.597034	-0.0518607	0.0621304	-0.834708	0.403882	0.904551	10507.9	10640.1	11044	10466.3	10308.1	10654.7	11131.5	10676.7	10003.3	10695.9	10655.7	11404.7	9945.02	11131.8	11694.5
ENSMUSG00000006675.10	P4htm	chr9	108578862	108597667	18805	0.0812851	0.0573733	1.41678	0.156548	0.472033	-0.0746225	0.0582706	-1.28062	0.200327	0.772692	1442.78	1290.51	1361.74	1297.68	1296.42	1249	1318.96	1480.28	1419.41	1366.37	1505.05	1382.02	1316.9	1389.58	1358.47
ENSMUSG00000006676.16	Usp19	chr9	108490602	108502337	11735	-0.00279078	0.0956019	-0.0291917	0.976712	0.991985	0.0531605	0.095729	0.555323	0.578673	0.95848	2244.17	2341.35	2248.65	2452.55	2315.11	1949.29	2648.47	2175.9	2202.75	2342.36	2255.68	1913.56	2468.73	2244.41	2367.88
ENSMUSG00000006678.6	Pola1	chrX	93304767	93632155	327388	0.0303984	0.0803966	0.378106	0.705352	0.888485	-0.0356677	0.0805005	-0.443075	0.657712	0.971647	6033.09	5745.64	5898.76	5204.16	6040.3	6127.24	5610.86	5780.94	5991.69	6747.05	5612.67	6466.65	5503.7	5695.09	5929.58
ENSMUSG00000006699.17	Cdc42	chr4	137319696	137357720	38024	-0.0841421	0.0533728	-1.5765	0.114911	0.407478	-0.0477902	0.0534593	-0.893955	0.371346	0.889719	8580.78	8805.26	9109.58	8465.94	8991.29	8744.26	9019.55	8499.05	8094.19	9033.19	8696.7	8678.06	9360.35	9169.51	9230.4
ENSMUSG00000006705.12	Pknox1	chr17	31564749	31607684	42935	0.0315622	0.0721278	0.437588	0.661685	0.868773	-0.00930207	0.0725519	-0.128213	0.897981	0.993536	1590.06	1542.82	1553.92	1542.93	1640.63	1435.66	1552.06	1618.7	1482.4	1537.04	1722.09	1599.42	1425.72	1590.94	1599.58
ENSMUSG00000006711.15	D130043K22Rik	chr13	24845135	24901270	56135	-0.13097	0.0850313	-1.54025	0.123499	0.422762	0.0747855	0.0850523	0.879288	0.379245	0.891869	5119.59	5968.71	5645.11	6307.29	5485.92	6600.79	5480.84	5253.72	5297.95	4826.76	5099.93	6256.9	5634.65	5760.63	4928.28
ENSMUSG00000006715.11	Gmnn	chr13	24751845	24761923	10078	0.264026	0.136335	1.93659	0.0527953	0.273506	-0.15166	0.139165	-1.08979	0.275807	0.833632	136.598	94.5628	108.521	88.9954	92.2184	93.9569	103.081	128.72	141.941	116.505	159.225	87.1542	89.4536	139.623	117.854
ENSMUSG00000006717.7	Acot13	chr13	24817948	24831540	13592	0.321248	0.096629	3.32455	0.000885616	0.0222206	0.117477	0.0971638	1.20906	0.226641	0.798146	1257.01	1076.34	983.725	1138.31	891.087	1027.26	1248.68	1296.9	1304.08	1133.36	1293.7	950.076	1087.28	957.413	940.133
ENSMUSG00000006720.16	Zfp184	chr13	21945094	21960779	15685	-0.18303	0.137645	-1.32972	0.18361	0.507428	-0.0475235	0.138059	-0.344227	0.730676	0.983406	146.297	165.402	172.239	145.911	173.714	215.474	126.508	145.471	137.505	128.768	173.441	192.505	157.697	196.612	142.145
ENSMUSG00000006724.12	Cyp27b1	chr10	127048250	127053006	4756	0.135253	0.138797	0.974469	0.329824	0.655387	-0.228016	0.141608	-1.61019	0.107356	0.632611	113.109	81.0136	100.014	90.0302	78.2784	71.4072	84.3386	104.034	92.2617	133.878	122.262	77.5768	99.5978	97.8309	125.051
ENSMUSG00000006728.12	Cdk4	chr10	127063534	127067920	4386	0.11802	0.0950541	1.2416	0.214383	0.545886	0.0626778	0.0954032	0.656978	0.511195	0.942903	1294.16	1240.91	1183.24	1300.78	1125.92	1096.16	1440.78	1319.82	1304.08	1128.25	1424.49	1121.51	1227.45	1242.36	1141.65
ENSMUSG00000006731.10	B4galnt1	chr10	127165225	127172330	7105	-0.0404115	0.0998687	-0.404647	0.685737	0.879487	-0.109621	0.100051	-1.09565	0.27323	0.831454	2355.98	2232.93	2430.07	2462.9	2285.09	2049.51	2134.24	2181.19	2349.13	2509.96	2383.63	1970.07	2886.49	2508.46	2355.28
ENSMUSG00000006732.14	Mettl1	chr10	127041414	127046365	4951	-0.0469022	0.130435	-0.359584	0.719158	0.89483	-0.212431	0.13154	-1.61495	0.106321	0.630836	244.233	211.801	254.038	221.454	188.726	217.98	219.046	202.778	262.591	218.702	292.86	190.59	287.727	235.554	302.282
ENSMUSG00000006736.9	Tspan31	chr10	127067280	127070264	2984	-0.0321458	0.10747	-0.299114	0.764853	0.914999	-0.057773	0.108012	-0.534877	0.592735	0.961049	575.495	564.709	590.41	547.425	467.526	611.346	632.54	640.955	542.038	491.568	627.421	518.136	631.708	612.63	599.166
ENSMUSG00000006740.13	Kif5b	chr18	6201002	6242174	41172	-0.0619112	0.0547767	-1.13025	0.258373	0.591409	-0.0841841	0.0549755	-1.5313	0.125695	0.669414	4584.45	4513.28	4791.35	4431.14	4164.84	4680.31	4776.85	4653.32	4578.49	4606.02	4499.99	4808.8	4688.47	4778.52	4889.59
ENSMUSG00000006763.14	Saal1	chr7	46686108	46710680	24572	0.0506012	0.0804298	0.629136	0.52926	0.798368	0.00181203	0.0810522	0.0223563	0.982164	0.998383	942.034	908.784	907.856	945.835	853.556	850.623	985.122	965.401	990.926	896.268	915.542	932.837	987.678	898.525	812.383
ENSMUSG00000006764.8	Tph2	chr10	115078641	115185022	106381	-0.175031	0.165483	-1.05769	0.290195	0.622115	-0.196345	0.165857	-1.18382	0.236483	NA	27.438	26.6714	34.1632	18.6269	40.7476	25.0552	22.256	31.7392	30.1625	19.4174	28.433	41.1827	28.5883	39.8922	26.9895
ENSMUSG00000019975.12	Ikbip	chr10	91082940	91102607	19667	0.418346	0.101062	4.13951	3.48054e-05	0.00189617	0.20017	0.102837	1.94649	0.051596	0.471503	354.716	299.979	256.96	292.857	310.969	304.42	291.671	326.208	371.708	335.206	385.741	299.772	216.717	262.149	249.203
ENSMUSG00000006782.16	Cnp	chr11	100574904	100591729	16825	-0.0113909	0.0938316	-0.121398	0.903376	0.968448	0.00909305	0.0939466	0.0967896	0.922893	0.994941	3021.09	3068.97	3047.46	3093.11	2656.1	3007.87	3518.79	3317.63	2868.1	2711.29	3187.34	2860.76	2914.16	3006.16	3408.77
ENSMUSG00000006784.14	Ttc25	chr11	100545607	100572568	26961	0.156387	0.138889	1.12599	0.260172	0.592926	-0.025826	0.140281	-0.184102	0.853934	0.99135	155.914	132.367	135.788	165.573	107.231	110.243	146.421	186.027	144.603	132.856	160.172	126.421	108.82	157.669	150.241
ENSMUSG00000006800.13	Sulf2	chr2	166073089	166155663	82574	-0.171166	0.146272	-1.17019	0.241923	0.57477	0.159876	0.146267	1.09304	0.274376	0.833085	3063.97	4177.93	3599.77	4569.81	4805.01	3939.93	3396.97	2651.1	3593.77	4115.47	1895.53	3376.03	4443.17	3335.75	3244.13
ENSMUSG00000006818.4	Sod2	chr17	13007839	13018119	10280	0.0264584	0.076313	0.346708	0.728811	0.899503	-0.0803039	0.0767276	-1.04661	0.295279	0.848923	1852.41	1713.71	1817.11	1687.81	1477.64	1796.46	1892.93	1882.31	1891.37	1753.7	1882.26	1801.51	1808.44	1900.58	1757.91
ENSMUSG00000006850.7	Tmco6	chr18	36735068	36742391	7323	0.157657	0.11115	1.41842	0.156069	0.471503	0.0838619	0.111814	0.750014	0.453246	0.92351	514.482	485.141	454.045	547.425	404.26	418.421	570.457	488.431	546.473	475.216	547.808	419.489	477.701	502.452	416.537
ENSMUSG00000006906.10	Stambp	chr6	83543211	83572729	29518	-0.0976078	0.0682171	-1.43084	0.152476	0.465617	0.0564114	0.0683494	0.825338	0.40918	0.907963	1991.27	2226.93	2137.4	2271.45	2100.65	2164.77	2370.85	2063.05	1967.66	1869.18	2065.18	2076.38	2239.11	1983.21	2250.92
ENSMUSG00000006920.14	Ezh1	chr11	101191115	101226463	35348	0.0841456	0.0627353	1.34128	0.17983	0.502977	0.0667512	0.0630047	1.05946	0.289388	0.843468	2794.33	2760.29	2630.15	2776.45	2557.45	2836.25	2871.03	2860.94	2727.93	2694.93	2893.53	2608.88	2772.14	2450.52	2689.05
ENSMUSG00000006930.15	Hap1	chr11	100347327	100356128	8801	-0.0483447	0.131471	-0.367721	0.713081	0.891777	-0.240475	0.131745	-1.82531	0.0679544	0.530536	1044.57	884.667	1088.43	1051.39	820.314	722.842	944.124	998.021	817.048	1206.95	1156.27	951.034	881.625	1350.64	1170.44
ENSMUSG00000006931.15	P3h4	chr11	100408456	100414836	6380	0.151503	0.142041	1.06661	0.286146	0.61835	0.0698265	0.144284	0.483951	0.628421	0.967749	63.0234	58.2423	54.9064	69.3336	60.0492	43.8466	59.7398	61.7151	64.7606	59.2743	66.3436	55.5488	54.4099	49.3904	60.2765
ENSMUSG00000006932.17	Ctnnb1	chr9	120929216	120960507	31291	0.0973665	0.0784279	1.24148	0.214429	0.545886	0.0709286	0.078507	0.903468	0.366278	0.886136	7185.21	7047.82	6688.4	7108.25	6121.8	7868.58	7092.64	7481.63	7276.26	6690.84	7292.11	6581.58	7056.69	6886.16	6229.17
ENSMUSG00000006941.5	Eif1b	chr9	120492232	120495330	3098	0.099085	0.135123	0.733296	0.463378	0.75682	0.00827718	0.136222	0.0607624	0.951548	0.997521	173.196	160.264	158.837	149.016	124.388	177.892	189.762	186.909	156.135	182.933	166.807	141.745	194.585	176.666	122.352
ENSMUSG00000006958.13	Chrd	chr16	20733127	20742384	9257	-0.059755	0.144512	-0.413495	0.679244	0.877388	-0.0903293	0.144761	-0.623989	0.532635	0.947709	445.463	432.834	470.857	520.519	425.706	437.213	347.897	414.373	562.442	475.216	329.822	483.658	587.443	492.954	319.375
ENSMUSG00000006998.15	Psmd2	chr16	20651652	20663414	11762	-0.00240291	0.0616162	-0.038998	0.968892	0.989536	-0.0368385	0.0622126	-0.592138	0.553758	0.952174	1366.67	1333.28	1369	1397.02	1231.01	1304.12	1400.96	1354.21	1387.47	1346.96	1378.05	1328.38	1414.66	1342.09	1390.86
ENSMUSG00000007021.4	Syngr3	chr17	24685092	24689955	4863	0.0636231	0.119548	0.532195	0.594591	0.835231	0.0036378	0.119893	0.030342	0.975794	0.998383	779.259	741.628	739.528	773.018	722.735	677.742	793.017	677.103	814.387	902.399	723.145	578.474	930.502	779.798	669.339
ENSMUSG00000007029.16	Vars	chr17	35000987	35016322	15335	-0.0744382	0.0665631	-1.11831	0.263435	0.596103	-0.0612865	0.0672325	-0.91156	0.362	0.884925	912.223	919.743	962.348	968.601	937.196	843.107	930.067	862.248	908.423	949.41	928.81	980.724	927.735	978.309	962.624
ENSMUSG00000008845.9	Cd163	chr6	124304656	124330527	25871	0.122637	0.0964587	1.2714	0.203588	0.532989	0.580729	0.0963815	6.02532	1.68779e-09	1.30997e-06	2565.69	3638.48	2336.04	3983.06	3524.67	3359.9	3686.3	2841.54	2308.32	2293.3	2819.6	2273.67	2268.62	2103.84	2698.05
ENSMUSG00000007033.4	Hspa1l	chr17	34972703	34979285	6582	0.256911	0.134599	1.90871	0.0562991	0.282504	0.0284259	0.136875	0.207677	0.835481	0.991148	122.49	100.674	98.0991	92.0999	84.7122	105.232	120.651	125.194	127.747	118.549	118.471	92.9006	107.898	118.727	72.8715
ENSMUSG00000007034.15	Slc44a4	chr17	34914466	34930436	15970	-0.0823593	0.142337	-0.578624	0.562843	NA	-0.108622	0.140796	-0.771487	0.440418	NA	7.26679	6.72306	9.13058	5.17415	1.07231	11.2748	9.37096	6.17151	9.75845	11.2417	1.89553	9.57738	8.29982	12.3476	6.29754
ENSMUSG00000007035.15	Msh5	chr17	35028605	35046745	18140	0.101241	0.162157	0.624342	0.532403	0.800206	0.293074	0.162398	1.80466	0.0711276	NA	32.2704	39.587	28.6719	56.9156	40.7476	32.5717	28.1129	31.7392	29.2754	36.7909	31.2763	31.6054	24.8994	28.4944	29.6884
ENSMUSG00000007036.15	Abhd16a	chr17	35089263	35102987	13724	0.0446247	0.0851798	0.523888	0.600357	0.838577	0.0940361	0.0853656	1.10157	0.270649	0.828839	1947.87	2020.28	1884.45	2212.47	2111.37	1687.47	2069.81	1949.32	2062.58	1851.81	1927.76	1917.39	1977.2	1934.77	1708.43
ENSMUSG00000007038.5	Neu1	chr17	34931253	34935953	4700	0.0838486	0.0954012	0.878905	0.379453	0.697466	0.210142	0.096038	2.18811	0.0286613	0.366144	295.885	325.454	277.226	309.414	339.921	306.926	345.554	264.493	307.835	324.986	286.225	250.927	300.638	281.145	276.192
ENSMUSG00000007039.12	Ddah2	chr17	35059035	35062095	3060	0.0333178	0.124996	0.26655	0.789815	NA	0.233894	0.124633	1.87667	0.0605639	NA	4.3991	9.40449	3.67924	2.06966	11.7954	5.01103	18.7419	4.40822	4.43566	3.06591	5.68659	3.83095	3.68881	0	7.19719
ENSMUSG00000007041.9	Clic1	chr17	35049966	35058749	8783	0.159906	0.15837	1.0097	0.31264	NA	-0.0426255	0.157067	-0.271384	0.786096	NA	19.9714	13.3159	14.5633	2.06966	16.0846	17.5386	17.5705	16.7512	18.6298	25.5492	18.9553	6.70417	12.9108	16.1468	22.4912
ENSMUSG00000007050.17	Lsm2	chr17	34981862	34985891	4029	-0.00676784	0.14201	-0.0476576	0.961989	0.987463	-0.178336	0.143495	-1.2428	0.21394	0.785092	124.209	106.142	125.05	106.587	84.7122	92.7041	140.564	118.14	129.521	103.219	145.956	100.562	117.12	153.87	128.65
ENSMUSG00000019978.16	Epb41l2	chr10	25359798	25523519	163721	0.356431	0.09285	3.83878	0.000123647	0.00501793	0.0580696	0.092956	0.6247	0.532168	0.947709	8546.52	6818.8	6525.34	6657.06	7096.52	6209.92	7311.69	9023.63	9101.09	7408.26	8653.1	6477.18	5929.76	6046.52	7647.91
ENSMUSG00000007097.14	Atp1a2	chr1	172271709	172298064	26355	-0.0181043	0.148463	-0.121945	0.902943	0.9683	-0.0526389	0.148446	-0.354599	0.72289	0.98159	805.341	736.505	842.501	589.853	623.01	533.675	1199.48	712.369	503.004	581.501	1424.49	495.151	606.809	409.37	1858.67
ENSMUSG00000007107.6	Atp1a4	chr1	172223513	172258414	34901	-0.0842031	0.160815	-0.523603	0.600554	0.838577	-0.0286547	0.16121	-0.177747	0.858922	0.992237	62.7286	67.0042	68.95	38.2887	79.3507	78.9238	71.4535	61.7151	79.8419	57.2303	52.1271	72.7881	47.9545	91.1822	63.8751
ENSMUSG00000007122.11	Casq1	chr1	172209894	172219868	9974	0.0283537	0.135762	0.208849	0.834566	0.943581	-0.0881165	0.136924	-0.643545	0.519871	0.945267	172.079	155.229	168.174	191.444	132.966	146.573	149.935	176.329	190.733	143.076	178.18	189.632	137.408	208.009	137.646
ENSMUSG00000007207.10	Stx1a	chr5	135023482	135051100	27618	-0.359845	0.147245	-2.44385	0.0145315	0.131791	-0.0127029	0.147231	-0.0862783	0.931245	0.995991	1307.39	1817.11	1838.64	1820.27	1889.4	2346.42	1212.37	1324.23	1385.7	1455.29	1064.34	1926.97	2275.99	1961.37	1190.24
ENSMUSG00000007209.4	Ceacam9	chr7	16721929	16726132	4203	-0.189694	0.151831	-1.24938	0.211526	NA	-0.103542	0.15124	-0.684617	0.493586	NA	11.4008	14.1267	17.8647	20.6966	10.7231	7.51655	17.5705	2.64493	21.2912	11.2417	10.4254	10.5351	30.4327	15.197	15.294
ENSMUSG00000007216.6	Zfp775	chr6	48602063	48623227	21164	0.28602	0.0957157	2.98823	0.002806	0.0470364	0.170071	0.0967095	1.75857	0.0786498	0.563129	540.746	494.897	434.966	523.624	467.526	429.696	558.743	524.578	539.376	503.831	595.197	482.7	399.313	435.015	422.835
ENSMUSG00000007279.14	Scube2	chr7	109798676	109865679	67003	0.128374	0.139599	0.919594	0.357785	0.679022	0.0876266	0.140094	0.625486	0.531652	0.947709	284.171	273.855	253.247	232.837	331.343	261.827	269.415	260.967	308.722	355.646	211.352	274.871	247.15	302.041	188.926
ENSMUSG00000007338.9	Mrpl49	chr19	6053630	6057751	4121	0.265922	0.107398	2.47604	0.0132849	0.125516	0.0580766	0.108352	0.535998	0.59196	0.960749	566.033	480.793	459.624	517.415	443.935	434.707	527.116	506.064	636.961	494.633	626.473	452.052	469.401	516.699	400.344
ENSMUSG00000007379.15	Dennd2c	chr3	103102604	103169769	67165	0.042995	0.166495	0.258237	0.796224	0.928932	0.0737848	0.166621	0.442831	0.657888	NA	24.0445	25.2088	22.7432	20.6966	26.8077	27.5607	25.7701	33.5025	17.7426	18.3955	26.5374	20.1125	15.6774	22.7955	32.3874
ENSMUSG00000007411.16	Mark3	chr12	111574523	111656221	81698	-0.20315	0.0716148	-2.83671	0.00455813	0.0648174	-0.107588	0.0716335	-1.50192	0.133116	0.681321	19853.4	21284.1	23019.1	21622.8	21424.7	21210.5	20878.5	20068	18220.8	21826.2	19298.4	22354.6	22032.3	21970.2	25719.2
ENSMUSG00000007415.15	Gatad1	chr5	3632932	3657185	24253	-0.00129396	0.0583572	-0.0221731	0.98231	0.993496	0.0125746	0.0588636	0.213623	0.830841	0.990618	1434.71	1449.37	1435.86	1390.81	1442.25	1509.57	1454.84	1400.05	1384.81	1446.09	1507.9	1450.97	1465.38	1455.12	1371.96
ENSMUSG00000007440.10	Pcdha11	chr18	37005203	37187657	182454	-0.274289	0.0825251	-3.3237	0.000888317	0.0222374	-0.0943988	0.0825341	-1.14375	0.252726	0.817442	17187.1	19641	21064.9	19063.6	20186.2	21630.1	17684.2	16974.3	16654.1	19482.8	15637.2	22801.8	20397.3	20313.7	20746.8
ENSMUSG00000007458.14	M6pr	chr6	122308720	122317680	8960	0.137783	0.114684	1.20141	0.229591	0.56362	0.0838743	0.114972	0.729518	0.465685	0.930407	1030.23	986.675	922.252	976.879	921.111	883.195	1165.51	995.377	1145.29	1036.28	943.975	770.021	1171.2	881.428	866.362
ENSMUSG00000007476.18	Lrrc8a	chr2	30237715	30263790	26075	-0.0162273	0.0775952	-0.209128	0.834349	0.943581	0.0541043	0.0777523	0.695854	0.48652	0.935631	2410.49	2538.3	2439.6	2529.12	2736.53	2425.34	2462.22	2532.08	2446.71	2364.84	2298.33	2209.5	2751.85	2506.56	2290.51
ENSMUSG00000007480.3	Mc5r	chr18	68337603	68339711	2108	-0.221092	0.15514	-1.42512	0.154124	NA	-0.0366129	0.154717	-0.236644	0.812933	NA	7.08507	11.0683	11.6644	6.20898	4.28923	15.0331	18.7419	5.28987	5.32279	9.19773	8.52989	11.4929	9.22202	14.2472	11.6954
ENSMUSG00000007564.14	Ppp2r1a	chr17	20945311	20965916	20605	0.087894	0.102741	0.855492	0.392279	0.707389	-0.04714	0.102907	-0.458083	0.646893	0.971403	2973.46	2677.77	2777.52	2602.6	2542.44	2429.1	3136.93	2845.07	3153.75	3040.36	2854.67	2535.13	3438.89	2588.24	2547.81
ENSMUSG00000007570.15	Fance	chr17	28313530	28326568	13038	0.207125	0.0865154	2.39409	0.0166617	0.142698	0.0142293	0.087602	0.162431	0.870966	0.992432	727.941	630.314	623.845	681.953	552.238	608.841	678.223	730.883	734.545	666.324	780.011	659.882	571.765	642.075	621.657
ENSMUSG00000007589.8	Tinf2	chr14	55679083	55681817	2734	0.167776	0.119133	1.40831	0.159039	0.474844	0.257625	0.119741	2.15152	0.0314351	0.381861	233.522	251.773	203.693	269.056	193.015	275.607	269.415	212.476	270.575	207.46	243.576	198.252	227.784	189.013	199.722
ENSMUSG00000007591.14	Tssk4	chr14	55650182	55652539	2357	0.0793538	0.149665	0.530208	0.595968	0.836271	0.0392657	0.151091	0.259881	0.794955	0.988032	61.4411	59.2214	57.114	61.055	65.4107	58.8797	51.5403	67.005	69.1963	47.0106	62.5525	45.9714	50.7211	75.9852	55.7782
ENSMUSG00000007594.10	Hapln4	chr8	70083457	70090862	7405	-0.0365801	0.153959	-0.237596	0.812194	0.93481	0.0746646	0.154029	0.484743	0.627859	0.967636	494.562	552.668	513.002	524.659	658.396	509.873	517.745	379.989	628.089	647.929	322.24	466.418	653.841	573.688	358.06
ENSMUSG00000007603.8	Dus3l	chr17	56764751	56770092	5341	0.0466114	0.086704	0.537592	0.590859	0.832944	0.0906646	0.0868806	1.04355	0.296692	0.849947	2040.35	2107.96	1970.39	2329.4	2126.38	1827.77	2148.29	1977.53	2213.39	2105.26	1865.2	1800.55	2162.56	1968.02	1950.44
ENSMUSG00000007610.15	Gtpbp3	chr8	71488103	71499583	11480	-0.0811443	0.0822811	-0.986183	0.324043	0.650602	0.0646862	0.0826961	0.782216	0.434088	0.914798	508.554	566.577	540.061	603.306	557.599	571.258	534.145	502.537	549.135	518.139	464.405	517.179	582.832	502.452	557.782
ENSMUSG00000007613.15	Tgfbr1	chr4	47353222	47414931	61709	-0.246973	0.088641	-2.78622	0.00533274	0.0711083	-0.186004	0.0889461	-2.0912	0.0365106	0.407733	1038.7	1086.9	1249.68	1022.41	1183.83	1101.17	1040.18	966.282	951.893	1121.1	1115.52	1362.86	1124.16	1173.02	1338.68
ENSMUSG00000007617.18	Homer1	chr13	93299635	93405129	105494	-0.35078	0.114931	-3.0521	0.00227249	0.041046	0.027924	0.114929	0.242967	0.808031	0.988506	46282	62769	61377.4	55627.3	61769.1	79557.7	54122	44393.4	40686.5	55059.7	44988.5	54108.4	69075.7	61430.2	60895.4
ENSMUSG00000007646.13	Rad51c	chr11	87376645	87404954	28309	-0.153801	0.132653	-1.15942	0.246284	0.580053	0.00185883	0.133008	0.0139753	0.98885	0.998383	171.619	195.89	196.018	189.374	261.643	160.353	172.191	155.169	180.975	191.108	159.225	217.407	191.818	215.608	159.238
ENSMUSG00000007653.12	Gabrb2	chr11	42419757	42629028	209271	-0.267239	0.0835028	-3.20035	0.00137259	0.0294207	0.0825709	0.0834989	0.988885	0.322719	0.861801	27283.2	35384	33278.6	32221.5	37116.8	38409.6	33788.2	26729.7	28456.5	28832.8	25113.9	36622	32591.5	34656.8	29244
ENSMUSG00000007655.16	Cav1	chr6	17306335	17341452	35117	-0.0647733	0.166675	-0.388622	0.697556	0.885064	-0.0451762	0.166703	-0.270998	0.786393	0.986068	44.4718	46.05	48.6413	30.0101	43.9646	73.9128	36.3125	43.2006	68.3092	26.5712	39.8062	39.2673	47.0323	39.8922	68.3733
ENSMUSG00000007656.13	Arpp19	chr9	75037614	75060313	22699	-0.0509452	0.116604	-0.436909	0.662177	0.86908	0.0838048	0.116621	0.718606	0.472383	0.932458	6382.46	7117.29	6650.86	6730.53	5980.25	6742.35	9016.03	6031.33	6521.31	6270.81	6706.39	5565.42	8189.15	6133.9	6714.98
ENSMUSG00000007659.18	Bcl2l1	chr2	152780668	152831728	51060	-0.0202406	0.0685284	-0.295361	0.767718	0.916332	-0.106937	0.0687117	-1.55631	0.119634	0.660374	4619.26	4337.56	4687.37	4270.74	4333.19	4033.88	4712.42	4856.98	4502.19	4652.01	4465.87	4392.19	4703.23	4546.76	5107.31
ENSMUSG00000007670.9	Khsrp	chr17	57021058	57031507	10449	-0.0537255	0.107406	-0.50021	0.616927	0.845995	-0.0684988	0.107615	-0.636516	0.52444	0.947313	1439.49	1422.44	1501.22	1584.32	1272.83	1247.75	1584.86	1385.94	1280.13	1413.38	1678.49	1314.02	1622.15	1397.18	1671.55
ENSMUSG00000007682.6	Dio2	chr12	90724552	90738438	13886	-0.190063	0.166093	-1.14431	0.252494	0.58604	-0.0295589	0.166127	-0.17793	0.858778	0.992236	85.2267	105.036	108.67	81.7516	89.0014	106.484	142.907	75.8214	87.8261	78.6917	98.5676	61.2952	98.6756	74.0855	200.622
ENSMUSG00000007721.6	Ccdc124	chr8	70868227	70873935	5708	-0.00359859	0.131285	-0.0274105	0.978132	0.992556	-0.222759	0.133454	-1.66918	0.0950808	0.604534	136.594	112.828	137.053	130.389	87.9291	106.484	126.508	148.998	127.747	136.944	132.687	126.421	168.763	140.573	112.456
ENSMUSG00000007739.10	Cct4	chr11	22990519	23003780	13261	-0.0876735	0.0911482	-0.961878	0.336111	0.660077	-0.0834808	0.0915032	-0.912326	0.361597	0.884534	1098.53	1102.4	1173.42	1126.93	894.304	1171.33	1217.05	1055.33	1065.45	1091.46	1181.86	1083.2	1199.78	1168.27	1242.41
ENSMUSG00000007777.9	0610009B22Rik	chr11	51685386	51688874	3488	0.133853	0.123606	1.0829	0.278853	0.612086	0.0828322	0.124418	0.665758	0.505566	0.941246	288.778	276.532	258.271	294.927	238.052	221.738	351.411	240.689	300.738	319.877	293.807	253.801	279.427	265.948	233.909
ENSMUSG00000007783.10	Cpt1c	chr7	44959372	44974851	15479	0.0382027	0.0736608	0.518631	0.604018	0.840111	0.0106755	0.0738514	0.144554	0.885063	0.993123	3283.44	3217.73	3192.96	3390.1	3117.19	2986.58	3377.06	3314.98	3162.63	3093.5	3562.65	2899.07	3253.53	3212.27	3406.97
ENSMUSG00000007805.4	Twist2	chr1	91801461	91848028	46567	-0.0659536	0.166618	-0.395836	0.692226	0.882866	0.169675	0.166621	1.01833	0.308521	0.854316	124.313	170.12	136.071	206.966	157.629	210.463	105.423	119.904	125.973	172.713	78.6645	205.914	142.019	140.573	55.7782
ENSMUSG00000007812.16	Zfp655	chr5	145231715	145247302	15587	0.0609766	0.0741424	0.822426	0.410834	0.721997	0.0580459	0.0743384	0.780834	0.4349	0.914798	2880.44	2875.41	2755.33	2812.67	2609.99	3040.45	3038.53	2823.91	3152.87	2683.69	2861.3	2941.21	2782.28	2687.03	2610.78
ENSMUSG00000007815.13	Rhoa	chr9	108306129	108337934	31805	0.0111192	0.0726325	0.153088	0.878328	0.960793	0.00933987	0.0729763	0.127985	0.898161	0.993536	1679.9	1677.99	1666.03	1667.11	1619.18	1793.95	1631.72	1742.13	1507.24	1677.05	1793.17	1637.73	1599.1	1627.98	1799.3
ENSMUSG00000007817.14	Zmiz1	chr14	25459185	25666743	207558	0.025755	0.0993542	0.259224	0.795463	0.928839	-0.0296286	0.0993968	-0.298084	0.765639	0.984462	9742.01	9335.46	9550.64	8919.2	9966.02	9275.43	9181.19	9309.28	9477.23	11445	8736.5	8821.73	11488.8	9433.56	8458.5
ENSMUSG00000007827.10	Ankrd26	chr6	118501308	118562226	60918	0.0130662	0.0572437	0.228255	0.819448	0.937442	0.126252	0.0574232	2.19862	0.0279051	0.3627	2504.57	2715.52	2481.26	2736.09	2752.61	2763.59	2609.81	2603.5	2419.21	2570.25	2425.33	2489.16	2322.1	2592.04	2521.72
ENSMUSG00000007833.15	Aldh16a1	chr7	45140684	45154584	13900	0.207958	0.154768	1.34368	0.179053	0.502027	-0.0364191	0.15584	-0.233696	0.815221	0.988667	111.764	87.349	90.9406	79.6819	93.2907	65.1435	111.28	105.797	155.248	81.7576	104.254	115.886	92.2202	85.4833	70.1726
ENSMUSG00000007836.6	Hnrnpa0	chr13	58125879	58128556	2677	0.157068	0.142666	1.10095	0.270919	0.602719	-0.227401	0.143609	-1.58347	0.113314	0.64642	318.387	223.95	276.056	193.513	150.123	259.321	292.842	284.771	330.013	340.316	318.449	243.265	336.604	303.941	220.414
ENSMUSG00000007837.11	Prrg2	chr7	45053584	45062677	9093	0.135588	0.14177	0.956395	0.338873	0.662516	0.0443831	0.143217	0.309901	0.756636	0.984462	103.431	95.1589	91.7275	123.145	85.7845	82.6821	89.0241	121.667	113.553	82.7796	95.7243	87.1542	87.6092	112.078	80.0687
ENSMUSG00000007850.16	Hnrnph1	chr11	50376990	50386528	9538	-0.0483043	0.0788791	-0.612384	0.540284	0.805157	-0.0827218	0.0789617	-1.04762	0.294814	0.848483	7006.71	6831.43	7260.46	6869.2	5948.08	6614.57	7893.86	6916.5	6918.74	7018.89	7172.69	6812.39	7211.62	7443.7	7574.14
ENSMUSG00000007867.9	Ift43	chr12	86082541	86162459	79918	-0.0724434	0.0624945	-1.1592	0.246376	0.580053	0.0673434	0.0625887	1.07597	0.281942	0.838677	3539.99	3914.14	3729.68	3928.21	4237.76	3817.16	3673.42	3821.93	3401.26	3512.51	3424.28	3777.32	3704.48	3772.66	3664.27
ENSMUSG00000007872.3	Id3	chr4	136143497	136145755	2258	0.0557219	0.142762	0.390313	0.696305	NA	-0.0027942	0.141117	-0.0198006	0.984202	NA	8.6914	7.31056	7.38001	5.17415	7.50615	2.50552	14.0564	5.28987	6.20992	7.15379	16.112	3.83095	10.1442	4.74907	10.7958
ENSMUSG00000007877.2	Tcap	chr11	98383811	98384953	1142	0.0871588	0.150414	0.579458	0.56228	NA	-0.0854075	0.148259	-0.576069	0.564568	NA	10.8352	6.82723	8.81026	9.31347	10.7231	3.75828	3.51411	3.52658	15.0812	14.3076	10.4254	8.61964	7.37761	6.6487	12.5951
ENSMUSG00000007880.16	Arid1a	chr4	133679008	133756769	77761	-0.00716099	0.0728328	-0.0983209	0.921677	0.975271	-0.123122	0.0728832	-1.6893	0.0911618	0.593685	16856.3	15488.4	16944.4	15492.4	15078.8	15978.9	15403.5	17554.4	15079.5	16548.8	18242.6	16723.1	15564.9	16954.2	18535.5
ENSMUSG00000007888.15	Crlf1	chr8	70493158	70504081	10923	-0.222512	0.166649	-1.33521	0.181808	0.504834	-0.203567	0.166686	-1.22126	0.221988	NA	21.1218	21.8432	28.4478	15.5224	20.3738	35.0772	16.3992	26.4493	19.5169	21.4614	17.0598	21.0702	28.5883	38.9424	25.1902
ENSMUSG00000007891.16	Ctsd	chr7	142375911	142388038	12127	0.110004	0.119994	0.916745	0.359276	0.679817	0.0451717	0.120295	0.375509	0.707282	0.978275	900.998	854.398	823.437	896.163	832.11	760.425	928.896	877.236	973.184	851.301	902.273	644.558	1106.64	776.948	765.601
ENSMUSG00000007892.8	Rplp1	chr9	61913284	61914542	1258	0.245444	0.152909	1.60516	0.108458	0.396422	0.0873066	0.154547	0.564921	0.572127	0.956568	65.5292	56.0782	51.2965	62.0898	46.1092	56.3741	59.7398	60.8335	71.8577	72.5599	56.8659	34.4786	70.0873	48.4405	52.1796
ENSMUSG00000007908.14	Hmgcll1	chr9	76014855	76136350	121495	-0.0395795	0.0724074	-0.546623	0.584638	0.829734	-0.00449082	0.0724418	-0.0619922	0.950569	0.99752	14521.1	14897.6	14946.4	14402.8	15326.5	16001.5	13859.6	14162.7	14550.7	15318.3	14052.5	16701	14391	14854.1	13839.3
ENSMUSG00000007944.8	Ttc9b	chr7	27653915	27657346	3431	0.0461989	0.119694	0.385975	0.699515	0.885684	-0.207898	0.122449	-1.69784	0.0895385	0.588843	158.951	129.201	153.134	134.528	98.6522	146.573	137.05	148.116	172.991	144.098	170.598	135.999	154.93	161.468	160.137
ENSMUSG00000007946.11	Phox2a	chr7	101818313	101822726	4413	0.0920791	0.108768	0.846562	0.397239	NA	0.0615549	0.106678	0.577018	0.563928	NA	3.25784	2.79403	1.88978	5.17415	1.07231	3.75828	1.17137	3.52658	1.77426	2.04394	5.68659	1.91548	1.8444	3.79926	0
ENSMUSG00000007950.9	Abhd8	chr8	71456705	71463655	6950	0.253522	0.105813	2.39595	0.0165774	0.142217	0.161098	0.106292	1.51562	0.129614	0.676988	854.355	794.22	700.725	895.128	841.761	618.863	821.13	862.248	856.082	831.884	867.205	607.206	766.35	779.798	649.546
ENSMUSG00000007987.12	Ift22	chr5	136908150	136915404	7254	0.158932	0.089361	1.77854	0.0753148	0.327571	0.134438	0.0898996	1.49542	0.134805	0.684856	840.577	824.673	746.117	909.615	834.254	691.523	863.299	850.787	869.389	817.576	824.556	734.585	801.393	784.547	663.941
ENSMUSG00000007989.7	Fzd3	chr14	65192449	65262463	70014	0.0632311	0.0614392	1.02917	0.303402	0.633029	0.00133392	0.0615533	0.021671	0.98271	0.998383	7957.56	7612.66	7604.36	7200.35	7238.07	8089.06	7923.14	8071.45	7805.87	7729.16	8223.76	7375.54	7952.15	7885.36	7204.39
ENSMUSG00000008028.15	1700008O03Rik	chr7	44360043	44385820	25777	0.147674	0.0839433	1.75922	0.0785408	0.335412	-0.0740852	0.0852145	-0.869397	0.38463	0.894849	699.963	592.41	627.225	663.326	624.082	521.148	561.086	671.813	691.963	681.654	754.421	622.53	614.186	665.82	606.363
ENSMUSG00000008035.12	Mid1ip1	chrX	10715013	10719690	4677	0.242282	0.136226	1.77853	0.0753176	0.327571	-0.124553	0.139693	-0.891621	0.372596	0.889957	100.41	72.4981	81.2183	77.6122	58.9769	71.4072	81.9959	96.9809	105.569	105.263	93.8288	65.1262	101.442	84.5335	73.7712
ENSMUSG00000008036.11	Ap2s1	chr7	16738410	16749294	10884	0.0144858	0.0862532	0.167945	0.866627	0.956977	-0.0182105	0.0870252	-0.209255	0.834249	0.991148	638.019	622.262	631.154	654.013	601.564	541.192	692.279	636.547	660.026	635.665	619.839	580.389	695.34	633.526	615.36
ENSMUSG00000008090.14	Fgfrl1	chr5	108692382	108706924	14542	-0.0528864	0.139806	-0.378284	0.70522	0.888468	-0.0756993	0.141293	-0.535761	0.592124	0.960749	84.1498	82.1266	88.0225	90.0302	82.5676	73.9128	81.9959	64.36	87.8261	85.8455	98.5676	68.9571	103.287	83.5837	96.2624
ENSMUSG00000008129.14	4930432K21Rik	chr8	84148025	84172590	24565	0.127801	0.137371	0.930338	0.352196	0.674335	0.0814715	0.137597	0.592103	0.553782	0.952174	688.791	661.207	615.359	675.744	757.048	734.117	477.919	731.765	665.349	612.16	745.891	800.669	553.321	663.92	443.527
ENSMUSG00000008136.14	Fhl2	chr1	43123074	43196984	73910	-0.0766933	0.164584	-0.465982	0.641228	0.858357	-0.00284003	0.164587	-0.0172555	0.986233	0.998383	3703.88	4046.77	4060.54	4660.87	4306.38	4590.11	2629.72	3847.5	4619.3	3858.96	2489.78	4619.17	4685.71	4600.9	2336.39
ENSMUSG00000008140.17	Emc10	chr7	44489937	44496529	6592	0.140543	0.124817	1.12599	0.260169	0.592926	-0.0179778	0.125177	-0.14362	0.885801	0.993206	881.87	772.633	784.385	818.55	683.059	711.567	877.356	891.342	848.985	882.982	904.168	610.079	1062.38	792.145	672.937
ENSMUSG00000008153.11	Clstn3	chr6	124430759	124464794	34035	-0.234779	0.0890468	-2.63658	0.00837461	0.0950113	0.109049	0.0890335	1.22481	0.220647	0.792968	6560.2	8494.09	7825.95	8336.59	8928.02	8778.08	7933.69	7044.34	6343.88	6382.2	6470.4	6451.32	8384.66	7608.96	8858.84
ENSMUSG00000008167.14	Fbxw9	chr8	85060055	85067124	7069	0.0842399	0.106053	0.794321	0.427009	0.733765	-0.0525579	0.107266	-0.489979	0.624149	0.966289	376.153	337.809	352.383	406.688	285.234	321.959	337.354	401.148	383.241	338.272	381.95	336.166	399.313	344.783	329.271
ENSMUSG00000008193.13	Spib	chr7	44525993	44532071	6078	0.00111418	0.147046	0.00757709	0.993954	NA	0.163884	0.14628	1.12035	0.262566	NA	5.16283	7.75529	5.12285	9.31347	8.57845	3.75828	9.37096	6.17151	2.6614	6.13182	5.68659	4.78869	6.45541	4.74907	4.49824
ENSMUSG00000008200.14	Fnbp4	chr2	90745370	90781021	35651	-0.0197048	0.0508824	-0.387262	0.698562	0.885239	0.0148865	0.0509869	0.291968	0.770311	0.984807	7587.13	7775.61	7694	7944.39	7535.1	7452.66	8170.3	7400.52	7751.76	7450.16	7746.09	7485.68	7986.27	7582.37	7721.69
ENSMUSG00000008206.16	Cers4	chr8	4493026	4531680	38654	0.0166202	0.0785206	0.211667	0.832367	0.942778	-0.0806694	0.0786856	-1.02521	0.305263	0.853266	4344.43	4043.52	4291.63	4382.5	3936.44	4127.84	3727.3	4281.27	4509.29	4626.46	3960.71	4393.14	4457	4514.47	3801.92
ENSMUSG00000008226.14	Scrn3	chr2	73312601	73337818	25217	0.191848	0.0930865	2.06096	0.0393064	0.232213	-0.00261888	0.0937468	-0.0279357	0.977713	0.998383	1062.39	917.045	919.07	944.8	835.327	934.558	953.495	1084.42	1043.27	1002.55	1119.31	1064.05	883.469	964.062	764.701
ENSMUSG00000008301.11	Phax	chr18	56562443	56587712	25269	0.0460957	0.0906078	0.508738	0.610936	0.843896	-0.00621062	0.0910869	-0.0681834	0.94564	0.997185	1015.96	977.02	981.333	1000.68	836.399	955.855	1115.14	983.915	1024.64	934.081	1121.21	937.626	1064.22	954.564	968.922
ENSMUSG00000008305.18	Tle1	chr4	72117142	72200919	83777	0.00539329	0.084446	0.0638668	0.949076	0.983242	-0.0495114	0.0844842	-0.586044	0.557846	0.952677	14599.6	14015	14541.2	13714.6	13722.3	13354.4	15268.8	15780.6	13297.2	13384.7	15935.7	14405.3	13068.5	14687.9	16003
ENSMUSG00000008307.11	1700109H08Rik	chr5	3571566	3584356	12790	0.0637781	0.0610734	1.04429	0.296353	0.627243	0.007295	0.0614286	0.118756	0.905469	0.994941	2518.05	2418.26	2405.53	2439.09	2311.89	2451.65	2470.42	2378.68	2640.1	2466.01	2587.4	2544.71	2469.66	2328.95	2278.81
ENSMUSG00000008318.10	Relt	chr7	100845847	100863446	17599	0.0442169	0.119009	0.371542	0.710234	0.890762	0.00310912	0.120075	0.0258931	0.979343	0.998383	236.152	227.955	227.579	211.105	276.655	216.727	207.332	202.778	245.736	266.734	229.359	234.646	267.439	200.411	207.819
ENSMUSG00000008333.12	Snrpb2	chr2	143063039	143072853	9814	0.139966	0.0752378	1.86031	0.0628414	0.299206	0.0527867	0.0762034	0.692707	0.488493	0.935631	761.049	713.804	686.665	719.207	669.119	690.27	776.618	711.487	792.209	814.51	725.988	715.43	684.274	667.72	679.235
ENSMUSG00000008348.9	Ubc	chr5	125385965	125390202	4237	0.0642566	0.143415	0.448047	0.654119	0.865308	-0.0464152	0.14402	-0.322283	0.747238	0.984462	250.56	226.625	236.141	201.792	152.268	245.541	306.899	242.452	258.155	264.69	236.941	177.182	289.571	240.303	237.507
ENSMUSG00000008373.16	Prpf31	chr7	3629985	3642486	12501	0.142162	0.0849283	1.67391	0.0941488	0.369915	-0.00376285	0.085844	-0.0438336	0.965037	0.998383	788.36	706.844	709.355	771.983	643.384	638.907	773.104	760.859	844.55	774.653	773.377	718.304	719.317	748.454	651.346
ENSMUSG00000008384.8	Sertad1	chr7	27486910	27490316	3406	0.475844	0.159603	2.98141	0.00286923	0.0477563	0.12044	0.160724	0.749357	0.453642	0.923837	93.3508	64.3375	56.1686	63.1246	57.9045	78.9238	57.3971	81.1113	141.941	73.5818	76.769	37.3518	62.7097	59.8383	64.7747
ENSMUSG00000008393.8	Carhsp1	chr16	8658587	8672153	13566	0.258831	0.116603	2.21976	0.026435	0.18745	-0.00452765	0.1172	-0.0386319	0.969184	0.998383	844.866	682.953	685.401	704.719	602.636	650.182	774.275	812.876	779.789	721.511	1065.29	634.98	698.107	606.931	801.587
ENSMUSG00000008398.15	Elk3	chr10	93247414	93311135	63721	0.0474135	0.097493	0.486327	0.626736	0.850685	-0.0226408	0.0976071	-0.231958	0.81657	0.988667	3968.06	3760.76	3826.45	3883.72	3590.08	3567.86	4001.4	4191.34	3467.8	3782.31	4430.8	3367.41	3593.82	3787.86	4556.72
ENSMUSG00000008429.8	Herpud2	chr9	25108132	25151820	43688	-0.123611	0.0719999	-1.71682	0.0860125	0.352053	-0.0438708	0.0720977	-0.608491	0.542862	0.949981	4118.49	4366.11	4507.04	3958.22	4416.83	4897.03	4192.33	4193.98	4036.45	3952.98	4290.53	4683.34	4654.35	4443.23	4247.24
ENSMUSG00000008435.15	Rdh13	chr7	4424770	4445649	20879	0.0672863	0.0509517	1.32059	0.186638	0.512129	0.0524048	0.0514922	1.01772	0.30881	0.854393	1780.59	1761.75	1697.93	1811.99	1734.99	1712.52	1787.51	1805.61	1814.18	1756.77	1745.78	1727.76	1704.23	1711.57	1648.16
ENSMUSG00000008438.3	Adam21	chr12	81558584	81568474	9890	0.22795	0.0973242	2.34218	0.0191717	0.15656	0.0784417	0.0983686	0.797427	0.425203	0.912554	546.707	487.687	459.246	473.952	501.839	528.664	446.292	535.158	518.085	562.083	571.503	540.164	383.636	460.66	452.523
ENSMUSG00000008450.8	Nutf2	chr8	105860580	105879330	18750	-0.0517934	0.0799657	-0.647695	0.517182	0.791154	-0.0186362	0.0802655	-0.232182	0.816396	0.988667	1436.77	1472.93	1493.07	1463.25	1431.53	1433.16	1563.78	1493.51	1500.14	1281.55	1471.88	1315.93	1618.46	1477.91	1559.99
ENSMUSG00000008461.6	Fut1	chr7	45617289	45621059	3770	-0.0223357	0.0830716	-0.268872	0.788028	NA	-0.0470459	0.0817358	-0.575585	0.564896	NA	1.90361	1.36181	2.33199	3.10449	0	0	2.34274	3.52658	0	4.08788	0	0.957738	0.922202	4.74907	2.69895
ENSMUSG00000008475.13	Arpc5	chr1	152766542	152775597	9055	0.0719836	0.103903	0.692793	0.488439	0.773529	0.0865605	0.104046	0.831946	0.405439	0.905128	2037.86	2061.39	1926.86	2164.86	1766.09	2008.17	2306.43	1976.65	2203.64	1892.69	2078.45	1543.87	2212.36	1940.47	2010.71
ENSMUSG00000008482.8	Rnf151	chr17	24715839	24718057	2218	0.45272	0.164515	2.75184	0.0059261	NA	0.169662	0.163388	1.0384	0.299085	NA	22.6436	14.4647	10.7098	20.6966	21.4461	7.51655	8.19959	25.5677	23.0654	16.3515	25.5897	7.6619	13.833	12.3476	8.99649
ENSMUSG00000008489.18	Elavl2	chr4	91250763	91400785	150022	-0.0169304	0.122633	-0.138057	0.890195	0.965072	0.16707	0.122637	1.36232	0.173098	0.747788	15814.1	18409.5	16037.1	16325.5	23707.6	19085.8	14519.1	14816	16671.9	18290.2	13478.2	18491	15673.7	15554.2	14429.5
ENSMUSG00000008496.19	Pou2f2	chr7	25087344	25179726	92382	-0.167739	0.104724	-1.60173	0.109215	0.397767	-0.0266967	0.104779	-0.25479	0.798885	0.988088	2524.24	2817.58	2877.05	2846.82	3168.67	3030.42	2224.43	2592.03	2407.68	2638.73	2458.5	3196.93	2470.58	3154.33	2686.35
ENSMUSG00000008540.11	Mgst1	chr6	138140316	138156755	16439	0.100594	0.102861	0.977959	0.328094	0.653835	0.0280913	0.102816	0.273219	0.784685	0.985445	172.343	112.227	90.345	36.219	21.4461	180.397	210.847	245.097	309.609	66.428	68.2391	34.4786	264.672	19.9461	42.2835
ENSMUSG00000008575.17	Nfib	chr4	82290173	82705750	415577	-0.26573	0.151448	-1.75459	0.0793288	0.337126	0.0386815	0.151448	0.255411	0.798406	0.988039	15522.9	20924	20153.3	20253.7	21808.6	24878.5	16755.3	14513.6	20249.7	17889.6	9438.8	22036.6	25468.4	19234.7	13873.5
ENSMUSG00000008590.4	Htr3b	chr9	48935008	48964990	29982	-0.0654119	0.123976	-0.527619	0.597764	NA	-0.0340059	0.122441	-0.277734	0.781217	NA	3.71931	4.32048	4.90372	1.03483	4.28923	3.75828	8.19959	1.76329	4.43566	2.04394	6.63436	5.74643	0.922202	6.6487	6.29754
ENSMUSG00000008601.12	Rab25	chr3	88542029	88548300	6271	-0.049746	0.157661	-0.315525	0.752363	NA	-0.20428	0.156111	-1.30855	0.190687	NA	13.4307	9.51548	14.7705	8.27864	4.28923	13.7803	11.7137	7.9348	20.404	10.2197	15.1642	11.4929	16.5996	7.59852	23.3909
ENSMUSG00000008604.11	Ubqln4	chr3	88553758	88569725	15967	0.0136164	0.0674291	0.201936	0.839966	0.945095	0.0582226	0.0677219	0.859731	0.389937	0.896894	1796.9	1856.14	1779.24	1946.52	1727.49	1890.41	1860.13	1760.64	1802.65	1710.78	1913.54	1629.11	1816.74	1833.14	1837.98
ENSMUSG00000008658.15	Rbfox1	chr16	6809222	7412479	603257	-0.0305403	0.101955	-0.299548	0.764522	0.914999	0.0791397	0.101955	0.776222	0.437618	0.914996	684542	745182	700919	720842	796583	813768	649536	706276	657881	781450	592561	769007	629901	626255	778513
ENSMUSG00000008668.14	Rps18	chr17	33951999	33956001	4002	0.161274	0.102319	1.57619	0.114981	0.407666	-0.00360296	0.10341	-0.0348415	0.972206	0.998383	490.732	432.155	433.223	441.872	386.03	449.74	450.977	459.337	551.796	473.172	478.622	409.912	523.811	414.119	385.05
ENSMUSG00000008682.13	Rpl10	chrX	74270812	74273135	2323	0.0199534	0.10799	0.184771	0.853408	0.950553	-0.14224	0.108756	-1.30788	0.190913	0.762727	615.469	542.008	605.789	532.937	429.995	591.302	613.798	625.086	613.008	629.533	594.249	492.277	650.152	657.272	623.457
ENSMUSG00000008683.16	Rps15a	chr7	118104372	118116188	11816	0.101131	0.0792103	1.27674	0.201694	0.53103	-0.174558	0.0800245	-2.18131	0.0291604	0.368112	1362.93	1112.57	1265.07	1079.33	995.1	1158.8	1217.05	1321.58	1444.25	1356.15	1329.72	1151.2	1341.8	1339.24	1228.02
ENSMUSG00000008690.15	Ncaph2	chr15	89355719	89372826	17107	-0.00136526	0.0733898	-0.0186028	0.985158	0.994556	0.0214197	0.0738074	0.290211	0.771655	0.984875	1228.86	1249.29	1230.26	1329.76	1167.74	1135	1364.65	1244	1231.34	1169.13	1270.95	1201	1291.08	1224.31	1204.63
ENSMUSG00000008730.17	Hipk1	chr3	103739815	103791563	51748	-0.0379252	0.063617	-0.596148	0.551077	0.812376	-0.00516398	0.0637083	-0.0810566	0.935397	0.996145	6606.59	6764.84	6789.57	6693.28	6338.4	6697.25	7330.43	6842.44	6328.8	6522.21	6732.93	6358.42	7185.8	6960.24	6653.8
ENSMUSG00000008734.9	Gprc5b	chr7	118972047	118995211	23164	0.0392941	0.136443	0.287989	0.773355	0.919444	0.389941	0.136379	2.85924	0.00424654	0.130532	482.305	655.781	465.768	554.669	921.111	513.631	633.711	483.141	540.263	492.59	413.226	372.56	490.611	467.309	532.592
ENSMUSG00000020317.14	Theg	chr10	79576379	79587331	10952	0.541214	0.143429	3.77341	0.000161034	0.00627474	0.5945	0.144254	4.12121	3.76884e-05	0.00515122	103.32	108.805	62.5793	125.214	89.0014	120.265	100.738	94.3359	127.747	87.8894	103.306	72.7881	71.0095	57.9387	48.581
ENSMUSG00000008789.10	Ceacam5	chr7	17713238	17761132	47894	-0.0622205	0.150151	-0.414386	0.678592	NA	-0.0774587	0.148576	-0.52134	0.60213	NA	7.61413	7.30547	8.8917	8.27864	8.57845	10.0221	2.34274	10.5797	7.98419	7.15379	4.73883	7.6619	4.61101	15.197	8.09684
ENSMUSG00000008822.15	Acyp1	chr12	85272398	85288438	16040	0.16053	0.081277	1.97509	0.0482574	0.26049	0.0962615	0.0819913	1.17405	0.240377	0.809503	851.506	811.874	756.524	873.396	772.061	769.194	832.844	833.154	899.552	803.268	870.049	796.838	767.272	801.643	660.342
ENSMUSG00000020912.4	Krt12	chr11	99415666	99422259	6593	0.920247	0.152012	6.05378	1.41485e-09	3.29689e-07	0.682657	0.152054	4.48957	7.13679e-06	0.00134867	3699.54	2944.68	1485.98	1698.16	3635.12	2947.74	3497.71	3672.93	3597.32	3573.83	3954.08	1082.24	1970.75	1165.42	1725.53
ENSMUSG00000008855.17	Hdac5	chr11	102194432	102230166	35734	-0.112013	0.0770483	-1.45381	0.146	0.456998	0.0471663	0.0771021	0.611739	0.540711	0.949693	3929.74	4417.02	4266.57	4322.48	4803.93	4399.69	4141.96	3985.91	3842.17	4069.48	3821.39	3702.62	4699.54	4318.81	4345.3
ENSMUSG00000008859.8	Rala	chr13	17880571	17944239	63668	-0.235119	0.0735865	-3.19514	0.00139762	0.0297405	-0.0631298	0.0736308	-0.857384	0.391233	0.897549	4537.76	5145.59	5388.07	5085.15	5259.66	5693.79	4543.74	4571.33	4270.65	4739.9	4569.18	5526.15	5027.84	5554.52	5443.77
ENSMUSG00000008874.3	Clec3a	chr8	114418086	114425846	7760	0.0889853	0.0944894	0.941749	0.346321	NA	0.0213219	0.0920129	0.231728	0.81675	NA	2.31008	1.42566	1.16656	1.03483	1.07231	1.25276	2.34274	3.52658	1.77426	2.04394	1.89553	0	2.76661	1.89963	0
ENSMUSG00000008892.12	Vdac3	chr8	22577075	22593813	16738	0.0636353	0.0656417	0.969435	0.332328	0.65698	0.0389625	0.0661237	0.589237	0.555702	0.952313	1504.39	1479.02	1437.16	1423.93	1377.91	1525.86	1588.38	1524.36	1549.82	1404.19	1539.17	1460.55	1444.17	1381.98	1461.93
ENSMUSG00000008932.9	Slc1a7	chr4	107968332	108013532	45200	-0.125678	0.154386	-0.814051	0.415616	NA	0.00326056	0.154059	0.0211643	0.983115	NA	16.5165	22.3291	21.9314	18.6269	12.8677	42.5938	15.2278	7.05316	21.2912	23.5053	14.2165	17.2393	33.1993	7.59852	29.6884
ENSMUSG00000008958.14	Vps72	chr3	95111022	95123051	12029	0.0571182	0.104756	0.545252	0.58558	0.830315	0.00688051	0.105417	0.0652697	0.947959	0.99752	546.532	525.749	522.759	588.818	408.549	538.686	566.943	544.856	531.392	496.677	613.204	528.671	518.277	486.305	557.782
ENSMUSG00000008976.16	Gabpa	chr16	84834925	84863779	28854	-0.0146773	0.0798072	-0.18391	0.854084	0.95089	0.00149721	0.0799637	0.0187237	0.985062	0.998383	2983.41	3019.15	3015.68	3033.09	2799.79	2817.45	3426.26	2979.96	2734.14	2941.23	3278.32	2954.62	2913.24	2995.71	3199.15
ENSMUSG00000020155.2	Kcnmb1	chr11	33963013	33973641	10628	0.62917	0.165863	3.79331	0.000148654	0.00584069	0.307955	0.166165	1.85331	0.0638386	0.516132	82.7424	56.5142	37.3116	53.8112	69.6999	63.8907	38.6552	96.0992	115.327	40.8788	78.6645	27.7744	33.1993	36.093	52.1796
ENSMUSG00000009013.5	Dynll1	chr5	115297110	115300999	3889	0.116755	0.0927617	1.25866	0.208153	0.538634	0.0410107	0.0935579	0.438346	0.661136	0.971647	631.227	596.523	577.864	629.177	505.056	643.918	607.941	641.837	645.832	606.028	631.212	499.939	640.008	599.333	572.177
ENSMUSG00000009030.14	Pdcl	chr2	37350074	37359332	9258	0.117974	0.10249	1.15108	0.249699	0.583278	-0.0490485	0.10467	-0.4686	0.639355	0.970284	241.904	212.731	221.175	202.827	218.751	207.958	221.389	256.559	250.171	212.57	248.315	231.773	240.695	225.106	187.127
ENSMUSG00000009035.13	Tmem184b	chr15	79360684	79403303	42619	0.119838	0.0840035	1.42659	0.153699	0.467117	0.012258	0.0842033	0.145576	0.884256	0.993123	3326.84	3071.09	3043.57	3006.18	3447.47	3095.57	2735.15	3520.41	3326.74	2940.21	3520	3054.23	2811.79	3235.07	3073.2
ENSMUSG00000009070.14	Rsph14	chr10	74957477	75032586	75109	-0.0504118	0.0939446	-0.536612	0.591536	0.833237	0.00721529	0.0940365	0.0767286	0.938839	0.996145	3177.75	3319.52	3301.75	3355.95	3732.7	3406.25	2783.17	3301.76	3020.68	3297.9	3090.66	3236.2	3612.26	3522.86	2835.69
ENSMUSG00000009073.16	Nf2	chr11	4765845	4849536	83691	0.144528	0.0724904	1.99375	0.0461789	0.253701	-0.0240824	0.0726744	-0.331374	0.740362	0.984095	5377.33	4754.83	4839.5	4745.73	5063.43	4826.88	4383.27	5504.11	5271.34	5279.5	5454.39	4995.56	4215.38	5108.1	5038.93
ENSMUSG00000020160.18	Meis1	chr11	18879817	19018985	139168	0.434493	0.0970682	4.47616	7.59972e-06	0.000546971	0.233521	0.0971493	2.40374	0.0162285	0.27297	8228.76	7057.68	5902.49	6650.85	6631.14	6143.53	8805.19	8534.32	7618.69	8195.18	8566.85	5643.95	6211.03	5573.51	6181.49
ENSMUSG00000009076.10	Zmat5	chr11	4704678	4737669	32991	0.159696	0.0895196	1.78393	0.0744358	0.325804	0.121099	0.0901091	1.34392	0.178975	0.754362	805.252	781.893	714.173	798.889	798.868	685.259	844.557	827.864	738.981	761.368	892.795	759.486	639.086	711.411	746.708
ENSMUSG00000009079.16	Ewsr1	chr11	5069689	5099266	29577	0.0254922	0.0871881	0.292382	0.769994	0.9177	-0.0503348	0.0872206	-0.577097	0.563874	0.953707	17453.5	16490.6	17123.7	17448.3	14599.5	15054.4	18860.2	17505.9	17763	16510.9	18034.1	15939.6	17138.2	16325.4	19091.4
ENSMUSG00000009090.17	Ap1b1	chr11	4986824	5042791	55967	-0.0981926	0.0629567	-1.55968	0.118835	0.414128	0.0653677	0.062995	1.03766	0.299426	0.851562	7077.54	7961.69	7596.02	7743.63	8679.25	7939.98	7483.88	7311.48	7151.17	7175.25	6672.27	7801.73	7171.04	7534.88	7876.42
ENSMUSG00000009092.5	Derl3	chr10	75893413	75895941	2528	0.246257	0.156492	1.57361	0.115579	0.408982	-0.177511	0.157653	-1.12596	0.260183	0.821812	132.933	85.2253	103.317	96.2392	79.3507	56.3741	108.937	96.0992	109.117	150.23	176.284	87.1542	133.719	99.7305	92.6638
ENSMUSG00000009093.7	Gstt4	chr10	75814943	75822543	7600	0.018757	0.0580626	0.323047	0.74666	NA	0.0307484	0.057358	0.536078	0.591904	NA	1.1048	1.43008	0.674737	1.03483	0	0	4.68548	2.64493	1.77426	0	0	0	0	0	2.69895
ENSMUSG00000009097.9	Tbx1	chr16	18581713	18586969	5256	0.0853059	0.0633979	1.34556	0.178443	NA	0.0817394	0.0622699	1.31266	0.189296	NA	1.39133	1.33704	0	3.10449	1.07231	0	1.17137	0	1.77426	0	3.79106	0	0	0	0
ENSMUSG00000009108.15	Gnat2	chr3	108092789	108101432	8643	0.075856	0.152812	0.496402	0.619611	0.847182	-0.0980527	0.154618	-0.63416	0.525976	0.947709	60.1689	50.6349	55.8878	45.5325	53.6153	58.8797	44.512	54.662	61.2121	48.0326	76.769	63.2107	40.5769	53.1896	66.574
ENSMUSG00000009112.4	Bcl2l13	chr6	120836212	120892842	56630	-0.0563086	0.0558897	-1.0075	0.313696	0.64131	-0.0530682	0.05622	-0.943938	0.345201	0.876787	2432.27	2438.61	2531.76	2256.96	2492.04	2526.81	2478.62	2382.2	2452.92	2449.66	2444.29	2498.74	2623.66	2433.42	2571.2
ENSMUSG00000009114.17	2610028H24Rik	chr10	76449081	76461110	12029	0.361878	0.162303	2.22964	0.0257712	0.184874	0.125056	0.163566	0.76456	0.444534	NA	42.872	33.0266	28.3912	32.0797	21.4461	37.5828	40.9979	37.9107	32.8239	56.2083	44.545	25.8589	34.1215	26.5948	26.9895
ENSMUSG00000009115.5	Spatc1l	chr10	76562272	76570201	7929	0.0192197	0.123085	0.15615	0.875914	NA	0.0641922	0.121201	0.529632	0.596367	NA	3.07728	3.76612	2.79507	2.06966	3.21692	6.26379	3.51411	0.881644	3.54853	4.08788	3.79106	1.91548	2.76661	3.79926	2.69895
ENSMUSG00000009145.6	Dqx1	chr6	83057844	83067318	9474	0.191277	0.166304	1.15016	0.250078	NA	0.105981	0.165936	0.638683	0.523029	NA	21.2116	18.8209	15.9287	17.5921	23.5907	20.0441	14.0564	20.2778	28.3882	15.3295	20.8508	9.57738	16.5996	12.3476	25.1902
ENSMUSG00000009207.15	Lnpk	chr2	74520291	74579435	59144	-0.133555	0.070527	-1.89367	0.0582685	0.287977	-0.0725675	0.0706085	-1.02774	0.30407	0.853266	5611.6	5867.01	6184.27	5536.34	5662.85	6381.55	5887.3	5643.41	5744.18	5720.99	5337.82	6776	6261.75	6069.31	5630
ENSMUSG00000009210.10	Prr29	chr11	106365472	106377558	12086	0.0179278	0.107673	0.166502	0.867762	NA	0.182064	0.10679	1.70488	0.0882162	NA	1.59723	3.88012	1.38908	4.13932	5.36153	2.50552	3.51411	2.64493	1.77426	1.02197	0.947766	0.957738	0	1.89963	2.69895
ENSMUSG00000009214.9	Mymk	chr2	27061636	27072179	10543	0.0368943	0.121031	0.304832	0.760494	NA	-0.0194208	0.119371	-0.162692	0.870761	NA	5.76455	4.3634	4.86667	7.24381	5.36153	2.50552	2.34274	5.28987	2.6614	12.2636	2.8433	5.74643	9.22202	0	4.49824
ENSMUSG00000009216.7	Fam163b	chr2	27110380	27142491	32111	-0.0566915	0.0804272	-0.70488	0.480885	0.768615	-0.213324	0.0808158	-2.63963	0.00829966	0.191068	2096.27	1867.39	2185.69	1718.85	1878.68	2083.34	1788.68	2102.72	2091.86	2238.11	1952.4	2110.85	2451.21	2078.19	2102.48
ENSMUSG00000009246.14	Trpm5	chr7	143069153	143094642	25489	0.104161	0.130313	0.799316	0.424107	0.731551	-0.125756	0.132847	-0.946624	0.34383	0.876289	123.849	101.657	113.108	88.9954	100.797	110.243	106.595	110.206	126.86	137.966	120.366	85.2387	135.564	110.178	121.453
ENSMUSG00000009248.6	Ascl2	chr7	142966829	142969264	2435	-0.0470203	0.0900654	-0.522068	0.601623	NA	0.0822983	0.089215	0.922471	0.356283	NA	0.90229	3.02797	1.64177	6.20898	2.14461	3.75828	0	0	2.6614	0	0.947766	2.87321	1.8444	0.949815	0.899649
ENSMUSG00000009281.6	Rarres2	chr6	48569696	48572789	3093	0.183704	0.150469	1.22088	0.222133	0.555712	0.14937	0.151384	0.986694	0.323793	0.86223	93.226	90.0426	77.8341	96.2392	75.0615	76.4183	112.451	71.4132	77.1805	100.153	124.157	66.0839	82.9982	91.1822	71.0723
ENSMUSG00000009291.13	Pttg1ip	chr10	77581720	77598732	17012	0.0871345	0.112563	0.774093	0.438876	0.742305	0.0418768	0.112621	0.371839	0.710013	0.97885	5278.85	5091.76	4924.4	5530.13	4233.47	4474.85	6128.61	5495.29	4961.73	4605	6053.38	4558.83	4582.42	4971.33	5585.02
ENSMUSG00000009292.18	Trpm2	chr10	77907722	77970563	62841	0.169222	0.0665921	2.54117	0.0110482	0.111836	0.183742	0.0667782	2.75153	0.00593175	0.158755	3297.2	3331.11	2917.24	3518.42	3459.26	3195.79	3150.98	3434.89	3059.72	3369.43	3324.76	2856.93	2749.08	3121.09	2941.85
ENSMUSG00000009293.17	Ube2g2	chr10	77622275	77645993	23718	0.0357672	0.092758	0.385597	0.699795	0.885847	-0.0276486	0.0930555	-0.297119	0.766375	0.984462	1631.34	1555.36	1587.92	1531.55	1366.12	1505.82	1817.97	1681.3	1619.9	1433.82	1790.33	1458.64	1603.71	1605.19	1684.14
ENSMUSG00000009350.13	Mpo	chr11	87793581	87804413	10832	0.00329353	0.0958943	0.0343454	0.972602	NA	-0.0576752	0.0947337	-0.608814	0.542648	NA	4.33644	2.60078	4.28113	4.13932	0	6.26379	0	3.52658	7.98419	2.04394	3.79106	6.70417	0.922202	9.49815	0
ENSMUSG00000009356.12	Lpo	chr11	87806428	87828289	21861	0.0722212	0.160948	0.448723	0.653631	NA	-0.0971003	0.159919	-0.607186	0.543727	NA	20.9563	15.2257	18.4658	16.5573	3.21692	20.0441	21.0847	21.1595	23.0654	10.2197	29.3807	22.9857	11.9886	20.8959	17.993
ENSMUSG00000009376.15	Met	chr6	17463800	17573980	110180	-0.0973504	0.130775	-0.744411	0.456628	0.753738	-0.0219939	0.130741	-0.168226	0.866406	0.992237	149.868	200.405	216.031	188.339	221.967	325.717	65.5967	139.3	248.397	162.493	49.2838	349.574	146.63	322.937	44.9824
ENSMUSG00000009378.3	Slc16a12	chr19	34668403	34747289	78886	-0.104346	0.119619	-0.872317	0.383035	0.700718	0.24063	0.119374	2.01576	0.0438248	0.438087	188.433	250.34	205.389	205.931	269.149	275.607	250.673	216.003	172.991	167.603	197.135	207.829	178.907	192.812	242.006
ENSMUSG00000009394.13	Syn2	chr6	115134902	115282006	147104	-0.164658	0.0867209	-1.89871	0.0576026	0.286189	-0.163882	0.0867352	-1.88945	0.0588315	0.498645	30341.4	30358.5	34315.8	29316.7	33775.5	31525.7	26816.2	30715.6	28020.1	33005.5	29624.3	37032.9	30044.4	34914.2	35271.6
ENSMUSG00000009406.13	Elk1	chrX	20933395	20950608	17213	-0.00412224	0.0722218	-0.0570775	0.954483	0.984692	-0.0113746	0.0724166	-0.157072	0.875188	0.992567	3060.57	3043.25	3069.21	3261.78	3056.07	2768.6	3086.56	2915.6	2909.79	3166.06	3250.84	2811.92	3123.5	3096.4	3245.03
ENSMUSG00000009418.15	Nav1	chr1	135434580	135607295	172715	-0.0333989	0.0964044	-0.346445	0.729008	0.899555	-0.0559286	0.0964287	-0.579999	0.561915	0.953707	16165.2	15888.8	16582.4	15671.5	19344.4	15740.9	12798.4	15997.4	15759.9	17409.3	15494.1	16357.2	16108.1	17131.8	16732.6
ENSMUSG00000009470.17	Tnpo1	chr13	98839019	98926384	87365	-0.0264039	0.0576458	-0.458038	0.646925	0.861548	-0.0151303	0.0576961	-0.262242	0.793135	0.987931	14963	15085	15248.8	14879.8	14572.6	15881.2	15006.4	15217.2	15058.2	14639.7	14936.8	16379.2	14448.1	15719.4	14448.4
ENSMUSG00000009471.4	Myod1	chr7	46376474	46379099	2625	-0.100014	0.085747	-1.16639	0.243458	NA	-0.0562278	0.0844929	-0.665473	0.505748	NA	0.918098	1.58035	2.5992	3.10449	3.21692	0	0	1.76329	0.887132	1.02197	0	3.83095	2.76661	3.79926	0
ENSMUSG00000009487.10	Otog	chr7	46240987	46311434	70447	0.12723	0.162519	0.782861	0.433709	NA	0.338557	0.162403	2.08468	0.0370987	NA	19.4731	27.7331	15.2953	48.637	23.5907	18.7914	19.9133	16.7512	23.0654	15.3295	22.7464	19.1548	13.833	22.7955	5.39789
ENSMUSG00000009535.13	Rnmt	chr18	68300355	68324852	24497	-0.142142	0.0828598	-1.71545	0.0862629	0.352649	0.0304753	0.0829325	0.367471	0.713267	0.979199	2282.79	2595.66	2537.07	2541.54	2310.82	2581.94	2948.34	2300.21	2382.84	2144.09	2304.02	2355.08	2812.72	2555.95	2424.55
ENSMUSG00000009545.14	Kcnq1	chr7	143106362	143427042	320680	-0.0571723	0.0743578	-0.768882	0.441964	0.744886	-0.0574019	0.0743777	-0.771762	0.440255	0.91633	27987	27982	29182.1	27010.1	30078.2	29258.2	25581.5	28947	27010.5	30716.3	25274.1	30493.4	28521.9	29000.7	28712.3
ENSMUSG00000009549.14	Srp14	chr2	118475850	118479711	3861	0.0519953	0.0924778	0.562246	0.573948	0.825059	0.0195748	0.0934919	0.209375	0.834156	0.991148	427.799	417.189	411.311	461.534	374.235	380.839	452.149	418.781	432.92	415.942	443.554	377.349	451.879	426.467	389.548
ENSMUSG00000009551.2	6330409D20Rik	chr2	32732620	32741016	8396	0.29468	0.147648	1.99583	0.0459519	0.253037	0.286597	0.148671	1.92773	0.0538887	0.481196	87.8857	87.2913	66.4079	88.9954	101.869	92.7041	65.5967	68.7683	111.779	83.8015	87.1944	55.5488	75.6205	75.9852	58.4772
ENSMUSG00000009555.16	Cdk9	chr2	32705784	32713076	7292	0.0448872	0.0909742	0.493406	0.621726	0.848171	0.0183008	0.0912525	0.200552	0.841049	0.991148	1589.87	1558.06	1537.04	1773.7	1358.61	1395.57	1704.34	1518.19	1689.1	1500.25	1651.96	1427.99	1536.39	1616.58	1567.19
ENSMUSG00000009563.16	Tor2a	chr2	32757234	32762244	5010	-0.0120186	0.0920324	-0.130591	0.896099	0.966353	-0.0841649	0.0935939	-0.899256	0.368517	0.887545	318.2	301.445	320.979	286.648	275.583	295.651	347.897	295.351	319.367	317.833	340.248	333.293	326.459	302.991	321.175
ENSMUSG00000009566.12	Fpgs	chr2	32682609	32704145	21536	0.181028	0.114113	1.58639	0.112652	0.40387	0.070602	0.115279	0.612443	0.540245	0.949693	305.089	279.298	264.083	290.787	282.017	301.915	242.474	281.245	322.916	289.217	326.979	311.265	272.05	268.798	204.22
ENSMUSG00000009569.14	Mkl2	chr16	13256481	13417529	161048	-0.15287	0.0548867	-2.78519	0.00534961	0.0711908	-0.0993936	0.0548977	-1.81052	0.0702149	0.53644	60018.7	62351	66929.7	62519.2	60475.9	63472.3	62936.5	59745.5	57495.9	65096.4	57736.9	68034.8	63928.9	67056.9	68698.1
ENSMUSG00000009575.14	Cbx5	chr15	103191544	103239816	48272	0.0224023	0.0655846	0.341578	0.732668	0.901425	-0.124091	0.0658215	-1.88526	0.0593941	0.501576	4518.1	4065.18	4445.66	3895.1	3807.76	4234.32	4323.53	4470.82	4395.74	4336.22	4869.62	4424.75	4698.62	4414.74	4244.54
ENSMUSG00000009585.17	Apobec3	chr15	79891659	79915906	24247	0.0580847	0.163659	0.354913	0.722655	0.896293	-0.0621638	0.164084	-0.378854	0.704796	0.977646	72.2741	62.7934	67.5657	67.2639	46.1092	47.6048	90.1955	69.6499	74.5191	51.0985	93.8288	52.6756	61.7875	54.1394	101.66
ENSMUSG00000009588.9	St6galnac1	chr11	116765025	116775507	10482	0.0340751	0.138231	0.246509	0.805288	NA	0.0650583	0.137117	0.474474	0.635162	NA	7.82834	8.63274	7.05244	6.20898	13.94	5.01103	9.37096	3.52658	15.9684	6.13182	5.68659	15.3238	3.68881	3.79926	5.39789
ENSMUSG00000009596.9	Taf7l	chrX	134460118	134476490	16372	-0.0990107	0.100703	-0.983194	0.325512	0.652045	0.0383168	0.100952	0.379555	0.704276	0.977602	628.314	698.41	678.18	716.102	729.168	759.172	589.199	581.885	628.089	654.061	649.219	802.584	586.52	668.669	654.944
ENSMUSG00000009614.16	Sardh	chr2	27188393	27248337	59944	0.0482156	0.157116	0.306878	0.758936	0.912083	-0.314518	0.159193	-1.97571	0.0481878	0.456454	57.294	38.7097	54.5708	27.9404	49.3261	40.0883	37.4838	49.3721	55.0022	48.0326	76.769	67.9994	44.2657	48.4405	57.5775
ENSMUSG00000009621.18	Vav2	chr2	27262104	27427033	164929	0.514624	0.102191	5.03591	NA	NA	0.313202	0.102666	3.0507	NA	NA	1266	1083.35	849.833	979.984	1372.55	974.646	1006.21	1215.79	1396.35	1214.1	1237.78	800.669	829.982	885.227	883.455
ENSMUSG00000009628.14	Tex15	chr8	33516738	33585582	68844	0.0243728	0.110567	0.220435	0.825532	0.939447	0.00793786	0.11214	0.0707855	0.943568	0.997113	176.077	173.905	172.722	155.224	195.16	175.386	169.849	193.962	164.119	173.735	172.493	149.407	167.841	192.812	180.829
ENSMUSG00000009630.10	Ppp2cb	chr8	33599625	33619441	19816	0.0157609	0.0703856	0.223923	0.822817	0.9385	-0.0178146	0.0709493	-0.25109	0.801745	0.988088	1204.8	1175.74	1190.5	1161.08	1076.6	1201.4	1263.91	1137.32	1192.31	1315.28	1174.28	1178.02	1173.04	1190.12	1220.82
ENSMUSG00000009633.3	G0s2	chr1	193272161	193273217	1056	0.664078	0.14588	4.55223	5.30808e-06	NA	0.159193	0.140956	1.12938	0.258739	NA	12.9085	3.89391	1.8716	3.10449	5.36153	1.25276	5.85685	12.343	8.87132	14.3076	16.112	1.91548	0.922202	2.84944	1.7993
ENSMUSG00000009640.11	Dmap1	chr4	117674681	117682273	7592	0.148411	0.0864167	1.71739	0.0859082	0.352035	0.0292758	0.0873724	0.335069	0.737573	0.984095	679.593	621.423	608.423	685.057	596.202	544.95	659.481	711.487	707.931	633.621	665.331	572.727	651.074	576.537	633.353
ENSMUSG00000009646.13	Pla2g12b	chr10	59403660	59421976	18316	-0.0350497	0.118555	-0.295641	0.767504	NA	0.155888	0.117917	1.32202	0.186162	NA	2.05321	4.93972	2.55564	8.27864	4.28923	2.50552	4.68548	4.40822	0.887132	1.02197	1.89553	0.957738	2.76661	3.79926	2.69895
ENSMUSG00000009647.13	Mcu	chr10	59446984	59616692	169708	-0.207303	0.0794882	-2.60798	0.00910785	0.0999081	-0.0341321	0.0794988	-0.429341	0.667675	0.973277	16679.9	18952.9	19435.8	19381.3	18258.2	18958	19214	16466.5	15005.8	18483.3	16764.1	18292.8	18501.2	18715.1	22233.9
ENSMUSG00000009654.4	Oit3	chr10	59422958	59441778	18820	-0.103026	0.132608	-0.77692	0.437206	NA	-0.015831	0.131632	-0.120267	0.904272	NA	4.99742	6.80301	7.22795	13.4528	3.21692	0	10.5423	3.52658	3.54853	8.17576	4.73883	4.78869	7.37761	10.448	6.29754
ENSMUSG00000009670.11	Tex11	chrX	100838648	101059667	221019	-0.155191	0.158506	-0.979084	0.327539	0.653162	-0.368507	0.159615	-2.30873	0.0209585	0.311834	69.0211	54.5562	81.0146	48.637	50.3984	67.649	51.5403	59.9518	55.0022	65.4061	95.7243	91.9429	50.7211	78.8346	102.56
ENSMUSG00000009681.10	Bcr	chr10	75060592	75184921	124329	-0.0242822	0.097582	-0.248839	0.803486	0.93123	-0.0114974	0.0975918	-0.117811	0.906218	0.994941	34024.5	34359.1	34662.7	35634.4	31110.8	33684.2	37007.1	34997.8	28640.2	32914.6	39545.5	33155.9	31744	34054.6	39696.1
ENSMUSG00000020227.10	Irak3	chr10	120141648	120202130	60482	0.611808	0.107829	5.67386	1.39617e-08	2.434e-06	0.241408	0.109713	2.20036	0.0277812	0.361739	405.579	303.895	250.681	252.498	318.475	311.937	332.669	412.61	375.257	384.261	450.189	242.308	213.029	263.099	284.289
ENSMUSG00000009731.4	Kcnd1	chrX	7822289	7838280	15991	-0.284214	0.0937425	-3.03185	0.00243056	0.0429777	-0.138009	0.0939779	-1.46853	0.14196	0.697828	711.45	794.409	882.521	894.093	797.796	764.183	721.564	682.393	640.509	676.544	846.355	848.556	862.259	923.22	896.05
ENSMUSG00000009733.8	Tfcp2	chr15	100502799	100552008	49209	-0.129181	0.0820826	-1.57379	0.115536	0.408892	-0.0269349	0.0821727	-0.327784	0.743075	0.984462	3211.17	3463.96	3533.68	3315.6	3748.78	3658.06	3133.41	3408.44	2923.1	3342.86	3170.28	3652.81	3139.17	3573.2	3769.53
ENSMUSG00000009734.18	Pou6f2	chr13	18121098	18397686	276588	-0.250672	0.111105	-2.25617	0.0240602	0.177177	0.0272442	0.111105	0.245211	0.806293	0.988233	7780.19	9702.87	9495.01	9262.76	9842.7	11053.1	8652.91	7979.76	7901.68	9204.88	6034.42	8282.52	10580.4	9888.52	9228.6
ENSMUSG00000009739.16	Pou6f1	chr15	100575318	100599984	24666	-0.013923	0.0583264	-0.238708	0.811332	0.934322	0.101038	0.0584761	1.72784	0.0840162	0.575122	2901.72	3150.76	2930.24	3221.43	2959.57	3291	3131.07	2785.11	2931.97	2994.37	2895.42	2848.31	3031.28	2792.45	3048.91
ENSMUSG00000009741.15	Ubp1	chr9	113930934	113977202	46268	-0.0537841	0.0457568	-1.17543	0.239822	0.573473	-0.00783272	0.0458267	-0.17092	0.864286	0.992237	12218.2	12621.3	12691.4	13100.9	11908	12446.2	13030.3	12168.5	12264.6	12358.7	12081.2	12705.4	12850.9	12492.9	12716.5
ENSMUSG00000009772.15	Nuak2	chr1	132316126	132333488	17362	0.229314	0.166585	1.37656	0.168648	0.486748	0.0856414	0.166348	0.514832	0.60667	NA	27.1854	22.1983	19.5326	28.9752	15.0123	22.5497	22.256	42.3189	18.6298	31.6811	16.112	16.2815	21.2106	19.9461	20.6919
ENSMUSG00000009828.15	Ick	chr9	78109192	78172107	62915	-0.151149	0.067813	-2.2289	0.0258203	0.185043	-0.0102503	0.0679452	-0.150862	0.880085	0.992567	2235.01	2474.19	2493.12	2414.26	2747.25	2352.68	2382.57	2256.13	2095.41	2406.74	2181.76	2460.43	2495.48	2489.46	2527.11
ENSMUSG00000009863.14	Sdhb	chr4	140961203	140979193	17990	0.0262085	0.0574698	0.45604	0.648362	0.862247	0.00113822	0.0579498	0.0196414	0.984329	0.998383	1798.59	1766.33	1765.65	1809.92	1787.53	1632.34	1835.54	1844.4	1842.57	1718.95	1788.43	1769.9	1789.99	1744.81	1757.91
ENSMUSG00000009876.13	Cox4i2	chr2	152754173	152765037	10864	0.111409	0.166074	0.670836	0.502325	NA	-0.0593979	0.165412	-0.359092	0.719527	NA	18.8294	14.3342	15.9091	14.4876	15.0123	13.7803	14.0564	18.5145	14.1941	25.5492	17.0598	12.4506	18.444	23.7454	8.99649
ENSMUSG00000009894.15	Snap47	chr11	59407134	59451186	44052	-0.0801386	0.062067	-1.29116	0.196647	0.52482	-0.0233257	0.0622011	-0.375006	0.707656	0.978301	4147.17	4319.92	4393.4	4493.23	4221.67	4250.61	4314.15	4389.71	4051.53	4209.49	3937.97	4263.85	4376.77	4776.62	4156.38
ENSMUSG00000009900.7	Wnt3a	chr11	59248033	59290752	42719	0.121303	0.114195	1.06224	0.288125	NA	0.0568576	0.112421	0.505755	0.613029	NA	5.26421	3.94224	2.82569	7.24381	0	5.01103	3.51411	8.81644	4.43566	3.06591	4.73883	6.70417	0	1.89963	2.69895
ENSMUSG00000009905.5	Kdsr	chr1	106720459	106759727	39268	0.137261	0.0761864	1.80165	0.071601	0.318941	0.155306	0.0762866	2.03583	0.0417678	0.426726	4981.68	5048.75	4505.12	5402.85	4621.64	5058.64	5111.86	5349.82	5226.09	4427.17	4923.64	4736.97	4254.12	4693.98	4335.41
ENSMUSG00000009907.17	Vps4b	chr1	106764071	106796728	32657	0.0155385	0.0688765	0.2256	0.821513	0.937961	-0.0302812	0.0690371	-0.438622	0.660936	0.971647	4581.4	4432.27	4530.43	4334.9	4117.66	4352.08	4924.44	4418.8	4953.74	4379.14	4573.92	4721.65	4516.02	4497.37	4386.69
ENSMUSG00000009927.9	Rps25	chr9	44407139	44410427	3288	-0.0265971	0.116086	-0.229115	0.818779	0.93735	-0.0671643	0.117123	-0.573451	0.566339	0.954074	259.033	250.696	264.55	251.464	211.244	235.519	304.556	243.334	276.785	280.02	235.994	223.153	278.505	300.141	256.4
ENSMUSG00000009941.10	Nxf2	chrX	134944526	134964754	20228	-0.136978	0.159235	-0.860226	0.389665	NA	-0.253265	0.157785	-1.60513	0.108465	NA	12.0627	9.17975	15.5796	14.4876	6.43384	8.76931	7.02822	7.05316	20.404	12.2636	8.52989	13.4083	9.22202	18.9963	20.6919
ENSMUSG00000009995.17	Taz	chrX	74281912	74290151	8239	0.0253523	0.0739311	0.342918	0.73166	0.900891	0.0202935	0.0742085	0.273466	0.784495	0.985445	2057.12	2049.82	2019.42	2101.74	1849.73	2025.71	2222.09	1964.3	2082.99	1952.98	2228.2	2022.74	2153.34	1972.76	1928.85
ENSMUSG00000010021.13	Kif19a	chr11	114765388	114790739	25351	0.064041	0.127369	0.5028	0.615105	0.845419	-0.0702266	0.127023	-0.552865	0.580356	NA	44.5748	26.072	35.4083	17.5921	25.7354	18.7914	42.1693	68.7683	16.8555	10.2197	82.4556	18.197	17.5218	29.4443	76.4701
ENSMUSG00000010025.19	Aldh3a2	chr11	61223417	61267464	44047	0.139156	0.084985	1.63741	0.101544	0.383947	0.0480876	0.085418	0.562968	0.573457	0.957244	1428.51	1335.17	1288.13	1380.46	1310.36	1445.68	1204.17	1437.96	1480.62	1312.21	1483.25	1355.2	1431.26	1209.11	1156.95
ENSMUSG00000010044.12	Zmynd10	chr9	107547298	107551319	4021	0.288591	0.140271	2.05739	0.0396492	0.232975	-0.000368326	0.142654	-0.00258196	0.99794	0.999135	110.872	85.4135	85.4578	70.3684	98.6522	78.9238	93.7096	126.075	87.8261	120.592	108.993	65.1262	95.909	84.5335	96.2624
ENSMUSG00000010045.2	Tmem115	chr9	107533945	107538673	4728	0.0530213	0.143648	0.369107	0.712048	0.891376	-0.132848	0.145391	-0.913729	0.360859	0.884026	102.918	86.1242	97.9514	103.483	82.5676	58.8797	99.5664	96.0992	97.5845	117.527	100.463	95.7738	121.731	97.8309	76.4701
ENSMUSG00000010047.12	Hyal2	chr9	107567945	107572779	4834	0.237324	0.159807	1.48507	0.137525	0.444107	0.0500288	0.161109	0.310528	0.75616	0.984462	50.5936	41.2493	39.1825	56.9156	32.1692	32.5717	43.3407	62.5968	44.3566	48.0326	47.3883	29.6899	44.2657	34.1933	48.581
ENSMUSG00000010048.10	Ifrd2	chr9	107587642	107593385	5743	0.175529	0.133775	1.31212	0.18948	0.515719	0.0982407	0.134395	0.730983	0.46479	0.930407	311.373	291.432	267.306	299.066	227.329	266.838	372.496	340.315	309.609	292.283	303.285	206.871	324.615	233.654	304.081
ENSMUSG00000010051.15	Hyal1	chr9	107576927	107581710	4783	0.153088	0.133108	1.1501	0.250103	0.583743	0.14181	0.135013	1.05034	0.293561	0.847412	79.9401	79.0259	69.8684	85.8909	69.6999	72.66	87.8527	77.5847	70.0834	85.8455	86.2467	68.9571	62.7097	73.1357	74.6708
ENSMUSG00000010054.4	Tusc2	chr9	107563255	107566112	2857	-0.0933298	0.130287	-0.716338	0.473782	0.763639	-0.0930582	0.131761	-0.706263	0.480025	0.935156	105.813	105.692	114.496	128.319	89.0014	115.254	90.1955	96.9809	112.666	109.351	104.254	112.055	134.641	99.7305	111.556
ENSMUSG00000010057.8	Nprl2	chr9	107542226	107545706	3480	-0.0324614	0.100659	-0.322488	0.747083	0.90832	0.0181448	0.10151	0.178748	0.858136	0.992076	305.52	317.416	313.074	346.668	280.944	290.64	351.411	294.469	295.415	313.745	318.449	269.124	334.759	336.234	312.178
ENSMUSG00000010064.15	Slc38a3	chr9	107650634	107669530	18896	-0.0767283	0.115956	-0.661703	NA	NA	-0.0767682	0.115897	-0.662381	NA	NA	96.338	96.2814	138.551	82.7864	89.0014	56.3741	156.964	69.6499	55.8893	40.8788	218.934	46.9292	78.3872	29.4443	399.444
ENSMUSG00000010066.15	Cacna2d2	chr9	107399612	107529343	129731	0.0815367	0.0997083	0.817753	0.413498	0.723561	0.062795	0.0997406	0.629583	0.528968	0.947709	11184.1	11023.1	10503.5	10804.7	12963.1	9255.38	11069.4	10754.3	10587	11960.1	11434.8	9769.89	9458.1	10554.3	12231.6
ENSMUSG00000010067.13	Rassf1	chr9	107551555	107562267	10712	0.258961	0.102554	2.52511	0.0115661	0.115437	0.0635194	0.103444	0.614046	0.539185	0.949693	652.083	560.611	533.609	583.644	499.695	532.422	626.683	568.661	781.563	619.314	638.794	487.489	573.61	546.143	527.194
ENSMUSG00000010080.15	Epn3	chr11	94489599	94499974	10375	0.0716456	0.147255	0.486543	0.626583	NA	-0.0401482	0.146039	-0.274914	0.783382	NA	15.2258	11.3091	12.7788	6.20898	25.7354	6.26379	7.02822	11.4614	31.9367	6.13182	11.3732	10.5351	11.9886	13.2974	15.294
ENSMUSG00000010086.17	Rnf112	chr11	61448442	61454131	5689	-0.045769	0.0943635	-0.485028	0.627656	0.850991	0.0622825	0.0944032	0.65975	0.509414	0.942258	5534.37	6007.78	5730.07	6772.96	5198.54	5811.55	6248.09	5194.65	5777.89	5551.34	5613.62	4861.48	6513.51	5622.9	5922.39
ENSMUSG00000010095.13	Slc3a2	chr19	8706882	8723369	16487	0.146975	0.0807546	1.82003	0.0687551	0.313019	0.147055	0.0809406	1.81683	0.0692429	0.533423	2636.75	2637.11	2365.38	2696.77	2656.1	2694.68	2500.87	2475.66	2980.76	2560.03	2530.53	2248.77	2667.01	2364.09	2181.65
ENSMUSG00000010097.13	Nxf1	chr19	8757073	8772475	15402	-0.023194	0.0899084	-0.257973	0.796428	0.928932	0.0121962	0.089993	0.135524	0.892198	0.993536	4161.75	4273.9	4235.07	4577.05	3902.12	3765.79	4850.64	4029.11	4387.75	4042.91	4187.23	3724.64	4537.23	4504.02	4174.37
ENSMUSG00000010110.17	Stx5a	chr19	8741413	8756069	14656	-0.104804	0.0951264	-1.10173	0.270577	0.60271	-0.0582417	0.0951911	-0.611839	0.540644	0.949693	4644.59	4812.21	5029.97	4954.77	4021.15	4543.76	5729.17	4487.57	4423.24	4729.68	4937.86	4679.51	5136.66	4804.16	5499.55
ENSMUSG00000010122.14	Slc47a1	chr11	61343401	61378345	34944	0.0783651	0.103029	0.760612	0.446889	NA	0.189795	0.102397	1.85352	0.0638082	NA	3.78471	6.89979	1.81057	14.4876	1.07231	5.01103	7.02822	0.881644	2.6614	3.06591	8.52989	0	1.8444	0	5.39789
ENSMUSG00000010136.14	Pifo	chr3	105996957	106014646	17689	-0.141214	0.130588	-1.08137	0.279533	0.612494	-0.381273	0.130784	-2.91529	0.00355362	0.116131	1678.85	1366.37	1893.25	1294.57	1103.4	1636.1	1431.41	1782.68	1284.57	1803.78	1844.35	1927.93	1421.11	1927.17	2296.8
ENSMUSG00000010142.12	Tnfrsf13b	chr11	61126755	61149372	22617	0.0672815	0.158961	0.423259	0.672106	NA	-0.0480725	0.157699	-0.304838	0.76049	NA	15.0549	11.9739	13.2247	5.17415	12.8677	8.76931	21.0847	10.5797	19.5169	10.2197	19.9031	15.3238	13.833	6.6487	17.0933
ENSMUSG00000010154.7	Spire2	chr8	123332713	123369515	36802	-0.0698185	0.0701485	-0.995296	0.319593	0.646672	-0.00240934	0.0706202	-0.0341168	0.972784	0.998383	939.061	986.742	987.991	986.193	959.714	1087.39	913.668	947.768	922.617	937.146	948.713	948.161	1012.58	1044.8	946.43
ENSMUSG00000010175.13	Prox1	chr1	190118035	190170714	52679	0.0936785	0.141216	0.66337	0.507094	0.785117	0.326037	0.141234	2.30849	0.0209721	0.311834	934.014	1151.54	857.702	871.327	1746.79	886.953	1101.09	909.857	1031.73	957.586	836.877	744.162	856.725	937.467	892.452
ENSMUSG00000010205.11	Raver1	chr9	21074158	21092008	17850	0.00972322	0.0791153	0.122899	0.902187	0.968014	0.0517505	0.0792275	0.653189	0.513634	0.943081	3769.81	3887.47	3742.45	4088.61	3955.74	3326.07	4179.45	3560.08	3786.28	3956.05	3776.85	3475.63	3910.14	3628.29	3955.76
ENSMUSG00000010277.7	2610507B11Rik	chr11	78261752	78290623	28871	-0.110206	0.0733123	-1.50324	0.132778	0.437114	0.0239505	0.0733443	0.326549	0.744009	0.984462	8716.44	9613.29	9446.86	10168.2	9167.15	8634.01	10483.8	8828.79	8402.03	8613.16	9021.78	8726.91	9473.78	9463	10123.7
ENSMUSG00000010290.7	AI597479	chr1	43098710	43115947	17237	0.0572712	0.0750649	0.762956	0.44549	0.747725	-0.0361964	0.0756701	-0.478345	0.632405	0.968733	1246.4	1164.71	1195.4	1094.85	1095.9	1190.12	1277.96	1247.53	1239.32	1154.83	1343.93	1131.09	1243.13	1242.36	1165.05
ENSMUSG00000010307.7	Tmem86a	chr7	47050601	47054777	4176	0.393907	0.157744	2.49713	0.0125202	0.120863	0.177908	0.158411	1.12308	0.261402	0.822279	139.217	111.74	92.2372	94.1695	91.146	132.792	128.851	119.022	176.539	126.724	134.583	73.7458	124.497	114.928	55.7782
ENSMUSG00000010311.15	Optc	chr1	133897199	133907999	10800	0.121154	0.166708	0.726747	0.467381	0.759141	0.115565	0.166721	0.693167	0.488205	NA	25.5863	25.5177	21.6503	18.6269	24.663	21.2969	37.4838	29.9759	22.1783	25.5492	24.6419	11.4929	25.8217	30.3941	18.8926
ENSMUSG00000010342.16	Tex14	chr11	87405065	87555823	150758	-0.131088	0.13463	-0.973688	0.330212	0.655568	-0.0822487	0.13541	-0.607403	0.543583	0.949981	142.969	148.927	160.484	182.13	157.629	135.298	120.651	154.288	159.684	145.12	112.784	164.731	159.541	189.013	128.65
ENSMUSG00000010358.13	Ifi35	chr11	101448407	101458698	10291	0.0960361	0.164201	0.584868	0.558636	0.816311	-0.0985961	0.164841	-0.598127	0.549755	0.951858	49.552	39.2486	44.4009	38.2887	43.9646	32.5717	42.1693	61.7151	50.5665	34.747	51.1793	41.1827	23.055	51.29	62.0758
ENSMUSG00000010362.9	Rdm1	chr11	101627195	101636100	8905	0.015185	0.16179	0.0938559	0.925224	NA	-0.169975	0.16081	-1.05699	0.290515	NA	22.122	15.3283	21.422	18.6269	15.0123	11.2748	16.3992	15.8696	14.1941	21.4614	36.9629	10.5351	17.5218	18.0465	39.5845
ENSMUSG00000010376.14	Nedd8	chr14	55662265	55671906	9641	-0.0499808	0.0843023	-0.592876	0.553264	0.813664	-0.148349	0.085273	-1.7397	0.0819122	0.570066	652.499	606.52	677.637	613.654	575.829	571.258	665.338	656.825	666.236	585.589	701.347	669.459	692.574	731.357	617.159
ENSMUSG00000010392.8	Gosr1	chr11	76726602	76763579	36977	0.0237552	0.055941	0.424646	0.671094	0.874154	0.0296298	0.0562271	0.526966	0.598217	0.961843	2779.53	2792.41	2733.47	2689.52	2742.96	2863.81	2873.37	2907.66	2750.11	2627.48	2832.87	2817.67	2755.54	2753.51	2607.18
ENSMUSG00000010406.11	Mrpl52	chr14	54426909	54429756	2847	0.0204459	0.120407	0.169806	0.865162	0.956213	-0.0176246	0.121538	-0.145013	0.884701	0.993123	211.706	205.618	208.497	213.175	182.292	207.958	219.046	211.595	259.043	168.625	207.561	194.421	244.383	191.863	203.321
ENSMUSG00000010435.7	Spaca7	chr8	12573029	12600744	27715	-0.028181	0.106287	-0.265141	0.790901	NA	-0.0730436	0.104229	-0.7008	0.483428	NA	2.74123	2.0179	3.20403	2.06966	1.07231	3.75828	1.17137	1.76329	6.20992	2.04394	0.947766	0.957738	4.61101	0.949815	6.29754
ENSMUSG00000010453.12	Kansl3	chr1	36335730	36369181	33451	-0.0389732	0.0502613	-0.775412	0.438096	0.742028	0.0453004	0.0503791	0.89919	0.368551	0.887545	5330.69	5659.09	5479.88	5621.2	5731.48	5713.83	5569.86	5354.23	5069.96	5289.72	5608.88	5291.5	5372.75	5633.35	5621.91
ENSMUSG00000010461.15	Eya4	chr10	23102963	23350786	247823	-0.185449	0.165108	-1.1232	0.261353	0.593634	0.271313	0.165104	1.64329	0.100323	0.616847	1590.29	2770.87	2006.44	2435.99	4095.14	2764.84	1787.51	1102.06	2133.55	1811.95	1313.6	2175.98	2412.48	1579.54	1857.77
ENSMUSG00000010476.14	Ebf3	chr7	137193673	137314445	120772	0.141461	0.159079	0.889246	0.373871	NA	0.218568	0.158494	1.37903	0.167886	NA	14.6169	16.8906	10.8632	15.5224	27.88	11.2748	12.8851	12.343	13.307	8.17576	24.6419	7.6619	8.29982	9.49815	17.993
ENSMUSG00000010492.10	Uckl1os	chr2	181578480	181585170	6690	-0.0365696	0.0933633	-0.391691	0.695286	0.884496	0.0104454	0.0935902	0.111608	0.911134	0.994941	1367.75	1418.06	1406.44	1417.72	1208.49	1395.57	1650.46	1440.61	1379.49	1214.1	1436.81	1434.69	1384.22	1293.65	1513.21
ENSMUSG00000010505.16	Myt1	chr2	181763332	181827797	64465	0.2127	0.0809917	2.62619	0.00863454	0.0966305	-0.0155608	0.0812691	-0.191473	0.848155	0.991148	3498.57	2954.33	2989.43	3117.94	3043.21	2644.57	3011.59	3523.93	3301.9	3361.26	3807.17	3116.48	2620.9	3205.62	3014.72
ENSMUSG00000010517.7	Faf1	chr4	109676588	109963960	287372	-0.100144	0.0623676	-1.6057	0.108339	0.396234	-0.120266	0.0623951	-1.92748	0.0539194	0.481196	27925.9	27524.4	30011.1	26320.9	28325	28308.6	27143	27042.7	28034.3	30340.2	26286.3	32102.4	29907.9	28843	29190.9
ENSMUSG00000010529.6	Gm266	chr12	111484609	111485823	1214	0.0406464	0.103921	0.391126	0.695704	NA	0.115645	0.10299	1.12288	0.261487	NA	3.18696	4.91776	2.35611	6.20898	6.43384	0	7.02822	7.9348	0	1.02197	3.79106	3.83095	1.8444	2.84944	0.899649
ENSMUSG00000010538.14	Tsacc	chr3	88282757	88296999	14242	0.0989018	0.0893868	1.10645	0.268533	0.600825	0.0428612	0.0901207	0.475598	0.634361	0.969251	686.405	657.811	637.466	688.162	684.132	608.841	650.11	697.381	652.929	616.248	779.063	681.909	566.232	662.971	638.751
ENSMUSG00000010554.14	Mettl16	chr11	74770830	74828525	57695	-0.066902	0.0648793	-1.03118	0.302459	0.632125	-0.093738	0.0650948	-1.44002	0.149861	0.712246	3456.28	3390.75	3627.8	3262.82	3337.02	3470.14	3493.02	3514.23	3533.45	3288.7	3488.73	4033.99	3405.69	3548.51	3523.02
ENSMUSG00000010592.8	Dazl	chr17	50279394	50293599	14205	-0.244219	0.119585	-2.04222	0.0411299	0.237778	-0.106006	0.119999	-0.883397	0.377022	0.890543	242.176	271.361	295.722	273.195	233.763	231.76	346.725	220.411	264.365	216.658	267.27	271.998	324.615	283.995	302.282
ENSMUSG00000010601.13	Apol7a	chr15	77388221	77399110	10889	-0.121186	0.100883	-1.20125	0.229655	NA	0.0374124	0.100432	0.372516	0.709509	NA	1.54837	5.80672	4.72152	3.10449	13.94	5.01103	1.17137	2.64493	3.54853	0	0	6.70417	5.53321	6.6487	0
ENSMUSG00000010607.8	Pigyl	chr9	22156846	22158358	1512	-0.0474588	0.16647	-0.285089	0.775576	NA	-0.132371	0.166186	-0.796522	0.425729	NA	22.9221	20.0884	24.5262	26.9056	9.65076	25.0552	18.7419	12.343	31.0496	25.5492	22.7464	24.9012	27.6661	27.5446	17.993
ENSMUSG00000010608.15	Rbm25	chr12	83631236	83683123	51887	-0.0934351	0.0418688	-2.23162	0.0256403	0.184265	-0.0749293	0.0419603	-1.78572	0.0741448	0.548439	11663.6	11817	12457.4	11762.9	11648.5	11797.2	12059.3	11523.1	11891.1	11643.3	11596.9	13054	12254.2	12312.4	12209.1
ENSMUSG00000010609.15	Psen2	chr1	180227004	180263438	36434	0.0827055	0.100434	0.823481	0.410234	0.721589	0.0981428	0.10089	0.972775	0.330665	0.86623	678.713	686.587	637.153	782.331	688.421	612.599	662.995	703.552	703.496	598.874	708.929	645.515	705.484	667.72	529.893
ENSMUSG00000010651.4	Acaa1b	chr9	119148023	119157093	9070	0.0399833	0.140337	0.28491	0.775713	0.920394	0.180074	0.140901	1.27802	0.201242	0.772813	95.6939	108.151	92.106	136.598	94.363	92.7041	108.937	85.5195	96.6974	112.417	88.1422	73.7458	113.431	93.0818	88.1656
ENSMUSG00000010660.3	Plcd1	chr9	119071527	119093502	21975	-0.121392	0.142331	-0.852888	0.393721	0.708644	0.249518	0.142212	1.75455	0.079337	0.564529	263.452	369.357	294.611	396.34	401.043	424.685	255.359	258.322	328.239	287.174	180.075	304.561	325.537	298.242	250.102
ENSMUSG00000010663.4	Fads1	chr19	10182888	10196870	13982	0.135114	0.0864058	1.56372	0.117884	0.412716	-0.00324568	0.0868013	-0.037392	0.970172	0.998383	1748.36	1576.55	1580.27	1684.7	1429.38	1624.83	1567.29	1632.81	1752.09	1741.44	1867.1	1433.73	1846.25	1521.6	1519.51
ENSMUSG00000010721.15	Lmbr1	chr5	29229802	29378390	148588	-0.103883	0.0828671	-1.25361	0.209985	0.540608	-0.05167	0.0829043	-0.623249	0.533121	0.947709	10060.8	10458.7	10867.4	9956.1	11155.2	11530.4	9192.91	10410.5	9978.46	10317.8	9536.42	12111.6	9938.57	10773.7	10645.5
ENSMUSG00000010751.15	Tnfrsf22	chr7	143634806	143649661	14855	0.26002	0.135646	1.91691	0.0552497	0.279214	-0.43728	0.141201	-3.09686	0.00195585	0.0778471	106.516	56.6357	85.1299	67.2639	46.1092	65.1435	48.0262	112.85	91.3746	105.263	116.575	83.3232	74.6983	99.7305	82.7677
ENSMUSG00000010755.17	Cars	chr7	143557230	143600090	42860	-0.0212235	0.0700348	-0.303042	0.761858	0.913867	0.0118584	0.0702118	0.168895	0.865879	0.992237	2976.81	3049.12	3023.16	3364.23	2792.29	3143.17	2896.8	2996.71	2986.97	2989.26	2934.28	3039.86	3236.93	2990.97	2824.9
ENSMUSG00000010796.11	Asz1	chr6	18050964	18109061	58097	-0.194179	0.166493	-1.16629	0.243497	NA	-0.0731999	0.166364	-0.439998	0.659939	NA	16.5517	20	22.167	14.4876	26.8077	18.7914	19.9133	24.686	12.4198	9.19773	19.9031	27.7744	23.055	18.0465	19.7923
ENSMUSG00000010797.6	Wnt2	chr6	17988940	18030585	41645	-0.0814111	0.0814265	-0.999811	0.317402	0.644748	-0.0188494	0.0818126	-0.230398	0.817783	0.988667	940.649	986.312	999.231	940.66	877.147	1067.35	1060.09	982.152	915.52	870.718	994.206	993.174	970.156	961.212	1072.38
ENSMUSG00000010803.13	Gabra1	chr11	42130939	42182930	51991	-0.0702859	0.131426	-0.534794	0.592793	0.834063	0.115819	0.131435	0.881191	0.378214	0.890601	5590.35	6558.4	5938.48	5782.63	6727.65	7187.08	6536.24	5010.39	6333.23	6670.4	4347.4	6467.6	7319.52	5664.69	4302.12
ENSMUSG00000010825.17	Grid2ip	chr5	143357338	143392152	34814	-0.424194	0.164286	-2.58205	0.00982146	0.103807	-0.146745	0.164286	-0.893234	0.371732	0.889719	100.334	140.542	166.53	104.518	218.751	125.276	113.623	87.2828	110.891	96.0652	107.098	170.477	165.074	246.002	84.567
ENSMUSG00000010830.7	Kdelr3	chr15	79516408	79527739	11331	0.183577	0.111439	1.64733	0.0994903	0.379334	0.0286332	0.112354	0.254848	0.798841	0.988088	470.074	415.785	406.582	492.579	331.343	404.641	434.578	511.354	491.471	389.371	488.099	383.095	422.368	433.115	387.749
ENSMUSG00000010841.13	1700006E09Rik	chr11	101984279	101992264	7985	0.00472461	0.157472	0.0300028	0.976065	0.991806	0.175619	0.157688	1.11371	0.265403	0.824661	76.7022	91.5892	76.1996	66.2291	112.592	73.9128	113.623	82.8746	58.5507	84.8235	80.5601	57.4643	106.975	68.3866	71.9719
ENSMUSG00000010911.12	Apip	chr2	103073675	103092644	18969	0.0633397	0.068602	0.923293	0.355855	0.67734	-0.0608582	0.0691972	-0.879489	0.379136	0.891805	1580.65	1444.17	1510.04	1512.92	1417.59	1384.3	1461.87	1535.82	1670.47	1541.13	1575.19	1518.01	1596.33	1570.04	1355.77
ENSMUSG00000010914.10	Pdhx	chr2	103021075	103073513	52438	0.0263112	0.0778271	0.338072	0.735309	0.902901	-0.00196397	0.0779677	-0.0251895	0.979904	0.998383	4111.65	4027.55	4032.91	3523.6	4149.83	4011.33	4425.43	4144.61	4241.38	4201.32	3859.3	3940.13	4356.48	4105.1	3729.94
ENSMUSG00000010936.11	Vac14	chr8	110618585	110720398	101813	0.153531	0.063174	2.43028	0.015087	0.135281	0.0830592	0.0633123	1.3119	0.189555	0.762727	6509.67	6186.4	5828.14	6261.76	6770.54	5691.28	6022.01	6616.74	6227.67	6688.79	6505.46	5854.65	5659.55	5696.04	6102.32
ENSMUSG00000011008.13	Mcoln2	chr3	146149833	146195513	45680	0.156316	0.116474	1.34207	0.179573	NA	0.107972	0.113969	0.947377	0.343447	NA	3.77424	3.09624	1.64304	4.13932	2.14461	3.75828	2.34274	4.40822	2.6614	6.13182	1.89553	2.87321	0	1.89963	1.7993
ENSMUSG00000011034.6	Slc5a1	chr5	33104219	33162870	58651	-0.0351636	0.142724	-0.246376	0.805391	NA	-0.0345474	0.141099	-0.244845	0.806576	NA	6.37222	6.20246	7.00939	11.3831	8.57845	2.50552	2.34274	4.40822	5.32279	8.17576	7.58212	5.74643	10.1442	8.54833	3.59859
ENSMUSG00000011052.6	1700049J03Rik	chr17	26554254	26561499	7245	-0.0150056	0.154424	-0.0971718	0.92259	0.975276	-0.00944889	0.155655	-0.060704	0.951595	0.997521	44.483	44.5398	44.9338	47.6022	38.603	45.0993	46.8548	41.4373	32.8239	57.2303	46.4405	45.9714	53.4877	37.9926	42.2835
ENSMUSG00000011096.17	Akt1s1	chr7	44848991	44855421	6430	0.309724	0.10076	3.07388	0.00211297	0.0391565	0.085533	0.101973	0.838778	0.401594	0.902823	531.086	446.861	418.168	414.967	464.309	402.136	506.032	549.264	501.23	483.392	590.458	364.898	441.735	402.721	463.319
ENSMUSG00000011114.18	Tbrg1	chr9	37648763	37657312	8549	-0.043967	0.0997521	-0.440763	0.659385	0.867301	-0.099229	0.10042	-0.98814	0.323084	0.86214	608.926	583.434	629.822	638.49	497.55	567.5	630.197	574.832	627.202	609.094	624.578	597.629	749.75	606.931	564.979
ENSMUSG00000011118.4	Panx3	chr9	37659902	37669235	9333	0.154971	0.106355	1.4571	0.145088	NA	-0.00524471	0.10361	-0.0506198	0.959629	NA	4.41692	1.73229	1.86668	0	1.07231	0	5.85685	7.05316	2.6614	5.10985	2.8433	2.87321	1.8444	0.949815	1.7993
ENSMUSG00000011148.14	Adssl1	chr12	112620045	112641360	21315	-0.125151	0.113381	-1.10381	0.269676	0.601878	0.178972	0.113317	1.5794	0.114245	0.64841	334.705	426.702	370.228	429.454	511.49	393.366	372.496	314.747	390.338	321.921	311.815	416.616	398.391	326.736	339.168
ENSMUSG00000011154.17	Cfap161	chr7	83774101	83794880	20779	-0.0516307	0.139382	-0.370425	0.711066	0.891294	-0.230659	0.14214	-1.62276	0.10464	0.626459	72.492	61.612	75.9818	53.8112	65.4107	65.1435	62.0826	80.2296	62.0992	62.3402	85.2989	86.1964	65.4763	72.1859	80.0687
ENSMUSG00000011158.8	Brf1	chr12	112960085	113000704	40619	0.092256	0.0687734	1.34145	0.179775	0.502977	-0.0295731	0.0690648	-0.428193	0.668511	0.973369	3211.03	2940.41	3003.81	2890.28	2827.67	3128.14	2915.54	3286.77	3263.76	2851.3	3442.28	3139.47	2925.22	3037.51	2913.06
ENSMUSG00000011171.11	Vipr2	chr12	116077726	116146261	68535	-0.182194	0.143733	-1.26758	0.204946	0.53496	-0.0372656	0.143639	-0.25944	0.795296	0.988032	40.5001	62.6498	69.0582	45.5325	124.388	33.8245	46.8548	29.0943	33.711	34.747	64.4481	94.8161	23.055	119.677	38.6849
ENSMUSG00000011179.8	Odc1	chr12	17544794	17551505	6711	0.229047	0.110606	2.07083	0.0383743	0.229816	-0.181855	0.112983	-1.60957	0.107491	0.632652	319.696	230.717	266.687	232.837	188.726	251.804	249.502	305.931	333.562	333.162	306.128	259.547	323.693	246.002	237.507
ENSMUSG00000011254.16	Thg1l	chr11	45946843	45955494	8651	0.00304454	0.128062	0.023774	0.981033	0.993077	-0.145732	0.129596	-1.12451	0.260797	0.822279	179.131	158.029	178.581	147.981	123.315	162.859	197.961	144.59	204.04	184.977	182.919	175.266	158.619	185.214	195.224
ENSMUSG00000011256.16	Adam19	chr11	46055992	46147343	91351	-0.285384	0.0982527	-2.9046	0.00367726	0.0562168	-0.325907	0.0984211	-3.31135	0.000928461	0.0494542	2369.22	2296.03	2948.63	2470.14	2586.4	2302.57	1824.99	2292.28	2490.18	2351.55	2342.88	3286	2797.96	3058.4	2652.16
ENSMUSG00000011257.19	Pabpc4	chr4	123262351	123298925	36574	0.212532	0.0956561	2.22183	0.0262948	0.186855	0.00420489	0.0966712	0.0434968	0.965305	0.998383	676.95	577.169	575.898	614.689	547.949	493.587	652.453	677.103	684.866	691.874	653.958	574.643	586.52	644.924	497.506
ENSMUSG00000011263.16	Exoc3l2	chr7	19463331	19496762	33431	0.184101	0.15871	1.15998	0.246057	NA	0.0759837	0.157296	0.483063	0.629051	NA	13.7802	11.1169	9.50881	8.27864	19.3015	7.51655	9.37096	11.4614	18.6298	18.3955	6.63436	8.61964	9.22202	7.59852	12.5951
ENSMUSG00000011267.8	Zfp296	chr7	19577287	19580656	3369	0.0615219	0.166627	0.36922	0.711964	0.891376	-0.0779939	0.166477	-0.468497	0.639429	NA	36.099	29.3537	33.0253	33.1146	28.9523	22.5497	32.7983	25.5677	39.0338	28.6152	51.1793	15.3238	49.7989	24.6952	42.2835
ENSMUSG00000011305.11	Plin5	chr17	56111601	56117596	5995	-0.206104	0.121198	-1.70055	0.0890269	0.358685	-0.0656067	0.121567	-0.539676	0.58942	0.96012	257.026	288.32	304.272	300.101	309.897	266.838	276.443	270.665	235.977	263.668	257.792	217.407	308.938	320.087	370.655
ENSMUSG00000011306.7	Sugp1	chr8	70042813	70072347	29534	0.0486212	0.0589922	0.824196	0.409828	0.721248	0.0690446	0.0591436	1.16741	0.243047	0.810017	4636.39	4705.36	4478.31	4826.45	4457.58	4617.67	4919.75	4976.88	4561.63	4352.57	4654.48	4517.65	4329.74	4566.71	4499.14
ENSMUSG00000011349.5	Dmrtc2	chr7	24870057	24877651	7594	0.0287026	0.115433	0.248652	0.80363	NA	-0.01239	0.113235	-0.109419	0.91287	NA	3.4631	2.81115	3.02791	1.03483	5.36153	2.50552	2.34274	4.40822	2.6614	2.04394	4.73883	5.74643	2.76661	0	3.59859
ENSMUSG00000011350.15	Gm5893	chr7	24818795	24840275	21480	0.171947	0.154347	1.11403	0.265265	NA	-0.0160407	0.151544	-0.105849	0.915702	NA	9.09144	5.99601	6.26686	3.10449	7.50615	7.51655	5.85685	10.5797	7.98419	10.2197	7.58212	4.78869	5.53321	6.6487	8.09684
ENSMUSG00000020228.11	Helb	chr10	120083608	120112987	29379	0.30329	0.0800808	3.7873	0.000152296	0.0059738	0.193189	0.0810063	2.38487	0.0170851	0.27875	776.687	716.122	620.905	741.973	698.071	704.05	720.392	788.19	751.401	737.862	829.295	657.008	537.644	625.928	663.041
ENSMUSG00000011427.16	Zfp790	chr7	29816114	29831005	14891	-0.0462749	0.0843927	-0.548328	0.583467	0.82946	-0.0879932	0.0850143	-1.03504	0.300651	0.851729	849.738	824.077	879.539	768.879	801.013	790.491	935.924	846.379	825.92	780.785	945.87	835.148	857.648	885.227	940.133
ENSMUSG00000011463.5	Cpb1	chr3	20248264	20275733	27469	-0.181955	0.138803	-1.31088	0.189897	NA	0.00558767	0.138448	0.0403594	0.967807	NA	5.91642	11.1878	11.0741	18.6269	15.0123	8.76931	2.34274	9.69809	7.98419	4.08788	1.89553	15.3238	7.37761	17.0967	4.49824
ENSMUSG00000011486.14	Slc25a41	chr17	57032773	57041654	8881	-0.0501192	0.166693	-0.300668	0.763668	0.914804	0.126416	0.16671	0.758298	0.448272	NA	20.6104	26.172	21.9669	17.5921	31.0969	32.5717	23.4274	16.7512	13.307	29.6371	22.7464	24.9012	23.9772	22.7955	16.1937
ENSMUSG00000011589.8	Fsd1	chr17	55986511	55996881	10370	0.0626878	0.0826171	0.758775	0.447987	0.748943	0.0262258	0.0830822	0.315661	0.75226	0.984462	1159.69	1128.38	1107.07	1260.42	1080.88	1053.57	1118.66	1213.14	1170.13	1120.08	1135.42	956.78	1151.83	1182.52	1137.16
ENSMUSG00000011632.7	Pinlyp	chr7	24541658	24546118	4460	0.0018224	0.139681	0.0130468	0.98959	NA	-0.0498738	0.137919	-0.361617	0.717638	NA	7.21179	6.01966	7.14635	12.418	3.21692	3.75828	4.68548	7.9348	8.87132	9.19773	2.8433	3.83095	4.61101	6.6487	13.4947
ENSMUSG00000011658.15	Fuz	chr7	44896079	44902631	6552	-0.0494952	0.109144	-0.453486	0.650199	0.863251	0.031767	0.109311	0.290611	0.771349	0.984875	1122.4	1195.98	1166.87	1422.89	1145.22	930.8	1284.99	987.442	1148.84	1175.27	1178.07	1068.84	1277.25	1096.09	1225.32
ENSMUSG00000011751.16	Sptbn4	chr7	27356383	27447686	91303	0.00570173	0.088793	0.0642137	0.9488	0.983224	0.0785152	0.0888084	0.884097	0.376644	0.890523	19565.7	20664.9	19481.8	21197.5	20715.9	20916.1	19830.1	20820	16908.7	19683.1	20850.8	18669.2	17081.9	19567.1	22609.1
ENSMUSG00000011752.6	Pgam1	chr19	41911871	41918664	6793	0.112198	0.108543	1.03367	0.301288	0.631123	0.00648567	0.109454	0.0592547	0.952749	0.997627	435.868	400.872	399.091	411.862	404.26	345.761	441.606	417.018	495.02	421.052	410.382	352.448	483.234	400.822	359.859
ENSMUSG00000011831.16	Evi5	chr5	107744795	107875107	130312	-0.265554	0.0893619	-2.97167	0.00296189	0.0487466	-0.067447	0.0893717	-0.754679	0.450441	0.922779	11129.2	12916.9	13588.5	12514.2	13884.2	13727.7	11541.5	10809.8	12007.3	11847.7	9852.02	15139.9	13484.4	13703	12026.5
ENSMUSG00000011832.15	Evi5l	chr8	4166567	4211257	44690	-0.0170908	0.0542465	-0.315058	0.752717	0.910667	0.0180436	0.0543975	0.331699	0.740117	0.984095	4843.04	4965.57	4902.52	4983.74	5215.7	4979.72	4683.14	4719.44	4943.99	4683.69	5025.05	4716.86	5014.93	5027.37	4850.91
ENSMUSG00000011837.4	Snapc2	chr8	4253080	4256220	3140	0.0968822	0.129589	0.747609	0.454696	0.753452	-0.0196643	0.130981	-0.150131	0.880661	0.992567	174.075	157.472	160.286	152.12	152.268	124.023	201.476	179.855	166.781	181.911	167.755	132.168	183.518	183.314	142.145
ENSMUSG00000011877.13	Git1	chr11	77493562	77507786	14224	-0.0417309	0.068473	-0.60945	0.542226	0.806452	-0.0503193	0.0687315	-0.732115	0.464098	0.930336	2497.66	2482.22	2574.51	2622.26	2305.46	2479.21	2521.96	2501.23	2441.39	2365.86	2682.18	2403.92	2711.27	2690.82	2492.03
ENSMUSG00000011884.13	Gltp	chr5	114669398	114690984	21586	0.326003	0.125748	2.59252	0.00952764	0.102156	0.00476539	0.12641	0.0376978	0.969929	0.998383	689.939	527.62	525.693	520.519	526.502	538.686	524.774	754.688	618.331	524.271	862.467	611.037	413.146	560.391	518.198
ENSMUSG00000011958.17	Bnip2	chr9	69989466	70008317	18851	-0.0778167	0.0886652	-0.877646	0.380136	0.698073	0.0805206	0.0887777	0.906991	0.364411	0.885942	1502.28	1691.91	1593.03	1761.28	1726.41	1642.37	1637.57	1464.41	1725.47	1496.16	1323.08	1608.04	1711.61	1668.82	1383.66
ENSMUSG00000011960.12	Ccnt1	chr15	98538689	98570923	32234	-0.0567754	0.0654721	-0.86717	0.385849	0.702818	0.00861402	0.0655969	0.131317	0.895524	0.993536	3974.73	4167.58	4141.26	4093.79	3887.11	4077.73	4611.68	4080.25	4090.57	3968.31	3759.79	3987.06	4341.73	4172.54	4063.71
ENSMUSG00000012017.3	Scarf2	chr16	17797282	17808287	11005	0.228121	0.163437	1.39577	0.162783	0.479727	-0.196672	0.164258	-1.19733	0.231177	0.804134	78.9889	47.6901	61.1911	76.5774	43.9646	35.0772	35.1411	73.1765	106.456	50.0765	86.2467	67.0417	64.5541	64.5874	48.581
ENSMUSG00000012042.8	4930579F01Rik	chr3	138164078	138193825	29747	0.0622418	0.128901	0.482866	0.629191	NA	0.048271	0.12715	0.379637	0.704215	NA	5.34073	5.12793	4.2135	5.17415	3.21692	6.26379	5.85685	6.17151	1.77426	2.04394	11.3732	7.6619	1.8444	2.84944	4.49824
ENSMUSG00000012076.8	Brms1l	chr12	55836324	55869736	33412	-0.0643263	0.0616332	-1.04369	0.296627	0.627402	-0.0494747	0.0617656	-0.801007	0.423128	0.912334	5125.95	5181.9	5368.83	4810.92	5282.18	5439.48	5195.02	5199.94	5100.12	4935.09	5268.63	5708.12	4972.51	5412.99	5381.7
ENSMUSG00000012114.16	Med15	chr16	17651221	17722930	71709	-0.179301	0.0597808	-2.99931	0.00270594	0.0462485	-0.163455	0.0598685	-2.73024	0.0063288	0.162998	8026.05	8117.13	9126.74	7926.8	8575.23	7926.2	8040.28	8270.71	7741.11	8461.91	7630.46	9358.06	8526.68	9120.12	9502.09
ENSMUSG00000012117.13	Dhdds	chr4	133969028	134000918	31890	-0.0765339	0.0547672	-1.39744	0.162281	0.479226	-0.0178588	0.0549109	-0.325233	0.745005	0.984462	4498.13	4690.85	4750.5	4670.19	4573.39	4815.6	4704.22	4672.72	4260.89	4375.05	4683.86	4825.08	4498.5	4769.02	4909.38
ENSMUSG00000012123.16	Crybg2	chr4	134060815	134092504	31689	0.249939	0.13362	1.87052	0.061411	0.296048	-0.0113906	0.136771	-0.0832821	0.933627	0.996145	97.0697	76.9478	78.1026	96.2392	69.6999	73.9128	67.9394	84.6379	94.9231	107.307	101.411	74.7036	72.8539	89.2826	75.5705
ENSMUSG00000012126.16	Ubxn11	chr4	134102570	134127593	25023	0.106512	0.0708051	1.5043	0.132503	0.436868	-0.0420276	0.0713762	-0.588818	0.555983	0.952313	1688.37	1515	1562.83	1631.93	1467.99	1370.52	1589.55	1690.11	1747.65	1546.24	1769.48	1553.45	1549.3	1563.39	1585.18
ENSMUSG00000012187.13	Mogat1	chr1	78510991	78538173	27182	0.0939271	0.140816	0.66702	0.504759	NA	-0.0324839	0.138585	-0.234397	0.814677	NA	8.19803	5.49956	6.23798	5.17415	10.7231	3.75828	2.34274	7.05316	9.75845	11.2417	4.73883	4.78869	11.0664	1.89963	7.19719
ENSMUSG00000012211.13	Tex22	chr12	113074502	113088917	14415	-0.020776	0.164965	-0.125942	0.899778	0.967286	-0.102303	0.165537	-0.618006	0.536571	NA	29.1772	26.3036	29.9372	26.9056	32.1692	25.0552	21.0847	30.8576	27.5011	20.4394	37.9106	18.197	34.1215	33.2435	34.1867
ENSMUSG00000012282.2	Wnt8a	chr18	34542313	34548273	5960	-0.157682	0.166724	-0.945766	0.344268	0.667189	-0.042273	0.166702	-0.253584	0.799817	NA	21.4278	25.3722	26.8259	24.8359	30.0246	32.5717	14.0564	32.6208	20.404	19.4174	13.2687	22.9857	30.4327	32.2937	21.5916
ENSMUSG00000012296.16	Tjap1	chr17	46257851	46283026	25175	-0.169284	0.0787941	-2.14843	0.0316794	0.208436	0.00197434	0.078915	0.0250186	0.98004	0.998383	1504.69	1706.73	1704.38	1740.58	1785.39	1604.78	1696.14	1590.49	1400.78	1505.36	1522.11	1635.82	1597.25	1623.23	1961.23
ENSMUSG00000012350.15	Ehf	chr2	103263433	103303278	39845	0.0493322	0.116108	0.424883	0.670922	NA	0.113326	0.114629	0.988635	0.322842	NA	3.09309	4.04579	2.32016	7.24381	6.43384	2.50552	0	2.64493	1.77426	5.10985	2.8433	1.91548	2.76661	1.89963	2.69895
ENSMUSG00000012396.12	Nanog	chr6	122707489	122714633	7144	-0.185953	0.162408	-1.14498	0.252219	NA	0.00185129	0.162057	0.0114237	0.990885	NA	7.93236	11.3535	11.1882	9.31347	12.8677	15.0331	8.19959	7.05316	7.09706	7.15379	10.4254	11.4929	11.0664	11.3978	10.7958
ENSMUSG00000012405.16	Rpl15	chr14	18267823	18271391	3568	0.0434375	0.124363	0.34928	0.726879	0.898245	-0.0763853	0.12512	-0.610495	0.541534	0.949693	375.851	340.123	362.425	345.633	288.45	326.97	399.437	316.51	437.356	402.656	346.882	346.701	456.49	317.238	329.271
ENSMUSG00000012422.14	Tmem167	chr13	90089123	90143907	54784	0.0701902	0.0801654	0.875568	0.381265	0.699014	-0.021448	0.0803398	-0.266966	0.789495	0.986733	3914.31	3659.15	3716.89	3430.46	3294.13	3903.6	4008.43	3872.18	4068.39	3641.28	4075.39	3690.16	3962.7	3840.1	3374.58
ENSMUSG00000012428.9	Steap4	chr5	7960457	7982213	21756	-0.0787932	0.110107	-0.715606	0.474235	NA	-0.0512886	0.10946	-0.468559	0.639385	NA	6.11724	7.27407	9.46501	2.06966	9.65076	15.0331	2.34274	0.881644	12.4198	10.2197	0.947766	13.4083	6.45541	17.0967	0.899649
ENSMUSG00000012429.9	Mplkip	chr13	17695192	17699748	4556	0.0277403	0.0896726	0.309351	0.757055	0.91171	0.0631072	0.0902647	0.699134	0.484468	0.935156	592.811	608.761	580.53	655.047	530.792	585.038	664.167	555.436	607.685	583.545	624.578	584.22	644.619	548.993	544.287
ENSMUSG00000012443.3	Kif11	chr19	37376403	37421859	45456	0.228453	0.113211	2.01794	0.0435972	0.24577	-0.315347	0.118076	-2.67071	0.00756909	0.18076	179.078	115.315	149.488	104.518	126.532	117.759	112.451	164.868	189.846	163.515	198.083	153.238	130.953	166.218	147.542
ENSMUSG00000012483.4	Rpa3	chr6	8255936	8259173	3237	0.114608	0.123234	0.930004	0.352369	0.674547	0.0553004	0.124311	0.444857	0.656423	0.971647	224.627	214.021	204.233	212.14	187.654	207.958	248.33	193.08	249.284	212.57	243.576	164.731	249.917	207.06	195.224
ENSMUSG00000012519.14	Mlkl	chr8	111311797	111338177	26380	0.0956367	0.159201	0.600729	0.54802	NA	-0.160094	0.15781	-1.01447	0.310359	NA	20.8522	12.2507	17.4245	7.24381	15.0123	15.0331	11.7137	18.5145	9.75845	15.3295	39.8062	17.2393	9.22202	18.0465	25.1902
ENSMUSG00000012535.14	Tnpo3	chr6	29540827	29609887	69060	-0.0544663	0.0516826	-1.05386	0.291946	0.623568	-0.0638238	0.0518368	-1.23125	0.218231	0.789906	6048.46	6009.01	6287.27	5746.41	5990.98	6100.93	6197.72	6144.18	6086.61	6178.83	5784.21	6637.12	6201.81	6085.46	6224.67
ENSMUSG00000012609.19	Ttll5	chr12	85824659	86061893	237234	-0.0856296	0.0809196	-1.05821	0.289961	0.622025	0.0314657	0.0809445	0.388732	0.697475	0.977018	10837.3	11817.3	11545.8	11509.4	13280.5	11948.8	10530.6	10934.2	11067.9	11741.4	9605.6	11808.9	11754.4	11720.7	10899.2
ENSMUSG00000012640.16	Zfp715	chr7	43296197	43313294	17097	-0.0492057	0.0718031	-0.685287	0.493163	0.777504	-0.0713625	0.0723611	-0.986199	0.324035	0.86223	1132.86	1114.19	1174.29	1153.84	1100.19	1018.49	1184.25	1069.43	1186.1	1127.23	1148.69	1147.37	1221.92	1235.71	1092.17
ENSMUSG00000012705.16	Retn	chr8	3655770	3660110	4340	0.0561313	0.150478	0.373019	0.709135	0.890106	-0.523548	0.15311	-3.41943	0.00062753	0.0383076	105.306	58.5683	99.7428	50.7067	58.9769	42.5938	81.9959	89.9277	101.133	115.483	114.68	107.267	67.3207	109.229	115.155
ENSMUSG00000012777.14	Acpt	chr7	44252148	44257378	5230	0.151139	0.142027	1.06416	0.287258	0.619455	-0.0305168	0.143526	-0.212622	0.831622	0.990735	128.431	108.442	111.92	126.249	110.448	76.4183	120.651	100.507	150.812	128.768	133.635	112.055	136.486	91.1822	107.958
ENSMUSG00000012819.15	Cdh23	chr10	60302748	60696490	393742	0.0912025	0.157897	0.577606	0.56353	0.819167	0.130704	0.158129	0.826562	0.408486	0.907938	165.308	172.506	150.139	135.563	174.786	146.573	233.103	186.909	166.781	136.944	170.598	130.252	117.12	112.078	241.106
ENSMUSG00000012848.15	Rps5	chr7	12922290	12926686	4396	0.0651734	0.15218	0.428266	0.668458	0.873184	-0.157682	0.152975	-1.03077	0.30265	0.853141	168.006	134.583	157.638	174.886	79.3507	117.759	166.334	169.276	173.878	169.647	159.225	132.168	208.418	158.619	131.349
ENSMUSG00000012889.8	Podnl1	chr8	84125989	84132527	6538	0.0147508	0.161672	0.091239	0.927303	0.97705	0.132149	0.162145	0.815006	0.415069	NA	32.7372	37.5624	32.3019	36.219	36.4584	40.0883	37.4838	48.4904	29.2754	27.5932	25.5897	26.8167	37.8103	30.3941	34.1867
ENSMUSG00000013033.16	Adgrl1	chr8	83900105	83941954	41849	-0.0819017	0.0580526	-1.41082	0.158298	0.47382	-0.0373384	0.0580828	-0.642848	0.520323	0.945308	21318.8	22008.9	22605.2	22709.3	21540.5	20881	22905	21422.2	20493.6	21276.4	22082.9	21062.6	23935.7	23084.3	22338.3
ENSMUSG00000013076.17	Amotl1	chr9	14541966	14645056	103090	-0.0287588	0.121834	-0.236048	0.813395	0.935439	-0.0735535	0.121982	-0.602988	0.546517	0.950659	1635.58	1575.81	1674.77	1422.89	2041.67	1269.04	1569.64	1551.69	1587.08	1594.27	1809.28	1538.13	1434.02	2038.3	1688.64
ENSMUSG00000013089.15	Etv5	chr16	22381309	22439719	58410	-0.468004	0.134032	-3.49172	0.000479915	0.0140833	0.02368	0.134022	0.176687	0.859754	0.992237	8773.77	13468.8	13195.7	13166.1	13856.3	12319.6	14533.2	9656.65	7400.45	11761.9	6276.1	10888.5	15943.9	12999.2	12951.3
ENSMUSG00000013091.5	Tmem190	chr7	4782937	4784341	1404	0.014847	0.153515	0.0967139	0.922954	NA	0.0752668	0.152723	0.492834	0.62213	NA	11.3635	13.138	11.008	9.31347	16.0846	21.2969	5.85685	11.4614	15.9684	13.2856	4.73883	13.4083	15.6774	10.448	4.49824
ENSMUSG00000013150.15	Gfod2	chr8	105713854	105758664	44810	-0.162439	0.109167	-1.48799	0.136754	0.442884	-0.0057255	0.109245	-0.0524098	0.958202	0.998112	1434.4	1623.26	1630.68	1573.98	1895.84	1747.6	1275.62	1621.34	1191.42	1527.85	1397.01	1642.52	1601.86	1703.97	1574.39
ENSMUSG00000013155.10	Enkd1	chr8	105703651	105708210	4559	0.00193821	0.137691	0.0140765	0.988769	0.996181	-0.138104	0.139343	-0.991109	0.321632	0.860184	119.453	105.875	119.577	102.448	87.9291	126.529	106.595	141.063	133.957	90.9553	111.836	114.929	142.941	119.677	100.761
ENSMUSG00000013158.6	4933405L10Rik	chr8	105707655	105710246	2591	-0.0202973	0.165497	-0.122644	0.902389	NA	0.0288599	0.165084	0.174819	0.861222	NA	14.8481	16.1468	15.3476	11.3831	21.4461	20.0441	11.7137	19.3962	12.4198	14.3076	13.2687	11.4929	23.055	14.2472	12.5951
ENSMUSG00000013160.7	Atp6v0d1	chr8	105524465	105566047	41582	-0.117723	0.0683842	-1.72149	0.0851624	0.35077	0.0410655	0.0684338	0.600076	0.548456	0.951664	5103.29	5726.92	5557.94	5557.04	5494.5	6357.75	5498.41	5494.41	4829.55	5250.88	4838.34	5407.39	5680.76	5478.53	5665.09
ENSMUSG00000013236.17	Ptprs	chr17	56412426	56476483	64057	-0.0624523	0.0804206	-0.776571	0.437412	0.741678	-0.0301499	0.0804397	-0.374814	0.707799	0.978301	22631.5	23177	23700.2	24069.1	26743.3	20850.9	21044.8	22860.2	22306.9	24105.2	21253.6	23031.7	24119.3	23520.3	24129.5
ENSMUSG00000013275.9	Slc41a1	chr1	131827493	131848865	21372	-0.152592	0.153789	-0.992218	0.321091	0.647769	-0.126736	0.153809	-0.82398	0.409951	0.908576	2733.58	2805.45	3183.42	3185.21	2190.72	2067.05	3778.84	3069	2637.44	2467.04	2760.84	2111.81	3796.7	2443.87	4381.29
ENSMUSG00000013338.16	Fer1l4	chr2	156019139	156052947	33808	-0.0787257	0.153205	-0.513858	0.607351	NA	0.0688773	0.152598	0.451364	0.651727	NA	7.69404	10.7909	9.28079	19.6618	5.36153	8.76931	9.37096	7.9348	6.20992	7.15379	9.47766	8.61964	4.61101	9.49815	14.3944
ENSMUSG00000013353.10	4931406B18Rik	chr7	43492044	43505940	13896	0.15048	0.104565	1.43911	0.150119	NA	0.0464825	0.101535	0.457798	0.647097	NA	3.07591	1.73885	1.18433	1.03483	1.07231	2.50552	2.34274	1.76329	2.6614	4.08788	3.79106	1.91548	0.922202	1.89963	0
ENSMUSG00000013367.5	Iglon5	chr7	43472904	43490075	17171	-0.267561	0.0788703	-3.39241	0.000692796	0.0184445	-0.242734	0.0791193	-3.06795	0.00215532	0.0833243	1829.96	1862.82	2228.64	2002.4	2012.72	1829.03	1607.12	1741.25	1834.59	1857.94	1886.05	2207.59	2362.68	2280.5	2063.79
ENSMUSG00000013415.9	Igf2bp1	chr11	95957163	96005940	48777	0.118113	0.165544	0.713484	0.475547	NA	0.0398014	0.164755	0.241579	0.809106	NA	14.0284	12.3911	11.6114	11.3831	13.94	12.5276	11.7137	14.988	9.75845	14.3076	17.0598	8.61964	13.833	11.3978	12.5951
ENSMUSG00000013418.8	B4galnt2	chr11	95865943	95914891	48948	-0.364682	0.150729	-2.41945	0.015544	0.137203	-0.0377293	0.150535	-0.250634	0.802097	0.988088	57.4786	79.0256	81.7228	90.0302	76.1338	90.1986	59.7398	52.017	46.1309	78.6917	53.0749	73.7458	82.9982	70.2863	99.861
ENSMUSG00000013419.7	Zfp651	chr9	121759330	121771742	12412	0.103856	0.0952959	1.08982	0.275791	0.608001	0.117576	0.0959576	1.22529	0.220466	0.792968	521.365	526.451	481.616	543.286	570.467	467.279	524.774	538.685	537.602	532.446	476.726	413.743	550.554	468.259	493.907
ENSMUSG00000013465.19	Nelfb	chr2	25199712	25211489	11777	0.0321844	0.0975528	0.329918	0.741462	0.906026	0.0466047	0.0981603	0.474781	0.634943	0.96969	540.209	546.03	527.147	556.738	599.419	551.214	476.747	558.081	565.99	560.04	476.726	493.235	595.742	550.892	468.717
ENSMUSG00000013483.14	Card14	chr11	119307768	119345375	37607	-0.0377548	0.162838	-0.231855	0.81665	NA	-0.0351615	0.162166	-0.216824	0.828345	NA	15.5798	15.4115	16.5775	18.6269	21.4461	7.51655	14.0564	9.69809	17.7426	23.5053	11.3732	11.4929	15.6774	25.645	13.4947
ENSMUSG00000013495.15	Tmem175	chr5	108629770	108648782	19012	0.0470216	0.061811	0.760731	0.446818	0.748762	0.0752827	0.0619196	1.21582	0.224055	0.795851	5889.5	6009.71	5693.73	6420.08	5702.53	5623.63	6292.6	5873.51	5743.29	5865.09	6076.13	5499.33	5914.08	5890.75	5470.76
ENSMUSG00000013523.13	Bcas1	chr2	170346991	170427845	80854	0.031977	0.149315	0.214158	0.830424	0.941835	-0.0541116	0.149298	-0.362441	0.717023	0.980185	1021.07	822.362	944.848	526.728	910.388	655.193	1197.14	1333.93	476.39	721.511	1552.44	589.009	661.219	515.749	2013.41
ENSMUSG00000013539.13	Tango2	chr16	18300825	18348103	47278	-0.176033	0.0665778	-2.64401	0.00819292	0.0936021	0.0376993	0.0665974	0.566078	0.571341	0.956283	7052.21	8230.64	8009.34	8132.73	8666.38	8521.26	7602.19	7067.26	6692.52	7614.7	6834.34	8089.06	8450.13	8004.09	7494.07
ENSMUSG00000013562.12	4833413E03Rik	chr17	31557126	31559113	1987	0.180194	0.155047	1.16219	0.245158	NA	0.0627926	0.152849	0.410814	0.681209	NA	9.37595	7.2692	6.32465	8.27864	7.50615	6.26379	7.02822	7.05316	7.98419	9.19773	13.2687	5.74643	6.45541	9.49815	3.59859
ENSMUSG00000013584.5	Aldh1a2	chr9	71215789	71296243	80454	0.573258	0.163771	3.50037	0.000464609	NA	0.0704038	0.161618	0.43562	0.663113	NA	21.6617	9.45892	8.32322	8.27864	15.0123	7.51655	7.02822	17.6329	27.5011	23.5053	18.0075	6.70417	10.1442	4.74907	11.6954
ENSMUSG00000013593.12	Ndufs2	chr1	171234853	171251388	16535	0.0178632	0.101817	0.175444	0.860731	0.953838	-0.0168093	0.102018	-0.164767	0.869127	0.992432	1817.62	1769.07	1792.47	2087.25	1463.7	1597.27	1928.07	1697.17	1793.78	1825.24	1954.29	1683.7	1975.36	1659.33	1851.48
ENSMUSG00000020241.13	Col6a2	chr10	76595762	76623630	27868	0.652998	0.0899411	7.26028	3.86296e-13	1.74836e-10	0.28252	0.0909525	3.10624	0.00189483	0.0766825	1092.06	827.081	668.422	835.108	863.207	801.766	808.245	1108.23	1200.29	929.993	1129.74	616.783	738.684	702.863	615.36
ENSMUSG00000013622.15	Atraid	chr5	31048312	31054623	6311	0.017826	0.112505	0.158446	0.874105	0.959183	-0.025512	0.112978	-0.225813	0.821347	0.989198	630.316	609.28	621.334	605.375	451.441	637.654	742.648	567.779	678.656	640.775	634.055	588.051	668.596	608.831	619.858
ENSMUSG00000013629.16	Cad	chr5	31054780	31078479	23699	0.116985	0.0846966	1.38122	0.167211	0.484884	-0.148611	0.0865207	-1.71764	0.0858624	0.579672	527.807	432.591	483.81	494.649	381.741	433.455	420.522	504.301	544.699	519.161	543.07	462.587	499.833	499.602	473.215
ENSMUSG00000013643.13	Lypd8	chr11	58379043	58390728	11685	-0.0525718	0.14214	-0.369859	0.711488	NA	-0.114859	0.140025	-0.820277	0.412058	NA	6.16722	5.0223	7.16681	4.13932	7.50615	3.75828	4.68548	6.17151	8.87132	2.04394	7.58212	7.6619	4.61101	3.79926	12.5951
ENSMUSG00000013646.17	Sh3bp5l	chr11	58330724	58347728	17004	0.024602	0.082793	0.29715	0.766352	0.915682	0.00661931	0.0832103	0.0795491	0.936596	0.996145	1203.8	1187.17	1181.99	1315.27	1132.36	1071.11	1229.94	1219.31	1182.55	1244.76	1168.59	1095.65	1134.31	1339.24	1158.75
ENSMUSG00000013653.2	1810065E05Rik	chr11	58421111	58426024	4913	-0.0358176	0.0646252	-0.554235	0.579418	NA	0.0691776	0.0640517	1.08003	0.28013	NA	0.220411	2.46491	0.953776	5.17415	0	0	4.68548	0.881644	0	0	0	1.91548	0	1.89963	0
ENSMUSG00000013662.5	Atad1	chr19	32672563	32712298	39735	-0.104059	0.0733065	-1.4195	0.155754	0.470806	-0.076428	0.0734258	-1.04089	0.297927	0.851243	4239.06	4326.54	4574.06	4004.79	4061.9	4628.94	4610.51	4282.15	4380.66	4236.07	4057.38	4808.8	4828.65	4524.92	4133.89
ENSMUSG00000013663.7	Pten	chr19	32757497	32826160	68663	-0.0924174	0.0636912	-1.45102	0.146773	0.45807	0.0731619	0.0637066	1.14842	0.250795	0.816743	17020.3	19177	18191.7	17890.1	19282.2	19412.7	20123	17158.6	15503.5	17494.1	17925.1	18048.6	19021.3	17299.9	18396.9
ENSMUSG00000013668.9	4933402N03Rik	chr7	131137713	131146314	8601	-0.0398771	0.0945573	-0.421724	0.673226	NA	-0.104213	0.0926516	-1.12478	0.260683	NA	2.31217	1.1873	3.01927	0	1.07231	2.50552	1.17137	0	4.43566	1.02197	3.79106	0.957738	0.922202	5.69889	4.49824
ENSMUSG00000013698.12	Pea15a	chr1	172196728	172206804	10076	-0.0967982	0.107715	-0.898654	0.368837	0.688935	0.015567	0.107845	0.144346	0.885227	0.993123	1233.72	1347.31	1331.35	1444.62	1518.39	1302.87	1123.34	1235.18	1289	1286.66	1124.05	1216.33	1559.44	1431.37	1118.26
ENSMUSG00000013701.12	Timm23	chr14	32180162	32201898	21736	0.0135435	0.0621941	0.217761	0.827615	0.940274	-0.0407706	0.0626496	-0.650772	0.515194	0.943368	1899.37	1827.26	1881.22	1792.33	1724.27	1813.99	1978.44	1838.23	2035.08	1858.96	1865.2	1892.49	1913.57	1867.34	1851.48
ENSMUSG00000013707.3	Tnfaip8l2	chr3	95139521	95142360	2839	0.0639507	0.155171	0.412132	0.680243	0.877618	0.071017	0.156141	0.454827	0.649233	0.971647	54.4386	55.0204	51.0275	50.7067	38.603	47.6048	83.1672	52.8987	59.4378	55.1864	50.2316	52.6756	44.2657	53.1896	53.9789
ENSMUSG00000013736.16	Trnt1	chr6	106769120	106782474	13354	0.0607112	0.0581683	1.04372	0.296616	0.627402	0.0295492	0.0586686	0.503663	0.614498	0.963666	1737.81	1700.02	1663.96	1613.3	1679.23	1666.17	1841.39	1782.68	1703.29	1726.11	1739.15	1650.18	1714.37	1642.23	1649.06
ENSMUSG00000013766.11	Ly6g6e	chr17	35076902	35078804	1902	-0.224564	0.133399	-1.6834	0.0922975	NA	-0.0455687	0.132833	-0.343052	0.731559	NA	3.25019	6.76223	7.65525	8.27864	3.21692	5.01103	10.5423	0.881644	6.20992	3.06591	2.8433	5.74643	15.6774	3.79926	5.39789
ENSMUSG00000013787.15	Ehmt2	chr17	34898469	34914052	15583	0.0160849	0.0658459	0.244281	0.807013	0.932632	0.0489092	0.0660429	0.740568	0.458955	0.926928	2918.43	2987.63	2884.51	3136.57	3095.75	2860.05	2858.14	2853	2831.73	2872.76	3116.25	2690.29	2794.27	3061.25	2992.23
ENSMUSG00000013822.7	Elof1	chr9	22112989	22117172	4183	0.0492727	0.129354	0.380914	0.703267	0.887641	-0.0349128	0.130637	-0.26725	0.789277	0.986591	171.535	159.904	164.67	152.12	153.34	149.078	185.076	176.329	191.62	140.01	178.18	150.365	213.951	139.623	154.74
ENSMUSG00000013833.15	Med16	chr10	79894708	79908923	14215	0.200896	0.0938289	2.14109	0.0322669	0.210302	0.0445684	0.0947834	0.470213	0.638203	0.969966	653.243	580.271	561.194	589.853	594.058	537.433	599.741	611.861	755.836	560.04	685.235	516.221	589.287	585.086	554.184
ENSMUSG00000013846.9	St3gal1	chr15	67102875	67113992	11117	-0.18736	0.149903	-1.24987	0.211346	0.542412	-0.0107309	0.149963	-0.0715569	0.942955	0.996786	428.968	509.052	514.156	421.176	600.492	615.105	399.437	431.124	467.519	486.458	330.77	474.08	680.585	571.788	330.171
ENSMUSG00000013858.14	Tmem259	chr10	79974948	79984330	9382	0.056726	0.118509	0.478664	0.632178	0.853476	0.0623768	0.118729	0.525372	0.599325	0.961843	984.794	989.462	940.32	1006.89	863.207	853.129	1234.62	1025.35	1007.78	927.949	978.094	730.754	1094.65	916.571	1019.3
ENSMUSG00000013878.18	Rnf170	chr8	26119368	26151790	32422	0.101407	0.0593362	1.70903	0.0874452	0.355751	0.0946293	0.0596162	1.58731	0.112443	0.645123	2774.64	2761.05	2580.49	2814.74	2772.98	2762.33	2694.15	2696.07	2839.71	2746.03	2816.76	2648.15	2610.75	2722.17	2340.89
ENSMUSG00000013921.15	Clip3	chr7	30291728	30308367	16639	0.0177024	0.08136	0.217581	0.827756	0.940274	0.0369259	0.0814623	0.453289	0.650341	0.971647	4376.48	4438.52	4319.46	4815.06	4496.18	4122.83	4320.01	4322.7	4527.03	4559.01	4097.19	4067.51	4939.31	4371.05	3899.98
ENSMUSG00000013928.13	Thap8	chr7	30280094	30290237	10143	0.0443332	0.149018	0.297502	0.766083	NA	0.0462001	0.147965	0.312237	0.75486	NA	11.182	11.2049	10.0668	14.4876	19.3015	7.51655	3.51411	17.6329	13.307	7.15379	6.63436	17.2393	5.53321	7.59852	9.89614
ENSMUSG00000013936.12	Myl2	chr5	122100951	122113472	12521	0.042532	0.143651	0.296079	0.76717	NA	-0.130334	0.140728	-0.926141	0.354372	NA	7.25048	4.14981	6.44964	6.20898	4.28923	3.75828	2.34274	7.9348	4.43566	7.15379	9.47766	3.83095	9.22202	2.84944	9.89614
ENSMUSG00000013973.12	Dedd	chr1	171329145	171342331	13186	-0.0461545	0.0809151	-0.570407	0.568402	0.821523	-0.0859127	0.0815923	-1.05295	0.292364	0.845986	828.493	804.834	857.404	790.61	812.808	820.557	795.36	916.029	785.112	766.477	846.355	760.444	917.591	851.034	900.548
ENSMUSG00000013974.3	Mcemp1	chr8	3665754	3669259	3505	0.11189	0.119377	0.93728	0.348615	0.671027	-0.444432	0.123388	-3.60191	0.000315888	0.0231922	192.77	121.16	176.058	130.389	115.809	100.221	138.222	210.713	158.797	178.845	222.725	179.097	186.285	164.318	174.532
ENSMUSG00000013997.10	Nit1	chr1	171338008	171345646	7638	-0.0359453	0.0805605	-0.44619	0.65546	0.866297	-0.0776036	0.0811257	-0.956584	0.338777	0.873085	1008.78	977.597	1035.74	1091.75	899.665	905.745	1013.23	1021.83	974.958	1013.79	1024.53	936.668	1121.4	1029.6	1055.29
ENSMUSG00000014030.15	Pax5	chr4	44524757	44710487	185730	-0.22003	0.162543	-1.35367	0.175841	0.497166	0.0218124	0.162648	0.134108	0.893317	NA	24.9512	33.0543	32.0902	30.0101	33.2415	33.8245	35.1411	20.2778	28.3882	25.5492	25.5897	38.3095	25.8217	23.7454	40.4842
ENSMUSG00000014039.17	Prdm15	chr16	97791467	97851850	60383	-0.135215	0.0698508	-1.93577	0.0528962	0.273547	-0.167525	0.0699903	-2.39355	0.0166862	0.276196	4921.28	4806.28	5428.72	5000.3	4602.34	4538.74	5083.74	4899.3	4459.61	5121.09	5205.13	5509.87	5107.15	5344.61	5753.25
ENSMUSG00000014074.17	Rnf168	chr16	32277459	32301434	23975	0.0823738	0.0776207	1.06123	0.288583	0.620435	0.000117783	0.0782552	0.00150512	0.998799	0.999532	1091.48	1028.05	1027.6	995.506	937.196	1021	1158.48	1132.03	1136.42	1084.31	1013.16	1096.61	1019.03	992.556	1002.21
ENSMUSG00000014075.15	Tctex1d2	chr16	32419702	32429099	9397	0.0226578	0.089956	0.251877	0.801136	0.930779	-0.0347708	0.0904139	-0.384574	0.700553	0.977602	1095.44	1049.31	1077.11	1079.33	916.822	1010.98	1190.11	1055.33	1088.51	995.399	1242.52	1092.78	1070.68	1128.38	1016.6
ENSMUSG00000014077.13	Chp1	chr2	119547697	119587027	39330	-0.103025	0.0700012	-1.47175	0.141087	0.449139	-0.0381201	0.0701586	-0.543343	0.586894	0.959481	2876.62	3015.84	3100.03	2816.81	3182.61	3259.68	2804.26	2948.22	2798.01	3050.58	2709.66	3213.21	2997.16	3018.51	3171.26
ENSMUSG00000014158.12	Trpv4	chr5	114622152	114658421	36269	-0.0197526	0.16603	-0.11897	0.905299	0.969125	-0.0553897	0.165939	-0.333796	0.738534	0.984095	76.0186	71.9533	78.2501	63.1246	76.1338	68.9017	79.6531	73.1765	83.3904	73.5818	73.9257	65.1262	33.1993	44.6413	170.034
ENSMUSG00000021223.13	Papln	chr12	83763634	83792382	28748	0.535023	0.131318	4.07425	4.61635e-05	0.00236701	0.732918	0.131367	5.57915	2.4169e-08	1.38221e-05	878.856	1039.88	553.667	1242.83	854.628	854.381	1207.68	1013.89	721.238	879.916	900.377	450.137	542.255	538.545	683.733
ENSMUSG00000014177.10	Tvp23b	chr11	62879455	62916780	37325	0.161265	0.074682	2.15936	0.0308222	0.205147	0.126327	0.0751552	1.68089	0.0927848	0.599536	1327.39	1295.04	1180.15	1232.48	1228.86	1352.98	1365.82	1384.18	1346.67	1185.49	1393.22	1217.29	1216.38	1192.97	1093.97
ENSMUSG00000014195.15	Dnajc7	chr11	100582818	100620168	37350	-0.0350113	0.072999	-0.479614	0.631502	0.852984	-0.0105429	0.0730813	-0.144262	0.885293	0.993123	6276.57	6390.26	6439.41	6555.65	5871.95	6328.94	6804.49	6709.31	6083.06	5763.91	6550.01	6368	5937.14	6609.76	6842.73
ENSMUSG00000014198.15	Zfp385c	chr11	100627543	100692455	64912	0.258648	0.14795	1.74821	0.0804282	0.33959	-0.2195	0.149909	-1.46422	0.143135	0.699796	142.229	89.9051	111.719	95.2044	77.2061	68.9017	118.308	160.459	131.296	97.0871	180.075	109.182	102.364	112.078	123.252
ENSMUSG00000014226.10	Cacybp	chr1	160202367	160212875	10508	-0.0300754	0.097259	-0.30923	0.757147	0.911714	-0.00521863	0.0976959	-0.0534171	0.9574	0.998112	723.724	737.73	740.305	670.57	716.301	725.347	838.701	663.878	719.464	755.236	756.317	648.389	865.947	754.153	692.73
ENSMUSG00000014232.14	Cluap1	chr16	3908801	3941147	32346	0.00560838	0.0585499	0.095788	0.923689	0.975704	-0.00856515	0.0587193	-0.145866	0.884027	0.993038	4803.62	4755.49	4785.21	5000.3	4516.55	4625.19	4879.93	5014.79	4959.95	4489.51	4750.2	4914.15	4755.79	4860.2	4610.7
ENSMUSG00000014243.5	Zswim7	chr11	62267224	62281375	14151	0.20476	0.0802183	2.55254	0.0106942	0.109727	0.200681	0.0807171	2.48623	0.0129106	0.242906	1006.18	1003.3	865.362	1083.47	929.69	963.371	1036.66	1033.29	1055.69	958.608	977.146	898.358	885.314	918.471	759.304
ENSMUSG00000014245.8	Pigl	chr11	62458460	62514417	55957	0.0107357	0.0798829	0.134393	0.893092	0.96581	-0.097425	0.0803789	-1.21207	0.225485	0.796917	1446.95	1336	1435.89	1303.89	1396.14	1409.35	1234.62	1369.19	1565.79	1410.32	1442.5	1601.34	1393.45	1454.17	1294.59
ENSMUSG00000014294.4	Ndufa2	chr18	36742332	36744557	2225	0.117124	0.136793	0.856214	0.391879	0.706789	0.0577858	0.137914	0.418999	0.675217	0.975069	144.837	137.48	130.829	161.433	136.183	115.254	137.05	162.223	176.539	115.483	125.105	106.309	153.085	125.376	138.546
ENSMUSG00000014301.12	Pam16	chr16	4616464	4624988	8524	-0.130935	0.0862033	-1.51891	0.128785	0.431167	-0.00264447	0.0864705	-0.0305824	0.975603	0.998383	837.078	921.154	923.096	978.949	866.424	814.293	1024.95	842.852	840.114	784.873	880.474	854.302	938.801	888.077	1011.21
ENSMUSG00000014303.13	Glis2	chr16	4594713	4624924	30211	-0.102146	0.0553425	-1.84571	0.0649344	0.304069	-0.0224683	0.0557229	-0.403214	0.686791	0.977012	1494.81	1582.33	1607.67	1587.43	1589.16	1577.22	1575.49	1482.93	1507.24	1459.37	1529.69	1517.06	1649.82	1581.44	1682.34
ENSMUSG00000014313.14	Cox6c	chr15	35925886	35938246	12360	0.0607749	0.06812	0.892174	0.3723	0.692216	-0.0168333	0.0684747	-0.245832	0.805812	0.988088	2335	2207.28	2234.33	2206.26	2078.13	2070.81	2473.93	2348.7	2266.62	2298.41	2426.28	2166.4	2345.16	2221.62	2204.14
ENSMUSG00000014329.14	Bicc1	chr10	70922832	71159700	236868	0.108927	0.117131	0.929959	0.352392	0.674547	0.430996	0.117119	3.67997	0.000233263	0.0190574	2894.95	3755.72	2649.81	3551.54	4541.22	3592.91	3337.23	2970.26	2650.75	3122.12	2836.66	2610.79	1969.82	2963.42	3055.21
ENSMUSG00000014349.7	Ube2z	chr11	96047432	96065388	17956	0.120781	0.0644979	1.87264	0.061118	0.295241	-0.045382	0.0653813	-0.694112	0.487612	0.935631	1296.03	1149.29	1187.78	1210.75	1079.81	1156.3	1150.28	1252.82	1268.6	1311.19	1351.51	1189.51	1256.96	1187.27	1117.36
ENSMUSG00000014351.12	Gip	chr11	96024545	96030831	6286	-0.112183	0.106096	-1.05737	0.290341	NA	-0.0570125	0.104716	-0.544447	0.586134	NA	1.84796	2.71317	3.74926	4.13932	4.28923	1.25276	1.17137	3.52658	0	1.02197	2.8433	1.91548	5.53321	6.6487	0.899649
ENSMUSG00000014353.14	Tmem87b	chr2	128818118	128854261	36143	-0.056763	0.0527321	-1.07644	0.28173	0.614953	-0.057957	0.0529806	-1.09393	0.273986	0.832478	3540.06	3537.19	3686.41	3532.91	3543.97	3412.51	3659.36	3613.86	3570.71	3408.27	3567.39	3780.19	3859.41	3537.11	3568.91
ENSMUSG00000014355.10	Anapc1	chr2	128610104	128687391	77287	-0.0993235	0.0521911	-1.90307	0.0570308	0.284731	-0.0571769	0.0522795	-1.09368	0.274096	0.832633	8403.51	8660.02	9018.93	8609.78	8314.66	8814.41	8901.24	8525.5	8609.62	8303.51	8175.43	9608.03	8589.39	8883.62	8994.69
ENSMUSG00000014361.5	Mertk	chr2	128698956	128802894	103938	0.0238876	0.142858	0.167212	0.867204	0.95721	-0.00891875	0.142845	-0.0624366	0.950215	0.99752	954.766	869.493	892.306	712.998	817.097	521.148	1426.73	854.313	644.945	661.215	1658.59	420.447	560.699	455.911	2132.17
ENSMUSG00000014402.15	Tsg101	chr7	46888949	46919969	31020	0.00523088	0.0583441	0.0896557	0.928561	0.977269	-0.0367994	0.0586553	-0.627384	0.530408	0.947709	2901.33	2816.42	2891.09	2664.69	2789.07	2842.51	2969.42	2979.96	3008.26	2788.96	2828.13	3059.02	2853.29	2801.95	2850.09
ENSMUSG00000014418.16	Hps5	chr7	46760466	46796064	35598	-0.177858	0.0649775	-2.73723	0.00619594	0.0784408	-0.0458414	0.0650842	-0.70434	0.481221	0.935156	3137.56	3451.21	3567.42	3444.95	3549.33	3284.73	3525.82	3275.31	2998.51	2941.23	3335.19	3446.9	3451.8	3528.56	3842.4
ENSMUSG00000014426.8	Map3k4	chr17	12227621	12318660	91039	0.0527325	0.0864185	0.610199	0.54173	0.806096	0.191947	0.0864422	2.22053	0.026383	0.352184	8768.19	9729.21	8429.02	9681.87	9544.6	8937.18	10753.2	8912.54	8850.03	9113.93	8196.28	7574.75	9147.32	7572.87	9421.12
ENSMUSG00000014444.17	Piezo1	chr8	122481698	122551329	69631	-0.103237	0.140165	-0.736543	0.461401	0.755571	-0.0402277	0.140566	-0.286183	0.774738	0.984875	217.135	229.72	238.161	243.185	264.86	265.585	145.25	243.334	207.589	243.229	174.389	203.998	257.294	224.156	267.196
ENSMUSG00000014453.4	Blk	chr14	63372836	63417037	44201	-0.0545884	0.136074	-0.401168	0.688296	NA	0.0402053	0.134577	0.298754	0.765128	NA	3.45133	4.84445	4.21193	4.13932	4.28923	6.26379	4.68548	4.40822	4.43566	3.06591	1.89553	4.78869	4.61101	4.74907	2.69895
ENSMUSG00000014470.4	Rnf166	chr8	122466147	122476064	9917	-0.168722	0.107774	-1.56551	0.117462	0.412246	-0.0758705	0.107864	-0.703391	0.481812	0.935156	2012.37	2164.59	2297.66	2455.65	1822.92	1857.84	2521.96	1929.04	1957.01	1995.91	2167.54	2021.78	2403.26	2166.53	2599.09
ENSMUSG00000014496.7	Ankrd28	chr14	31700015	31830415	130400	-0.173792	0.075947	-2.28834	0.0221178	0.168763	-0.114177	0.0759738	-1.50284	0.132879	0.681016	15404.2	16093.3	17498.4	15613.5	15878.7	17551.1	15329.7	15849.3	14796.5	15153.8	15817.3	19659.5	15478.2	17560.2	17295.7
ENSMUSG00000014498.9	Ankrd52	chr10	128377115	128408704	31589	-0.0856609	0.0694696	-1.23307	0.217549	0.550186	-0.0231382	0.0695843	-0.33252	0.739496	0.984095	4044.05	4230.97	4303.31	4500.48	4337.48	3876.04	4209.9	3866.01	4239.6	4116.49	3954.08	3926.73	4555.68	4236.17	4494.65
ENSMUSG00000014503.14	Pkd2l2	chr18	34409423	34442789	33366	-0.0890839	0.083463	-1.06735	0.285816	0.618048	-0.0235796	0.0837613	-0.28151	0.77832	0.984875	1154.74	1211.84	1233.15	1271.81	1117.34	1146.27	1311.93	1095.88	1112.46	1259.07	1151.54	1087.03	1270.79	1243.31	1331.48
ENSMUSG00000014504.16	Srp19	chr18	34330847	34336599	5752	0.132967	0.0897546	1.48145	0.138486	0.445196	0.0605992	0.0905694	0.669091	0.503437	0.941103	647.982	613.831	586.263	602.271	547.949	580.027	725.078	600.4	661.8	639.753	689.973	586.136	618.797	584.136	555.983
ENSMUSG00000014529.9	Tmbim7	chr5	3651181	3680325	29144	0.00227433	0.164367	0.0138369	0.98896	0.996198	0.0349454	0.164011	0.213068	0.831274	NA	22.5514	23.9333	22.4343	21.7314	17.1569	27.5607	29.2842	25.5677	12.4198	14.3076	37.9106	15.3238	32.2771	14.2472	27.8891
ENSMUSG00000014542.3	Clec4f	chr6	83644542	83656187	11645	0.128893	0.0949212	1.35789	0.174497	NA	0.0967532	0.0926877	1.04386	0.296549	NA	2.34516	1.90894	0.714342	4.13932	1.07231	1.25276	1.17137	2.64493	1.77426	3.06591	1.89553	0.957738	0	1.89963	0
ENSMUSG00000014543.14	Klra17	chr6	129831154	129876672	45518	0.0290398	0.166726	0.174177	0.861726	NA	-0.117134	0.166566	-0.703226	0.481915	NA	18.8648	15.2633	18.1005	12.418	19.3015	18.7914	10.5423	15.8696	21.2912	18.3955	19.9031	18.197	19.3662	12.3476	22.4912
ENSMUSG00000014547.10	Wdfy2	chr14	62837678	62961509	123831	-0.220946	0.0910347	-2.42705	0.015222	0.135886	0.0184111	0.0910496	0.202209	0.839753	0.991148	3360.41	4024.96	3969.44	3901.31	4530.49	4042.65	3625.39	3356.42	3128.91	3846.69	3109.62	3612.59	4345.41	3784.06	4135.69
ENSMUSG00000014550.14	Rbsn	chr6	92186712	92214925	28213	0.011493	0.081775	0.140545	0.88823	0.964708	-0.0596863	0.0820775	-0.727195	0.467107	0.930831	2042.9	1938.65	2025.82	1844.07	1737.14	1890.41	2283	2071.86	2072.34	1884.51	2142.9	2023.7	2007.63	2012.66	2059.3
ENSMUSG00000014551.8	Mrps25	chr6	92169525	92184033	14508	0.0829019	0.0803141	1.03222	0.301968	0.63183	-0.0623816	0.0806371	-0.77361	0.439162	0.91572	2458.95	2209.18	2313.25	2180.39	2015.94	2154.74	2485.65	2374.27	2672.04	2238.11	2551.38	2242.06	2418.01	2405.88	2187.05
ENSMUSG00000014554.13	Dguok	chr6	83480217	83506969	26752	0.0765689	0.0936274	0.817804	0.413469	0.723561	-0.0119617	0.0937827	-0.127547	0.898508	0.993536	3340.21	3123.3	3151.76	3122.08	2811.59	2828.73	3730.81	3315.86	3183.03	3147.67	3714.29	3124.14	2867.13	3282.56	3333.2
ENSMUSG00000014592.20	Camta1	chr4	150917322	151861876	944554	0.136708	0.0783013	1.74592	0.0808244	0.340568	0.140913	0.0783075	1.79948	0.0719428	0.541552	82045	82299.2	74188.4	78932.7	91659.7	82952.7	75651.7	90944.3	76037	85377.4	75821.2	77629.5	72004.6	72952.4	74167
ENSMUSG00000014599.10	Csf1	chr3	107741048	107760469	19421	0.020528	0.137067	0.149766	0.880949	0.961767	0.0267015	0.13789	0.193644	0.846455	0.991148	152.942	153.536	150.246	159.364	187.654	108.99	158.135	171.921	157.022	135.922	146.904	121.633	139.252	153.87	186.227
ENSMUSG00000014601.13	Strip1	chr3	107612532	107631694	19162	-0.350411	0.139023	-2.52052	0.011718	0.116169	-0.0925485	0.139037	-0.665638	0.505643	0.941246	528.784	666.574	723.511	650.908	683.059	746.644	585.685	525.46	618.331	598.874	372.472	685.74	963.701	705.712	538.89
ENSMUSG00000014602.15	Kif1a	chr1	93015464	93101951	86487	-0.0382317	0.0648317	-0.589708	0.555387	0.814292	0.0974687	0.0648437	1.50313	0.132805	0.681016	27395.3	30212.5	28161.4	30773.8	32940.2	29030.2	28105.8	27589.3	27643	28513	25836.1	26727.6	29658.9	28525.8	27733.5
ENSMUSG00000014603.2	Alx3	chr3	107595031	107605776	10745	-0.0747893	0.0848565	-0.881363	0.378121	NA	-0.072916	0.0832821	-0.87553	0.381286	NA	1.13988	1.16695	2.29833	0	1.07231	1.25276	2.34274	1.76329	1.77426	1.02197	0	2.87321	0.922202	0	5.39789
ENSMUSG00000014606.14	Slc25a11	chr11	70644196	70647479	3283	0.173864	0.103781	1.67529	0.0938764	0.3694	-0.0619789	0.105214	-0.589076	0.55581	0.952313	430.943	359.095	376.576	358.051	298.101	362.047	418.179	436.414	454.212	392.436	440.711	337.124	427.902	357.13	384.15
ENSMUSG00000014609.16	Chrne	chr11	70614883	70619216	4333	0.0652907	0.136491	0.478353	0.632399	0.853564	-0.0745466	0.137999	-0.540198	0.589061	0.96012	137.991	121.947	130.219	105.553	138.328	130.287	113.623	111.969	137.505	119.57	182.919	119.717	118.042	131.074	152.041
ENSMUSG00000014633.15	Cmc2	chr8	116888685	116921455	32770	-0.110864	0.104462	-1.06128	0.288561	0.620435	0.265096	0.104309	2.54144	0.0110396	0.224847	612.648	821.717	668.334	827.864	740.964	932.052	785.989	696.499	530.505	535.512	688.078	702.022	635.397	714.261	621.657
ENSMUSG00000014668.15	Chfr	chr5	110135842	110171972	36130	-0.101683	0.0490498	-2.07305	0.0381673	0.229292	0.0410663	0.0491195	0.836048	0.403128	0.903872	6334.97	7009.65	6808.36	7095.83	7010.74	7064.31	6867.74	6346.08	6581.63	6425.12	5987.04	6631.38	6940.49	6633.5	7028.06
ENSMUSG00000014686.8	Ceacam16	chr7	19852097	19861299	9202	-0.0163759	0.162329	-0.100881	0.919645	0.974115	-0.471442	0.163762	-2.87882	0.0039916	0.124814	52.6569	30.0901	53.3159	41.3932	26.8077	27.5607	24.5988	40.5556	39.9209	69.494	60.657	46.9292	50.7211	42.7417	72.8715
ENSMUSG00000020253.15	Ppm1m	chr9	106194947	106199746	4799	0.572087	0.132845	4.30643	1.65907e-05	0.00102753	-0.208999	0.135966	-1.53714	0.12426	0.667751	251.502	127.136	154.203	144.876	153.34	100.221	110.109	247.742	275.011	259.58	223.673	154.196	165.996	182.364	114.255
ENSMUSG00000014747.6	Ankrd53	chr6	83762644	83768326	5682	-0.0148162	0.093802	-0.157951	0.874495	0.959217	0.050318	0.0943811	0.533136	0.59394	0.961049	483.203	507.766	488.411	465.673	503.984	471.037	590.37	498.129	453.324	501.787	479.569	426.193	510.9	492.954	523.596
ENSMUSG00000014748.13	Tex261	chr6	83768885	83775813	6928	0.0698693	0.107261	0.651394	0.514792	0.789096	-0.0559062	0.108216	-0.516617	0.605423	0.961843	453.156	410.675	428.712	354.947	387.103	394.619	506.032	427.598	440.017	471.128	473.883	372.56	479.545	408.42	454.323
ENSMUSG00000014763.7	Fam120b	chr17	15396246	15433580	37334	-0.0015329	0.0658479	-0.0232793	0.981427	0.993159	0.0341908	0.0659293	0.518598	0.604041	0.961843	6987.67	7170.7	6995.31	7025.46	6754.46	6970.35	7932.51	6883	6731.56	6764.42	7571.7	6770.25	7160.9	7040.03	7010.06
ENSMUSG00000014767.16	Tbp	chr17	15499888	15528379	28491	0.0446515	0.0769391	0.580349	0.561679	0.818382	0.0351391	0.0770589	0.456003	0.648388	0.971456	4580.31	4548.6	4432.59	4610.17	4197.01	4216.79	5170.43	4496.39	4719.54	4348.48	4756.84	4220.75	4795.45	4312.16	4401.98
ENSMUSG00000014769.9	Psmb1	chr17	15475721	15498276	22555	-0.0183062	0.0693913	-0.263811	0.791926	0.927677	-0.0236498	0.0696188	-0.339704	0.73408	0.983875	2752.13	2742.37	2789.05	2506.36	2665.75	2834.99	2962.39	2772.77	2625.02	2610.11	3000.63	2807.13	2714.96	2820	2814.1
ENSMUSG00000014771.12	Pdcd2	chr17	15519208	15527301	8093	0.0651318	0.0845325	0.770494	0.441007	0.744182	0.0644572	0.0848591	0.759579	0.447506	0.921471	1393.12	1392.7	1327.02	1357.7	1274.97	1339.2	1598.92	1311.89	1410.54	1345.93	1504.1	1233.57	1448.78	1270.85	1354.87
ENSMUSG00000014773.13	Dll1	chr17	15367354	15376872	9518	0.182136	0.13751	1.32453	0.185328	0.509895	0.124854	0.138286	0.902867	0.366596	0.886136	206.157	195.683	175.224	219.384	197.304	189.167	176.877	189.554	164.119	220.746	250.21	125.464	211.184	202.31	161.937
ENSMUSG00000014776.7	Nol3	chr8	105276140	105281939	5799	-0.0450158	0.115308	-0.390397	0.696243	0.884684	-0.0383697	0.115925	-0.330986	0.740655	0.984095	372.635	374.065	386.128	390.131	420.344	350.772	335.012	332.38	386.79	429.227	342.143	327.546	460.179	412.22	344.565
ENSMUSG00000014778.10	Fhod1	chr8	105329163	105347953	18790	0.0667204	0.104721	0.637123	0.524045	0.794897	-0.0561178	0.10538	-0.532531	0.594359	0.961049	691.194	627.833	655.825	648.838	546.876	597.566	718.05	621.559	628.089	700.049	815.078	583.262	705.484	637.326	697.228
ENSMUSG00000014782.16	Plekhg4	chr8	105373274	105382862	9588	-0.0276505	0.129922	-0.212824	0.831464	0.942471	-0.501782	0.131367	-3.81971	0.000133609	0.0127351	365.563	242.17	373.97	300.101	241.269	176.639	250.673	356.184	297.189	397.546	411.33	325.631	331.993	421.718	416.537
ENSMUSG00000014786.8	Slc9a5	chr8	105348843	105369881	21038	0.0482935	0.12428	0.388585	0.697583	0.885064	-0.101072	0.12437	-0.812676	0.416404	0.910246	3519.63	3107.93	3381.14	3418.04	2826.6	2252.46	3934.63	3552.15	3615.95	3358.19	3552.23	2917.27	3176.06	3374.69	4056.52
ENSMUSG00000014791.10	Elmo3	chr8	105305601	105310760	5159	0.111004	0.081271	1.36585	0.171985	0.491337	0.10895	0.0823498	1.32302	0.18583	0.759752	447.072	446.443	412.036	456.36	453.586	427.191	448.635	491.076	416.065	413.898	467.248	402.25	406.691	422.667	416.537
ENSMUSG00000014813.9	Stc1	chr14	69029238	69041804	12566	-0.021775	0.120693	-0.180417	0.856825	0.952051	-0.459468	0.123176	-3.73016	0.000191355	0.0167009	250.283	173.718	254.85	152.12	196.232	159.1	187.419	251.269	231.541	259.58	258.74	293.068	260.061	277.346	188.926
ENSMUSG00000014837.15	4931428F04Rik	chr8	105280409	105289864	9455	-0.0410816	0.104508	-0.393093	0.694251	0.884107	-0.026216	0.104948	-0.249799	0.802742	0.988088	645.17	652.063	665.927	670.57	766.699	625.127	545.858	627.731	649.381	710.269	593.301	592.84	766.35	664.87	639.65
ENSMUSG00000014846.12	Tppp3	chr8	105467493	105471526	4033	-0.0662728	0.129556	-0.511537	0.608975	0.843023	-0.0730372	0.130306	-0.560504	0.575136	0.95803	223.107	221.595	235.739	236.976	176.931	186.661	285.814	213.358	205.815	252.427	220.829	205.914	250.839	211.809	274.393
ENSMUSG00000014850.15	Msh3	chr13	92211872	92355003	143131	0.0620719	0.0812469	0.763991	0.444873	0.747245	0.0140238	0.0813499	0.172389	0.863132	0.992237	5631.62	5435.31	5379.13	5468.04	5209.26	5775.22	5288.73	5959.92	5296.18	5319.35	5951.02	6049.07	4713.37	5564.01	5190.07
ENSMUSG00000014852.16	Adamts13	chr2	26973416	27009628	36212	0.00399878	0.162248	0.024646	0.980337	0.992867	0.172934	0.162121	1.0667	0.286109	NA	29.3875	39.462	29.1677	33.1146	85.7845	22.5497	16.3992	20.2778	35.4853	28.6152	33.1718	27.7744	37.8103	30.3941	20.6919
ENSMUSG00000014856.12	Tmem208	chr8	105326354	105335219	8865	0.0997015	0.104814	0.95122	0.341493	0.664712	-0.0553876	0.105284	-0.526076	0.598836	0.961843	1060.93	939.605	981.268	1003.79	878.219	845.612	1030.81	973.335	1013.1	1092.49	1164.8	780.557	1124.16	983.058	1037.3
ENSMUSG00000014859.9	E2f4	chr8	105297663	105305370	7707	-0.045232	0.0730205	-0.619443	0.535625	0.802567	-0.00408537	0.0733267	-0.0557147	0.955569	0.997906	1557.52	1604.5	1609.53	1690.91	1576.29	1475.75	1675.06	1544.64	1533.85	1530.91	1620.68	1462.47	1679.33	1550.1	1746.22
ENSMUSG00000014867.9	Surf4	chr2	26920040	26933928	13888	0.0190992	0.0856421	0.223012	0.823526	0.93886	-0.0909919	0.0864515	-1.05252	0.292562	0.84626	792.852	730.398	781.757	736.799	684.132	705.303	795.36	788.19	826.807	772.609	783.802	730.754	905.602	782.647	708.024
ENSMUSG00000014873.15	Surf2	chr2	26916367	26920183	3816	-0.0176586	0.103484	-0.17064	0.864507	0.955848	0.0565228	0.10379	0.544587	0.586037	0.959176	719.532	761.605	729.086	857.874	747.398	672.731	768.418	675.34	712.367	764.434	725.988	623.487	841.048	643.024	808.784
ENSMUSG00000014905.4	Dnajb9	chr12	44205559	44210326	4767	0.156815	0.130145	1.20493	0.228232	0.562458	0.0976028	0.130802	0.74619	0.455553	0.925059	308.149	293.285	269.524	262.847	253.064	271.849	385.381	307.694	331.787	310.679	282.434	238.477	349.514	234.604	255.5
ENSMUSG00000014907.10	Naf1	chr8	66860217	66890564	30347	0.00886075	0.0870508	0.101788	0.918925	0.973988	0.0516359	0.0873925	0.590851	0.55462	0.952313	1049.6	1084.95	1042.91	1027.59	984.377	1285.33	1042.52	1118.81	1068.99	997.443	1013.16	1097.57	1025.49	972.61	1075.98
ENSMUSG00000014932.15	Yes1	chr5	32611171	32687057	75886	-0.222373	0.109566	-2.02958	0.0423995	0.241967	-0.184064	0.109677	-1.67824	0.0933009	0.599536	2065.64	2129.2	2462.56	2043.79	2279.72	2232.42	1960.87	2089.5	1924.19	1971.38	2277.48	2853.1	1817.66	2610.09	2569.4
[truncated: 34,790 more rows]

## Sheet: DEGs Lists used in Figures
	DEGs at different padj values					DEGs split by Up or Down regulated				DEGs split by gene length (long= >100kb, short =<100kb)
[truncated: 2,155 more rows]
